# Supplementary material
Source: publisher site journal article supplement (https://www.spandidos-publications.com/6656/downloadSupplementary)
Supplement: Supplementary file 1 [file downloadSupplementary]

## Sheet: Sheet1
Table SVII. Module membership and gene significance for tumors in the red module.
probes	module Color	GS. Normal	p.GS. Normal	GS. Tumor	p.GS. Tumor	MM black	p.MM black	MM purple	p.MM purple	MMred	p.MM red	MM yellow	p.MM yellow	MM brown	p.MM brown	MM green	p.MM green	MMblue	p.MM blue	MM magenta	p.MM magenta	MMpink	p.MM pink	MM grey	p.MM grey
ABCA6	black	0.44	3.5e-12	-0.44	3.5e-12	0.54	7.3e-19	0.42	6.6e-11	0.37	8.6e-09	-0.66	3.7e-30	-0.46	2.1e-13	0.041	0.54	0.1	0.12	-0.21	0.0012	-0.35	5.6e-08	-0.47	4.7e-14
ABRA	black	0.29	7.7e-06	-0.29	7.7e-06	0.88	2.5e-76	0.24	0.00025	0.19	0.0048	-0.38	2.2e-09	-0.23	0.00045	-0.023	0.73	-0.14	0.031	-0.22	0.00083	-0.25	0.00017	-0.26	7.1e-05
ACTA1	black	0.3	4.1e-06	-0.3	4.1e-06	0.85	1e-64	0.26	8.5e-05	0.18	0.0064	-0.39	1.1e-09	-0.16	0.017	0.13	0.053	-0.16	0.015	-0.17	0.009	-0.25	0.00018	-0.23	0.00038
ACTC1	black	-0.044	0.51	0.044	0.51	0.77	2.9e-46	0.06	0.37	-0.17	0.011	-0.24	0.00022	0.17	0.0091	0.43	1.3e-11	-0.097	0.14	0.09	0.18	-0.0034	0.96	-0.054	0.41
ACTN2	black	0.22	0.00094	-0.22	0.00094	0.97	4.2e-147	0.19	0.0041	0.11	0.086	-0.42	5.8e-11	-0.14	0.037	0.15	0.022	-0.15	0.026	-0.16	0.019	-0.23	0.0006	-0.22	0.00069
ADSSL1	black	0.26	6.4e-05	-0.26	6.4e-05	0.63	6.5e-27	0.25	0.00016	0.28	1.6e-05	-0.3	4.9e-06	-0.18	0.0067	-0.09	0.17	-0.45	6.5e-13	-0.47	1.2e-13	-0.39	6.4e-10	-0.072	0.28
AGT	black	-0.12	0.075	0.12	0.075	0.62	2e-25	0.19	0.0038	-0.2	0.0024	-0.34	9.7e-08	0.05	0.45	0.41	1.1e-10	0.055	0.41	0.17	0.0087	-0.082	0.22	-0.24	0.00024
ALPK3	black	0.11	0.088	-0.11	0.088	0.86	1.9e-69	0.12	0.073	0.016	0.8	-0.35	7.9e-08	-0.0064	0.92	0.22	0.001	-0.24	0.00033	-0.11	0.097	-0.18	0.008	-0.11	0.11
AMPD1	black	0.37	7.2e-09	-0.37	7.2e-09	0.85	4.9e-65	0.42	3.1e-11	0.32	1.1e-06	-0.56	3.3e-20	-0.48	1.5e-14	-0.08	0.23	0.077	0.25	-0.24	0.00023	-0.32	7.2e-07	-0.51	1.2e-16
ANGPTL1	black	0.41	2e-10	-0.41	2e-10	0.62	1.8e-25	0.34	9.2e-08	0.52	5.6e-17	-0.69	6.9e-34	-0.54	9.3e-19	-0.042	0.53	-0.069	0.3	-0.39	9.2e-10	-0.44	2.2e-12	-0.41	1.2e-10
ANKRD2	black	0.088	0.19	-0.088	0.19	0.72	3.9e-38	0.12	0.074	0.018	0.79	-0.26	5.8e-05	-0.031	0.64	0.1	0.13	-0.2	0.0021	-0.15	0.027	-0.2	0.0029	-0.1	0.13
ANKRD23	black	0.19	0.0036	-0.19	0.0036	0.94	4.7e-107	0.14	0.037	0.074	0.26	-0.37	7e-09	-0.14	0.031	0.12	0.061	-0.1	0.12	-0.14	0.036	-0.21	0.0017	-0.24	0.0002
ANO5	black	0.29	9.1e-06	-0.29	9.1e-06	0.9	2.2e-84	0.41	6.9e-11	0.18	0.006	-0.49	4.1e-15	-0.25	0.00012	0.043	0.52	-0.099	0.14	-0.19	0.0043	-0.26	7.8e-05	-0.33	2.6e-07
AOC3	black	0.4	2.7e-10	-0.4	2.7e-10	0.66	4.7e-30	0.4	4.3e-10	0.38	3e-09	-0.71	2.8e-36	-0.39	1.1e-09	0.14	0.041	-0.094	0.16	-0.26	9.8e-05	-0.46	3e-13	-0.41	6.9e-11
APOBEC2	black	0.37	8.9e-09	-0.37	8.9e-09	0.95	4.4e-119	0.28	1.5e-05	0.26	9.2e-05	-0.48	1.8e-14	-0.26	9.4e-05	0.0096	0.89	-0.21	0.0011	-0.28	1.8e-05	-0.32	1.1e-06	-0.28	2.1e-05
APOD	black	0.36	2.6e-08	-0.36	2.6e-08	0.53	9e-18	0.53	9.5e-18	0.39	7.3e-10	-0.64	4.3e-28	-0.43	1.9e-11	0.053	0.43	-0.053	0.42	-0.26	8.2e-05	-0.36	1.8e-08	-0.43	1.9e-11
ARMCX1	black	0.13	0.057	-0.13	0.057	0.55	9.4e-20	0.32	5.5e-07	-0.0057	0.93	-0.47	6.1e-14	0.065	0.33	0.51	1.4e-16	-0.2	0.002	-0.056	0.4	-0.27	4.1e-05	-0.16	0.013
ART3	black	0.33	2.8e-07	-0.33	2.8e-07	0.78	1.7e-47	0.21	0.0014	0.23	0.00057	-0.35	5.5e-08	-0.23	0.00052	-0.063	0.34	-0.14	0.034	-0.21	0.0011	-0.21	0.0017	-0.24	0.00029
ASB5	black	0.12	0.077	-0.12	0.077	0.9	1.4e-84	0.13	0.051	-0.017	0.8	-0.33	4e-07	0.014	0.84	0.28	2.5e-05	-0.14	0.039	-0.049	0.47	-0.14	0.039	-0.14	0.03
ATP1A2	black	0.42	2.8e-11	-0.42	2.8e-11	0.95	2.2e-114	0.34	1.5e-07	0.35	3.9e-08	-0.57	1.8e-21	-0.36	1.8e-08	0.0062	0.93	-0.19	0.0047	-0.33	4.8e-07	-0.4	2.9e-10	-0.36	3.4e-08
ATP1B4	black	0.11	0.084	-0.11	0.084	0.89	6.3e-78	0.1	0.13	0.0038	0.95	-0.35	5.4e-08	-0.022	0.74	0.23	0.0005	-0.14	0.035	-0.078	0.24	-0.15	0.027	-0.13	0.043
ATP2A1	black	0.38	3.1e-09	-0.38	3.1e-09	0.86	1.7e-66	0.27	3e-05	0.35	5e-08	-0.45	1.1e-12	-0.34	2e-07	-0.085	0.2	-0.17	0.0083	-0.29	8.2e-06	-0.3	5.6e-06	-0.26	9.5e-05
BIN1	black	0.04	0.55	-0.04	0.55	0.81	4.5e-55	0.076	0.25	-0.16	0.016	-0.36	2.3e-08	0.04	0.55	0.32	6e-07	0.13	0.046	0.14	0.039	0.033	0.62	-0.2	0.003
C10orf71	black	0.17	0.011	-0.17	0.011	0.84	4.8e-61	0.13	0.049	0.028	0.68	-0.32	1e-06	-0.095	0.15	0.094	0.16	-0.11	0.092	-0.12	0.068	-0.16	0.016	-0.19	0.0043
C14orf132	black	0.34	2e-07	-0.34	2e-07	0.56	5.3e-20	0.26	7.5e-05	0.33	3.1e-07	-0.52	4.7e-17	-0.4	5e-10	0.18	0.0072	-0.21	0.0012	-0.36	2.5e-08	-0.5	3.8e-16	-0.45	5.2e-13
C4orf54	black	0.28	1.7e-05	-0.28	1.7e-05	0.96	7.2e-125	0.22	0.00071	0.19	0.0042	-0.42	2.5e-11	-0.2	0.0024	0.079	0.23	-0.19	0.004	-0.23	0.00041	-0.27	3.8e-05	-0.24	0.0002
CA3	black	0.34	2.2e-07	-0.34	2.2e-07	0.89	2.7e-78	0.33	4.4e-07	0.28	2.4e-05	-0.49	2e-15	-0.3	4.8e-06	0.045	0.5	-0.17	0.011	-0.25	0.00018	-0.3	3e-06	-0.31	1.3e-06
CACNA1S	black	0.25	0.00012	-0.25	0.00012	0.92	3.8e-96	0.2	0.0026	0.15	0.024	-0.46	2.5e-13	-0.18	0.0055	0.089	0.18	-0.14	0.033	-0.18	0.0058	-0.24	0.00028	-0.24	0.00025
CACNA2D1	black	-0.076	0.25	0.076	0.25	0.53	9.7e-18	0.12	0.072	-0.18	0.0052	-0.14	0.035	-0.084	0.2	0.34	1.1e-07	0.096	0.15	0.14	0.037	-0.027	0.69	-0.4	2.5e-10
CACNB1	black	0.12	0.063	-0.12	0.063	0.91	8.2e-90	0.12	0.067	-0.0037	0.96	-0.39	6.3e-10	-0.0065	0.92	0.24	0.00034	-0.14	0.036	-0.07	0.29	-0.15	0.023	-0.12	0.06
CAP2	black	0.15	0.026	-0.15	0.026	0.8	7.5e-53	0.13	0.044	0.019	0.77	-0.36	2.5e-08	0.15	0.027	0.32	9.9e-07	-0.37	1.3e-08	-0.17	0.011	-0.24	0.00034	0.061	0.36
CAPN3	black	0.32	8.7e-07	-0.32	8.7e-07	0.76	2.1e-43	0.14	0.036	0.32	6.5e-07	-0.52	3.5e-17	-0.3	4.3e-06	-0.12	0.079	-0.073	0.28	-0.24	0.0002	-0.17	0.012	-0.15	0.021
CASQ1	black	0.38	4.1e-09	-0.38	4.1e-09	0.93	1.8e-100	0.31	1.8e-06	0.32	6e-07	-0.5	5.8e-16	-0.34	1.2e-07	-0.057	0.39	-0.18	0.0074	-0.3	4.2e-06	-0.33	3.2e-07	-0.31	1.4e-06
CASQ2	black	0.1	0.13	-0.1	0.13	0.88	9.3e-75	0.12	0.06	-0.014	0.83	-0.4	5.8e-10	0.038	0.57	0.33	2.6e-07	-0.16	0.016	-0.064	0.34	-0.15	0.021	-0.11	0.11
CAV3	black	0.27	3.6e-05	-0.27	3.6e-05	0.89	1.4e-78	0.19	0.0045	0.18	0.0075	-0.42	6.3e-11	-0.15	0.028	0.039	0.56	-0.23	0.0005	-0.25	0.00015	-0.24	0.00019	-0.15	0.02
CAVIN4	black	0.081	0.22	-0.081	0.22	0.88	1.2e-75	0.071	0.28	-0.066	0.32	-0.3	2.7e-06	0.078	0.24	0.32	1e-06	-0.13	0.053	0.0065	0.92	-0.079	0.23	-0.083	0.21
CD34	black	0.36	1.6e-08	-0.36	1.6e-08	0.57	2.2e-21	0.41	1.8e-10	0.44	3.1e-12	-0.73	5.2e-39	-0.46	3.5e-13	-0.0044	0.95	-0.11	0.096	-0.34	1.2e-07	-0.43	1.4e-11	-0.4	3.9e-10
CFL2	black	0.17	0.012	-0.17	0.012	0.82	8.8e-57	0.14	0.03	-0.038	0.57	-0.32	9.4e-07	0.019	0.77	0.31	2.4e-06	-0.084	0.21	-0.0085	0.9	-0.18	0.0067	-0.2	0.0021
CHGB	black	-0.18	0.0058	0.18	0.0058	0.33	3e-07	-0.075	0.26	-0.29	7e-06	0.026	0.7	0.35	7e-08	0.4	4.8e-10	-0.013	0.85	0.24	0.00022	0.12	0.061	0.14	0.036
CHRNA1	black	-0.22	0.00082	0.22	0.00082	0.54	1.9e-18	-0.14	0.037	-0.37	1.1e-08	-0.075	0.26	0.33	4.3e-07	0.55	4.3e-19	0.017	0.8	0.29	8.9e-06	0.17	0.0082	0.036	0.59
CILP	black	0.42	5.1e-11	-0.42	5.1e-11	0.69	1.7e-33	0.43	1.8e-11	0.44	2.2e-12	-0.71	1e-36	-0.46	1.7e-13	0.097	0.14	-0.16	0.018	-0.34	9.3e-08	-0.45	1.1e-12	-0.42	2.8e-11
CKM	black	0.34	1.8e-07	-0.34	1.8e-07	0.9	9.3e-86	0.28	1.8e-05	0.22	0.00063	-0.45	1.4e-12	-0.2	0.0027	0.097	0.14	-0.18	0.0065	-0.2	0.0021	-0.28	1.6e-05	-0.25	0.00012
CKMT2	black	0.34	1.5e-07	-0.34	1.5e-07	0.97	1.2e-137	0.27	3.7e-05	0.28	1.7e-05	-0.48	8.9e-15	-0.27	3.6e-05	0.016	0.81	-0.2	0.002	-0.29	6.3e-06	-0.33	2.3e-07	-0.26	6.7e-05
CMYA5	black	0.24	0.00023	-0.24	0.00023	0.94	1.3e-111	0.25	0.00018	0.15	0.024	-0.41	7.7e-11	-0.17	0.009	0.14	0.031	-0.18	0.0067	-0.18	0.0074	-0.27	2.6e-05	-0.25	0.00011
COQ10A	black	0.28	1.4e-05	-0.28	1.4e-05	0.76	2.2e-43	0.24	0.00021	0.19	0.0036	-0.36	1.9e-08	-0.42	2.7e-11	-0.081	0.22	0.13	0.045	-0.17	0.0092	-0.23	0.00045	-0.5	3.7e-16
COQ8A	black	0.39	1.2e-09	-0.39	1.2e-09	0.85	2.6e-65	0.32	6.6e-07	0.34	2.2e-07	-0.48	2.6e-14	-0.48	8.1e-15	-0.13	0.043	-0.035	0.6	-0.29	1.2e-05	-0.36	1.6e-08	-0.48	2.5e-14
CORO6	black	-0.082	0.22	0.082	0.22	0.74	1.9e-40	-0.014	0.84	-0.22	0.00071	-0.19	0.0033	0.3	5.7e-06	0.39	8.5e-10	-0.19	0.0035	0.076	0.25	0.054	0.42	0.12	0.083
COX6A2	black	0.38	2.4e-09	-0.38	2.4e-09	0.94	2.6e-111	0.25	0.00018	0.31	2.5e-06	-0.47	3.7e-14	-0.3	4e-06	-0.015	0.82	-0.19	0.0042	-0.3	5.7e-06	-0.35	7e-08	-0.28	1.4e-05
COX7A1	black	0.37	6.6e-09	-0.37	6.6e-09	0.85	1.3e-64	0.41	1.6e-10	0.35	8.3e-08	-0.69	4.6e-33	-0.32	1.1e-06	0.18	0.0075	-0.23	0.00057	-0.32	8.5e-07	-0.45	7.4e-13	-0.36	3.3e-08
CRYAB	black	0.39	1.7e-09	-0.39	1.7e-09	0.67	1.4e-30	0.25	0.00016	0.46	1.6e-13	-0.6	1e-23	-0.37	1.3e-08	-0.033	0.62	-0.2	0.0029	-0.4	3.2e-10	-0.43	7.5e-12	-0.22	0.00083
CSRP3	black	0.19	0.0034	-0.19	0.0034	0.89	2.7e-79	0.19	0.0042	0.078	0.24	-0.36	3.3e-08	-0.047	0.48	0.2	0.0023	-0.17	0.009	-0.11	0.1	-0.18	0.0058	-0.15	0.02
CUTC	black	0.18	0.0077	-0.18	0.0077	0.61	1.6e-24	0.035	0.59	0.11	0.1	-0.26	7.2e-05	-0.21	0.0012	-0.093	0.16	0.072	0.28	-0.098	0.14	-0.05	0.45	-0.17	0.012
CYSTM1	black	-0.05	0.45	0.05	0.45	0.54	7.5e-19	0.22	0.00073	-0.28	2.3e-05	-0.11	0.095	0.05	0.46	0.37	7.6e-09	0.0074	0.91	0.19	0.004	-0.074	0.26	-0.39	1.2e-09
DCLK1	black	0.25	0.00014	-0.25	0.00014	0.58	6.2e-22	0.29	1.1e-05	0.23	0.00049	-0.6	6.3e-24	-0.3	5.3e-06	0.32	9.9e-07	0.01	0.88	-0.12	0.077	-0.32	6.5e-07	-0.43	1.9e-11
DDIT4L	black	0.25	0.0001	-0.25	0.0001	0.87	4.3e-71	0.35	8e-08	0.21	0.0013	-0.51	2.5e-16	-0.19	0.0044	0.15	0.023	-0.2	0.0028	-0.23	0.00046	-0.29	1.1e-05	-0.24	0.00025
DES	black	0.17	0.012	-0.17	0.012	0.93	6.8e-99	0.17	0.012	0.037	0.58	-0.39	1.5e-09	-0.027	0.69	0.22	0.00072	-0.17	0.0094	-0.1	0.13	-0.18	0.0065	-0.15	0.02
DHRS7C	black	0.34	9.3e-08	-0.34	9.3e-08	0.8	3.3e-51	0.19	0.004	0.34	1.3e-07	-0.43	9.6e-12	-0.34	2.2e-07	-0.15	0.026	-0.16	0.014	-0.32	7.3e-07	-0.32	8.7e-07	-0.23	0.00044
DLK1	black	0.22	0.00063	-0.22	0.00063	0.66	2.7e-30	0.42	2.4e-11	0.28	1.5e-05	-0.54	8.7e-19	-0.35	6.9e-08	0.014	0.83	-0.14	0.033	-0.33	3.2e-07	-0.33	3.2e-07	-0.33	2.9e-07
DNAJA4	black	0.075	0.26	-0.075	0.26	0.47	9.7e-14	0.1	0.13	0.15	0.02	-0.11	0.11	-0.061	0.36	-0.13	0.056	-0.33	3.7e-07	-0.28	1.3e-05	-0.21	0.0018	0.066	0.32
DOK5	black	-0.042	0.53	0.042	0.53	0.72	3.2e-37	0.15	0.024	-0.17	0.012	-0.41	7.1e-11	0.086	0.19	0.56	4.3e-20	-0.094	0.16	0.11	0.088	-0.12	0.066	-0.21	0.0016
DUSP13	black	0.37	8.7e-09	-0.37	8.7e-09	0.89	6.3e-80	0.21	0.0012	0.35	6.6e-08	-0.46	1.3e-13	-0.3	2.9e-06	-0.082	0.22	-0.28	2.4e-05	-0.37	6.3e-09	-0.38	4e-09	-0.22	0.001
DUSP27	black	0.2	0.002	-0.2	0.002	0.94	4.6e-111	0.2	0.0031	0.074	0.27	-0.42	3e-11	-0.098	0.14	0.17	0.01	-0.13	0.059	-0.1	0.13	-0.16	0.015	-0.2	0.0027
EEF1A2	black	0.3	3.7e-06	-0.3	3.7e-06	0.88	1e-73	0.2	0.0021	0.2	0.0022	-0.42	2.9e-11	-0.15	0.027	0.06	0.36	-0.24	0.00029	-0.23	0.0004	-0.32	6e-07	-0.16	0.014
EFHD1	black	0.42	3.2e-11	-0.42	3.2e-11	0.52	5.6e-17	0.54	7.4e-19	0.37	6.6e-09	-0.58	5.9e-22	-0.43	1.5e-11	-0.017	0.8	-0.19	0.0047	-0.37	9.7e-09	-0.45	9.7e-13	-0.49	2.6e-15
EGF	black	0.13	0.044	-0.13	0.044	0.7	1.9e-34	0.5	4e-16	0.11	0.1	-0.39	9.8e-10	-0.16	0.016	0.052	0.43	-0.22	0.00081	-0.25	0.00011	-0.24	0.00023	-0.23	0.00045
EMCN	black	0.41	1.9e-10	-0.41	1.9e-10	0.58	3.5e-22	0.4	4.7e-10	0.44	1.9e-12	-0.7	6.3e-35	-0.46	2.1e-13	-0.023	0.73	-0.055	0.41	-0.27	3.1e-05	-0.4	3.1e-10	-0.4	2.5e-10
ENO3	black	0.41	1e-10	-0.41	1e-10	0.92	7.1e-96	0.27	2.9e-05	0.32	1.2e-06	-0.46	3.7e-13	-0.29	8.6e-06	-0.025	0.71	-0.21	0.0013	-0.31	1.4e-06	-0.34	1.8e-07	-0.28	2.4e-05
EPDR1	black	-0.025	0.71	0.025	0.71	0.6	9.4e-24	0.18	0.0061	-0.19	0.0044	-0.39	1.1e-09	0.059	0.37	0.62	6.5e-26	0.046	0.49	0.21	0.0016	-0.072	0.28	-0.27	2.9e-05
ESRRG	black	0.41	2e-10	-0.41	2e-10	0.65	4e-29	0.7	7e-35	0.26	6.4e-05	-0.45	8.7e-13	-0.34	1.5e-07	-0.092	0.16	-0.16	0.013	-0.3	5.2e-06	-0.34	9.6e-08	-0.44	5.8e-12
FABP3	black	0.18	0.0063	-0.18	0.0063	0.86	1.2e-68	0.15	0.024	0.081	0.23	-0.34	1.2e-07	-0.15	0.023	0.1	0.12	-0.11	0.1	-0.11	0.1	-0.2	0.003	-0.24	0.00031
FAM13C	black	0.34	1.4e-07	-0.34	1.4e-07	0.66	8.1e-30	0.33	2.3e-07	0.42	4.5e-11	-0.71	2e-36	-0.48	1.6e-14	0.046	0.49	0.0061	0.93	-0.28	2.2e-05	-0.37	8e-09	-0.43	9.5e-12
FBP2	black	0.38	2.2e-09	-0.38	2.2e-09	0.73	1.2e-39	0.2	0.0024	0.32	1e-06	-0.35	4.5e-08	-0.3	3.2e-06	-0.15	0.021	-0.19	0.0044	-0.29	8.3e-06	-0.3	4.1e-06	-0.23	0.00044
FBXO40	black	0.35	4.8e-08	-0.35	4.8e-08	0.86	2e-66	0.25	0.00012	0.28	1.8e-05	-0.44	3.3e-12	-0.29	1.1e-05	-0.094	0.16	-0.21	0.0016	-0.33	4.1e-07	-0.33	3.1e-07	-0.23	0.00046
FHL1	black	0.37	6.9e-09	-0.37	6.9e-09	0.89	1.6e-78	0.34	2.1e-07	0.31	2.1e-06	-0.57	3.6e-21	-0.27	3e-05	0.11	0.088	-0.17	0.0086	-0.29	7.8e-06	-0.4	3.7e-10	-0.3	5.3e-06
FILIP1	black	0.083	0.21	-0.083	0.21	0.76	1.7e-44	0.19	0.0048	-0.054	0.41	-0.33	2.4e-07	-0.087	0.19	0.35	4.5e-08	-0.0075	0.91	0.025	0.71	-0.19	0.005	-0.34	9.4e-08
FITM1	black	0.26	7.4e-05	-0.26	7.4e-05	0.89	2.1e-80	0.21	0.0012	0.19	0.0037	-0.42	6.1e-11	-0.23	0.00042	0.011	0.87	-0.15	0.022	-0.25	0.00011	-0.28	1.9e-05	-0.27	4.7e-05
FLNC	black	0.16	0.017	-0.16	0.017	0.91	3.6e-88	0.19	0.0034	0.058	0.39	-0.47	1e-13	-0.054	0.42	0.27	3.4e-05	-0.2	0.002	-0.15	0.019	-0.24	0.00023	-0.17	0.0099
FMC1	black	0.49	1.9e-15	-0.49	1.9e-15	0.5	1.3e-15	0.54	1.4e-18	0.47	4.8e-14	-0.51	1.1e-16	-0.5	6.6e-16	-0.24	0.00026	-0.17	0.013	-0.43	2e-11	-0.49	3.2e-15	-0.4	3.2e-10
FRMD3	black	0.26	5.4e-05	-0.26	5.4e-05	0.75	6.2e-43	0.28	1.6e-05	0.18	0.0055	-0.51	1.9e-16	-0.3	3.3e-06	0.0052	0.94	-0.032	0.63	-0.16	0.014	-0.21	0.0012	-0.33	2.5e-07
FRZB	black	0.37	8.7e-09	-0.37	8.7e-09	0.49	5.2e-15	0.24	0.00019	0.34	1.5e-07	-0.53	5.2e-18	-0.62	1.5e-25	-0.17	0.0095	0.39	6.4e-10	-0.13	0.05	-0.21	0.0018	-0.61	7e-25
FXYD1	black	0.43	1.5e-11	-0.43	1.5e-11	0.86	1.8e-67	0.42	2.6e-11	0.41	9e-11	-0.71	1.6e-36	-0.45	6e-13	0.015	0.82	-0.14	0.033	-0.36	2.4e-08	-0.45	1.7e-12	-0.45	1.4e-12
GDF10	black	0.19	0.0038	-0.19	0.0038	0.57	9.8e-21	0.25	0.00013	0.35	8e-08	-0.62	3.4e-25	-0.41	1.9e-10	0.012	0.86	-0.033	0.62	-0.3	4.5e-06	-0.33	2.4e-07	-0.3	3.7e-06
GMPR	black	0.15	0.022	-0.15	0.022	0.64	1.1e-27	0.38	1.8e-09	0.054	0.42	-0.33	2.3e-07	-0.15	0.025	0.083	0.21	-0.12	0.062	-0.065	0.33	-0.036	0.59	-0.29	1.2e-05
GNG11	black	0.29	1.2e-05	-0.29	1.2e-05	0.55	1.2e-19	0.32	6e-07	0.24	0.0002	-0.67	1e-30	-0.18	0.0081	0.25	0.00014	-0.15	0.024	-0.2	0.0029	-0.35	7.4e-08	-0.24	0.00026
GRB14	black	0.29	5.9e-06	-0.29	5.9e-06	0.77	1.4e-45	0.21	0.0018	0.2	0.0023	-0.27	4.4e-05	-0.18	0.0078	-0.042	0.53	-0.26	7.3e-05	-0.28	1.3e-05	-0.33	2.9e-07	-0.18	0.0055
GYG1	black	-0.045	0.5	0.045	0.5	0.57	2.2e-21	0.21	0.0015	-0.17	0.012	-0.19	0.0043	0.084	0.2	0.21	0.0012	-0.035	0.6	0.12	0.064	0.084	0.21	-0.079	0.23
H19	black	0.34	1.5e-07	-0.34	1.5e-07	0.52	7.4e-17	0.27	3.3e-05	0.3	3.1e-06	-0.37	5.2e-09	-0.26	6.5e-05	0.045	0.5	-0.16	0.013	-0.33	2.6e-07	-0.43	8.4e-12	-0.28	1.8e-05
HHATL	black	0.26	8.5e-05	-0.26	8.5e-05	0.93	3.6e-98	0.21	0.0016	0.15	0.022	-0.42	5.6e-11	-0.16	0.013	0.064	0.33	-0.17	0.012	-0.19	0.0034	-0.24	0.00025	-0.21	0.0017
HJV	black	0.23	0.00046	-0.23	0.00046	0.95	2.9e-118	0.19	0.0036	0.14	0.039	-0.41	8.7e-11	-0.17	0.012	0.097	0.14	-0.12	0.072	-0.17	0.012	-0.21	0.0016	-0.23	0.00043
HRC	black	0.24	0.00025	-0.24	0.00025	0.94	1.7e-106	0.19	0.0042	0.15	0.022	-0.46	2.3e-13	-0.18	0.0071	0.096	0.15	-0.17	0.012	-0.19	0.0045	-0.22	0.00072	-0.22	0.00073
HSPB2	black	0.36	2.6e-08	-0.36	2.6e-08	0.91	1.3e-89	0.32	6.4e-07	0.3	5.7e-06	-0.6	1.3e-23	-0.29	1.2e-05	0.12	0.063	-0.22	0.0011	-0.29	5.9e-06	-0.38	3.1e-09	-0.31	1.4e-06
HSPB3	black	-0.07	0.29	0.07	0.29	0.71	6.9e-37	0.062	0.35	-0.17	0.0088	-0.24	0.00024	0.26	8.6e-05	0.39	1.2e-09	-0.2	0.0019	0.047	0.48	0.017	0.8	0.13	0.056
HSPB6	black	0.3	3.5e-06	-0.3	3.5e-06	0.9	1.6e-85	0.28	2.2e-05	0.3	5.7e-06	-0.55	9.9e-20	-0.34	1e-07	-0.012	0.86	-0.12	0.074	-0.29	6.4e-06	-0.33	2.3e-07	-0.33	2.8e-07
HSPB7	black	0.16	0.015	-0.16	0.015	0.93	1.1e-101	0.12	0.078	0.066	0.32	-0.36	2e-08	-0.061	0.36	0.18	0.0078	-0.16	0.014	-0.1	0.12	-0.19	0.005	-0.14	0.036
IL17D	black	0.54	8.9e-19	-0.54	8.9e-19	0.79	2.3e-49	0.39	1e-09	0.49	6.4e-15	-0.61	5.8e-25	-0.47	5.6e-14	-0.12	0.079	-0.24	0.00028	-0.46	1.2e-13	-0.52	3.4e-17	-0.39	7.6e-10
IP6K3	black	-0.021	0.76	0.021	0.76	0.72	1.5e-37	0.036	0.59	-0.14	0.031	-0.19	0.0045	0.12	0.075	0.31	1.5e-06	-0.051	0.44	0.073	0.27	-0.043	0.52	-0.057	0.39
ITGA7	black	0.086	0.19	-0.086	0.19	0.73	1.2e-39	0.16	0.015	0.013	0.85	-0.46	1.4e-13	-0.026	0.7	0.28	1.7e-05	-0.15	0.028	-0.083	0.21	-0.23	0.0006	-0.15	0.029
ITGB1BP2	black	0.14	0.033	-0.14	0.033	0.79	1.4e-49	0.0068	0.92	0.051	0.44	-0.27	3.2e-05	-0.046	0.49	0.14	0.04	-0.14	0.034	-0.096	0.15	-0.13	0.046	-0.087	0.19
JPH1	black	-0.0085	0.9	0.0085	0.9	0.6	1.6e-23	0.13	0.049	-0.056	0.4	-0.073	0.27	-0.032	0.63	0.16	0.014	-0.14	0.031	-0.046	0.49	-0.14	0.036	-0.19	0.0043
KBTBD12	black	0.19	0.0042	-0.19	0.0042	0.72	1.4e-37	0.18	0.0076	0.096	0.15	-0.23	0.00035	-0.21	0.0016	0.012	0.86	-0.099	0.14	-0.17	0.012	-0.2	0.0023	-0.27	4e-05
KLHL40	black	0.32	7.1e-07	-0.32	7.1e-07	0.88	7.2e-77	0.2	0.0028	0.24	0.00031	-0.41	1.9e-10	-0.23	0.00054	-0.035	0.6	-0.19	0.0045	-0.26	9.3e-05	-0.28	1.9e-05	-0.22	0.00064
KLHL41	black	0.29	7.6e-06	-0.29	7.6e-06	0.9	1.1e-84	0.26	6.1e-05	0.17	0.011	-0.41	8e-11	-0.14	0.03	0.16	0.015	-0.18	0.0074	-0.16	0.015	-0.26	6.8e-05	-0.23	0.00036
LDB3	black	0.39	1e-09	-0.39	1e-09	0.95	1.1e-120	0.3	5.5e-06	0.31	1.4e-06	-0.56	2.6e-20	-0.34	2.2e-07	-0.022	0.74	-0.19	0.0047	-0.32	6.3e-07	-0.36	1.9e-08	-0.31	1.2e-06
LIMCH1	black	0.32	6.8e-07	-0.32	6.8e-07	0.67	5.7e-31	0.44	4.8e-12	0.31	2.3e-06	-0.61	2.2e-24	-0.21	0.0012	0.066	0.32	-0.3	3.5e-06	-0.37	9.9e-09	-0.39	1.2e-09	-0.17	0.0098
LINC01405	black	0.24	0.00028	-0.24	0.00028	0.85	4.4e-64	0.16	0.014	0.17	0.011	-0.4	2.3e-10	-0.21	0.0011	0.02	0.77	-0.11	0.1	-0.18	0.007	-0.19	0.0039	-0.22	0.00068
LMOD2	black	0.25	0.00011	-0.25	0.00011	0.95	1.9e-115	0.18	0.006	0.17	0.0084	-0.44	5.1e-12	-0.18	0.0077	0.1	0.13	-0.16	0.017	-0.21	0.0018	-0.25	0.00012	-0.21	0.0015
LMOD3	black	0.21	0.0015	-0.21	0.0015	0.95	6.4e-113	0.18	0.0062	0.13	0.053	-0.39	8.9e-10	-0.15	0.025	0.087	0.19	-0.14	0.038	-0.16	0.013	-0.2	0.0025	-0.2	0.0025
LOC285095	black	0.38	2.1e-09	-0.38	2.1e-09	0.7	1.7e-35	0.14	0.032	0.29	8.7e-06	-0.32	8.4e-07	-0.32	8.5e-07	-0.18	0.0069	-0.17	0.01	-0.32	7.9e-07	-0.33	4.9e-07	-0.26	7.4e-05
LPL	black	-0.0085	0.9	0.0085	0.9	0.55	8.8e-20	0.23	0.00035	-0.093	0.16	-0.34	1e-07	0.04	0.55	0.42	4.7e-11	-0.097	0.14	0.096	0.15	-0.14	0.034	-0.14	0.037
LRRC2	black	0.33	2.8e-07	-0.33	2.8e-07	0.88	2.1e-75	0.22	0.00062	0.24	0.00031	-0.48	1.7e-14	-0.32	1.2e-06	-0.00081	0.99	-0.067	0.31	-0.22	0.00083	-0.28	2.3e-05	-0.35	6.6e-08
LRRC39	black	0.15	0.02	-0.15	0.02	0.91	5.6e-86	0.13	0.057	0.031	0.65	-0.35	4.4e-08	-0.079	0.24	0.16	0.017	-0.13	0.043	-0.12	0.078	-0.17	0.01	-0.19	0.0045
LRRN4CL	black	0.49	2.9e-15	-0.49	2.9e-15	0.63	1.1e-26	0.46	1.7e-13	0.55	1.2e-19	-0.74	4.4e-41	-0.55	1.2e-19	-0.034	0.61	-0.15	0.025	-0.43	6.4e-12	-0.52	3.1e-17	-0.46	1.4e-13
LYVE1	black	0.66	7.1e-30	-0.66	7.1e-30	0.57	2.5e-21	0.42	3.6e-11	0.57	2.4e-21	-0.6	7.5e-24	-0.44	2.4e-12	-0.15	0.022	-0.23	0.00035	-0.4	5.3e-10	-0.57	7.5e-21	-0.34	1.9e-07
MAP3K7CL	black	-0.052	0.43	0.052	0.43	0.6	6.1e-24	-0.011	0.87	-0.28	1.2e-05	-0.14	0.033	0.31	2.4e-06	0.41	8e-11	-0.14	0.042	0.097	0.15	-0.021	0.75	0.048	0.47
MB	black	0.33	3.9e-07	-0.33	3.9e-07	0.89	5.3e-80	0.33	2.7e-07	0.23	0.00048	-0.46	2.4e-13	-0.22	0.001	0.1	0.13	-0.17	0.012	-0.2	0.0025	-0.3	4.8e-06	-0.28	2.2e-05
MEF2C	black	0.17	0.0095	-0.17	0.0095	0.68	3e-32	0.096	0.15	-0.01	0.88	-0.43	1.8e-11	-0.23	0.00047	0.23	0.00047	0.42	2.2e-11	0.13	0.055	-0.075	0.26	-0.47	1.1e-13
MEOX2	black	0.49	2.2e-15	-0.49	2.2e-15	0.57	2.4e-21	0.33	4.5e-07	0.45	1.4e-12	-0.63	1e-26	-0.58	3.9e-22	-0.0019	0.98	0.12	0.078	-0.28	1.5e-05	-0.49	3.6e-15	-0.61	6.8e-25
MFAP5	black	0.049	0.46	-0.049	0.46	0.53	3.4e-18	0.18	0.0063	-0.045	0.5	-0.38	4.8e-09	0.097	0.15	0.52	2.3e-17	-0.18	0.0051	-0.044	0.51	-0.19	0.0034	-0.11	0.088
MIR133A1HG	black	0.27	3.3e-05	-0.27	3.3e-05	0.85	2.3e-65	0.21	0.0015	0.22	0.00084	-0.38	2.4e-09	-0.25	0.00012	-0.018	0.79	-0.15	0.021	-0.23	0.00038	-0.28	2.4e-05	-0.25	0.0001
MITF	black	0.19	0.0049	-0.19	0.0049	0.63	1.5e-26	0.34	1.2e-07	0.11	0.099	-0.48	2.1e-14	-0.28	1.7e-05	0.36	1.9e-08	0.027	0.69	0.017	0.79	-0.26	6.8e-05	-0.52	5e-17
MLIP	black	0.31	1.7e-06	-0.31	1.7e-06	0.82	9.2e-56	0.21	0.0018	0.36	3.1e-08	-0.51	1.4e-16	-0.26	6.4e-05	-0.076	0.25	-0.25	0.00013	-0.34	1.5e-07	-0.29	7.6e-06	-0.096	0.15
MRLN	black	0.26	5.8e-05	-0.26	5.8e-05	0.94	5.3e-111	0.2	0.0019	0.2	0.0027	-0.45	1.5e-12	-0.23	0.00045	0.037	0.58	-0.13	0.052	-0.21	0.0014	-0.22	0.00079	-0.25	0.00016
MTURN	black	0.19	0.0035	-0.19	0.0035	0.57	3e-21	0.6	2.5e-23	0.072	0.28	-0.36	1.6e-08	-0.02	0.77	0.16	0.019	-0.41	1.5e-10	-0.36	2e-08	-0.46	4.3e-13	-0.15	0.026
MUSTN1	black	0.17	0.01	-0.17	0.01	0.85	3.8e-66	0.18	0.0079	0.098	0.14	-0.47	4.9e-14	-0.12	0.078	0.23	0.00058	-0.11	0.09	-0.11	0.095	-0.2	0.0025	-0.21	0.0012
MYBPC1	black	0.3	3.4e-06	-0.3	3.4e-06	0.9	4.1e-83	0.26	9.2e-05	0.18	0.0081	-0.41	7e-11	-0.24	0.00034	0.099	0.13	-0.083	0.21	-0.15	0.028	-0.24	0.00027	-0.34	2.1e-07
MYBPC2	black	0.15	0.023	-0.15	0.023	0.84	7.4e-63	0.15	0.02	0.032	0.63	-0.3	3.2e-06	-0.027	0.69	0.21	0.0014	-0.13	0.055	-0.069	0.3	-0.14	0.041	-0.15	0.025
MYBPH	black	-0.13	0.055	0.13	0.055	0.63	4e-27	-0.064	0.34	-0.22	0.001	-0.19	0.004	0.24	0.00027	0.4	2.4e-10	-0.085	0.2	0.12	0.075	0.061	0.36	0.069	0.3
MYF6	black	0.16	0.013	-0.16	0.013	0.92	9.4e-94	0.14	0.04	0.03	0.66	-0.35	4.5e-08	0.0022	0.97	0.22	0.0008	-0.18	0.0069	-0.09	0.18	-0.16	0.014	-0.11	0.11
MYH1	black	0.051	0.44	-0.051	0.44	0.71	2e-36	0.13	0.046	-0.082	0.22	-0.24	0.00024	0.091	0.17	0.33	5e-07	-0.11	0.11	0.026	0.69	-0.06	0.37	-0.087	0.19
MYH2	black	0.33	3.1e-07	-0.33	3.1e-07	0.86	8.5e-67	0.29	1.1e-05	0.23	0.00058	-0.41	6.7e-11	-0.21	0.0017	0.1	0.13	-0.18	0.007	-0.21	0.0014	-0.29	6.5e-06	-0.26	5.9e-05
MYH3	black	-0.098	0.14	0.098	0.14	0.64	3.4e-28	-0.037	0.57	-0.18	0.0068	-0.22	0.00071	0.19	0.0036	0.46	3.1e-13	-0.08	0.23	0.11	0.1	0.042	0.53	-0.0075	0.91
MYH6	black	0.34	1.6e-07	-0.34	1.6e-07	0.93	4e-103	0.22	0.00073	0.24	0.00021	-0.48	1.3e-14	-0.27	3.7e-05	0.02	0.76	-0.14	0.037	-0.23	0.00036	-0.27	3e-05	-0.28	2.3e-05
MYH7	black	0.34	1.8e-07	-0.34	1.8e-07	0.93	3.2e-98	0.22	0.00085	0.23	0.00045	-0.44	2.1e-12	-0.26	9.6e-05	0.032	0.63	-0.17	0.0085	-0.25	0.00017	-0.29	9.7e-06	-0.28	1.2e-05
MYH8	black	0.12	0.063	-0.12	0.063	0.74	1.8e-41	0.19	0.0043	0.053	0.42	-0.42	6.6e-11	-0.059	0.37	0.25	0.00018	-0.11	0.11	-0.073	0.27	-0.12	0.077	-0.16	0.016
MYL1	black	0.25	0.00012	-0.25	0.00012	0.87	2.7e-72	0.23	0.00039	0.13	0.042	-0.41	1.8e-10	-0.11	0.097	0.19	0.0035	-0.16	0.017	-0.13	0.042	-0.23	0.00057	-0.21	0.0017
MYL2	black	0.18	0.0067	-0.18	0.0067	0.87	1.4e-71	0.15	0.028	0.055	0.41	-0.36	3.5e-08	-0.065	0.33	0.22	0.00081	-0.12	0.066	-0.085	0.2	-0.19	0.0048	-0.19	0.0044
MYL3	black	0.36	3.6e-08	-0.36	3.6e-08	0.89	6.6e-81	0.25	0.00018	0.28	2.2e-05	-0.48	7.5e-15	-0.29	1.1e-05	-0.037	0.57	-0.2	0.0022	-0.31	2e-06	-0.33	3.5e-07	-0.27	3.5e-05
MYL6B	black	0.19	0.0042	-0.19	0.0042	0.82	1.5e-55	0.1	0.13	0.11	0.099	-0.31	1.2e-06	-0.21	0.0013	0.1	0.13	-0.11	0.11	-0.2	0.0022	-0.24	0.00019	-0.33	2.9e-07
MYLPF	black	0.26	9.3e-05	-0.26	9.3e-05	0.88	2e-73	0.22	0.00078	0.15	0.022	-0.41	8.7e-11	-0.1	0.12	0.18	0.0051	-0.21	0.0014	-0.18	0.0054	-0.25	0.00018	-0.17	0.0083
MYO18B	black	0.14	0.039	-0.14	0.039	0.88	5.1e-75	0.14	0.039	0.014	0.84	-0.34	2.1e-07	-0.016	0.81	0.17	0.012	-0.18	0.0066	-0.12	0.077	-0.17	0.011	-0.098	0.14
MYOC	black	0.66	3.1e-30	-0.66	3.1e-30	0.65	1.4e-28	0.54	1.8e-18	0.57	6e-21	-0.59	8.4e-23	-0.55	1.9e-19	-0.27	3.3e-05	-0.21	0.0013	-0.51	2.1e-16	-0.55	2e-19	-0.44	2e-12
MYOM1	black	0.35	4.4e-08	-0.35	4.4e-08	0.95	7.3e-121	0.27	3.3e-05	0.23	0.00037	-0.47	5.3e-14	-0.27	3.6e-05	0.004	0.95	-0.17	0.0088	-0.27	5e-05	-0.32	8.7e-07	-0.29	6.1e-06
MYOM2	black	0.27	3.7e-05	-0.27	3.7e-05	0.87	2.9e-71	0.23	0.00059	0.19	0.0047	-0.39	1.3e-09	-0.18	0.0072	-0.007	0.92	-0.19	0.004	-0.23	0.00048	-0.25	0.00013	-0.17	0.01
MYOM3	black	0.087	0.19	-0.087	0.19	0.81	3.5e-54	0.073	0.27	-0.052	0.43	-0.29	7.9e-06	0.13	0.043	0.21	0.0011	-0.25	0.00012	-0.086	0.2	-0.061	0.36	0.057	0.4
MYOT	black	0.3	3.9e-06	-0.3	3.9e-06	0.97	8.2e-140	0.27	2.9e-05	0.19	0.0047	-0.46	1.9e-13	-0.19	0.0051	0.13	0.059	-0.17	0.009	-0.2	0.003	-0.28	1.7e-05	-0.26	8.2e-05
MYOZ1	black	0.38	2.8e-09	-0.38	2.8e-09	0.95	2.8e-112	0.28	1.5e-05	0.33	3.7e-07	-0.51	1.3e-16	-0.31	1.5e-06	-0.028	0.67	-0.19	0.0042	-0.3	5.4e-06	-0.34	1.5e-07	-0.27	2.9e-05
MYOZ2	black	0.094	0.16	-0.094	0.16	0.91	2.4e-86	0.086	0.2	0.0029	0.96	-0.34	1.4e-07	-0.051	0.45	0.2	0.0019	-0.089	0.18	-0.059	0.38	-0.14	0.032	-0.17	0.012
NEB	black	0.23	0.00052	-0.23	0.00052	0.91	6.9e-88	0.21	0.0016	0.12	0.079	-0.4	3.7e-10	-0.12	0.072	0.18	0.0068	-0.18	0.0079	-0.15	0.025	-0.24	0.00025	-0.2	0.0021
NES	black	-0.18	0.0062	0.18	0.0062	0.57	6e-21	-0.0029	0.96	-0.33	3.3e-07	-0.13	0.05	0.29	6.6e-06	0.52	2e-17	-0.14	0.033	0.16	0.014	0.056	0.4	0.0085	0.9
NEXN	black	-0.09	0.18	0.09	0.18	0.76	8.9e-45	0.068	0.31	-0.27	4.9e-05	-0.28	2e-05	0.24	0.00029	0.55	4.6e-19	-0.015	0.82	0.24	0.0003	0.11	0.11	-0.044	0.51
NIPSNAP3B	black	0.36	3e-08	-0.36	3e-08	0.74	1.9e-41	0.23	0.0005	0.22	0.00063	-0.36	2.4e-08	-0.38	3.6e-09	-0.075	0.26	0.035	0.6	-0.21	0.0015	-0.29	7e-06	-0.46	3.2e-13
NMRK2	black	0.23	0.00045	-0.23	0.00045	0.85	5.3e-66	0.14	0.03	0.16	0.015	-0.36	2.2e-08	-0.15	0.027	0.0077	0.91	-0.21	0.0017	-0.24	0.00026	-0.23	0.00044	-0.13	0.045
NPY6R	black	0.25	0.00011	-0.25	0.00011	0.85	1.7e-65	0.16	0.015	0.18	0.0077	-0.37	7.7e-09	-0.19	0.0038	0.0054	0.94	-0.16	0.015	-0.23	0.00058	-0.26	9.7e-05	-0.19	0.0039
NRAP	black	0.31	1.9e-06	-0.31	1.9e-06	0.93	5.3e-98	0.24	0.00021	0.23	0.00057	-0.4	5.3e-10	-0.21	0.0017	0.02	0.77	-0.21	0.0015	-0.24	0.00024	-0.29	9.2e-06	-0.2	0.002
PCOLCE2	black	0.31	2.1e-06	-0.31	2.1e-06	0.47	1.1e-13	0.25	0.00019	0.23	0.00058	-0.25	0.00015	-0.35	6.5e-08	-0.11	0.11	-0.14	0.038	-0.29	7.9e-06	-0.4	3.4e-10	-0.39	1.3e-09
PDE4DIP	black	0.11	0.098	-0.11	0.098	0.93	3.2e-101	0.13	0.044	-0.034	0.61	-0.38	2.1e-09	-0.026	0.7	0.28	1.3e-05	-0.08	0.23	0.01	0.88	-0.13	0.051	-0.19	0.0037
PDK4	black	0.13	0.051	-0.13	0.051	0.59	2.5e-22	0.22	0.00096	0.08	0.23	-0.39	1.3e-09	-0.08	0.23	0.24	0.00022	0.0023	0.97	0.06	0.37	-0.13	0.045	-0.18	0.0064
PDLIM3	black	0.22	0.00081	-0.22	0.00081	0.87	1.3e-72	0.23	0.00044	0.032	0.64	-0.39	1.5e-09	-0.12	0.077	0.29	7.8e-06	-0.05	0.45	-0.054	0.42	-0.23	0.0004	-0.36	2.5e-08
PEBP4	black	0.46	2.5e-13	-0.46	2.5e-13	0.83	3.7e-59	0.34	1.5e-07	0.42	6.4e-11	-0.49	4.9e-15	-0.4	2.4e-10	-0.16	0.013	-0.22	0.00099	-0.4	3.6e-10	-0.4	3.4e-10	-0.31	1.3e-06
PFKM	black	0.15	0.026	-0.15	0.026	0.78	6.3e-48	0.15	0.02	0.13	0.047	-0.32	1.1e-06	-0.1	0.12	0.081	0.23	-0.26	9.6e-05	-0.27	4.9e-05	-0.27	3.1e-05	-0.093	0.16
PGAM2	black	0.46	2.2e-13	-0.46	2.2e-13	0.89	3.6e-80	0.31	2.1e-06	0.4	4.1e-10	-0.5	6.6e-16	-0.38	2.3e-09	-0.12	0.062	-0.19	0.0049	-0.34	1.1e-07	-0.36	2.3e-08	-0.31	1.4e-06
PGM1	black	0.42	4.7e-11	-0.42	4.7e-11	0.53	7.7e-18	0.4	5.3e-10	0.31	2.4e-06	-0.37	1.2e-08	-0.27	5e-05	-0.033	0.62	-0.31	2.2e-06	-0.38	3.3e-09	-0.44	3.9e-12	-0.32	1e-06
PHKA1	black	0.33	4.3e-07	-0.33	4.3e-07	0.55	1e-19	0.36	3.4e-08	0.4	3.1e-10	-0.33	3.2e-07	-0.29	8.3e-06	-0.22	0.00076	-0.36	1.4e-08	-0.44	4.6e-12	-0.43	9.2e-12	-0.11	0.09
PHYH	black	0.3	5.6e-06	-0.3	5.6e-06	0.68	3.1e-32	0.39	1e-09	0.2	0.0024	-0.53	2.9e-18	-0.24	0.00027	0.2	0.0024	-0.16	0.013	-0.21	0.0015	-0.38	2e-09	-0.35	5.2e-08
PKIA	black	0.35	5e-08	-0.35	5e-08	0.77	7.2e-46	0.24	0.00034	0.29	9.1e-06	-0.36	1.5e-08	-0.46	2.1e-13	-0.076	0.25	0.028	0.67	-0.23	0.00035	-0.32	6.4e-07	-0.54	5.6e-19
PLN	black	0.42	2.2e-11	-0.42	2.2e-11	0.93	2.8e-102	0.35	8.9e-08	0.3	3.1e-06	-0.55	1.1e-19	-0.33	4e-07	0.075	0.26	-0.15	0.02	-0.27	4.7e-05	-0.39	8.2e-10	-0.38	3e-09
PLPP7	black	0.096	0.15	-0.096	0.15	0.83	4e-60	0.16	0.013	-0.0074	0.91	-0.49	4.2e-15	0.003	0.96	0.4	3.1e-10	-0.17	0.012	-0.052	0.44	-0.17	0.0092	-0.14	0.029
PPDPFL	black	0.42	5.5e-11	-0.42	5.5e-11	0.79	2.2e-50	0.31	1.8e-06	0.35	8.9e-08	-0.43	1.6e-11	-0.37	6.5e-09	-0.14	0.03	-0.2	0.0026	-0.37	9.6e-09	-0.37	5.7e-09	-0.32	1.1e-06
PPP1R1A	black	0.5	9.8e-16	-0.5	9.8e-16	0.84	6.1e-63	0.3	4e-06	0.43	6.9e-12	-0.49	6.5e-15	-0.41	1.5e-10	-0.18	0.0062	-0.23	0.00046	-0.39	7.5e-10	-0.4	3.5e-10	-0.32	1.1e-06
PPP1R3A	black	0.34	2.1e-07	-0.34	2.1e-07	0.87	5.1e-70	0.25	0.00014	0.26	6.9e-05	-0.42	5.3e-11	-0.29	7.8e-06	-0.054	0.42	-0.17	0.012	-0.28	1.3e-05	-0.31	2e-06	-0.29	1.2e-05
PRKAA2	black	0.49	4.7e-15	-0.49	4.7e-15	0.77	9.4e-46	0.6	4.5e-24	0.42	5.9e-11	-0.46	1.3e-13	-0.46	3.5e-13	-0.11	0.11	-0.29	9.3e-06	-0.43	6.4e-12	-0.54	1.6e-18	-0.51	3.2e-16
PRUNE2	black	0.038	0.57	-0.038	0.57	0.78	2.4e-48	0.13	0.045	-0.1	0.12	-0.34	1.3e-07	0.069	0.3	0.42	3.1e-11	-0.069	0.3	0.039	0.56	-0.12	0.079	-0.16	0.014
PWWP3B	black	0.035	0.6	-0.035	0.6	0.62	1.7e-25	0.12	0.079	-0.058	0.39	-0.2	0.0025	0.062	0.35	0.26	5.3e-05	-0.15	0.026	-0.036	0.59	-0.15	0.021	-0.097	0.15
PYGM	black	0.49	6.5e-15	-0.49	6.5e-15	0.9	7.3e-83	0.35	4.4e-08	0.44	4.5e-12	-0.55	3.6e-19	-0.43	7e-12	-0.14	0.041	-0.18	0.0065	-0.38	3.1e-09	-0.4	2.5e-10	-0.36	3.3e-08
RBFOX1	black	0.31	1.4e-06	-0.31	1.4e-06	0.92	6.9e-96	0.25	0.00018	0.23	0.00046	-0.49	5.8e-15	-0.23	0.00042	0.01	0.88	-0.23	0.00051	-0.29	1e-05	-0.31	1.7e-06	-0.22	0.00064
RBM24	black	0.14	0.04	-0.14	0.04	0.91	5.4e-87	0.15	0.023	0.005	0.94	-0.37	6.2e-09	-0.019	0.77	0.31	1.4e-06	-0.12	0.07	-0.05	0.45	-0.18	0.0064	-0.19	0.0046
RCAN2	black	0.4	4.6e-10	-0.4	4.6e-10	0.7	3.3e-35	0.33	4.1e-07	0.33	3e-07	-0.7	5.1e-35	-0.4	3.5e-10	0.24	0.00033	-0.031	0.64	-0.23	0.00039	-0.41	1.2e-10	-0.48	1.6e-14
REL	black	-0.3	4.3e-06	0.3	4.3e-06	-0.5	4.2e-16	-0.29	8e-06	-0.4	2.9e-10	0.46	1.8e-13	0.31	1.8e-06	0.058	0.38	0.36	2.8e-08	0.43	1.2e-11	0.42	2.9e-11	0.18	0.0053
RPL3L	black	0.23	0.00053	-0.23	0.00053	0.78	5.6e-48	0.17	0.0082	0.14	0.035	-0.29	7.4e-06	-0.076	0.25	0.023	0.72	-0.29	6.7e-06	-0.26	7e-05	-0.25	0.00014	-0.06	0.36
RTN2	black	0.16	0.015	-0.16	0.015	0.88	1.9e-76	0.26	5.6e-05	0.04	0.55	-0.46	1.5e-13	-0.034	0.6	0.26	7.8e-05	-0.21	0.0011	-0.13	0.055	-0.23	0.00039	-0.18	0.0068
RYR1	black	0.11	0.095	-0.11	0.095	0.65	1.7e-28	0.22	0.0007	0.092	0.16	-0.09	0.18	-0.19	0.0031	-0.024	0.72	-0.21	0.0014	-0.21	0.0018	-0.24	0.00023	-0.27	4.1e-05
S100A1	black	0.2	0.0019	-0.2	0.0019	0.8	6e-53	0.51	1.2e-16	0.14	0.037	-0.51	1.9e-16	-0.16	0.015	0.14	0.041	-0.22	0.00085	-0.24	0.00033	-0.3	4e-06	-0.27	3.7e-05
SCN1B	black	0.17	0.012	-0.17	0.012	0.82	4.3e-57	0.24	0.0002	0.033	0.62	-0.48	8.5e-15	-0.071	0.29	0.31	2.2e-06	-0.13	0.053	-0.042	0.52	-0.23	0.0006	-0.24	0.00023
SEMA3G	black	0.48	1.4e-14	-0.48	1.4e-14	0.57	3.2e-21	0.43	9.7e-12	0.55	3e-19	-0.71	2.3e-36	-0.59	3.6e-23	-0.17	0.013	-0.066	0.32	-0.4	5.3e-10	-0.45	1.6e-12	-0.46	2.6e-13
SGCD	black	-0.05	0.45	0.05	0.45	0.71	5.7e-36	0.12	0.083	-0.17	0.0085	-0.4	3.5e-10	0.16	0.018	0.67	1.6e-31	-0.15	0.023	0.066	0.32	-0.15	0.027	-0.12	0.066
SGCG	black	0.21	0.0012	-0.21	0.0012	0.94	1.1e-105	0.17	0.0092	0.15	0.023	-0.44	2.8e-12	-0.16	0.018	0.13	0.047	-0.2	0.0019	-0.21	0.0013	-0.25	0.00012	-0.19	0.0045
SH3BGR	black	0.26	7e-05	-0.26	7e-05	0.93	6.9e-98	0.26	6.6e-05	0.16	0.017	-0.37	6.2e-09	-0.21	0.0014	0.08	0.23	-0.19	0.0036	-0.23	0.00038	-0.31	1.9e-06	-0.3	5.8e-06
SLC25A4	black	0.46	1.4e-13	-0.46	1.4e-13	0.81	2e-53	0.38	4.4e-09	0.4	3.1e-10	-0.35	4.6e-08	-0.47	4.6e-14	-0.24	0.00033	-0.24	0.00028	-0.44	3e-12	-0.48	1.4e-14	-0.44	2.7e-12
SLCO5A1	black	0.18	0.0063	-0.18	0.0063	0.76	1.9e-43	0.084	0.2	0.0053	0.94	-0.29	7.7e-06	-0.21	0.0013	0.049	0.46	0.17	0.011	0.029	0.67	-0.059	0.38	-0.37	1.2e-08
SLN	black	0.22	0.001	-0.22	0.001	0.89	8.5e-79	0.2	0.0027	0.087	0.19	-0.38	4.7e-09	-0.088	0.18	0.21	0.0014	-0.15	0.02	-0.1	0.13	-0.2	0.0026	-0.21	0.0015
SMPX	black	0.19	0.0049	-0.19	0.0049	0.91	3.5e-87	0.21	0.0014	0.083	0.21	-0.39	8.1e-10	-0.064	0.34	0.22	0.0011	-0.15	0.023	-0.11	0.098	-0.18	0.0059	-0.17	0.0097
SMTNL1	black	0.42	2.9e-11	-0.42	2.9e-11	0.86	8.7e-69	0.28	2e-05	0.36	2.7e-08	-0.48	1.3e-14	-0.36	1.8e-08	-0.14	0.039	-0.21	0.0015	-0.35	7.1e-08	-0.34	1.6e-07	-0.29	6.8e-06
SMTNL2	black	0.33	4.2e-07	-0.33	4.2e-07	0.85	2.7e-66	0.17	0.0082	0.28	1.5e-05	-0.46	2.1e-13	-0.3	5.3e-06	-0.047	0.48	-0.1	0.12	-0.24	0.00021	-0.29	1.1e-05	-0.25	0.00013
SMYD1	black	0.33	4.7e-07	-0.33	4.7e-07	0.94	7.1e-104	0.24	0.00032	0.27	4.3e-05	-0.48	1.3e-14	-0.25	0.00015	-0.012	0.86	-0.22	0.001	-0.28	1.8e-05	-0.3	4.7e-06	-0.21	0.0015
SPARCL1	black	0.3	3.8e-06	-0.3	3.8e-06	0.57	4.7e-21	0.39	1.3e-09	0.25	0.00014	-0.66	1.8e-30	-0.42	2.9e-11	0.21	0.0016	0.17	0.0095	-0.082	0.22	-0.33	4e-07	-0.58	7.2e-22
SRL	black	0.24	0.00031	-0.24	0.00031	0.85	3.2e-66	0.19	0.0035	0.16	0.018	-0.39	1.5e-09	-0.21	0.0018	0.067	0.32	-0.16	0.018	-0.23	0.00042	-0.26	7.8e-05	-0.25	0.00014
SSPN	black	0.14	0.029	-0.14	0.029	0.57	4.1e-21	0.25	0.00017	-0.083	0.21	-0.43	1.1e-11	-0.074	0.26	0.53	3.9e-18	0.1	0.13	0.089	0.18	-0.14	0.03	-0.43	6.3e-12
STAC3	black	0.21	0.0019	-0.21	0.0019	0.92	1.3e-91	0.16	0.019	0.11	0.095	-0.39	8.9e-10	-0.14	0.031	0.076	0.25	-0.1	0.12	-0.12	0.078	-0.14	0.032	-0.19	0.0041
STRIT1	black	0.31	2.5e-06	-0.31	2.5e-06	0.87	4.7e-73	0.27	3.8e-05	0.22	0.001	-0.45	5.4e-13	-0.28	2.5e-05	-0.021	0.75	-0.16	0.014	-0.26	8.1e-05	-0.27	3.3e-05	-0.3	5.7e-06
SYNC	black	-0.037	0.58	0.037	0.58	0.67	2.7e-31	0.2	0.0024	-0.25	0.00014	-0.21	0.0016	0.27	4.8e-05	0.53	8.9e-18	-0.26	7.6e-05	0.043	0.52	-0.16	0.015	-0.035	0.6
SYNM	black	0.36	1.4e-08	-0.36	1.4e-08	0.81	6.7e-55	0.46	1.9e-13	0.25	0.00017	-0.41	1.9e-10	-0.31	1.5e-06	-0.032	0.63	-0.16	0.018	-0.29	7.4e-06	-0.34	1.4e-07	-0.38	2.4e-09
SYNPO2	black	0.28	1.8e-05	-0.28	1.8e-05	0.75	2.8e-43	0.28	2.3e-05	0.18	0.0052	-0.45	5.4e-13	-0.41	1.1e-10	0.078	0.24	0.11	0.097	-0.12	0.067	-0.27	4.6e-05	-0.59	6.8e-23
SYNPO2L	black	0.37	8.2e-09	-0.37	8.2e-09	0.89	4.5e-81	0.24	0.00032	0.3	5.2e-06	-0.5	5.3e-16	-0.25	0.00011	-0.0076	0.91	-0.21	0.0012	-0.29	6.2e-06	-0.34	9.1e-08	-0.21	0.0014
SYPL2	black	0.24	0.00026	-0.24	0.00026	0.87	6.3e-71	0.22	0.001	0.2	0.002	-0.46	1.9e-13	-0.24	0.00033	-0.0077	0.91	-0.15	0.021	-0.24	0.00025	-0.26	8.1e-05	-0.23	0.0005
TBX15	black	0.052	0.43	-0.052	0.43	0.8	9.3e-52	0.068	0.31	-0.11	0.087	-0.27	2.7e-05	0.065	0.33	0.34	1.1e-07	-0.11	0.084	-0.002	0.98	-0.081	0.22	-0.12	0.061
TCAP	black	0.3	4.7e-06	-0.3	4.7e-06	0.96	2.1e-126	0.24	0.00026	0.2	0.002	-0.46	2.3e-13	-0.21	0.0014	0.045	0.5	-0.18	0.0055	-0.23	0.00038	-0.27	2.8e-05	-0.23	0.00035
TCEAL7	black	0.047	0.48	-0.047	0.48	0.63	4e-26	0.25	0.00012	-0.055	0.41	-0.45	1.4e-12	0.023	0.73	0.58	3.1e-22	-0.15	0.026	-0.046	0.49	-0.28	2.5e-05	-0.25	0.00016
THBS4	black	-0.17	0.011	0.17	0.011	0.61	5.9e-25	0.13	0.049	-0.19	0.0042	-0.32	9.2e-07	0.079	0.24	0.57	8.9e-21	-0.018	0.79	0.12	0.071	-0.04	0.55	-0.19	0.0045
TMEM182	black	0.16	0.019	-0.16	0.019	0.87	1.5e-71	0.18	0.0058	0.033	0.62	-0.24	0.0002	-0.064	0.34	0.13	0.054	-0.21	0.0013	-0.18	0.006	-0.23	0.00056	-0.18	0.0056
TMEM38A	black	0.42	5.6e-11	-0.42	5.6e-11	0.85	5.4e-64	0.24	0.00024	0.35	4.5e-08	-0.44	2e-12	-0.4	4.1e-10	-0.18	0.0052	-0.16	0.015	-0.36	2e-08	-0.34	1.2e-07	-0.34	1.4e-07
TMEM52	black	0.28	2.2e-05	-0.28	2.2e-05	0.64	4.6e-28	0.18	0.0074	0.3	3.1e-06	-0.33	2.2e-07	-0.32	9.2e-07	-0.16	0.014	-0.18	0.0052	-0.32	6.1e-07	-0.33	5.2e-07	-0.22	0.00086
TMOD1	black	0.39	1.6e-09	-0.39	1.6e-09	0.91	4.9e-90	0.29	6.4e-06	0.31	2.6e-06	-0.5	4.1e-16	-0.33	4.5e-07	-0.013	0.84	-0.15	0.02	-0.28	2.4e-05	-0.36	3.4e-08	-0.32	6.2e-07
TNNC1	black	0.26	5.7e-05	-0.26	5.7e-05	0.9	2.9e-81	0.21	0.0013	0.14	0.04	-0.41	1e-10	-0.11	0.1	0.18	0.0057	-0.19	0.0046	-0.15	0.02	-0.24	0.0002	-0.2	0.0023
TNNC2	black	0.34	1.4e-07	-0.34	1.4e-07	0.89	2.2e-78	0.28	1.6e-05	0.25	0.00011	-0.49	6e-15	-0.24	0.00033	0.095	0.15	-0.16	0.015	-0.22	0.001	-0.29	1.2e-05	-0.26	5.7e-05
TNNI1	black	0.16	0.015	-0.16	0.015	0.89	1.4e-78	0.12	0.079	0.022	0.74	-0.34	1.4e-07	-8.5e-05	1	0.27	3.3e-05	-0.16	0.015	-0.071	0.29	-0.17	0.012	-0.14	0.039
TNNI2	black	0.37	5.9e-09	-0.37	5.9e-09	0.88	1.7e-75	0.26	6.3e-05	0.3	5.8e-06	-0.48	8.3e-15	-0.25	0.00012	0.026	0.69	-0.2	0.0021	-0.26	5.8e-05	-0.32	8.7e-07	-0.25	0.00015
TNNT1	black	0.1	0.12	-0.1	0.12	0.83	4.6e-58	0.1	0.12	-0.012	0.86	-0.3	5.1e-06	0.054	0.41	0.21	0.0011	-0.22	0.00064	-0.1	0.12	-0.15	0.022	-0.032	0.63
TNNT3	black	0.2	0.0021	-0.2	0.0021	0.89	6.3e-79	0.18	0.0053	0.13	0.043	-0.41	8.8e-11	-0.12	0.083	0.16	0.014	-0.14	0.031	-0.15	0.02	-0.21	0.0016	-0.17	0.01
TNS2	black	0.31	1.4e-06	-0.31	1.4e-06	0.61	6.6e-25	0.42	4.6e-11	0.32	5.6e-07	-0.74	3.2e-40	-0.42	3.6e-11	0.16	0.019	-0.023	0.74	-0.21	0.0014	-0.4	2.1e-10	-0.47	3.2e-14
TPM2	black	0.15	0.027	-0.15	0.027	0.9	1.7e-84	0.22	0.00098	-0.018	0.79	-0.4	5.8e-10	0.032	0.63	0.37	1.2e-08	-0.21	0.0016	-0.081	0.22	-0.21	0.0014	-0.18	0.0078
TPM3	black	0.23	0.00043	-0.23	0.00043	0.89	8.1e-80	0.13	0.042	0.073	0.27	-0.34	9.1e-08	-0.074	0.26	0.095	0.15	-0.17	0.0096	-0.12	0.069	-0.18	0.0076	-0.15	0.022
TRDN	black	0.26	8.9e-05	-0.26	8.9e-05	0.96	2.6e-133	0.23	0.00039	0.16	0.014	-0.42	6.6e-11	-0.18	0.0074	0.1	0.12	-0.16	0.016	-0.18	0.0054	-0.26	9.1e-05	-0.24	0.00032
TRIM63	black	0.11	0.097	-0.11	0.097	0.8	1.5e-52	0.11	0.084	-0.041	0.54	-0.32	9e-07	0.054	0.42	0.31	1.7e-06	-0.12	0.077	-0.01	0.88	-0.15	0.021	-0.1	0.12
TRIM72	black	0.19	0.0043	-0.19	0.0043	0.84	5.1e-62	0.11	0.1	0.1	0.12	-0.31	1.5e-06	-0.13	0.058	0.041	0.53	-0.17	0.012	-0.19	0.0042	-0.2	0.0028	-0.14	0.039
TTN	black	0.29	8.5e-06	-0.29	8.5e-06	0.95	4.9e-117	0.24	0.00021	0.18	0.0053	-0.45	1.6e-12	-0.19	0.0033	0.11	0.098	-0.14	0.033	-0.18	0.006	-0.28	1.4e-05	-0.26	7.8e-05
TXLNB	black	0.25	0.00013	-0.25	0.00013	0.93	1.3e-97	0.18	0.0054	0.1	0.12	-0.4	4e-10	-0.22	0.00083	0.089	0.18	0.011	0.87	-0.09	0.18	-0.18	0.0073	-0.33	4.6e-07
UNC45B	black	0.23	0.00036	-0.23	0.00036	0.96	4.6e-126	0.18	0.0065	0.15	0.025	-0.43	1.6e-11	-0.15	0.028	0.14	0.037	-0.16	0.018	-0.17	0.0096	-0.23	0.00044	-0.2	0.0029
USP13	black	0.2	0.0029	-0.2	0.0029	0.86	4e-67	0.23	0.00039	0.044	0.5	-0.32	7.2e-07	-0.18	0.0077	0.16	0.017	-0.15	0.02	-0.17	0.0093	-0.31	1.4e-06	-0.36	1.5e-08
VPS72	black	0.14	0.032	-0.14	0.032	0.92	7.1e-96	0.15	0.026	0.057	0.39	-0.33	2.5e-07	-0.083	0.21	0.11	0.096	-0.19	0.0038	-0.18	0.0071	-0.17	0.0087	-0.15	0.027
XIRP1	black	0.075	0.26	-0.075	0.26	0.84	2.6e-61	0.079	0.24	-0.065	0.33	-0.31	2.6e-06	0.048	0.47	0.23	0.00046	-0.13	0.043	-0.005	0.94	-0.076	0.25	-0.1	0.13
XIRP2	black	0.19	0.0037	-0.19	0.0037	0.9	1.1e-82	0.18	0.0053	0.09	0.18	-0.35	4e-08	-0.12	0.067	0.17	0.012	-0.15	0.023	-0.14	0.03	-0.23	0.00051	-0.22	0.00075
ZBTB16	black	0.11	0.095	-0.11	0.095	0.51	1.7e-16	0.24	0.00029	0.053	0.42	-0.42	6.2e-11	-0.097	0.14	0.23	0.00036	0.037	0.57	0.045	0.5	-0.16	0.014	-0.2	0.0023
ZFPM2	black	0.063	0.35	-0.063	0.35	0.53	1.1e-17	0.11	0.11	-0.11	0.087	-0.28	2.3e-05	-0.031	0.64	0.5	4e-16	0.092	0.16	0.095	0.15	-0.15	0.022	-0.38	3.7e-09
ZNF106	black	0.2	0.0031	-0.2	0.0031	0.86	8.5e-67	0.23	0.00037	0.077	0.24	-0.38	2.3e-09	-0.24	0.00029	0.15	0.027	-0.04	0.54	-0.15	0.021	-0.28	1.9e-05	-0.38	2.1e-09
A2M-AS1	blue	0.16	0.017	-0.16	0.017	0.2	0.0023	0.085	0.2	0.023	0.73	-0.4	2.5e-10	-0.35	4.8e-08	0.1	0.13	0.67	2e-31	0.25	0.00013	0.087	0.19	-0.53	6e-18
ACSL5	blue	0.011	0.87	-0.011	0.87	-0.12	0.08	-0.17	0.0082	-0.014	0.84	-0.031	0.64	-0.22	0.00074	-0.21	0.0012	0.65	8.7e-29	0.39	1.7e-09	0.5	9.1e-16	-0.2	0.002
ADA2	blue	-0.2	0.0027	0.2	0.0027	-0.12	0.06	-0.11	0.094	-0.18	0.0068	-0.066	0.32	-0.23	0.0006	0.055	0.41	0.87	6.3e-73	0.56	3.3e-20	0.43	1.1e-11	-0.39	9.2e-10
ADAM28	blue	-0.0073	0.91	0.0073	0.91	-0.22	0.001	0.022	0.74	-0.13	0.042	0.082	0.22	-0.27	4.8e-05	-0.062	0.35	0.8	1e-51	0.38	3.7e-09	0.22	0.00097	-0.51	1.7e-16
ADAMDEC1	blue	-0.46	1.8e-13	0.46	1.8e-13	-0.32	6.4e-07	-0.35	4.4e-08	-0.5	4.4e-16	0.33	4.1e-07	0.2	0.0024	0.23	0.00049	0.75	1.1e-41	0.74	1.7e-40	0.65	1.9e-28	-0.043	0.52
ADGRE5	blue	-0.28	2.5e-05	0.28	2.5e-05	-0.025	0.71	-0.2	0.0024	-0.46	1.3e-13	0.044	0.51	0.19	0.0038	0.28	2.2e-05	0.64	4.7e-28	0.72	3.7e-38	0.51	2.7e-16	-0.13	0.046
AHNAK2	blue	-0.0021	0.97	0.0021	0.97	0.092	0.17	-0.079	0.23	0.14	0.032	-0.098	0.14	0.31	1.7e-06	0.1	0.12	-0.57	3.5e-21	-0.32	6.9e-07	-0.18	0.0057	0.59	8.9e-23
AICDA	blue	0.22	0.00067	-0.22	0.00067	-0.093	0.16	-0.063	0.34	0.032	0.63	0.029	0.66	-0.23	0.00041	-0.16	0.018	0.48	9e-15	0.068	0.31	-0.044	0.51	-0.29	9.5e-06
ALOX5AP	blue	-0.16	0.015	0.16	0.015	-0.18	0.0079	-0.26	5.3e-05	-0.35	4.9e-08	0.13	0.049	0.079	0.23	0.2	0.0025	0.72	4.1e-37	0.74	5e-41	0.44	1.9e-12	-0.19	0.0038
ANKRD36BP2	blue	-0.11	0.11	0.11	0.11	-0.21	0.0016	-0.038	0.57	-0.11	0.11	0.08	0.23	-0.29	1.2e-05	-0.1	0.12	0.72	8.5e-38	0.29	8.1e-06	0.21	0.0017	-0.42	3.2e-11
ANKRD44	blue	0.092	0.16	-0.092	0.16	-0.095	0.15	-0.13	0.054	-0.024	0.71	-0.13	0.055	-0.34	1.3e-07	-0.045	0.5	0.91	1.6e-88	0.47	8.6e-14	0.28	2.1e-05	-0.47	4.3e-14
ANXA2R	blue	-0.018	0.78	0.018	0.78	-0.062	0.35	-0.26	6.1e-05	-0.061	0.36	-0.081	0.22	-0.2	0.0026	-0.078	0.24	0.63	4.4e-27	0.28	1.7e-05	0.25	0.00011	-0.2	0.0024
AOAH	blue	-0.31	2.6e-06	0.31	2.6e-06	-0.17	0.0083	-0.36	2.7e-08	-0.39	1.1e-09	0.13	0.059	0.12	0.069	0.18	0.0054	0.78	5.5e-48	0.76	5e-44	0.64	2.4e-27	-0.07	0.29
APOBEC3C	blue	-0.15	0.02	0.15	0.02	-0.27	4.3e-05	-0.23	0.00042	-0.31	2.6e-06	0.33	3.4e-07	-0.065	0.33	-0.017	0.79	0.69	1.4e-33	0.56	3.9e-20	0.55	3.2e-19	-0.33	2.8e-07
APOBEC3G	blue	-0.15	0.027	0.15	0.027	-0.14	0.029	-0.19	0.0038	-0.24	0.00019	0.18	0.0073	-0.15	0.023	-0.026	0.7	0.75	1.8e-42	0.53	1.1e-17	0.56	4.7e-20	-0.37	5.2e-09
APOL3	blue	-0.01	0.88	0.01	0.88	0.027	0.68	-0.15	0.02	0.023	0.72	-0.11	0.085	-0.25	0.00018	-0.19	0.0039	0.59	2e-22	0.32	6e-07	0.54	6.5e-19	-0.18	0.0068
ARHGAP9	blue	-0.1	0.13	0.1	0.13	-0.16	0.018	-0.29	7.4e-06	-0.2	0.0028	-0.0035	0.96	-0.15	0.019	-0.0085	0.9	0.94	9.5e-111	0.61	6.5e-25	0.45	9.2e-13	-0.3	2.8e-06
ARHGDIB	blue	0.08	0.23	-0.08	0.23	-0.052	0.44	-0.11	0.093	-0.038	0.57	-0.14	0.032	-0.34	1.8e-07	-0.055	0.4	0.88	9.5e-77	0.46	1.4e-13	0.27	3e-05	-0.5	1.3e-15
ARHGEF6	blue	0.037	0.57	-0.037	0.57	0.16	0.014	-0.055	0.41	-0.062	0.35	-0.29	7.1e-06	-0.33	3.4e-07	0.11	0.095	0.87	8e-71	0.45	7.6e-13	0.25	0.00013	-0.52	5e-17
ARL6IP5	blue	0.26	9.2e-05	-0.26	9.2e-05	0.3	5.4e-06	0.31	1.8e-06	0.091	0.17	-0.37	5.7e-09	-0.48	1.3e-14	0.04	0.55	0.58	1.3e-21	0.21	0.0016	-0.044	0.51	-0.73	2.4e-39
ATP2A3	blue	0.21	0.0014	-0.21	0.0014	0.082	0.22	0.52	2.9e-17	0.11	0.1	-0.35	6.2e-08	-0.44	3.1e-12	-0.17	0.01	0.56	2.3e-20	0.055	0.41	-0.073	0.27	-0.59	7.7e-23
ATP8A1	blue	0.33	2.7e-07	-0.33	2.7e-07	0.15	0.02	0.21	0.0013	0.2	0.0029	-0.36	1.6e-08	-0.52	5.4e-17	-0.19	0.0039	0.69	3.3e-34	0.13	0.047	-0.011	0.87	-0.59	3.5e-23
BACH2	blue	0.091	0.17	-0.091	0.17	0.043	0.52	-0.12	0.079	-0.17	0.012	-0.073	0.28	-0.083	0.21	0.22	0.00072	0.52	6.7e-17	0.21	0.0014	-0.038	0.57	-0.36	2e-08
BANK1	blue	0.18	0.0075	-0.18	0.0075	-0.12	0.064	-0.083	0.21	0.051	0.45	-0.035	0.59	-0.36	2.4e-08	-0.24	0.00025	0.78	1.1e-48	0.18	0.0074	0.081	0.22	-0.44	5.7e-12
BDKRB2	blue	0.2	0.0027	-0.2	0.0027	0.19	0.004	0.11	0.11	0.43	1.5e-11	-0.33	2.4e-07	-0.018	0.79	-0.15	0.025	-0.57	1.9e-21	-0.48	1.3e-14	-0.34	2e-07	0.37	1.2e-08
BHLHA15	blue	0.027	0.69	-0.027	0.69	-0.038	0.57	0.39	1.8e-09	0.005	0.94	-0.17	0.0097	-0.34	2.1e-07	-0.099	0.14	0.51	1.9e-16	0.12	0.07	-0.0035	0.96	-0.49	6.2e-15
BIN2	blue	-0.082	0.22	0.082	0.22	-0.14	0.04	-0.16	0.019	-0.18	0.0055	-0.035	0.6	-0.21	0.0015	-0.028	0.68	0.92	1.1e-95	0.59	1.1e-22	0.42	6.4e-11	-0.38	4.5e-09
BIRC3	blue	-0.25	0.00012	0.25	0.00012	-0.25	0.00017	-0.22	0.0011	-0.41	1.2e-10	0.25	0.00013	0.094	0.16	0.079	0.24	0.69	4.7e-33	0.6	4e-24	0.49	2.2e-15	-0.17	0.0092
BLK	blue	0.17	0.012	-0.17	0.012	-0.19	0.0044	-0.1	0.12	0.052	0.44	-0.026	0.69	-0.28	1.5e-05	-0.23	0.00049	0.71	1.9e-36	0.17	0.0092	0.098	0.14	-0.31	1.7e-06
BMS1P20	blue	-0.02	0.76	0.02	0.76	-0.15	0.022	0.094	0.16	-0.077	0.25	-0.02	0.77	-0.25	0.00014	-0.063	0.34	0.64	4e-28	0.23	0.00048	0.14	0.037	-0.41	6.9e-11
BTK	blue	0.0069	0.92	-0.0069	0.92	-0.12	0.077	-0.17	0.011	-0.081	0.22	-0.11	0.088	-0.28	1.7e-05	-0.046	0.49	0.9	1.3e-84	0.46	2.8e-13	0.28	2.3e-05	-0.39	1.7e-09
BTLA	blue	0.063	0.34	-0.063	0.34	-0.14	0.037	-0.12	0.066	-0.021	0.75	-0.085	0.2	-0.3	5.4e-06	-0.17	0.0087	0.86	6.3e-69	0.36	2.2e-08	0.28	1.4e-05	-0.34	2.1e-07
BTN3A1	blue	-0.31	2.6e-06	0.31	2.6e-06	-0.16	0.018	-0.28	1.7e-05	-0.37	5.2e-09	0.1	0.13	0.021	0.75	0.095	0.15	0.75	1.8e-42	0.56	7.8e-20	0.69	1.3e-33	-0.16	0.017
BTN3A2	blue	-0.21	0.0014	0.21	0.0014	-0.11	0.089	-0.24	0.00034	-0.28	1.3e-05	0.099	0.14	0.05	0.46	0.036	0.59	0.58	1.6e-21	0.44	4e-12	0.56	3.3e-20	-0.053	0.43
BTN3A3	blue	-0.37	8.7e-09	0.37	8.7e-09	-0.13	0.046	-0.36	3.4e-08	-0.38	2.4e-09	0.13	0.046	0.11	0.095	0.16	0.018	0.67	1.1e-30	0.57	8.3e-21	0.75	2.7e-43	-0.019	0.77
C16orf54	blue	-0.03	0.65	0.03	0.65	-0.12	0.065	-0.072	0.28	-0.12	0.066	-0.077	0.25	-0.23	0.00044	-0.025	0.7	0.9	3.7e-85	0.5	4.1e-16	0.36	3.5e-08	-0.41	1.3e-10
C1orf162	blue	-0.24	0.0003	0.24	0.0003	-0.023	0.73	-0.27	3.5e-05	-0.4	3.6e-10	-0.0089	0.89	0.14	0.038	0.32	8.1e-07	0.75	8.9e-42	0.8	1.5e-51	0.57	8.2e-21	-0.12	0.065
C3	blue	0.16	0.014	-0.16	0.014	0.24	0.00022	0.25	0.00013	-0.004	0.95	-0.31	2.6e-06	-0.33	2.8e-07	0.14	0.031	0.57	4e-21	0.28	1.9e-05	0.03	0.65	-0.63	3.9e-26
C7	blue	0.42	3.7e-11	-0.42	3.7e-11	0.12	0.07	0.23	0.00056	0.28	2.1e-05	-0.34	1.8e-07	-0.52	6.4e-17	-0.23	0.0006	0.51	2.2e-16	-0.083	0.21	-0.23	0.00057	-0.57	4.4e-21
CALHM6	blue	-0.37	5.4e-09	0.37	5.4e-09	-0.27	5e-05	-0.48	1.2e-14	-0.5	1.2e-15	0.37	5.8e-09	0.27	5e-05	0.14	0.041	0.67	1.2e-30	0.73	1.1e-38	0.78	7.6e-49	0.079	0.24
CARD8-AS1	blue	-0.029	0.66	0.029	0.66	-0.059	0.37	-0.21	0.0013	-0.19	0.0047	-0.097	0.15	-0.055	0.41	0.15	0.024	0.76	8.2e-44	0.53	4.2e-18	0.32	1.1e-06	-0.25	0.00014
CCDC69	blue	0.25	0.00011	-0.25	0.00011	0.31	2.4e-06	0.1	0.12	0.22	0.00088	-0.49	4.7e-15	-0.48	1.1e-14	-0.13	0.057	0.66	7.3e-30	0.16	0.014	-0.0024	0.97	-0.5	1.4e-15
CCL19	blue	0.11	0.1	-0.11	0.1	0.06	0.37	0.046	0.49	0.073	0.27	-0.24	0.0002	-0.4	2.6e-10	-0.095	0.15	0.76	1.1e-44	0.24	0.00028	0.14	0.039	-0.5	8.7e-16
CCL5	blue	-0.33	4e-07	0.33	4e-07	-0.2	0.002	-0.3	3.2e-06	-0.39	1.6e-09	0.22	0.00088	0.12	0.075	0.095	0.15	0.65	5.6e-29	0.66	9.3e-30	0.74	7.1e-41	-0.073	0.27
CCND3	blue	-0.067	0.31	0.067	0.31	-0.03	0.65	-0.066	0.32	-0.23	0.00048	-0.1	0.12	-0.071	0.28	0.17	0.011	0.7	1.8e-34	0.46	4.2e-13	0.31	1.8e-06	-0.32	5.3e-07
CCR2	blue	0.019	0.77	-0.019	0.77	0.0076	0.91	-0.082	0.21	-0.025	0.71	-0.2	0.002	-0.23	0.00048	0.043	0.52	0.68	2.1e-32	0.47	1.1e-13	0.28	1.3e-05	-0.31	2.1e-06
CCR5	blue	-0.16	0.016	0.16	0.016	-0.12	0.063	-0.21	0.0016	-0.18	0.0063	-0.0014	0.98	-0.18	0.0076	0.017	0.8	0.8	1e-51	0.6	4.3e-24	0.56	4.3e-20	-0.31	2.3e-06
CCR6	blue	0.11	0.087	-0.11	0.087	-0.23	0.00047	-0.17	0.0093	-0.062	0.35	0.0054	0.94	-0.22	0.00084	-0.13	0.049	0.8	2.4e-52	0.33	2.5e-07	0.2	0.0028	-0.33	2.8e-07
CCR7	blue	-0.19	0.0033	0.19	0.0033	-0.25	0.00011	-0.3	3.9e-06	-0.29	7.8e-06	0.11	0.094	0.014	0.84	0.027	0.69	0.89	4.8e-79	0.6	8.8e-24	0.52	7.4e-17	-0.13	0.051
CD180	blue	0.089	0.18	-0.089	0.18	-0.14	0.03	-0.12	0.069	-0.059	0.38	-0.025	0.71	-0.27	3.5e-05	-0.12	0.064	0.83	4.9e-60	0.37	1.2e-08	0.18	0.0057	-0.41	2e-10
CD19	blue	0.22	0.00091	-0.22	0.00091	-0.11	0.11	-0.073	0.27	0.12	0.069	-0.071	0.28	-0.43	1.4e-11	-0.31	1.9e-06	0.77	1.5e-45	0.12	0.068	0.04	0.54	-0.45	5.4e-13
CD2	blue	-0.17	0.0091	0.17	0.0091	-0.17	0.0088	-0.27	3.8e-05	-0.19	0.0045	0.048	0.47	-0.19	0.0039	-0.02	0.77	0.91	9.6e-90	0.57	4.4e-21	0.54	9e-19	-0.31	2.5e-06
CD200	blue	-0.12	0.067	0.12	0.067	-0.044	0.5	-0.041	0.54	-0.31	1.7e-06	0.031	0.64	-0.078	0.24	0.26	5.6e-05	0.55	1.5e-19	0.45	1.2e-12	0.2	0.0021	-0.46	1.8e-13
CD22	blue	0.25	0.0001	-0.25	0.0001	-0.12	0.065	-0.11	0.093	0.085	0.2	-0.042	0.53	-0.35	3.6e-08	-0.27	3.5e-05	0.69	3.6e-33	0.093	0.16	0.00011	1	-0.4	4.9e-10
CD247	blue	-0.12	0.072	0.12	0.072	-0.16	0.013	-0.25	0.00014	-0.17	0.0083	0.0079	0.91	-0.18	0.006	-0.04	0.55	0.92	1e-93	0.56	7.7e-20	0.49	6.5e-15	-0.3	4.1e-06
CD27	blue	-0.092	0.16	0.092	0.16	-0.16	0.015	-0.027	0.68	-0.08	0.23	-0.062	0.35	-0.32	6.7e-07	-0.099	0.14	0.87	1.9e-70	0.36	2.2e-08	0.28	1.6e-05	-0.44	3.4e-12
CD37	blue	-0.095	0.15	0.095	0.15	-0.21	0.0014	-0.25	0.0001	-0.22	0.00093	0.06	0.36	-0.13	0.047	0.0055	0.93	0.92	4.9e-95	0.57	7.3e-21	0.39	7.4e-10	-0.32	1.2e-06
CD38	blue	-0.28	1.6e-05	0.28	1.6e-05	-0.29	1.2e-05	-0.22	0.00073	-0.37	7.7e-09	0.23	0.00049	0.08	0.23	0.08	0.23	0.67	1.1e-30	0.57	5.7e-21	0.47	1.2e-13	-0.13	0.052
CD3D	blue	-0.099	0.14	0.099	0.14	-0.19	0.0047	-0.25	0.0001	-0.15	0.028	0.041	0.54	-0.25	0.00017	-0.12	0.083	0.93	1.8e-98	0.5	5.9e-16	0.49	2.8e-15	-0.35	6.4e-08
CD3E	blue	-0.13	0.042	0.13	0.042	-0.19	0.0038	-0.24	0.00031	-0.15	0.022	0.0031	0.96	-0.18	0.0061	-0.052	0.44	0.85	5.4e-65	0.49	3.2e-15	0.46	4.5e-13	-0.28	1.7e-05
CD3G	blue	-0.11	0.09	0.11	0.09	-0.19	0.0038	-0.26	6.7e-05	-0.17	0.012	0.081	0.22	-0.12	0.065	-0.035	0.6	0.78	4.1e-47	0.51	2.4e-16	0.48	2e-14	-0.2	0.0026
CD48	blue	-0.016	0.81	0.016	0.81	-0.16	0.013	-0.22	0.001	-0.12	0.077	-0.03	0.65	-0.25	0.00017	-0.11	0.099	0.94	2.1e-104	0.47	8.2e-14	0.38	2.1e-09	-0.36	2.5e-08
CD52	blue	0.015	0.82	-0.015	0.82	-0.14	0.032	-0.16	0.016	-0.056	0.4	-0.048	0.47	-0.33	4.4e-07	-0.087	0.19	0.93	1.7e-102	0.47	3.2e-14	0.35	8.2e-08	-0.44	3.9e-12
CD53	blue	-0.16	0.017	0.16	0.017	-0.23	0.00048	-0.27	3.2e-05	-0.3	3.3e-06	0.069	0.3	-0.041	0.53	0.092	0.17	0.94	2.7e-111	0.69	1.5e-33	0.49	5.2e-15	-0.24	0.0002
CD69	blue	-0.34	2e-07	0.34	2e-07	-0.29	8.7e-06	-0.29	5.9e-06	-0.42	2.2e-11	0.19	0.0039	0.21	0.0015	0.21	0.0015	0.72	1.6e-37	0.73	7.9e-39	0.56	1.3e-20	-0.013	0.84
CD72	blue	0.11	0.11	-0.11	0.11	-0.19	0.004	-0.18	0.0076	-0.12	0.081	0.017	0.8	-0.16	0.018	-0.068	0.31	0.78	4.2e-47	0.41	7.9e-11	0.24	0.0003	-0.29	8.9e-06
CD74	blue	-0.27	3.4e-05	0.27	3.4e-05	-0.092	0.16	-0.25	0.00011	-0.32	7.2e-07	0.058	0.38	-0.023	0.73	0.15	0.028	0.75	2.4e-42	0.66	4.6e-30	0.6	1.1e-23	-0.23	0.00044
CD79A	blue	0.022	0.74	-0.022	0.74	-0.17	0.01	0.025	0.71	-0.021	0.76	-0.045	0.5	-0.38	4.9e-09	-0.17	0.0086	0.79	1.6e-50	0.23	0.00055	0.12	0.069	-0.5	4.5e-16
CD83	blue	-0.051	0.44	0.051	0.44	-0.27	2.9e-05	-0.12	0.065	-0.21	0.0011	0.15	0.02	-0.069	0.3	-0.065	0.33	0.66	1.6e-29	0.4	3e-10	0.29	1.1e-05	-0.27	3.7e-05
CD8A	blue	-0.23	0.00045	0.23	0.00045	-0.15	0.027	-0.25	0.00018	-0.21	0.0018	0.087	0.19	-0.12	0.071	-0.0021	0.97	0.76	4.6e-44	0.54	1.6e-18	0.57	2.6e-21	-0.22	0.00091
CD96	blue	-0.13	0.045	0.13	0.045	-0.26	6.1e-05	-0.27	4.1e-05	-0.18	0.006	0.099	0.14	-0.16	0.018	-0.061	0.36	0.85	1.3e-65	0.55	2.6e-19	0.52	6.5e-17	-0.25	0.00018
CDC42SE2	blue	-0.25	0.00013	0.25	0.00013	-0.4	3.5e-10	-0.26	9.3e-05	-0.39	1.3e-09	0.3	5.6e-06	0.12	0.067	-0.0053	0.94	0.73	9.7e-40	0.55	2.3e-19	0.53	9.4e-18	-0.063	0.34
CDKN1B	blue	0.31	2.7e-06	-0.31	2.7e-06	0.064	0.34	0.23	0.0006	0.27	3.2e-05	-0.26	9.5e-05	-0.65	6.6e-29	-0.23	0.00047	0.57	6.1e-21	0.014	0.84	-0.13	0.057	-0.74	2.8e-41
CELF2	blue	0.04	0.55	-0.04	0.55	0.15	0.022	-0.031	0.64	-0.063	0.35	-0.34	1.3e-07	-0.29	5.9e-06	0.16	0.017	0.8	7.7e-52	0.48	7.8e-15	0.25	0.00013	-0.48	1.1e-14
CLEC10A	blue	0.3	5e-06	-0.3	5e-06	0.17	0.01	0.079	0.24	0.39	7.7e-10	-0.43	1.7e-11	-0.49	2.3e-15	-0.3	3.4e-06	0.46	1.8e-13	0.04	0.55	0.046	0.49	-0.29	1.2e-05
CLEC2D	blue	0.0049	0.94	-0.0049	0.94	-0.26	7.8e-05	-0.22	0.0011	-0.15	0.025	0.089	0.18	-0.21	0.0012	-0.12	0.063	0.9	8e-83	0.47	1.1e-13	0.39	1.3e-09	-0.35	4.8e-08
CLIC2	blue	0.037	0.58	-0.037	0.58	0.15	0.024	-0.1	0.12	-0.016	0.8	-0.16	0.013	-0.3	3.2e-06	-0.017	0.8	0.65	2.7e-29	0.37	1.1e-08	0.29	1.2e-05	-0.4	5.7e-10
CMTM7	blue	-0.15	0.022	0.15	0.022	-0.024	0.72	-0.14	0.034	-0.37	6.7e-09	-0.07	0.29	0.04	0.54	0.31	2.1e-06	0.76	2.7e-44	0.59	2.2e-22	0.34	1.1e-07	-0.33	3.6e-07
CNTRL	blue	0.058	0.39	-0.058	0.39	-0.13	0.043	-0.11	0.11	-0.13	0.05	0.19	0.0047	-0.24	0.00025	-0.085	0.2	0.66	2.1e-30	0.3	2.9e-06	0.2	0.0024	-0.45	6.5e-13
COL4A4	blue	-0.0023	0.97	0.0023	0.97	-0.028	0.68	-0.1	0.12	-0.15	0.021	0.076	0.25	-0.27	4.6e-05	-0.055	0.41	0.65	1.3e-28	0.28	1.6e-05	0.14	0.034	-0.53	8.3e-18
CORO1A	blue	-0.051	0.44	0.051	0.44	-0.17	0.012	-0.22	0.00064	-0.17	0.012	0.018	0.79	-0.21	0.0015	-0.044	0.51	0.95	3e-115	0.56	6.6e-20	0.43	1.6e-11	-0.38	3.3e-09
COTL1	blue	-0.39	8.2e-10	0.39	8.2e-10	-0.28	2.4e-05	-0.43	7.5e-12	-0.59	1.7e-22	0.28	2.1e-05	0.36	2.8e-08	0.31	1.3e-06	0.74	2.3e-41	0.79	1.5e-49	0.62	8.2e-26	0.042	0.52
CPNE5	blue	-0.072	0.28	0.072	0.28	-0.14	0.033	-0.087	0.19	-0.14	0.035	-0.046	0.49	-0.27	4.6e-05	-0.039	0.56	0.8	1.2e-52	0.33	4.4e-07	0.19	0.0032	-0.44	3.6e-12
CPVL	blue	-0.023	0.73	0.023	0.73	0.056	0.4	-0.15	0.028	-0.11	0.11	-0.15	0.021	-0.11	0.11	0.091	0.17	0.56	2.6e-20	0.46	1.8e-13	0.24	0.00019	-0.23	0.00036
CR2	blue	0.28	1.5e-05	-0.28	1.5e-05	-0.088	0.18	-0.021	0.75	0.13	0.046	-0.073	0.27	-0.4	4.5e-10	-0.27	3.9e-05	0.68	7.8e-33	0.067	0.31	-0.065	0.33	-0.45	8.6e-13
CRTAM	blue	-0.19	0.0045	0.19	0.0045	-0.16	0.014	-0.27	3e-05	-0.23	0.00048	0.095	0.15	-0.095	0.15	0.024	0.72	0.78	1.8e-48	0.57	4.2e-21	0.53	1.5e-17	-0.23	0.00058
CSF2RB	blue	-0.12	0.076	0.12	0.076	-0.15	0.028	-0.15	0.023	-0.19	0.005	0.0097	0.88	-0.18	0.007	-0.019	0.78	0.8	7.1e-52	0.53	1e-17	0.37	8.3e-09	-0.37	1.2e-08
CST7	blue	-0.36	2.5e-08	0.36	2.5e-08	-0.23	0.00047	-0.3	3.6e-06	-0.37	1e-08	0.13	0.054	0.11	0.11	0.11	0.092	0.76	1.2e-43	0.7	2.5e-34	0.66	1.1e-29	-0.036	0.59
CTSH	blue	-0.19	0.004	0.19	0.004	-0.13	0.043	-0.036	0.58	-0.28	2e-05	-0.029	0.67	-0.091	0.17	0.17	0.01	0.77	1.5e-46	0.57	4e-21	0.35	8.1e-08	-0.37	7.9e-09
CTSS	blue	-0.18	0.0078	0.18	0.0078	-0.12	0.067	-0.12	0.061	-0.33	2.4e-07	0.064	0.34	-0.032	0.63	0.21	0.0018	0.83	4.3e-58	0.78	1.2e-47	0.53	4.5e-18	-0.34	1.5e-07
CTSW	blue	-0.14	0.038	0.14	0.038	-0.064	0.33	-0.1	0.12	-0.023	0.73	-0.013	0.85	-0.21	0.0013	-0.15	0.025	0.5	1e-15	0.32	9.4e-07	0.45	7.1e-13	-0.18	0.0062
CXCL13	blue	-0.48	1.7e-14	0.48	1.7e-14	-0.27	5.1e-05	-0.4	6.2e-10	-0.59	1.6e-22	0.32	6.8e-07	0.32	5.6e-07	0.31	1.2e-06	0.7	2.3e-35	0.73	8.1e-40	0.65	7.6e-29	0.062	0.35
CXCR4	blue	-0.42	2.5e-11	0.42	2.5e-11	-0.26	5.1e-05	-0.37	1.3e-08	-0.54	9.2e-19	0.29	7.8e-06	0.22	0.001	0.28	1.6e-05	0.78	4.1e-48	0.74	6.4e-41	0.58	8.8e-22	-0.093	0.16
CXCR6	blue	-0.27	5e-05	0.27	5e-05	-0.23	0.00043	-0.31	1.4e-06	-0.29	1.1e-05	0.19	0.004	-0.02	0.76	0.0069	0.92	0.71	1.4e-36	0.61	5e-25	0.61	3.3e-24	-0.14	0.04
CYAT1	blue	-0.13	0.049	0.13	0.049	-0.18	0.0055	-0.083	0.21	-0.14	0.03	0.12	0.072	-0.18	0.0056	-0.091	0.17	0.6	2.5e-23	0.26	7.8e-05	0.22	0.00075	-0.28	1.9e-05
CYFIP2	blue	0.085	0.2	-0.085	0.2	-0.12	0.067	-0.15	0.02	-0.026	0.7	-0.082	0.22	-0.36	3e-08	-0.16	0.013	0.91	5.4e-86	0.36	1.7e-08	0.25	0.00015	-0.47	4.1e-14
CYTIP	blue	-0.34	2e-07	0.34	2e-07	-0.29	6.5e-06	-0.24	0.00034	-0.45	1.3e-12	0.18	0.007	0.11	0.087	0.18	0.0074	0.88	1.2e-75	0.74	1.9e-41	0.58	1e-21	-0.15	0.028
DCK	blue	-0.0045	0.95	0.0045	0.95	-0.31	2.6e-06	-0.3	3.9e-06	-0.11	0.093	0.34	2e-07	-0.2	0.002	-0.19	0.0046	0.67	2.3e-31	0.31	1.8e-06	0.28	2e-05	-0.31	2.6e-06
DENND1C	blue	0.029	0.67	-0.029	0.67	-0.12	0.078	-0.18	0.0079	-0.029	0.66	-0.069	0.3	-0.32	7.8e-07	-0.18	0.0058	0.86	8.1e-67	0.38	1.8e-09	0.28	2.2e-05	-0.39	1.7e-09
DERL3	blue	-0.22	0.00084	0.22	0.00084	-0.16	0.013	-0.00053	0.99	-0.22	0.00065	0.051	0.44	-0.16	0.014	0.027	0.68	0.62	4e-25	0.29	9e-06	0.22	0.00094	-0.35	7e-08
DNAJB9	blue	-0.14	0.034	0.14	0.034	-0.12	0.073	0.13	0.044	-0.19	0.0036	-0.017	0.79	-0.088	0.19	0.057	0.39	0.51	1.8e-16	0.27	3.1e-05	0.12	0.061	-0.26	8e-05
DOCK10	blue	-0.13	0.05	0.13	0.05	-0.25	0.0001	-0.34	1.1e-07	-0.23	0.00045	0.12	0.063	-0.11	0.11	0.034	0.61	0.87	8.6e-72	0.59	5.5e-23	0.49	6.4e-15	-0.27	3.6e-05
DOCK11	blue	-0.19	0.0035	0.19	0.0035	-0.052	0.44	-0.28	2e-05	-0.37	9.2e-09	-0.036	0.59	0.17	0.011	0.32	8.9e-07	0.69	1.1e-33	0.59	7.5e-23	0.43	7.3e-12	-0.03	0.65
DOCK8	blue	0.084	0.21	-0.084	0.21	-0.13	0.052	-0.18	0.0054	-0.014	0.83	-0.12	0.081	-0.28	2e-05	-0.12	0.063	0.88	8.8e-74	0.47	3.6e-14	0.37	9.2e-09	-0.32	9.5e-07
DPEP2	blue	0.15	0.027	-0.15	0.027	0.13	0.056	-0.061	0.36	0.026	0.69	-0.3	5.8e-06	-0.27	3.1e-05	0.039	0.55	0.63	1.5e-26	0.39	9.7e-10	0.077	0.24	-0.37	5.7e-09
ELMO1	blue	-0.094	0.16	0.094	0.16	0.015	0.82	-0.065	0.33	-0.17	0.0093	-0.22	0.001	-0.15	0.028	0.21	0.0017	0.76	2.8e-44	0.51	1e-16	0.28	2.4e-05	-0.37	8.7e-09
EMB	blue	0.087	0.19	-0.087	0.19	-0.045	0.5	-0.15	0.025	0.0053	0.94	-0.14	0.034	-0.25	0.00017	-0.075	0.26	0.75	4.2e-42	0.34	1.7e-07	0.32	7.6e-07	-0.29	1.2e-05
ENPP2	blue	0.14	0.035	-0.14	0.035	0.12	0.065	-0.062	0.35	-0.076	0.25	-0.18	0.0055	-0.25	0.00016	0.091	0.17	0.73	6.9e-40	0.43	1.2e-11	0.22	0.00081	-0.51	2.2e-16
ENTPD1	blue	-0.41	1.1e-10	0.41	1.1e-10	-0.057	0.39	-0.27	4.8e-05	-0.46	3.8e-13	-0.028	0.68	0.16	0.014	0.49	6.5e-15	0.66	1.2e-29	0.7	5.9e-35	0.46	2.2e-13	-0.12	0.077
EOMES	blue	-0.11	0.11	0.11	0.11	-0.1	0.13	-0.2	0.0024	-0.14	0.035	-0.035	0.6	-0.21	0.0016	-0.021	0.76	0.79	3e-50	0.48	2.8e-14	0.46	4.4e-13	-0.31	1.7e-06
ETS1	blue	-0.34	9e-08	0.34	9e-08	-0.13	0.042	-0.35	8.2e-08	-0.63	8.1e-27	0.17	0.009	0.45	5.2e-13	0.47	1.2e-13	0.64	2.2e-27	0.74	4e-40	0.53	5.1e-18	0.072	0.28
EVI2A	blue	-0.28	1.2e-05	0.28	1.2e-05	-0.17	0.0099	-0.31	1.6e-06	-0.41	9.8e-11	0.076	0.25	0.074	0.27	0.27	3e-05	0.89	2.1e-78	0.77	7.8e-46	0.53	6.4e-18	-0.2	0.0021
EVI2B	blue	-0.12	0.08	0.12	0.08	-0.16	0.018	-0.14	0.041	-0.25	0.00017	0.0018	0.98	-0.14	0.03	0.088	0.19	0.94	7.2e-107	0.64	9.1e-28	0.4	2.6e-10	-0.39	1.1e-09
EVL	blue	-0.044	0.51	0.044	0.51	-0.024	0.72	-0.15	0.024	-0.16	0.016	-0.19	0.0049	-0.23	0.0004	0.13	0.042	0.83	5.6e-60	0.44	3.1e-12	0.3	4.5e-06	-0.45	7.9e-13
FAM107B	blue	0.2	0.0022	-0.2	0.0022	0.042	0.53	0.32	1.1e-06	0.087	0.19	-0.29	7.8e-06	-0.43	1.3e-11	-0.092	0.17	0.67	3.1e-31	0.19	0.0034	0.0041	0.95	-0.65	1.7e-28
FAM117A	blue	0.25	0.00014	-0.25	0.00014	0.038	0.57	0.21	0.0013	0.17	0.012	-0.24	0.00034	-0.58	2.8e-22	-0.21	0.0016	0.56	2.1e-20	0.031	0.65	-0.076	0.26	-0.73	1.2e-39
FAM30A	blue	-0.039	0.56	0.039	0.56	-0.15	0.027	-0.045	0.5	-0.085	0.2	-0.0022	0.97	-0.32	5.9e-07	-0.12	0.067	0.77	7.9e-46	0.28	2.5e-05	0.16	0.016	-0.45	7.2e-13
FAM78A	blue	-0.12	0.078	0.12	0.078	-0.032	0.63	-0.26	9.7e-05	-0.25	0.00018	-0.081	0.22	-0.1	0.11	0.14	0.029	0.87	2.8e-71	0.58	3.9e-22	0.41	1e-10	-0.31	1.6e-06
FCAMR	blue	0.3	4.2e-06	-0.3	4.2e-06	-0.098	0.14	-0.048	0.47	0.11	0.087	-0.028	0.67	-0.3	4.1e-06	-0.25	0.00017	0.55	3.2e-19	0.027	0.69	-0.073	0.27	-0.32	1.1e-06
FCGR2B	blue	0.085	0.2	-0.085	0.2	0.13	0.042	-0.045	0.5	0.038	0.57	-0.26	6.4e-05	-0.31	2.4e-06	0.029	0.66	0.67	1.2e-31	0.43	1e-11	0.19	0.0042	-0.37	5.6e-09
FCMR	blue	0.026	0.7	-0.026	0.7	-0.15	0.022	-0.17	0.011	-0.088	0.19	-0.053	0.43	-0.19	0.0046	-0.12	0.065	0.85	1.5e-65	0.36	3.5e-08	0.25	0.00014	-0.28	2.2e-05
FCRL1	blue	0.28	1.9e-05	-0.28	1.9e-05	-0.11	0.11	-0.065	0.33	0.12	0.062	-0.1	0.12	-0.38	2.4e-09	-0.25	0.00011	0.69	4.3e-34	0.087	0.19	-0.03	0.65	-0.43	1.3e-11
FCRL3	blue	0.11	0.11	-0.11	0.11	-0.15	0.027	-0.17	0.011	-0.031	0.64	-0.045	0.5	-0.27	2.6e-05	-0.16	0.013	0.86	2.6e-67	0.35	3.9e-08	0.25	0.00012	-0.36	3.5e-08
FCRL4	blue	0.3	3.1e-06	-0.3	3.1e-06	-0.11	0.11	-0.051	0.45	0.12	0.075	-0.067	0.31	-0.34	1.3e-07	-0.24	0.0002	0.59	1.7e-22	0.049	0.47	-0.081	0.23	-0.38	2e-09
FCRL5	blue	-0.17	0.009	0.17	0.009	-0.22	0.0011	-0.12	0.063	-0.22	0.00092	0.064	0.34	-0.17	0.011	0.014	0.83	0.79	7.2e-51	0.41	9.2e-11	0.27	3.5e-05	-0.35	8.7e-08
FCRLA	blue	0.17	0.009	-0.17	0.009	-0.18	0.0078	-0.1	0.13	0.052	0.43	-0.036	0.58	-0.37	9.9e-09	-0.24	0.00029	0.78	5.8e-48	0.18	0.0064	0.066	0.32	-0.43	9.5e-12
FERMT3	blue	-0.21	0.0011	0.21	0.0011	-0.2	0.0024	-0.27	4.6e-05	-0.32	6.4e-07	0.073	0.27	-0.054	0.42	0.13	0.056	0.91	9.2e-87	0.72	9.3e-38	0.54	1.4e-18	-0.29	9.2e-06
FGL2	blue	0.09	0.18	-0.09	0.18	0.2	0.003	0.036	0.59	0.09	0.17	-0.33	4.6e-07	-0.35	6.5e-08	-0.0018	0.98	0.64	6.6e-28	0.4	4e-10	0.3	5.3e-06	-0.4	2.6e-10
FGR	blue	-0.12	0.072	0.12	0.072	-0.01	0.88	-0.13	0.059	-0.23	0.00035	-0.12	0.08	0.049	0.46	0.23	0.00058	0.59	1.1e-22	0.72	2.9e-37	0.36	2.5e-08	-0.15	0.027
FKBP11	blue	-0.28	1.2e-05	0.28	1.2e-05	-0.15	0.019	0.18	0.0074	-0.41	9.3e-11	0.041	0.54	0.023	0.73	0.26	9.1e-05	0.63	4.2e-27	0.47	6.4e-14	0.29	6.5e-06	-0.35	4.4e-08
FNBP1	blue	0.16	0.016	-0.16	0.016	-0.065	0.33	-0.084	0.21	0.13	0.05	-0.27	3.6e-05	-0.46	2.5e-13	-0.2	0.0026	0.82	1.9e-56	0.29	9.4e-06	0.21	0.0014	-0.45	1.1e-12
FYB1	blue	-0.24	0.00021	0.24	0.00021	-0.22	0.00074	-0.33	3.6e-07	-0.43	1.4e-11	0.16	0.013	0.13	0.048	0.18	0.0066	0.83	7.7e-59	0.76	5.9e-45	0.63	6.5e-27	-0.13	0.042
FYN	blue	-0.23	0.00054	0.23	0.00054	0.0091	0.89	-0.2	0.0024	-0.4	6e-10	-0.15	0.027	0.094	0.16	0.44	1.8e-12	0.79	4.6e-50	0.67	1.5e-31	0.41	7.2e-11	-0.24	0.00032
GAPT	blue	0.19	0.0044	-0.19	0.0044	-0.08	0.23	-0.091	0.17	0.037	0.58	-0.095	0.15	-0.27	4.2e-05	-0.14	0.03	0.71	1.1e-36	0.25	0.00015	0.064	0.34	-0.35	5.6e-08
GATA3	blue	-0.32	1.2e-06	0.32	1.2e-06	-0.22	0.001	-0.23	0.00036	-0.3	4.1e-06	-0.0031	0.96	0.11	0.091	0.17	0.012	0.56	4.3e-20	0.49	4.9e-15	0.52	3e-17	0.053	0.42
GBP2	blue	-0.21	0.0013	0.21	0.0013	-0.013	0.84	-0.22	0.00069	-0.16	0.018	-0.013	0.85	-0.09	0.18	0.014	0.84	0.57	8.4e-21	0.49	4.9e-15	0.61	1.1e-24	-0.12	0.081
GBP4	blue	-0.17	0.0099	0.17	0.0099	-0.13	0.043	-0.26	5.4e-05	-0.21	0.0018	0.21	0.0018	-0.024	0.72	-0.078	0.24	0.55	9.2e-20	0.52	2.1e-17	0.71	7.4e-36	-0.12	0.083
GCSAM	blue	0.13	0.056	-0.13	0.056	-0.2	0.0025	-0.13	0.053	-0.0075	0.91	0.15	0.026	-0.29	8.1e-06	-0.25	0.00014	0.59	3.2e-23	0.18	0.0064	0.17	0.012	-0.37	1.1e-08
GIMAP2	blue	-0.054	0.41	0.054	0.41	-0.041	0.53	-0.17	0.0082	-0.15	0.021	-0.1	0.13	-0.17	0.012	0.037	0.58	0.87	4.7e-73	0.57	5e-21	0.5	1e-15	-0.3	5e-06
GIMAP4	blue	0.13	0.053	-0.13	0.053	0.13	0.049	-0.039	0.56	0.036	0.59	-0.3	3.2e-06	-0.39	9.2e-10	-0.046	0.49	0.84	8e-61	0.43	2e-11	0.3	4.4e-06	-0.51	1.3e-16
GIMAP6	blue	0.28	1.8e-05	-0.28	1.8e-05	0.29	1.1e-05	0.093	0.16	0.22	0.00086	-0.48	1.3e-14	-0.51	8.8e-17	-0.09	0.18	0.7	2.5e-34	0.25	0.00017	0.12	0.066	-0.57	4.4e-21
GIMAP7	blue	0.27	3.4e-05	-0.27	3.4e-05	0.19	0.0038	0.074	0.27	0.22	0.00096	-0.42	4.9e-11	-0.51	1.2e-16	-0.14	0.037	0.74	2.3e-41	0.24	0.00025	0.12	0.06	-0.55	4.1e-19
GIMAP8	blue	0.27	3.5e-05	-0.27	3.5e-05	0.35	7.4e-08	0.13	0.044	0.2	0.0025	-0.55	1.1e-19	-0.41	1.5e-10	0.0035	0.96	0.56	3.6e-20	0.22	0.00067	0.091	0.17	-0.46	1.5e-13
GLCCI1	blue	-0.12	0.062	0.12	0.062	-0.2	0.002	-0.023	0.73	-0.16	0.014	0.014	0.84	-0.26	9.8e-05	-0.049	0.46	0.8	4.8e-53	0.37	6.9e-09	0.26	8.7e-05	-0.41	8.9e-11
GLRX	blue	-0.34	1.8e-07	0.34	1.8e-07	-0.092	0.17	-0.071	0.29	-0.38	4e-09	-0.032	0.63	0.094	0.16	0.24	0.0002	0.64	5.2e-28	0.59	1.1e-22	0.48	2.4e-14	-0.083	0.21
GMFG	blue	-0.11	0.083	0.11	0.083	-0.083	0.21	-0.24	0.00033	-0.26	6.5e-05	-0.075	0.26	-0.095	0.15	0.12	0.06	0.91	1.2e-89	0.66	1.6e-29	0.42	4.9e-11	-0.31	1.3e-06
GPR171	blue	-0.31	1.5e-06	0.31	1.5e-06	-0.2	0.0027	-0.3	3.8e-06	-0.31	1.3e-06	0.078	0.24	0.079	0.24	0.13	0.048	0.75	1e-41	0.67	9.4e-31	0.61	9.4e-25	-0.033	0.62
GPR18	blue	0.19	0.0049	-0.19	0.0049	-0.17	0.012	-0.14	0.04	0.054	0.41	0.0041	0.95	-0.39	1.1e-09	-0.28	2.2e-05	0.84	1.3e-61	0.25	0.00013	0.18	0.0061	-0.45	1.2e-12
GPR183	blue	-0.32	1.1e-06	0.32	1.1e-06	-0.3	2.7e-06	-0.33	2.9e-07	-0.43	1.1e-11	0.17	0.0086	0.18	0.0072	0.2	0.0029	0.81	2.8e-53	0.74	3.6e-41	0.57	2.8e-21	-0.049	0.46
GPR65	blue	-0.25	0.00014	0.25	0.00014	-0.24	0.00024	-0.32	9.4e-07	-0.43	1.4e-11	0.17	0.0097	0.16	0.016	0.2	0.0029	0.82	9.4e-58	0.8	1.7e-51	0.6	6.4e-24	-0.094	0.16
GPR82	blue	-0.021	0.75	0.021	0.75	-0.18	0.0064	-0.24	0.00032	-0.17	0.0088	0.15	0.021	-0.073	0.27	-0.05	0.46	0.7	1.5e-35	0.45	1e-12	0.38	3.2e-09	-0.2	0.0023
GRK3	blue	-0.34	1.4e-07	0.34	1.4e-07	-0.22	0.00091	-0.29	1e-05	-0.48	1.2e-14	0.21	0.0015	0.24	0.00022	0.26	5.6e-05	0.63	1.1e-26	0.61	9.2e-25	0.52	1.7e-17	-0.018	0.79
GSAP	blue	0.076	0.25	-0.076	0.25	-0.21	0.0012	0.01	0.88	-0.078	0.24	0.16	0.014	-0.28	1.3e-05	-0.2	0.0031	0.61	7.8e-25	0.35	5.3e-08	0.23	0.00052	-0.47	5.7e-14
GVINP1	blue	0.014	0.84	-0.014	0.84	-0.16	0.014	-0.18	0.0057	-0.1	0.13	-0.021	0.75	-0.23	0.00052	-0.088	0.19	0.89	2.7e-77	0.44	5.9e-12	0.35	6.9e-08	-0.32	5.4e-07
GZMA	blue	-0.26	7.6e-05	0.26	7.6e-05	-0.2	0.0022	-0.3	3.4e-06	-0.28	2e-05	0.19	0.0047	-0.014	0.84	0.0045	0.95	0.71	6.3e-37	0.59	2.2e-22	0.65	4.4e-29	-0.13	0.046
GZMB	blue	-0.43	8.2e-12	0.43	8.2e-12	-0.28	1.3e-05	-0.37	6.8e-09	-0.49	5.1e-15	0.32	6.3e-07	0.23	0.00054	0.1	0.13	0.72	5.1e-37	0.77	3.4e-46	0.78	3e-48	0.048	0.47
GZMH	blue	-0.14	0.029	0.14	0.029	-0.1	0.13	-0.19	0.0035	-0.12	0.073	0.083	0.21	-0.16	0.013	-0.09	0.18	0.57	8.2e-21	0.43	1.2e-11	0.49	5.6e-15	-0.22	0.001
GZMK	blue	-0.12	0.077	0.12	0.077	-0.087	0.19	-0.19	0.0048	-0.14	0.039	-0.054	0.42	-0.18	0.0061	0.029	0.66	0.83	1.7e-59	0.52	6.9e-17	0.47	6.5e-14	-0.29	9.8e-06
HCLS1	blue	-0.27	4.3e-05	0.27	4.3e-05	-0.18	0.0071	-0.25	0.00012	-0.35	4.5e-08	0.034	0.61	-0.0071	0.91	0.2	0.0023	0.91	8.9e-87	0.73	8.9e-39	0.52	5.3e-17	-0.25	0.00012
HCST	blue	-0.17	0.0097	0.17	0.0097	-0.13	0.052	-0.21	0.0018	-0.18	0.0069	-0.096	0.15	-0.14	0.031	0.056	0.4	0.85	1.1e-63	0.61	5.6e-25	0.52	7.3e-17	-0.27	3.1e-05
HHEX	blue	0.13	0.047	-0.13	0.047	-0.032	0.63	-0.07	0.29	-0.014	0.84	-0.15	0.026	-0.26	6.2e-05	-0.033	0.62	0.72	2.6e-38	0.36	3.3e-08	0.11	0.091	-0.42	2.1e-11
HLA-DMA	blue	-0.13	0.047	0.13	0.047	-0.095	0.15	-0.17	0.011	-0.19	0.0033	0.009	0.89	-0.2	0.0019	0.029	0.67	0.86	4.6e-68	0.59	7.3e-23	0.51	1.6e-16	-0.38	2.4e-09
HLA-DMB	blue	-0.17	0.01	0.17	0.01	-0.12	0.06	-0.26	9.4e-05	-0.28	2e-05	0.093	0.16	-0.14	0.029	0.079	0.24	0.9	3.2e-83	0.65	1.2e-28	0.53	7.4e-18	-0.37	8.3e-09
HLA-DOB	blue	-0.078	0.24	0.078	0.24	-0.28	1.8e-05	-0.17	0.012	-0.14	0.03	0.076	0.25	-0.23	0.00047	-0.2	0.0031	0.84	2e-62	0.36	2.4e-08	0.34	9.3e-08	-0.31	1.8e-06
HLA-DPA1	blue	-0.27	3.6e-05	0.27	3.6e-05	-0.15	0.024	-0.2	0.0023	-0.34	1.3e-07	0.11	0.11	-0.014	0.84	0.14	0.029	0.79	3.1e-49	0.67	1.5e-31	0.61	3e-24	-0.25	0.00018
HLA-DPB1	blue	0.039	0.56	-0.039	0.56	-0.029	0.67	-0.1	0.13	-0.057	0.39	-0.14	0.041	-0.31	1.4e-06	0.00051	0.99	0.77	4.1e-46	0.43	6.6e-12	0.3	3.5e-06	-0.46	2.1e-13
HLA-DQA1	blue	-0.11	0.092	0.11	0.092	-0.12	0.06	-0.22	0.00073	-0.23	0.00041	0.048	0.47	-0.024	0.72	0.082	0.22	0.65	1.1e-28	0.5	5.4e-16	0.46	4.4e-13	-0.16	0.013
HLA-DRA	blue	-0.32	7.3e-07	0.32	7.3e-07	-0.18	0.0059	-0.3	5e-06	-0.43	7e-12	0.22	0.00064	0.054	0.42	0.19	0.0038	0.82	3.1e-57	0.76	8.6e-44	0.64	4.7e-28	-0.22	0.00089
HLA-DRB1	blue	-0.31	2e-06	0.31	2e-06	-0.15	0.023	-0.25	0.0001	-0.41	8.8e-11	0.14	0.039	0.0048	0.94	0.21	0.0011	0.82	7.1e-58	0.74	1.9e-40	0.63	2.2e-26	-0.29	8.8e-06
HLA-DRB5	blue	-0.34	1e-07	0.34	1e-07	-0.15	0.024	-0.27	3.3e-05	-0.44	3.4e-12	0.16	0.019	0.063	0.34	0.22	0.001	0.78	1.4e-47	0.73	3.9e-39	0.63	9e-27	-0.22	0.0011
HVCN1	blue	0.17	0.0092	-0.17	0.0092	-0.032	0.64	-0.097	0.14	0.024	0.71	-0.13	0.053	-0.34	1.6e-07	-0.14	0.035	0.77	3.8e-45	0.26	5.3e-05	0.13	0.043	-0.46	2.4e-13
ICAM2	blue	-0.011	0.87	0.011	0.87	0.12	0.075	0.0086	0.9	-0.13	0.058	-0.22	0.00076	-0.3	3.7e-06	0.05	0.45	0.77	4.2e-45	0.36	1.4e-08	0.18	0.0057	-0.55	2.4e-19
ICOS	blue	-0.29	6.9e-06	0.29	6.9e-06	-0.29	7.1e-06	-0.38	1.8e-09	-0.4	3.4e-10	0.24	0.0003	0.15	0.028	0.089	0.18	0.8	2.2e-51	0.73	1.1e-38	0.67	1.4e-30	-0.024	0.72
IFNG	blue	-0.24	0.00027	0.24	0.00027	-0.22	0.0011	-0.28	2e-05	-0.26	5.8e-05	0.3	5.4e-06	-0.01	0.88	-0.11	0.11	0.55	1.4e-19	0.5	8.2e-16	0.57	2.6e-21	-0.11	0.11
IGFLR1	blue	-0.27	2.6e-05	0.27	2.6e-05	-0.22	0.0011	-0.21	0.0014	-0.34	1.6e-07	0.11	0.11	0.0098	0.88	0.063	0.34	0.8	1e-51	0.6	8.5e-24	0.58	1e-21	-0.17	0.012
IGHD	blue	0.033	0.62	-0.033	0.62	-0.16	0.014	0.19	0.0044	-0.012	0.86	-0.026	0.69	-0.25	0.00015	-0.11	0.085	0.5	4.3e-16	0.11	0.089	0.023	0.73	-0.37	1e-08
IGHM	blue	-0.17	0.011	0.17	0.011	-0.19	0.0031	-0.033	0.62	-0.25	0.00015	0.11	0.096	-0.15	0.019	0.012	0.85	0.8	4.9e-52	0.45	9.1e-13	0.3	4e-06	-0.4	5.9e-10
IGHV3-54	blue	-0.18	0.0059	0.18	0.0059	-0.16	0.018	-0.12	0.076	-0.22	0.00095	0.16	0.016	-0.16	0.018	-0.04	0.55	0.64	4.9e-28	0.37	8.3e-09	0.29	1.1e-05	-0.32	8.3e-07
IGHV3-72	blue	-0.19	0.0035	0.19	0.0035	-0.23	0.00039	-0.14	0.037	-0.2	0.0024	0.15	0.028	-0.11	0.093	-0.06	0.36	0.59	1.4e-22	0.35	5.3e-08	0.26	7.1e-05	-0.21	0.0013
IGK	blue	-0.25	0.0001	0.25	0.0001	-0.18	0.0061	-0.027	0.69	-0.27	4.6e-05	0.084	0.2	-0.11	0.1	0.044	0.51	0.71	9.8e-37	0.41	8.7e-11	0.3	2.8e-06	-0.32	5.9e-07
IGKC	blue	-0.23	0.00039	0.23	0.00039	-0.18	0.0074	0.03	0.65	-0.26	5.1e-05	0.093	0.16	-0.12	0.075	0.055	0.4	0.71	5.7e-37	0.4	2.2e-10	0.3	4.4e-06	-0.35	4.5e-08
IGLC1	blue	-0.21	0.0015	0.21	0.0015	-0.19	0.0045	0.019	0.78	-0.25	0.00016	0.11	0.11	-0.13	0.049	0.03	0.65	0.71	2e-36	0.4	2.1e-10	0.3	2.8e-06	-0.34	9.2e-08
IGLJ3	blue	-0.26	8.8e-05	0.26	8.8e-05	-0.22	0.00083	-0.01	0.88	-0.28	2.2e-05	0.12	0.063	-0.092	0.16	0.056	0.4	0.7	3.4e-35	0.42	5.9e-11	0.31	1.5e-06	-0.31	1.8e-06
IGLL3P	blue	-0.24	0.00024	0.24	0.00024	-0.15	0.024	0.053	0.43	-0.25	0.0001	0.086	0.2	-0.081	0.22	0.1	0.13	0.63	1.3e-26	0.37	5.5e-09	0.28	2.4e-05	-0.31	1.9e-06
IGLL5	blue	-0.2	0.0021	0.2	0.0021	-0.19	0.0045	0.028	0.67	-0.23	0.0004	0.085	0.2	-0.14	0.038	0.032	0.63	0.69	1.1e-33	0.39	1.5e-09	0.29	1.2e-05	-0.35	4.6e-08
IGLV1-44	blue	-0.22	0.00085	0.22	0.00085	-0.19	0.0031	0.0074	0.91	-0.27	4.5e-05	0.096	0.15	-0.12	0.075	0.064	0.34	0.72	7.5e-38	0.42	4e-11	0.32	1.2e-06	-0.35	8.7e-08
IGLV6-57	blue	-0.19	0.0032	0.19	0.0032	-0.13	0.042	-0.0045	0.95	-0.22	0.00071	0.036	0.58	-0.12	0.077	0.042	0.53	0.62	1e-25	0.35	7.1e-08	0.29	7.5e-06	-0.3	2.9e-06
IKZF3	blue	-0.014	0.83	0.014	0.83	-0.2	0.0029	-0.2	0.0027	-0.1	0.13	0.052	0.44	-0.31	1.8e-06	-0.16	0.018	0.93	2.8e-102	0.44	2.6e-12	0.35	5.9e-08	-0.44	4e-12
IL10RA	blue	-0.23	0.00061	0.23	0.00061	-0.13	0.047	-0.23	0.00053	-0.26	8.2e-05	-0.048	0.47	-0.11	0.11	0.13	0.055	0.91	2.6e-90	0.7	2.1e-34	0.54	1.5e-18	-0.3	3.7e-06
IL21R	blue	-0.16	0.017	0.16	0.017	-0.28	1.4e-05	-0.33	2.8e-07	-0.29	6.8e-06	0.22	0.00069	-0.066	0.32	-0.056	0.4	0.85	9.7e-66	0.57	9e-21	0.53	7.4e-18	-0.25	0.00018
IL27RA	blue	-0.23	0.00048	0.23	0.00048	-0.25	0.00012	-0.31	1.4e-06	-0.44	1.9e-12	0.35	5.4e-08	0.12	0.067	0.095	0.15	0.65	1.9e-28	0.54	5.8e-19	0.42	4.5e-11	-0.21	0.0012
IL2RB	blue	-0.33	3e-07	0.33	3e-07	-0.29	9.7e-06	-0.37	1.4e-08	-0.38	2.5e-09	0.25	0.00015	0.014	0.83	0.038	0.57	0.86	2.8e-68	0.67	1.3e-30	0.66	5.8e-30	-0.17	0.01
IL2RG	blue	-0.15	0.022	0.15	0.022	-0.21	0.0013	-0.22	0.00068	-0.24	0.00031	0.082	0.22	-0.17	0.01	-0.033	0.62	0.92	1.3e-94	0.6	2.2e-23	0.5	7.7e-16	-0.37	1.3e-08
IL7R	blue	-0.5	1e-15	0.5	1e-15	-0.3	3.5e-06	-0.4	3.8e-10	-0.67	6.1e-31	0.3	2.8e-06	0.46	1.8e-13	0.43	7.9e-12	0.69	2.1e-33	0.83	4.7e-58	0.67	6.4e-31	0.12	0.062
INTS6L	blue	0.12	0.061	-0.12	0.061	-0.14	0.035	-0.054	0.42	0.12	0.078	0.018	0.78	-0.46	4.6e-13	-0.22	0.00072	0.58	1.4e-21	0.11	0.1	0.062	0.35	-0.53	1.4e-17
IPCEF1	blue	0.043	0.52	-0.043	0.52	-0.1	0.13	-0.13	0.045	0.029	0.67	-0.22	0.00093	-0.29	1.2e-05	-0.078	0.24	0.81	1.8e-53	0.39	1.4e-09	0.33	5e-07	-0.31	2.6e-06
IRF1	blue	-0.23	0.00056	0.23	0.00056	-0.27	2.7e-05	-0.33	2.5e-07	-0.26	5.3e-05	0.27	3e-05	-0.0062	0.93	-0.099	0.13	0.65	3.7e-29	0.57	1e-20	0.7	2.5e-35	-0.12	0.069
IRF8	blue	-0.026	0.69	0.026	0.69	-0.11	0.088	-0.22	0.0009	-0.11	0.1	-0.042	0.53	-0.23	0.00045	-0.05	0.46	0.93	3.7e-99	0.52	1.5e-17	0.42	6.3e-11	-0.34	1.2e-07
ISG20	blue	-0.29	1.1e-05	0.29	1.1e-05	-0.28	1.8e-05	-0.3	3.1e-06	-0.35	5.7e-08	0.21	0.0012	0.14	0.041	0.05	0.45	0.73	3.5e-39	0.64	1.6e-27	0.73	8.7e-40	-0.013	0.84
ITGA4	blue	-0.23	0.00052	0.23	0.00052	-0.26	6.4e-05	-0.33	3.3e-07	-0.42	3.5e-11	0.17	0.0099	0.13	0.053	0.25	0.00017	0.83	2e-58	0.7	5.6e-35	0.53	5.2e-18	-0.15	0.026
ITGAL	blue	-0.082	0.22	0.082	0.22	-0.19	0.0043	-0.24	0.00024	-0.13	0.056	0.017	0.8	-0.26	8e-05	-0.11	0.09	0.94	3.7e-106	0.51	2.4e-16	0.44	1.8e-12	-0.37	1.2e-08
ITGB2	blue	-0.28	1.3e-05	0.28	1.3e-05	-0.17	0.01	-0.32	7.6e-07	-0.43	6.9e-12	0.14	0.035	0.12	0.081	0.27	3.2e-05	0.81	1e-54	0.83	2.3e-60	0.6	1.6e-23	-0.15	0.021
ITGB2-AS1	blue	0.075	0.26	-0.075	0.26	-0.13	0.055	-0.18	0.008	-0.017	0.8	-0.091	0.17	-0.33	5.1e-07	-0.16	0.016	0.85	1.2e-63	0.33	2.2e-07	0.23	0.00049	-0.38	1.9e-09
ITK	blue	-0.15	0.028	0.15	0.028	-0.19	0.0042	-0.26	5.8e-05	-0.22	0.001	0.018	0.79	-0.1	0.12	0.034	0.61	0.91	2.9e-88	0.61	5.4e-25	0.53	7.5e-18	-0.23	0.00048
ITM2A	blue	0.29	8.5e-06	-0.29	8.5e-06	0.35	6e-08	0.24	0.00022	0.35	4.8e-08	-0.59	3.2e-23	-0.61	3e-24	-0.12	0.069	0.49	6.6e-15	-0.026	0.69	-0.16	0.017	-0.57	4.2e-21
ITM2C	blue	-0.32	1.1e-06	0.32	1.1e-06	-0.13	0.046	0.031	0.64	-0.46	2.7e-13	0.089	0.18	0.056	0.4	0.3	5.9e-06	0.6	1.5e-23	0.44	4.5e-12	0.3	4.7e-06	-0.35	7.5e-08
ITPR1	blue	0.22	0.00062	-0.22	0.00062	0.02	0.76	0.26	8.6e-05	0.083	0.21	-0.28	1.8e-05	-0.35	8.3e-08	-0.061	0.36	0.57	4.4e-21	0.16	0.013	0.032	0.63	-0.48	1.5e-14
JAK2	blue	0.1	0.13	-0.1	0.13	-0.076	0.25	-0.22	0.0008	-0.028	0.68	0.031	0.64	-0.19	0.0041	-0.099	0.14	0.53	2.9e-18	0.39	1.3e-09	0.42	2.8e-11	-0.25	0.00014
JAML	blue	-0.081	0.23	0.081	0.23	-0.015	0.82	-0.18	0.0062	-0.056	0.4	-0.15	0.02	-0.24	0.0002	-0.054	0.42	0.81	3e-54	0.48	1.2e-14	0.34	2e-07	-0.3	4.5e-06
JCHAIN	blue	0.036	0.59	-0.036	0.59	-0.038	0.56	0.3	4.5e-06	0.061	0.36	-0.094	0.16	-0.36	2.1e-08	-0.11	0.086	0.53	5.6e-18	0.14	0.041	0.055	0.41	-0.47	4.1e-14
KBTBD8	blue	0.11	0.11	-0.11	0.11	-0.23	0.00061	-0.22	0.00093	-0.071	0.28	0.045	0.5	-0.13	0.043	-0.15	0.026	0.75	4e-42	0.35	8.2e-08	0.23	0.00037	-0.2	0.0021
KCNA3	blue	-0.0085	0.9	0.0085	0.9	-0.21	0.0013	-0.16	0.016	-0.1	0.12	0.0093	0.89	-0.23	0.00048	-0.085	0.2	0.77	1.2e-46	0.34	1.1e-07	0.25	0.00011	-0.35	8.4e-08
KLHL6	blue	-0.24	0.00022	0.24	0.00022	-0.21	0.0012	-0.25	0.00018	-0.4	3.3e-10	0.12	0.072	0.092	0.16	0.23	0.00046	0.82	6.6e-57	0.65	3.1e-29	0.46	4e-13	-0.17	0.011
KLRB1	blue	0.13	0.047	-0.13	0.047	-0.12	0.061	-0.1	0.12	0.072	0.28	-0.049	0.46	-0.48	2e-14	-0.28	1.5e-05	0.81	1.9e-54	0.22	0.001	0.12	0.078	-0.53	4.8e-18
KLRC1	blue	-0.32	8.5e-07	0.32	8.5e-07	-0.15	0.026	-0.22	0.00068	-0.31	1.2e-06	0.19	0.0047	0.11	0.096	0.098	0.14	0.54	2.6e-18	0.55	1.7e-19	0.63	2.3e-26	-0.012	0.85
KLRC3	blue	-0.11	0.11	0.11	0.11	-0.12	0.063	-0.18	0.0058	-0.1	0.13	0.003	0.96	-0.23	0.00046	-0.083	0.21	0.78	4.1e-48	0.48	1.3e-14	0.51	2.1e-16	-0.29	1.1e-05
KLRD1	blue	-0.24	0.00024	0.24	0.00024	-0.15	0.028	-0.25	0.00012	-0.28	1.5e-05	0.11	0.094	0.047	0.48	0.09	0.18	0.63	1.9e-26	0.6	5.9e-24	0.61	7e-25	-0.069	0.3
KMO	blue	-0.17	0.011	0.17	0.011	-0.26	6.3e-05	-0.29	7e-06	-0.41	1.7e-10	0.19	0.0044	0.19	0.0046	0.16	0.015	0.73	1.6e-39	0.7	2.8e-34	0.53	3.6e-18	-0.062	0.35
LAG3	blue	-0.29	6.3e-06	0.29	6.3e-06	-0.24	0.0002	-0.36	2.8e-08	-0.3	4.3e-06	0.23	0.00046	0.082	0.22	-0.024	0.72	0.62	2e-25	0.59	1.4e-22	0.69	9.8e-34	0.016	0.81
LAPTM5	blue	-0.32	5.2e-07	0.32	5.2e-07	-0.23	0.00054	-0.34	1.3e-07	-0.5	4.7e-16	0.23	0.00061	0.13	0.057	0.29	1e-05	0.87	4.3e-70	0.82	4.5e-57	0.57	6.8e-21	-0.22	0.00083
LAT	blue	-0.0098	0.88	0.0098	0.88	-0.2	0.0022	-0.27	4.7e-05	-0.036	0.59	-0.042	0.52	-0.3	3.7e-06	-0.17	0.011	0.86	1.7e-67	0.39	1.4e-09	0.33	2.4e-07	-0.32	8.3e-07
LAX1	blue	-0.17	0.0094	0.17	0.0094	-0.21	0.0013	-0.15	0.025	-0.21	0.0017	0.024	0.72	-0.2	0.003	0.013	0.85	0.83	7.7e-60	0.43	1.8e-11	0.33	2.9e-07	-0.37	5.4e-09
LBH	blue	-0.33	2.2e-07	0.33	2.2e-07	-0.039	0.55	-0.12	0.07	-0.53	6.8e-18	0.055	0.41	0.2	0.0023	0.43	7.2e-12	0.65	3.9e-29	0.57	5.8e-21	0.38	2.3e-09	-0.23	0.0005
LCK	blue	-0.13	0.057	0.13	0.057	-0.2	0.003	-0.29	6.2e-06	-0.22	0.0011	0.096	0.15	-0.16	0.014	-0.05	0.45	0.92	1.3e-95	0.53	3.6e-18	0.48	1.6e-14	-0.31	2.5e-06
LCP1	blue	-0.2	0.0021	0.2	0.0021	-0.2	0.0022	-0.25	0.00016	-0.35	6e-08	0.12	0.063	-0.034	0.61	0.1	0.13	0.9	3.5e-83	0.69	1.6e-33	0.49	3.8e-15	-0.29	7.9e-06
LGALS2	blue	0.2	0.002	-0.2	0.002	0.045	0.5	-0.11	0.1	0.13	0.05	-0.17	0.009	-0.4	3.7e-10	-0.24	0.00032	0.7	4.3e-35	0.2	0.002	0.2	0.0024	-0.38	4.9e-09
LINC00926	blue	0.28	1.5e-05	-0.28	1.5e-05	-0.047	0.48	-0.068	0.31	0.13	0.055	-0.17	0.012	-0.36	1.7e-08	-0.2	0.0023	0.67	2.8e-31	0.1	0.11	-0.02	0.77	-0.39	9.5e-10
LINC01215	blue	0.23	0.00035	-0.23	0.00035	-0.17	0.011	-0.082	0.22	0.069	0.3	-0.046	0.49	-0.33	2.8e-07	-0.24	0.00032	0.73	1.4e-39	0.19	0.0036	0.068	0.31	-0.39	7.9e-10
LOC100505501	blue	-0.16	0.014	0.16	0.014	-0.077	0.25	-0.18	0.0074	-0.44	5.6e-12	0.14	0.031	0.32	7.8e-07	0.33	3.9e-07	0.38	2e-09	0.36	2.7e-08	0.25	0.00014	0.0045	0.95
LOC100996740	blue	-0.14	0.035	0.14	0.035	-0.18	0.0068	0.011	0.86	-0.34	1.6e-07	0.16	0.013	-0.065	0.33	0.067	0.31	0.7	1.1e-34	0.43	1.1e-11	0.37	8.3e-09	-0.41	6.7e-11
LOC101928152	blue	-0.33	4.3e-07	0.33	4.3e-07	-0.2	0.0026	-0.26	8.4e-05	-0.32	9.6e-07	0.054	0.42	0.1	0.13	0.17	0.012	0.63	1.4e-26	0.6	5.2e-24	0.54	9e-19	-0.023	0.73
LOC101929272	blue	-0.049	0.46	0.049	0.46	-0.22	0.00088	-0.034	0.61	-0.1	0.12	0.043	0.52	-0.31	2.4e-06	-0.14	0.041	0.79	6.9e-50	0.3	3.9e-06	0.19	0.0044	-0.46	3.9e-13
LOC153684	blue	0.15	0.025	-0.15	0.025	0.12	0.069	0.0086	0.9	0.1	0.13	-0.29	7.4e-06	-0.51	3.2e-16	-0.08	0.23	0.63	2e-26	0.1	0.13	-0.00067	0.99	-0.61	5.7e-25
LPXN	blue	-0.2	0.0027	0.2	0.0027	-0.15	0.024	-0.17	0.0094	-0.41	1.1e-10	0.11	0.11	0.049	0.46	0.2	0.0024	0.85	5.1e-66	0.62	1.4e-25	0.43	1.2e-11	-0.28	1.7e-05
LRMP	blue	0.38	2e-09	-0.38	2e-09	-0.047	0.48	0.1	0.13	0.25	0.00013	-0.19	0.0032	-0.55	1.7e-19	-0.31	2e-06	0.72	6.3e-38	0.11	0.1	-0.05	0.45	-0.61	7.5e-25
LSP1	blue	-0.0038	0.95	0.0038	0.95	0.11	0.1	-0.023	0.73	0.014	0.84	-0.24	0.00025	-0.29	5.9e-06	0.026	0.7	0.58	2.6e-22	0.29	9.5e-06	0.16	0.016	-0.42	6.1e-11
LST1	blue	-0.23	0.00036	0.23	0.00036	-0.12	0.061	-0.27	3.7e-05	-0.4	2.5e-10	0.093	0.16	0.11	0.085	0.21	0.0018	0.75	6.8e-43	0.79	9.8e-51	0.55	1e-19	-0.15	0.024
LTB	blue	0.04	0.55	-0.04	0.55	-0.2	0.0028	-0.23	0.00053	-0.1	0.13	0.049	0.46	-0.26	7.8e-05	-0.2	0.0027	0.86	2.9e-68	0.37	5.4e-09	0.3	4.6e-06	-0.36	2.2e-08
LY75	blue	0.12	0.07	-0.12	0.07	0.05	0.45	0.14	0.032	0.027	0.69	-0.17	0.012	-0.43	7.8e-12	0.031	0.64	0.65	1.4e-28	0.3	5.8e-06	0.085	0.2	-0.66	2.2e-29
LY86	blue	-0.063	0.35	0.063	0.35	-0.12	0.066	-0.2	0.0021	-0.23	0.00052	-0.012	0.85	-0.12	0.081	0.096	0.15	0.85	7.5e-64	0.53	4.2e-18	0.33	3.2e-07	-0.33	2.8e-07
LY9	blue	0.0048	0.94	-0.0048	0.94	-0.2	0.0023	-0.13	0.059	-0.028	0.67	-0.076	0.26	-0.35	6.5e-08	-0.16	0.014	0.9	1.2e-83	0.33	3e-07	0.27	4.1e-05	-0.41	1.2e-10
LY96	blue	-0.42	4.8e-11	0.42	4.8e-11	-0.13	0.051	-0.17	0.012	-0.49	1.7e-15	0.037	0.58	0.21	0.0012	0.41	1.2e-10	0.69	1e-33	0.73	3.5e-39	0.53	1.1e-17	-0.1	0.13
LYN	blue	-0.32	8.1e-07	0.32	8.1e-07	-0.35	4.6e-08	-0.2	0.0022	-0.43	8.2e-12	0.31	1.3e-06	0.18	0.0072	0.083	0.21	0.63	4.9e-27	0.66	1.4e-29	0.54	1.7e-18	-0.068	0.31
LYSMD2	blue	-0.007	0.92	0.007	0.92	-0.17	0.0091	-0.18	0.0073	-0.12	0.078	0.17	0.012	-0.18	0.0067	-0.19	0.0037	0.67	6.4e-31	0.45	9.7e-13	0.44	3.2e-12	-0.25	0.00013
MAP3K14	blue	0.2	0.0022	-0.2	0.0022	0.03	0.66	-0.044	0.51	0.1	0.12	-0.022	0.74	-0.5	1.3e-15	-0.26	6.8e-05	0.62	3.4e-25	0.15	0.02	0.1	0.13	-0.64	3.3e-28
MAP4K1	blue	0.041	0.54	-0.041	0.54	-0.16	0.016	-0.2	0.0022	0.023	0.73	-0.068	0.3	-0.37	5.1e-09	-0.23	0.00041	0.88	1.2e-73	0.35	6.6e-08	0.3	5.2e-06	-0.4	6.1e-10
MAP7	blue	0.17	0.0089	-0.17	0.0089	-0.12	0.07	0.17	0.0082	0.42	4e-11	-0.051	0.44	-0.076	0.26	-0.38	2.4e-09	-0.59	1.4e-22	-0.58	3.6e-22	-0.37	1.1e-08	0.36	2e-08
#####	blue	-0.17	0.012	0.17	0.012	-0.19	0.004	-0.3	4.8e-06	-0.3	3.1e-06	0.11	0.098	0.034	0.61	0.13	0.052	0.84	1.5e-62	0.71	1.1e-35	0.54	2.6e-18	-0.16	0.016
MCOLN2	blue	-0.095	0.15	0.095	0.15	-0.28	1.7e-05	-0.28	2.2e-05	-0.23	0.00046	0.12	0.064	-0.021	0.75	-0.043	0.52	0.8	3e-52	0.57	2.9e-21	0.56	3.7e-20	-0.13	0.046
MEI1	blue	-0.24	0.00028	0.24	0.00028	-0.26	6.2e-05	-0.096	0.15	-0.23	0.00038	0.26	7.7e-05	-0.2	0.003	-0.067	0.32	0.61	1.3e-24	0.33	4.7e-07	0.27	4.5e-05	-0.39	9.6e-10
MIAT	blue	-0.4	2.9e-10	0.4	2.9e-10	-0.25	0.00012	-0.32	1.1e-06	-0.45	1.6e-12	0.2	0.002	0.12	0.08	0.26	5.6e-05	0.72	2.4e-37	0.61	1.4e-24	0.53	4.1e-18	-0.14	0.035
MICAL1	blue	-0.21	0.0014	0.21	0.0014	-0.012	0.85	-0.33	2.2e-07	-0.32	5.4e-07	-0.13	0.05	0.12	0.079	0.3	3.7e-06	0.64	1.9e-27	0.55	3.6e-19	0.39	7.2e-10	-0.072	0.28
MIR155HG	blue	-0.13	0.055	0.13	0.055	-0.23	0.00061	-0.31	2.7e-06	-0.29	6e-06	0.19	0.0043	-0.068	0.31	0.0024	0.97	0.9	9.6e-86	0.64	3.2e-27	0.49	4.7e-15	-0.29	1.2e-05
MPEG1	blue	0.033	0.62	-0.033	0.62	0.03	0.66	-0.1	0.13	-0.0077	0.91	-0.21	0.0011	-0.29	6.8e-06	-0.026	0.7	0.83	3.3e-59	0.51	3.2e-16	0.37	8.5e-09	-0.39	8.5e-10
MS4A1	blue	0.14	0.037	-0.14	0.037	-0.14	0.034	-0.11	0.1	0.04	0.55	-0.0043	0.95	-0.36	3e-08	-0.24	0.0002	0.82	1.2e-57	0.23	0.00043	0.13	0.047	-0.43	1.9e-11
MYO1F	blue	-0.19	0.0034	0.19	0.0034	-0.093	0.16	-0.27	2.8e-05	-0.27	2.9e-05	-0.05	0.45	0.0059	0.93	0.19	0.0035	0.76	1.5e-44	0.77	1.9e-45	0.51	2.5e-16	-0.18	0.0073
MYO1G	blue	-0.19	0.0039	0.19	0.0039	-0.24	0.00024	-0.3	2.7e-06	-0.29	6.6e-06	0.12	0.076	0.0022	0.97	-0.013	0.84	0.77	2.1e-45	0.56	4.4e-20	0.48	1.8e-14	-0.14	0.041
MZB1	blue	-0.24	0.00026	0.24	0.00026	-0.19	0.0038	-0.034	0.61	-0.27	3.6e-05	0.079	0.23	-0.13	0.05	0.046	0.49	0.73	8.8e-39	0.39	8.6e-10	0.28	2.4e-05	-0.36	3.4e-08
NAPSB	blue	0.11	0.083	-0.11	0.083	-0.094	0.16	-0.15	0.021	0.034	0.61	-0.094	0.16	-0.33	2.6e-07	-0.18	0.006	0.86	1.6e-68	0.36	2.9e-08	0.27	4.5e-05	-0.39	8.6e-10
NCF1	blue	-0.027	0.69	0.027	0.69	-0.17	0.01	-0.19	0.0041	-0.15	0.024	0.033	0.62	-0.18	0.0076	-0.098	0.14	0.85	2.1e-64	0.54	6.9e-19	0.38	3.7e-09	-0.31	2.6e-06
NCF4	blue	-0.14	0.03	0.14	0.03	-0.19	0.0037	-0.22	0.00078	-0.21	0.0017	0.046	0.49	-0.16	0.016	-0.02	0.76	0.84	3.7e-63	0.6	2.6e-23	0.46	1.6e-13	-0.33	3.7e-07
NCKAP1L	blue	-0.064	0.34	0.064	0.34	-0.11	0.098	-0.21	0.0011	-0.17	0.013	-0.073	0.27	-0.2	0.0023	0.021	0.75	0.93	1.2e-102	0.61	3.1e-24	0.43	1.9e-11	-0.35	8.2e-08
NKG7	blue	-0.16	0.013	0.16	0.013	-0.17	0.0092	-0.26	8.2e-05	-0.17	0.012	0.091	0.17	-0.16	0.016	-0.079	0.24	0.76	1e-43	0.52	2.8e-17	0.58	6.9e-22	-0.25	0.00017
NLRC3	blue	-0.077	0.25	0.077	0.25	-0.14	0.033	-0.26	6.6e-05	-0.11	0.1	-0.0059	0.93	-0.25	0.00017	-0.079	0.23	0.93	3.8e-97	0.5	1.7e-15	0.45	1.4e-12	-0.32	6e-07
NXPE3	blue	-0.21	0.0014	0.21	0.0014	0.15	0.023	-0.17	0.011	-0.43	2e-11	0.051	0.44	0.1	0.13	0.28	1.3e-05	0.58	7.8e-22	0.48	1.7e-14	0.27	3.9e-05	-0.22	0.00083
OXNAD1	blue	0.27	3.5e-05	-0.27	3.5e-05	-0.14	0.031	-0.085	0.2	0.26	7.3e-05	-0.03	0.65	-0.5	6.1e-16	-0.43	1.5e-11	0.57	2.9e-21	0.056	0.4	0.054	0.42	-0.39	7.1e-10
P2RX5	blue	0.045	0.5	-0.045	0.5	0.056	0.4	-0.086	0.2	-0.15	0.024	-0.076	0.25	-0.2	0.0021	0.0026	0.97	0.82	3.1e-56	0.4	4.5e-10	0.18	0.0052	-0.4	5e-10
P2RY10	blue	-0.072	0.28	0.072	0.28	-0.28	1.3e-05	-0.23	0.00062	-0.17	0.0095	0.12	0.08	-0.18	0.0053	-0.11	0.09	0.92	2.2e-92	0.48	1.5e-14	0.39	1.3e-09	-0.32	7.5e-07
P2RY13	blue	-0.1	0.12	0.1	0.12	-0.054	0.41	-0.22	0.0008	-0.17	0.0088	-0.031	0.64	-0.049	0.47	0.033	0.62	0.73	4.1e-39	0.61	9.5e-25	0.46	2e-13	-0.17	0.0084
P2RY14	blue	0.46	2.4e-13	-0.46	2.4e-13	0.34	1.8e-07	0.24	0.00029	0.49	2.3e-15	-0.56	1.8e-20	-0.59	1.7e-22	-0.29	1.2e-05	0.42	4.9e-11	-0.078	0.24	-0.13	0.059	-0.44	3.4e-12
P2RY8	blue	0.021	0.76	-0.021	0.76	-0.17	0.0084	-0.15	0.021	-0.09	0.17	-0.053	0.43	-0.3	5.5e-06	-0.096	0.15	0.93	9.7e-100	0.42	5.9e-11	0.28	1.4e-05	-0.43	2e-11
PACSIN3	blue	0.3	3.5e-06	-0.3	3.5e-06	0.39	7.3e-10	0.13	0.049	0.36	1.9e-08	-0.12	0.076	-0.092	0.16	-0.29	1e-05	-0.57	7.6e-21	-0.49	3.4e-15	-0.32	6.6e-07	0.18	0.007
PAG1	blue	-0.37	9e-09	0.37	9e-09	-0.27	3.8e-05	-0.38	3.2e-09	-0.57	5.3e-21	0.22	0.00068	0.43	1.5e-11	0.39	9.1e-10	0.62	8.9e-26	0.7	6e-35	0.56	1.6e-20	0.15	0.021
PARP8	blue	-0.025	0.7	0.025	0.7	-0.093	0.16	-0.056	0.4	-0.1	0.13	-0.088	0.18	-0.18	0.0059	0.046	0.49	0.72	3.8e-37	0.46	3.4e-13	0.41	1.2e-10	-0.31	1.7e-06
PASK	blue	0.14	0.033	-0.14	0.033	-0.28	1.2e-05	-0.15	0.028	0.1	0.13	0.087	0.19	-0.42	5.2e-11	-0.35	5.9e-08	0.72	2.8e-38	0.15	0.02	0.12	0.079	-0.41	7.5e-11
PAX5	blue	0.13	0.043	-0.13	0.043	-0.15	0.026	-0.16	0.013	-0.00025	1	-0.019	0.77	-0.27	4.1e-05	-0.24	0.00031	0.73	3.5e-39	0.19	0.0047	0.12	0.068	-0.3	4.4e-06
PCED1B	blue	-0.24	0.00025	0.24	0.00025	-0.3	3.2e-06	-0.4	2.2e-10	-0.37	1e-08	0.2	0.0031	0.067	0.32	0.075	0.26	0.83	4.2e-59	0.58	7.4e-22	0.55	2e-19	-0.11	0.1
PDZD8	blue	0.38	3.3e-09	-0.38	3.3e-09	0.074	0.26	0.17	0.0096	0.43	8.6e-12	-0.23	0.00052	-0.035	0.59	-0.15	0.027	-0.54	8.2e-19	-0.45	9.2e-13	-0.45	1.1e-12	0.22	0.001
PECAM1	blue	-0.21	0.0014	0.21	0.0014	0.26	8.1e-05	0.024	0.72	-0.21	0.0016	-0.38	4.1e-09	-0.082	0.22	0.38	4.6e-09	0.53	7.5e-18	0.44	3.1e-12	0.16	0.018	-0.33	3.8e-07
PIK3CD	blue	-0.28	1.4e-05	0.28	1.4e-05	-0.2	0.0025	-0.41	9.1e-11	-0.51	3.3e-16	0.26	7.1e-05	0.34	1.8e-07	0.19	0.005	0.55	4e-19	0.48	3e-14	0.44	2.6e-12	0.092	0.16
PIK3CG	blue	-0.13	0.049	0.13	0.049	-0.22	0.00096	-0.23	0.00036	-0.27	3.8e-05	0.069	0.3	-0.087	0.19	0.091	0.17	0.91	2.5e-87	0.61	2.1e-24	0.44	6.1e-12	-0.29	7.2e-06
PIM2	blue	-0.31	1.3e-06	0.31	1.3e-06	-0.25	0.0001	-0.14	0.029	-0.35	6.1e-08	0.17	0.012	-0.034	0.61	0.067	0.31	0.76	7.1e-44	0.52	3.9e-17	0.41	8.6e-11	-0.27	2.8e-05
PLA1A	blue	-0.08	0.23	0.08	0.23	0.045	0.5	-0.13	0.054	-0.21	0.0015	-0.021	0.75	-0.11	0.084	0.046	0.49	0.65	5.6e-29	0.44	3.8e-12	0.39	6.4e-10	-0.31	1.3e-06
PLA2G2D	blue	0.079	0.23	-0.079	0.23	-0.14	0.036	-0.12	0.062	-0.011	0.87	0.033	0.62	-0.27	2.5e-05	-0.23	0.00046	0.7	2.2e-34	0.21	0.0015	0.17	0.011	-0.31	1.4e-06
PLAAT4	blue	0.012	0.86	-0.012	0.86	0.026	0.7	0.035	0.6	-0.0038	0.95	-0.13	0.056	-0.26	8.9e-05	-0.085	0.2	0.58	2.9e-22	0.37	5.5e-09	0.5	1.6e-15	-0.32	5.8e-07
PLEK	blue	-0.17	0.011	0.17	0.011	-0.18	0.0067	-0.28	1.8e-05	-0.36	2.9e-08	0.16	0.017	0.08	0.23	0.097	0.15	0.7	3.2e-35	0.69	7.3e-34	0.44	3.7e-12	-0.17	0.01
PLEKHO1	blue	-0.22	0.00066	0.22	0.00066	-0.011	0.87	-0.3	4.1e-06	-0.45	1.2e-12	0.00027	1	0.15	0.024	0.39	9.2e-10	0.75	8.4e-43	0.75	4.9e-42	0.49	5.9e-15	-0.21	0.0012
PNOC	blue	0.034	0.61	-0.034	0.61	-0.19	0.0033	-0.049	0.47	-0.058	0.39	0.013	0.84	-0.32	1.1e-06	-0.16	0.016	0.75	3.1e-43	0.25	0.00011	0.1	0.13	-0.44	2.2e-12
POU2AF1	blue	-0.18	0.0051	0.18	0.0051	-0.22	0.00072	-0.05	0.45	-0.23	0.0005	0.077	0.25	-0.17	0.012	0.014	0.83	0.8	3e-51	0.42	5.5e-11	0.3	3.3e-06	-0.37	8.5e-09
PPP1R16B	blue	0.077	0.25	-0.077	0.25	-0.044	0.51	-0.13	0.052	-0.013	0.85	-0.14	0.03	-0.36	2e-08	-0.14	0.036	0.93	2.5e-101	0.39	8.1e-10	0.28	1.8e-05	-0.46	2.7e-13
PPP1R18	blue	-0.51	3.1e-16	0.51	3.1e-16	-0.22	0.00064	-0.45	5.6e-13	-0.7	2.6e-35	0.31	1.6e-06	0.5	1.6e-15	0.44	4.6e-12	0.58	1.3e-21	0.73	7.5e-39	0.6	1.7e-23	0.12	0.067
PREX1	blue	-0.17	0.012	0.17	0.012	-0.062	0.35	-0.2	0.0023	-0.3	3.3e-06	-0.099	0.14	-0.041	0.53	0.23	0.0006	0.88	2.3e-73	0.75	4.9e-42	0.47	6.4e-14	-0.3	3.9e-06
PRF1	blue	-0.29	7.1e-06	0.29	7.1e-06	-0.2	0.0023	-0.29	6.4e-06	-0.31	2.3e-06	0.16	0.016	0.043	0.52	-0.0013	0.98	0.7	1.3e-34	0.64	6.1e-28	0.69	4.6e-34	-0.073	0.27
PRKACB	blue	0.27	4.6e-05	-0.27	4.6e-05	0.014	0.83	0.23	0.00057	0.0066	0.92	-0.22	0.00092	-0.24	0.00022	0.069	0.3	0.57	6.4e-21	0.21	0.0013	0.026	0.7	-0.49	2.9e-15
PRKCB	blue	0.039	0.56	-0.039	0.56	-0.16	0.016	-0.2	0.002	-0.1	0.12	-0.03	0.65	-0.24	0.00021	-0.098	0.14	0.93	2.3e-103	0.47	8.9e-14	0.3	4.6e-06	-0.37	1.1e-08
PSMB10	blue	-0.27	4e-05	0.27	4e-05	-0.22	0.00084	-0.31	1.7e-06	-0.28	1.3e-05	0.19	0.0042	0.073	0.27	-0.06	0.37	0.6	8.4e-24	0.51	8.5e-17	0.72	3e-37	0.03	0.65
PTGDS	blue	0.36	3e-08	-0.36	3e-08	0.085	0.2	0.24	0.0003	0.35	5.9e-08	-0.4	2.3e-10	-0.61	1.6e-24	-0.27	4.9e-05	0.58	2.7e-22	-0.021	0.75	-0.13	0.045	-0.6	1.7e-23
PTPN22	blue	-0.23	0.00053	0.23	0.00053	-0.29	5.9e-06	-0.32	7.1e-07	-0.31	2.7e-06	0.16	0.013	-0.0055	0.93	0.044	0.51	0.84	6.6e-62	0.67	4.5e-31	0.59	1e-22	-0.14	0.029
PTPN6	blue	0.017	0.8	-0.017	0.8	-0.17	0.0085	-0.17	0.01	-0.1	0.12	-0.0018	0.98	-0.26	6e-05	-0.12	0.066	0.85	1.7e-64	0.44	1.9e-12	0.32	8.9e-07	-0.42	5.5e-11
PTPRC	blue	-0.14	0.042	0.14	0.042	-0.21	0.0011	-0.28	2.1e-05	-0.28	1.4e-05	0.097	0.14	-0.052	0.43	0.063	0.34	0.93	3.8e-103	0.69	5.4e-33	0.52	6.9e-17	-0.25	0.00018
PTPRCAP	blue	0.0044	0.95	-0.0044	0.95	-0.16	0.018	-0.19	0.0036	-0.034	0.61	-0.031	0.64	-0.34	1.4e-07	-0.18	0.0062	0.9	8.9e-84	0.38	4.1e-09	0.32	5.8e-07	-0.41	7.1e-11
PVRIG	blue	-0.031	0.64	0.031	0.64	-0.22	0.00078	-0.25	0.00017	-0.092	0.17	0.032	0.64	-0.27	4.1e-05	-0.13	0.05	0.87	1.6e-71	0.44	2.9e-12	0.4	3.7e-10	-0.35	3.8e-08
PYHIN1	blue	-0.08	0.23	0.08	0.23	-0.21	0.0016	-0.24	0.00026	-0.13	0.056	0.0042	0.95	-0.2	0.0027	-0.072	0.28	0.89	5.2e-77	0.51	2.6e-16	0.45	1.5e-12	-0.27	3e-05
RAB27A	blue	0.28	1.6e-05	-0.28	1.6e-05	-0.091	0.17	0.18	0.0068	0.16	0.016	-0.15	0.026	-0.4	5.1e-10	-0.18	0.0054	0.57	4e-21	0.23	0.00039	0.064	0.34	-0.5	4.8e-16
RAB8B	blue	-0.37	1.2e-08	0.37	1.2e-08	-0.28	2.2e-05	-0.34	1.5e-07	-0.62	1.9e-25	0.26	5.3e-05	0.46	1.6e-13	0.38	3.4e-09	0.57	4.3e-21	0.74	1.9e-40	0.55	9.3e-20	0.12	0.072
RAC2	blue	-0.4	3.6e-10	0.4	3.6e-10	-0.33	4.9e-07	-0.37	6.9e-09	-0.59	4.5e-23	0.32	5.4e-07	0.3	5.8e-06	0.23	0.00036	0.78	1.4e-48	0.72	2.6e-38	0.59	1.7e-22	-0.034	0.61
RASAL3	blue	-0.023	0.73	0.023	0.73	-0.091	0.17	-0.17	0.01	-0.048	0.47	-0.076	0.25	-0.33	4.8e-07	-0.12	0.061	0.77	1.3e-46	0.31	1.3e-06	0.26	5.6e-05	-0.4	6.1e-10
RASGRP1	blue	-0.0074	0.91	0.0074	0.91	-0.26	6.5e-05	-0.23	0.0004	0.16	0.017	-0.0054	0.94	-0.35	6.1e-08	-0.32	1.1e-06	0.61	1e-24	0.24	0.00025	0.29	9e-06	-0.15	0.027
RASSF2	blue	0.075	0.26	-0.075	0.26	-0.023	0.73	-0.14	0.031	-0.029	0.66	-0.16	0.015	-0.32	6.7e-07	-0.0039	0.95	0.85	2.7e-64	0.46	2.3e-13	0.22	0.00092	-0.47	1e-13
RCSD1	blue	0.027	0.68	-0.027	0.68	0.12	0.074	-0.16	0.014	-0.12	0.063	-0.18	0.0051	-0.22	0.00085	0.051	0.45	0.89	7.7e-79	0.51	3e-16	0.32	7.5e-07	-0.38	4.7e-09
RESF1	blue	-0.21	0.0016	0.21	0.0016	-0.2	0.0025	-0.2	0.0022	-0.27	2.6e-05	0.098	0.14	0.016	0.81	0.075	0.26	0.67	2.3e-31	0.52	4.9e-17	0.39	1.1e-09	-0.13	0.052
RGL1	blue	-0.068	0.31	0.068	0.31	0.22	0.00091	0.037	0.58	-0.068	0.31	-0.42	2.3e-11	-0.23	0.00039	0.27	2.9e-05	0.51	1.4e-16	0.41	1.9e-10	0.22	0.0007	-0.39	8.4e-10
RGS13	blue	0.3	3.6e-06	-0.3	3.6e-06	-0.025	0.71	-0.0054	0.94	0.15	0.022	-0.18	0.006	-0.37	6.2e-09	-0.14	0.038	0.63	1.1e-26	0.096	0.15	-0.05	0.46	-0.4	3.2e-10
RGS19	blue	-0.33	3.7e-07	0.33	3.7e-07	-0.26	5.3e-05	-0.36	2.2e-08	-0.51	1.1e-16	0.2	0.0025	0.25	0.00016	0.25	0.00019	0.76	1.5e-43	0.71	6.2e-37	0.55	1.2e-19	-0.054	0.41
RHOH	blue	-0.22	0.00072	0.22	0.00072	-0.29	1.2e-05	-0.22	0.00075	-0.35	7.9e-08	0.14	0.036	-0.002	0.98	0.052	0.43	0.91	9e-90	0.63	8.5e-27	0.49	3.9e-15	-0.22	0.00093
RILPL2	blue	-0.17	0.012	0.17	0.012	-0.11	0.092	0.1	0.12	-0.39	1.6e-09	0.022	0.75	0.026	0.7	0.21	0.0016	0.6	4.8e-24	0.61	4.8e-25	0.33	3.8e-07	-0.39	1.2e-09
RIPOR2	blue	0.088	0.18	-0.088	0.18	-0.041	0.54	-0.15	0.028	-0.12	0.062	-0.097	0.14	-0.15	0.025	-0.018	0.79	0.81	5.2e-55	0.49	4.5e-15	0.23	0.00051	-0.32	6.3e-07
RNASE6	blue	-0.3	2.9e-06	0.3	2.9e-06	-0.11	0.093	-0.23	0.00045	-0.4	4.5e-10	0.03	0.66	0.069	0.3	0.29	1.2e-05	0.85	6.7e-64	0.75	4.2e-43	0.58	1.6e-21	-0.19	0.0036
RNF125	blue	0.39	1.3e-09	-0.39	1.3e-09	0.27	3.4e-05	0.29	8.5e-06	0.39	1.2e-09	-0.55	4e-19	-0.62	4.2e-26	-0.19	0.0044	0.52	3.4e-17	-0.0098	0.88	-0.15	0.024	-0.6	4.7e-24
RNF166	blue	-0.19	0.0036	0.19	0.0036	-0.12	0.073	-0.22	0.0011	-0.29	6.1e-06	0.0071	0.92	-0.039	0.55	0.17	0.011	0.81	3.4e-53	0.63	8.8e-27	0.43	6.3e-12	-0.28	1.6e-05
RUBCNL	blue	-0.16	0.015	0.16	0.015	-0.14	0.033	-0.27	3.8e-05	-0.4	3.4e-10	0.099	0.14	0.1	0.12	0.29	9.4e-06	0.77	2e-46	0.67	2e-31	0.4	2.4e-10	-0.26	9.4e-05
RUNX3	blue	-0.36	2.5e-08	0.36	2.5e-08	-0.28	2.4e-05	-0.33	3.9e-07	-0.47	6.3e-14	0.26	6.9e-05	0.098	0.14	0.12	0.062	0.8	1.8e-51	0.67	5.3e-31	0.58	8.9e-22	-0.17	0.0095
SASH3	blue	-0.16	0.018	0.16	0.018	-0.19	0.0038	-0.29	6.1e-06	-0.25	0.00012	0.066	0.32	-0.14	0.037	-0.0071	0.92	0.95	7.4e-118	0.6	5.3e-24	0.48	8.9e-15	-0.31	1.5e-06
SATB1	blue	0.22	0.00087	-0.22	0.00087	0.036	0.59	0.25	0.00013	0.067	0.32	-0.31	2.6e-06	-0.37	5.3e-09	-0.0045	0.95	0.67	7.7e-31	0.27	4.3e-05	0.057	0.39	-0.57	4.8e-21
SEL1L3	blue	-0.1	0.11	0.1	0.11	-0.17	0.009	0.22	0.0011	-0.23	0.00036	0.0099	0.88	-0.13	0.048	0.0039	0.95	0.7	1e-34	0.36	2.5e-08	0.19	0.0031	-0.39	8.6e-10
SELL	blue	-0.16	0.016	0.16	0.016	-0.2	0.0026	-0.25	0.00011	-0.32	1e-06	0.076	0.26	0.034	0.61	0.062	0.36	0.87	2e-71	0.67	4.1e-31	0.49	5.3e-15	-0.17	0.01
SEPTIN1	blue	0.054	0.42	-0.054	0.42	-0.15	0.024	-0.19	0.0037	-0.022	0.74	-0.052	0.44	-0.33	4.4e-07	-0.18	0.0077	0.89	7e-81	0.38	3.9e-09	0.32	7.6e-07	-0.4	5e-10
SEPTIN10	blue	0.33	4.4e-07	-0.33	4.4e-07	4.4e-05	1	0.089	0.18	0.36	1.6e-08	0.017	0.8	-0.018	0.79	-0.21	0.0011	-0.6	2.1e-23	-0.53	1.4e-17	-0.44	3.6e-12	0.24	0.00031
SEPTIN6	blue	-0.014	0.84	0.014	0.84	-0.09	0.17	-0.17	0.0081	-0.19	0.0044	-0.069	0.3	-0.16	0.015	0.079	0.23	0.91	4e-88	0.53	3.3e-18	0.38	4.9e-09	-0.38	2.4e-09
SERPINB9	blue	-0.14	0.029	0.14	0.029	-0.25	0.00014	-0.27	2.9e-05	-0.27	4.2e-05	0.16	0.013	0.074	0.27	0.042	0.52	0.71	9.1e-37	0.59	4.6e-23	0.47	1e-13	-0.11	0.11
SH2D1A	blue	-0.022	0.74	0.022	0.74	-0.19	0.0039	-0.24	0.00021	-0.081	0.22	0.0084	0.9	-0.24	0.0002	-0.17	0.012	0.87	4.5e-70	0.45	1.1e-12	0.42	2.2e-11	-0.27	4.7e-05
SH3KBP1	blue	-0.12	0.075	0.12	0.075	0.071	0.28	-0.11	0.091	-0.32	1.1e-06	-0.15	0.021	-0.024	0.71	0.28	1.4e-05	0.75	2.7e-42	0.52	3.7e-17	0.34	1.9e-07	-0.35	7.4e-08
SIDT1	blue	0.27	2.9e-05	-0.27	2.9e-05	-0.099	0.14	0.21	0.0011	0.21	0.0013	-0.21	0.0016	-0.49	1.9e-15	-0.26	5.3e-05	0.7	2.7e-34	0.16	0.017	0.098	0.14	-0.54	1.1e-18
SIT1	blue	0.11	0.11	-0.11	0.11	-0.15	0.021	-0.16	0.018	0.11	0.11	-0.081	0.22	-0.43	1.5e-11	-0.3	5.8e-06	0.8	7.2e-53	0.23	0.00036	0.21	0.0017	-0.39	9.4e-10
SKAP1	blue	-0.031	0.65	0.031	0.65	-0.13	0.044	-0.11	0.088	-0.053	0.42	-0.12	0.078	-0.34	9.7e-08	-0.13	0.044	0.85	5e-65	0.35	4.4e-08	0.31	1.6e-06	-0.42	2.3e-11
SLA	blue	-0.36	2.3e-08	0.36	2.3e-08	-0.16	0.016	-0.33	5.2e-07	-0.47	3.2e-14	0.096	0.15	0.19	0.0041	0.33	4.6e-07	0.78	1.9e-48	0.83	7.1e-59	0.61	2.5e-24	-0.072	0.28
SLAMF6	blue	-0.029	0.67	0.029	0.67	-0.13	0.047	-0.15	0.025	-0.1	0.13	-0.085	0.2	-0.27	2.7e-05	-0.054	0.42	0.88	4.8e-75	0.43	1.7e-11	0.33	2.4e-07	-0.39	1.1e-09
SLAMF7	blue	-0.29	6.6e-06	0.29	6.6e-06	-0.28	1.3e-05	-0.13	0.051	-0.25	0.00011	0.096	0.15	-0.076	0.25	-0.0083	0.9	0.75	6.9e-43	0.48	8.7e-15	0.46	3.6e-13	-0.19	0.0045
SLC39A10	blue	-0.24	0.00019	0.24	0.00019	-0.13	0.052	-0.2	0.0029	-0.47	5.7e-14	0.17	0.012	0.15	0.023	0.29	1.1e-05	0.61	4.4e-25	0.46	3.6e-13	0.25	0.00011	-0.2	0.002
SLC40A1	blue	0.18	0.007	-0.18	0.007	0.25	0.00012	0.075	0.26	0.22	0.001	-0.45	7.2e-13	-0.5	1.3e-15	-0.039	0.56	0.53	1.3e-17	0.12	0.081	0.017	0.8	-0.48	7.9e-15
SLFN11	blue	-0.42	3.5e-11	0.42	3.5e-11	-0.11	0.1	-0.19	0.0034	-0.56	2.2e-20	0.22	0.00071	0.21	0.0017	0.44	5.9e-12	0.63	3.1e-26	0.64	6.6e-28	0.54	9.6e-19	-0.24	0.00023
SMAP2	blue	-0.28	1.5e-05	0.28	1.5e-05	-0.17	0.0083	-0.19	0.0032	-0.37	8.2e-09	-0.0085	0.9	0.064	0.34	0.25	0.0001	0.8	2.9e-52	0.68	4.8e-32	0.44	5.8e-12	-0.18	0.0078
SPAG4	blue	-0.33	5e-07	0.33	5e-07	-0.19	0.0037	-0.075	0.26	-0.35	5.8e-08	0.13	0.056	0.0095	0.89	0.16	0.014	0.6	1.6e-23	0.42	5.3e-11	0.29	1.2e-05	-0.23	0.00042
SPIB	blue	0.091	0.17	-0.091	0.17	-0.15	0.023	-0.13	0.054	-0.04	0.55	0.12	0.077	-0.31	1.2e-06	-0.28	2.5e-05	0.63	9.9e-27	0.18	0.0064	0.14	0.039	-0.43	8.2e-12
SPOCK2	blue	-0.1	0.13	0.1	0.13	-0.16	0.018	-0.22	0.00071	-0.17	0.0088	0.054	0.42	-0.21	0.0012	-0.1	0.12	0.81	1.5e-53	0.45	1.6e-12	0.41	1.2e-10	-0.34	1.1e-07
SSR4	blue	-0.075	0.26	0.075	0.26	-0.13	0.049	0.2	0.0026	-0.11	0.098	-0.075	0.26	-0.32	1e-06	-0.00078	0.99	0.63	3e-26	0.23	0.00039	0.088	0.18	-0.54	2.2e-18
ST6GAL1	blue	-0.14	0.041	0.14	0.041	-0.17	0.01	0.0037	0.96	-0.23	0.00037	0.11	0.11	-0.17	0.011	0.015	0.82	0.72	2e-38	0.36	2.2e-08	0.23	0.00052	-0.4	2.4e-10
ST8SIA4	blue	-0.25	0.0001	0.25	0.0001	-0.27	3.4e-05	-0.26	5.5e-05	-0.41	1.1e-10	0.2	0.0022	0.067	0.31	0.13	0.042	0.87	2.5e-72	0.76	1e-43	0.58	3.9e-22	-0.2	0.0019
STAP1	blue	0.15	0.028	-0.15	0.028	-0.15	0.022	-0.12	0.081	0.0096	0.88	-0.011	0.87	-0.34	1.9e-07	-0.22	0.0011	0.82	1.9e-57	0.24	0.00029	0.15	0.028	-0.43	1.8e-11
STK17B	blue	-0.3	5.6e-06	0.3	5.6e-06	-0.38	2.7e-09	-0.3	2.9e-06	-0.51	3.6e-16	0.32	1e-06	0.23	0.00045	0.17	0.0087	0.78	1.5e-48	0.66	6e-30	0.52	3.4e-17	-0.068	0.31
SYK	blue	0.14	0.031	-0.14	0.031	-0.24	0.00025	-0.13	0.057	0.2	0.0022	0.1	0.12	-0.49	4e-15	-0.4	4.7e-10	0.56	1.5e-20	0.094	0.16	0.088	0.19	-0.39	8.6e-10
TAGAP	blue	-0.1	0.13	0.1	0.13	-0.24	0.00034	-0.2	0.0022	-0.19	0.0038	0.061	0.36	-0.13	0.059	-0.044	0.51	0.87	2.5e-71	0.59	1.2e-22	0.41	7.7e-11	-0.29	1.1e-05
TAPBPL	blue	-0.17	0.0084	0.17	0.0084	-0.22	0.00069	0.015	0.83	-0.26	9.1e-05	0.095	0.15	-0.023	0.73	0.029	0.66	0.55	1.2e-19	0.45	1.2e-12	0.49	1.8e-15	-0.22	0.00082
TBC1D10C	blue	0.19	0.0043	-0.19	0.0043	-0.054	0.42	-0.11	0.086	0.11	0.11	-0.21	0.0014	-0.43	8.3e-12	-0.22	0.00064	0.85	3.5e-66	0.3	5.1e-06	0.21	0.0016	-0.46	3.9e-13
TCL1A	blue	0.26	7.2e-05	-0.26	7.2e-05	-0.12	0.082	-0.063	0.34	0.13	0.059	-0.094	0.16	-0.36	3.5e-08	-0.29	9.5e-06	0.72	5.4e-38	0.13	0.046	0.067	0.32	-0.35	3.8e-08
TENT5C	blue	-0.16	0.016	0.16	0.016	-0.089	0.18	0.12	0.06	-0.18	0.0066	-0.044	0.51	-0.22	0.0011	0.032	0.63	0.71	7e-37	0.35	4.4e-08	0.24	0.00023	-0.43	1.7e-11
THEMIS	blue	-0.011	0.87	0.011	0.87	-0.19	0.0036	-0.2	0.0027	-0.077	0.25	0.0074	0.91	-0.28	1.6e-05	-0.11	0.086	0.85	1.3e-64	0.44	1.8e-12	0.37	6.2e-09	-0.36	1.7e-08
TIGIT	blue	-0.27	2.6e-05	0.27	2.6e-05	-0.26	9e-05	-0.35	7.5e-08	-0.31	2e-06	0.15	0.024	-0.015	0.82	0.022	0.75	0.83	2e-59	0.62	5e-26	0.59	7.1e-23	-0.14	0.029
TLR1	blue	-0.18	0.0068	0.18	0.0068	-0.3	3.8e-06	-0.17	0.0092	-0.36	3.3e-08	0.3	3.4e-06	0.06	0.37	0.071	0.29	0.66	1e-29	0.68	1.5e-32	0.49	1.9e-15	-0.22	0.0011
TLR10	blue	0.17	0.0093	-0.17	0.0093	-0.18	0.0052	-0.13	0.046	0.02	0.77	0.013	0.84	-0.34	2e-07	-0.25	0.00011	0.8	8.3e-52	0.22	0.00071	0.12	0.068	-0.42	5.8e-11
TMC8	blue	-0.2	0.0023	0.2	0.0023	-0.27	3e-05	-0.36	1.7e-08	-0.26	5.4e-05	0.18	0.0052	-0.091	0.17	-0.065	0.33	0.83	3.1e-59	0.49	5.8e-15	0.48	1.1e-14	-0.23	0.00058
TMEM163	blue	0.017	0.8	-0.017	0.8	-0.19	0.0048	-0.16	0.013	-0.2	0.0022	0.16	0.013	-0.11	0.11	0.0046	0.94	0.65	7.7e-29	0.39	1.1e-09	0.18	0.0055	-0.34	1.8e-07
TMEM173	blue	-0.24	0.0003	0.24	0.0003	-0.19	0.0039	-0.19	0.0051	-0.28	1.7e-05	0.061	0.36	0.023	0.73	0.12	0.067	0.59	3.3e-23	0.5	1.2e-15	0.49	3.6e-15	-0.2	0.0024
TMEM243	blue	0.23	0.00051	-0.23	0.00051	-0.032	0.63	0.21	0.0017	0.098	0.14	-0.17	0.011	-0.49	2.2e-15	-0.13	0.057	0.65	4.3e-29	0.13	0.052	-0.09	0.18	-0.65	1.1e-28
TNFRSF17	blue	-0.082	0.22	0.082	0.22	-0.15	0.026	0.13	0.045	-0.082	0.22	-0.04	0.55	-0.32	1.2e-06	-0.076	0.25	0.72	1.2e-37	0.26	7.3e-05	0.17	0.0099	-0.47	4.9e-14
TNFRSF1B	blue	-0.32	1.1e-06	0.32	1.1e-06	-0.088	0.18	-0.29	8.5e-06	-0.42	2.5e-11	0.029	0.66	0.11	0.095	0.26	8.6e-05	0.76	7e-44	0.81	3.4e-54	0.61	3.3e-24	-0.17	0.0091
TNFSF8	blue	-0.17	0.0083	0.17	0.0083	-0.087	0.19	-0.24	0.00029	-0.28	1.8e-05	-0.066	0.32	0.0084	0.9	0.18	0.0052	0.78	2.7e-48	0.62	4.6e-26	0.43	8.6e-12	-0.16	0.016
TOX	blue	-0.16	0.019	0.16	0.019	-0.17	0.011	-0.22	0.0008	-0.37	5.1e-09	0.14	0.031	0.16	0.016	0.21	0.0015	0.67	1.7e-30	0.46	4.3e-13	0.39	1.6e-09	-0.12	0.062
TRAC	blue	-0.15	0.023	0.15	0.023	-0.22	0.00064	-0.29	7.6e-06	-0.21	0.0013	0.1	0.13	-0.2	0.0031	-0.048	0.47	0.93	1.3e-98	0.54	2.2e-18	0.5	9.1e-16	-0.34	1.9e-07
TRAF3IP3	blue	0.083	0.21	-0.083	0.21	-0.13	0.044	-0.14	0.038	-0.0088	0.89	-0.11	0.11	-0.35	5.1e-08	-0.16	0.016	0.92	5.1e-93	0.38	3.5e-09	0.27	3.2e-05	-0.43	1.4e-11
TRANK1	blue	-0.31	1.7e-06	0.31	1.7e-06	-0.2	0.0022	-0.34	1e-07	-0.39	8.6e-10	0.1	0.12	0.12	0.06	0.22	0.00094	0.75	4e-42	0.67	2.4e-31	0.73	6.3e-40	-0.057	0.39
TRAT1	blue	-0.0043	0.95	0.0043	0.95	-0.2	0.002	-0.21	0.0012	-0.081	0.22	-0.0078	0.91	-0.26	5.1e-05	-0.13	0.057	0.9	2.9e-85	0.45	7.4e-13	0.39	7.6e-10	-0.35	6.8e-08
TRBC1	blue	-0.17	0.012	0.17	0.012	-0.2	0.0029	-0.26	5.8e-05	-0.2	0.0024	0.05	0.45	-0.2	0.0026	-0.022	0.74	0.95	8.9e-112	0.55	1.1e-19	0.49	4.3e-15	-0.34	1.7e-07
TRG-AS1	blue	-0.097	0.15	0.097	0.15	-0.19	0.0049	-0.18	0.0053	-0.14	0.037	-0.002	0.98	-0.24	0.00021	-0.1	0.12	0.91	1.8e-88	0.48	1.2e-14	0.47	5.6e-14	-0.34	1.7e-07
TRIM52	blue	0.2	0.0022	-0.2	0.0022	0.062	0.35	0.14	0.032	0.02	0.77	-0.19	0.0039	-0.43	9.2e-12	-0.015	0.82	0.64	5e-28	0.19	0.0037	-0.0033	0.96	-0.66	2.2e-29
TSPAN33	blue	0.16	0.013	-0.16	0.013	0.057	0.39	0.12	0.067	0.18	0.0077	-0.35	5.3e-08	-0.48	2.6e-14	-0.18	0.0062	0.63	2.5e-26	0.18	0.0055	0.12	0.061	-0.46	1.5e-13
TSPOAP1-AS1	blue	0.16	0.018	-0.16	0.018	-0.18	0.0081	-0.13	0.044	0.037	0.58	-0.021	0.75	-0.37	8.6e-09	-0.28	1.3e-05	0.83	1.6e-58	0.26	6.2e-05	0.22	0.00081	-0.42	3.8e-11
TXK	blue	0.16	0.014	-0.16	0.014	-0.089	0.18	-0.13	0.046	0.08	0.23	-0.19	0.0037	-0.26	6.6e-05	-0.11	0.083	0.68	1.1e-32	0.28	1.6e-05	0.18	0.0079	-0.24	0.00025
UBA7	blue	0.1	0.13	-0.1	0.13	-0.02	0.77	-0.035	0.6	0.11	0.086	-0.18	0.0055	-0.44	3.6e-12	-0.18	0.0053	0.66	2.5e-29	0.28	1.8e-05	0.39	1.2e-09	-0.47	9.6e-14
UBASH3A	blue	-0.067	0.31	0.067	0.31	-0.18	0.0054	-0.2	0.0021	-0.13	0.053	0.067	0.31	-0.25	0.0001	-0.15	0.022	0.85	5.5e-65	0.44	3.8e-12	0.42	5.6e-11	-0.36	1.8e-08
UBD	blue	-0.31	1.3e-06	0.31	1.3e-06	-0.26	7.4e-05	-0.29	6.8e-06	-0.41	8.4e-11	0.32	5.7e-07	0.014	0.84	0.036	0.58	0.82	8.3e-56	0.64	3.6e-28	0.63	1e-26	-0.26	8.6e-05
UCP2	blue	-0.033	0.62	0.033	0.62	0.065	0.33	-0.074	0.27	-0.14	0.04	-0.11	0.11	-0.29	8.3e-06	0.012	0.86	0.84	9.6e-63	0.49	4.7e-15	0.32	8.3e-07	-0.51	1.8e-16
VAV1	blue	-0.0076	0.91	0.0076	0.91	-0.23	0.00049	-0.18	0.0051	-0.15	0.024	0.026	0.69	-0.22	0.001	-0.063	0.34	0.87	1.2e-70	0.49	6.5e-15	0.32	8.5e-07	-0.4	6.1e-10
VCAM1	blue	-0.079	0.24	0.079	0.24	-0.05	0.45	-0.14	0.041	-0.26	7e-05	0.021	0.75	-0.17	0.0098	0.22	0.00096	0.74	3.1e-40	0.54	2.2e-18	0.37	9.4e-09	-0.52	5.1e-17
VNN2	blue	-0.02	0.77	0.02	0.77	-0.13	0.048	-0.11	0.11	-0.25	0.00016	0.11	0.11	-0.026	0.7	0.015	0.82	0.6	4.5e-24	0.5	7e-16	0.19	0.0048	-0.27	3e-05
VPREB3	blue	0.27	5e-05	-0.27	5e-05	-0.14	0.041	-0.066	0.32	0.11	0.1	-0.027	0.69	-0.38	3.6e-09	-0.29	7.8e-06	0.67	1.3e-30	0.065	0.33	-0.012	0.86	-0.4	3e-10
WIPF1	blue	-0.31	1.4e-06	0.31	1.4e-06	-0.17	0.011	-0.32	9.5e-07	-0.49	4.5e-15	0.078	0.24	0.14	0.034	0.39	1.3e-09	0.88	1.9e-74	0.79	4.6e-50	0.55	1.3e-19	-0.21	0.0018
XBP1	blue	-0.047	0.48	0.047	0.48	0.04	0.55	0.37	8e-09	-0.11	0.11	-0.16	0.013	-0.31	1.4e-06	0.052	0.43	0.53	7.8e-18	0.17	0.0087	0.038	0.57	-0.59	9.9e-23
ZAP70	blue	-0.037	0.58	0.037	0.58	-0.11	0.11	-0.24	0.00031	-0.13	0.053	0.012	0.85	-0.25	0.00011	-0.13	0.053	0.88	2.8e-75	0.45	1.2e-12	0.43	1.1e-11	-0.36	1.5e-08
ZBP1	blue	-0.27	4.8e-05	0.27	4.8e-05	-0.25	0.00013	-0.26	8.4e-05	-0.34	1.5e-07	0.14	0.034	0.034	0.61	0.039	0.56	0.76	3.3e-44	0.62	2.8e-25	0.66	9e-30	-0.14	0.032
ZC3H12D	blue	-0.15	0.023	0.15	0.023	-0.21	0.0011	-0.3	3.9e-06	-0.24	0.00028	0.048	0.48	-0.1	0.11	0.026	0.7	0.94	6.6e-110	0.59	6.1e-23	0.46	2.8e-13	-0.25	0.00015
ZFYVE21	blue	0.33	5.2e-07	-0.33	5.2e-07	0.17	0.0093	0.28	1.9e-05	0.45	1.1e-12	-0.32	1e-06	-0.057	0.39	-0.11	0.088	-0.55	2.6e-19	-0.54	5.3e-19	-0.45	7.3e-13	0.24	0.00025
ZNF101	blue	0.33	2.9e-07	-0.33	2.9e-07	-0.22	0.00072	-0.18	0.0054	0.2	0.0026	0.0048	0.94	-0.36	1.9e-08	-0.34	1.2e-07	0.62	1.3e-25	0.18	0.0074	0.13	0.043	-0.31	1.7e-06
ZNF267	blue	-0.26	8.8e-05	0.26	8.8e-05	-0.42	5.5e-11	-0.3	2.9e-06	-0.41	7.4e-11	0.46	2.9e-13	0.15	0.023	0.088	0.19	0.55	3.4e-19	0.53	5.9e-18	0.41	1.1e-10	-0.13	0.057
ZNF275	blue	-0.23	0.00049	0.23	0.00049	-0.0086	0.9	0.11	0.084	-0.45	1.2e-12	-0.063	0.35	0.082	0.22	0.48	1.4e-14	0.56	4.6e-20	0.48	3e-14	0.17	0.0089	-0.42	6.4e-11
ZNF439	blue	0.36	1.4e-08	-0.36	1.4e-08	0.11	0.11	0.19	0.0049	0.25	0.00012	-0.39	8.6e-10	-0.43	1.7e-11	-0.069	0.3	0.46	1.5e-13	-0.016	0.82	-0.23	0.0005	-0.49	4.3e-15
ABCA5	brown	0.55	2e-19	-0.55	2e-19	0.16	0.014	0.29	6.7e-06	0.63	1.5e-26	-0.31	1.3e-06	-0.7	7.1e-35	-0.51	1e-16	-0.084	0.21	-0.56	1.4e-20	-0.48	1.6e-14	-0.44	4.2e-12
ABHD14B	brown	0.51	2e-16	-0.51	2e-16	0.19	0.0031	0.38	3.9e-09	0.62	1.5e-25	-0.5	1.2e-15	-0.73	2.1e-39	-0.42	4.2e-11	0.13	0.053	-0.35	3.6e-08	-0.41	1.7e-10	-0.55	3.7e-19
ABI3BP	brown	0.51	1.4e-16	-0.51	1.4e-16	0.41	8.3e-11	0.34	9.7e-08	0.48	2.1e-14	-0.59	1.9e-22	-0.67	2.9e-31	-0.11	0.086	0.28	1.7e-05	-0.2	0.0026	-0.41	8.6e-11	-0.69	7.8e-34
ABL2	brown	-0.61	2.6e-24	0.61	2.6e-24	-0.19	0.0041	-0.3	2.9e-06	-0.75	2e-42	0.36	2.1e-08	0.89	1.7e-80	0.64	6.5e-28	-0.1	0.11	0.52	5.1e-17	0.42	4.7e-11	0.57	3.3e-21
ACADSB	brown	0.61	1e-24	-0.61	1e-24	0.23	0.00047	0.48	2.9e-14	0.68	1.1e-32	-0.41	1.1e-10	-0.8	4.3e-51	-0.56	2.4e-20	0.025	0.71	-0.5	6.7e-16	-0.49	2.5e-15	-0.59	2.4e-22
ACKR3	brown	-0.41	2e-10	0.41	2e-10	-0.091	0.17	-0.17	0.012	-0.52	2e-17	0.35	5e-08	0.62	3.5e-25	0.49	4.8e-15	-0.22	0.00071	0.29	9e-06	0.22	0.00072	0.36	1.8e-08
ACOT9	brown	-0.57	2e-21	0.57	2e-21	-0.072	0.28	-0.25	0.00017	-0.78	2e-48	0.29	1.1e-05	0.78	9.8e-48	0.68	1.1e-31	0.064	0.34	0.58	6.3e-22	0.45	1.3e-12	0.38	2.6e-09
ACTN1	brown	-0.52	4.8e-17	0.52	4.8e-17	-0.086	0.2	-0.28	1.8e-05	-0.7	1.8e-34	0.25	0.00016	0.87	2.9e-72	0.69	5.2e-34	-0.11	0.096	0.49	4.6e-15	0.38	1.8e-09	0.56	6.5e-20
ADAM10	brown	-0.4	4.9e-10	0.4	4.9e-10	-0.42	4.4e-11	-0.34	2.1e-07	-0.53	1.5e-17	0.55	2.8e-19	0.62	4.8e-26	0.26	7.2e-05	0.05	0.45	0.44	3.3e-12	0.44	2.4e-12	0.47	4.7e-14
ADM	brown	-0.47	3.8e-14	0.47	3.8e-14	-0.25	0.00016	-0.31	2.3e-06	-0.49	4.6e-15	0.3	3.7e-06	0.7	4.2e-35	0.44	3.1e-12	-0.2	0.003	0.35	3.6e-08	0.33	4.4e-07	0.57	2.4e-21
AFAP1L1	brown	-0.43	9.6e-12	0.43	9.6e-12	0.046	0.49	-0.29	8.3e-06	-0.44	5.1e-12	0.19	0.0038	0.68	1e-32	0.35	7.3e-08	-0.26	5.5e-05	0.23	0.00051	0.29	6.1e-06	0.67	6.9e-31
AFAP1L2	brown	-0.45	9.1e-13	0.45	9.1e-13	-0.26	7e-05	-0.38	2.6e-09	-0.41	1.1e-10	0.38	2.8e-09	0.68	4e-32	0.24	0.00019	-0.14	0.038	0.23	0.00045	0.46	2.7e-13	0.69	4.7e-34
AJUBA	brown	-0.43	8.4e-12	0.43	8.4e-12	-0.31	2.1e-06	-0.37	1.1e-08	-0.35	4.7e-08	0.47	6.6e-14	0.66	3.3e-30	0.19	0.0041	-0.33	4.8e-07	0.12	0.066	0.32	1.2e-06	0.74	3.8e-40
ALDH2	brown	0.39	1.6e-09	-0.39	1.6e-09	0.17	0.012	0.22	0.00069	0.53	4e-18	-0.38	3.6e-09	-0.67	1.7e-31	-0.44	2.8e-12	0.17	0.0083	-0.29	1.1e-05	-0.19	0.0032	-0.44	2.4e-12
ALDH3A2	brown	0.57	4e-21	-0.57	4e-21	0.19	0.0033	0.36	2.8e-08	0.75	9.9e-42	-0.27	4.5e-05	-0.76	1.3e-43	-0.57	9.4e-21	-0.19	0.0039	-0.65	1.2e-28	-0.59	3.4e-23	-0.45	1.1e-12
ALDH5A1	brown	0.25	0.00011	-0.25	0.00011	0.1	0.12	0.22	0.00068	0.34	2e-07	-0.18	0.0062	-0.67	1.1e-30	-0.38	3.9e-09	0.34	9.5e-08	-0.14	0.036	-0.18	0.0068	-0.6	5.5e-24
ALDH6A1	brown	0.54	1.4e-18	-0.54	1.4e-18	0.27	3.1e-05	0.56	1.7e-20	0.55	1.6e-19	-0.3	3.9e-06	-0.72	4.8e-38	-0.4	2.3e-10	-0.07	0.29	-0.53	5.8e-18	-0.59	9.8e-23	-0.66	1.9e-30
ALDH9A1	brown	0.62	2.4e-25	-0.62	2.4e-25	0.22	0.00082	0.33	2.4e-07	0.8	3.8e-51	-0.51	1.1e-16	-0.84	3.9e-62	-0.58	1.5e-21	-0.016	0.81	-0.55	3.9e-19	-0.48	7.6e-15	-0.51	2.7e-16
AMIGO2	brown	-0.36	2.1e-08	0.36	2.1e-08	-0.066	0.32	-0.23	0.0004	-0.57	2.4e-21	0.25	0.00012	0.73	1.8e-38	0.56	3.5e-20	0.013	0.85	0.38	2e-09	0.38	3.4e-09	0.41	7.3e-11
AMY1A	brown	0.58	9.1e-22	-0.58	9.1e-22	0.29	7.2e-06	0.48	2.9e-14	0.53	1.4e-17	-0.41	1e-10	-0.76	2.3e-44	-0.38	4e-09	0.24	0.00025	-0.31	1.3e-06	-0.41	1.7e-10	-0.76	1.4e-43
ANGPT2	brown	-0.58	1.1e-21	0.58	1.1e-21	-0.21	0.0012	-0.33	3.1e-07	-0.7	2e-35	0.41	1.4e-10	0.76	7e-44	0.52	4.4e-17	-0.028	0.67	0.47	3.6e-14	0.43	1.4e-11	0.43	1.3e-11
ANO1	brown	-0.44	5.1e-12	0.44	5.1e-12	-0.097	0.15	-0.0027	0.97	-0.48	2.3e-14	0.26	7.8e-05	0.65	3e-29	0.37	1.1e-08	-0.27	3.9e-05	0.2	0.0019	0.27	3.3e-05	0.5	4.4e-16
APBB2	brown	-0.5	1.6e-15	0.5	1.6e-15	-0.015	0.82	-0.25	0.00018	-0.62	1.5e-25	0.16	0.014	0.81	3.8e-55	0.72	1.9e-38	-0.22	0.001	0.35	4.6e-08	0.36	2.5e-08	0.56	3.9e-20
APCDD1L	brown	-0.29	7e-06	0.29	7e-06	-0.036	0.59	-0.16	0.014	-0.49	5.7e-15	0.19	0.0045	0.65	1.1e-28	0.53	1.1e-17	-0.19	0.0049	0.25	0.00016	0.13	0.055	0.37	5.7e-09
APP	brown	-0.56	2.9e-20	0.56	2.9e-20	-0.047	0.48	0.042	0.53	-0.67	2e-31	0.17	0.011	0.72	4.9e-38	0.64	3.4e-27	-0.16	0.013	0.36	2.1e-08	0.35	4.3e-08	0.38	2.6e-09
APPL1	brown	0.53	3.2e-18	-0.53	3.2e-18	0.21	0.0011	0.29	7.7e-06	0.59	1.1e-22	-0.36	1.7e-08	-0.73	2.4e-39	-0.41	2e-10	0.12	0.062	-0.33	5.2e-07	-0.44	3e-12	-0.56	3.5e-20
ARSI	brown	-0.32	1e-06	0.32	1e-06	-0.036	0.59	-0.26	8e-05	-0.4	3.8e-10	0.14	0.029	0.66	2.2e-30	0.51	1.2e-16	-0.27	3.8e-05	0.26	5.7e-05	0.23	0.00051	0.55	4.2e-19
ARSJ	brown	-0.47	3.8e-14	0.47	3.8e-14	-0.21	0.0016	-0.23	0.00051	-0.57	1.1e-20	0.38	2e-09	0.76	9.7e-44	0.44	4.4e-12	-0.22	0.00084	0.28	2.3e-05	0.32	5.9e-07	0.56	1.5e-20
ARTN	brown	-0.51	1.6e-16	0.51	1.6e-16	-0.25	0.00016	-0.29	1.1e-05	-0.56	1.7e-20	0.45	1.4e-12	0.72	5.2e-38	0.36	3.3e-08	-0.23	0.0006	0.29	8.4e-06	0.3	3e-06	0.58	3.1e-22
ATP13A3	brown	-0.56	5.9e-20	0.56	5.9e-20	-0.36	1.8e-08	-0.27	4.2e-05	-0.7	2.5e-35	0.63	4.8e-27	0.73	1.6e-38	0.38	2.9e-09	-0.023	0.73	0.52	2.9e-17	0.42	4.8e-11	0.41	1.1e-10
ATP6V0E2	brown	0.41	7.4e-11	-0.41	7.4e-11	0.2	0.0022	0.54	2.3e-18	0.32	6.6e-07	-0.39	1.8e-09	-0.67	9.4e-31	-0.26	9.2e-05	0.4	3.8e-10	-0.09	0.18	-0.22	0.00078	-0.78	6e-48
BASP1	brown	-0.37	8.7e-09	0.37	8.7e-09	-0.098	0.14	-0.3	5.4e-06	-0.57	5.9e-21	0.14	0.037	0.64	4e-28	0.57	3e-21	0.054	0.42	0.43	1.2e-11	0.25	0.00016	0.36	3.3e-08
BCKDHB	brown	0.61	1.4e-24	-0.61	1.4e-24	0.11	0.092	0.58	7.3e-22	0.63	5e-27	-0.28	2e-05	-0.62	1.6e-25	-0.44	3.2e-12	-0.24	0.00021	-0.59	5.8e-23	-0.56	2.6e-20	-0.48	2e-14
BCL11A	brown	0.38	3.7e-09	-0.38	3.7e-09	-0.096	0.15	0.12	0.077	0.5	8.6e-16	-0.043	0.52	-0.74	7.5e-41	-0.59	4.1e-23	0.23	0.00036	-0.35	5.6e-08	-0.28	1.4e-05	-0.55	2.8e-19
BCOR	brown	0.56	5.2e-20	-0.56	5.2e-20	0.017	0.8	0.12	0.08	0.54	1.7e-18	-0.17	0.0098	-0.72	4.3e-37	-0.52	1.8e-17	0.23	0.00039	-0.33	2.7e-07	-0.36	3.4e-08	-0.55	1.5e-19
BMP2	brown	-0.53	4.3e-18	0.53	4.3e-18	-0.21	0.0015	-0.3	5.7e-06	-0.52	2.4e-17	0.29	8.7e-06	0.71	6.3e-36	0.39	7.2e-10	-0.16	0.017	0.38	3.2e-09	0.36	1.4e-08	0.6	2.4e-23
BNC1	brown	-0.65	1.8e-28	0.65	1.8e-28	-0.3	5.3e-06	-0.4	3.5e-10	-0.56	4.7e-20	0.52	2.9e-17	0.8	1.4e-52	0.32	6.8e-07	-0.23	0.00038	0.31	1.3e-06	0.48	1.6e-14	0.81	2.6e-54
BRMS1	brown	-0.37	9.9e-09	0.37	9.9e-09	-0.19	0.0047	-0.25	0.00019	-0.41	2e-10	0.28	1.6e-05	0.67	1.5e-30	0.3	3.4e-06	-0.22	0.00081	0.22	0.00074	0.37	9.9e-09	0.6	8.8e-24
C1QTNF6	brown	-0.56	1.9e-20	0.56	1.9e-20	-0.16	0.013	-0.34	9.4e-08	-0.69	3.2e-33	0.28	2e-05	0.79	6.7e-50	0.76	6.7e-45	-0.038	0.57	0.53	1.3e-17	0.44	1.9e-12	0.45	1.1e-12
C3orf52	brown	-0.47	8.8e-14	0.47	8.8e-14	-0.32	6.8e-07	-0.28	1.4e-05	-0.54	1.5e-18	0.56	1.3e-20	0.68	5.9e-32	0.29	9.5e-06	-0.2	0.0023	0.31	2.1e-06	0.33	2.3e-07	0.52	2.9e-17
C6orf141	brown	-0.45	5.7e-13	0.45	5.7e-13	-0.27	2.7e-05	-0.32	1.2e-06	-0.5	1.3e-15	0.39	9e-10	0.66	4.2e-30	0.21	0.0014	-0.19	0.0045	0.22	0.0007	0.35	5.5e-08	0.6	1.1e-23
CALU	brown	-0.58	4.7e-22	0.58	4.7e-22	-0.046	0.49	-0.16	0.014	-0.78	2.3e-48	0.26	5.4e-05	0.82	1.3e-56	0.81	2.8e-55	-0.084	0.21	0.51	1e-16	0.34	1.9e-07	0.36	1.7e-08
CAMSAP2	brown	-0.48	1.8e-14	0.48	1.8e-14	-0.026	0.69	-0.14	0.029	-0.42	3.3e-11	0.21	0.0013	0.71	1.6e-36	0.46	2.2e-13	-0.46	1.3e-13	0.089	0.18	0.15	0.021	0.67	3.4e-31
CAV1	brown	-0.44	2.7e-12	0.44	2.7e-12	0.094	0.16	-0.17	0.0096	-0.55	2.2e-19	0.13	0.045	0.81	2.1e-53	0.6	1.9e-23	-0.28	1.3e-05	0.31	1.8e-06	0.31	1.6e-06	0.61	5.9e-25
CAV2	brown	-0.34	9.4e-08	0.34	9.4e-08	-0.035	0.6	-0.16	0.013	-0.39	9.6e-10	0.24	0.00033	0.72	6.5e-38	0.37	1.3e-08	-0.46	2.3e-13	0.1	0.12	0.22	0.00083	0.67	5.7e-31
CBX7	brown	0.4	2.2e-10	-0.4	2.2e-10	0.26	6.2e-05	0.36	3.4e-08	0.41	1.2e-10	-0.46	2e-13	-0.79	3.9e-49	-0.28	1.6e-05	0.46	2.2e-13	-0.16	0.013	-0.31	2.6e-06	-0.82	7.8e-57
CCDC86	brown	-0.44	1.9e-12	0.44	1.9e-12	-0.19	0.0046	-0.28	1.5e-05	-0.49	2.3e-15	0.4	2.9e-10	0.76	1.8e-43	0.31	2e-06	-0.32	1.1e-06	0.2	0.0029	0.32	9.6e-07	0.7	1e-34
CCNG1	brown	0.54	2.3e-18	-0.54	2.3e-18	0.2	0.0027	0.45	6.6e-13	0.45	6e-13	-0.37	5.7e-09	-0.65	1.1e-28	-0.32	6.3e-07	0.19	0.0035	-0.27	4.1e-05	-0.35	4.3e-08	-0.65	1.6e-28
CD109	brown	-0.47	9.1e-14	0.47	9.1e-14	-0.15	0.02	-0.32	5.3e-07	-0.42	3.9e-11	0.37	5.7e-09	0.69	3.5e-33	0.43	8.5e-12	-0.45	1.5e-12	0.11	0.11	0.16	0.018	0.63	1.1e-26
CD151	brown	-0.34	1e-07	0.34	1e-07	0.11	0.11	0.062	0.35	-0.44	2.4e-12	0.035	0.6	0.63	7.8e-27	0.53	6.1e-18	-0.36	1.8e-08	0.15	0.026	0.15	0.02	0.4	3.4e-10
CD44	brown	-0.48	2.1e-14	0.48	2.1e-14	-0.3	5.4e-06	-0.36	1.6e-08	-0.59	1.7e-22	0.36	3.2e-08	0.71	1.3e-36	0.38	3.6e-09	-0.00035	1	0.45	1.1e-12	0.44	3e-12	0.56	1.9e-20
CDH3	brown	-0.74	3.9e-40	0.74	3.9e-40	-0.41	1.5e-10	-0.49	3.5e-15	-0.72	3.2e-38	0.62	1.2e-25	0.84	4.5e-63	0.39	1.1e-09	-0.026	0.69	0.49	2e-15	0.64	8.3e-28	0.71	5.4e-36
CDK6	brown	-0.35	7.1e-08	0.35	7.1e-08	-0.19	0.0045	-0.19	0.0032	-0.53	7.5e-18	0.38	3.1e-09	0.78	9.9e-48	0.38	2.8e-09	-0.23	0.00037	0.26	9.5e-05	0.27	3.9e-05	0.61	2e-24
CEBPB	brown	-0.75	1.1e-41	0.75	1.1e-41	-0.19	0.0034	-0.38	2.5e-09	-0.8	7.1e-53	0.38	3.1e-09	0.83	2.7e-58	0.64	2.6e-27	0.055	0.41	0.66	8e-30	0.58	3.7e-22	0.54	9.3e-19
CEMIP2	brown	-0.54	1.3e-18	0.54	1.3e-18	-0.2	0.0028	-0.33	2.8e-07	-0.77	2.7e-45	0.35	7.6e-08	0.78	4e-48	0.66	1.8e-29	0.16	0.015	0.63	9.8e-27	0.48	1.2e-14	0.36	3.5e-08
CIDEB	brown	0.38	2.1e-09	-0.38	2.1e-09	0.031	0.64	0.17	0.011	0.65	1.3e-28	-0.24	0.00024	-0.67	8.1e-31	-0.58	6.4e-22	-0.073	0.28	-0.49	2.4e-15	-0.37	6.5e-09	-0.3	2.7e-06
CIRBP	brown	0.44	2.4e-12	-0.44	2.4e-12	0.3	5.6e-06	0.41	9.6e-11	0.42	4e-11	-0.58	1e-21	-0.72	4.8e-38	-0.22	0.00066	0.36	2e-08	-0.24	0.00027	-0.35	4.4e-08	-0.73	1.7e-39
CLIC4	brown	-0.67	2.7e-31	0.67	2.7e-31	-0.15	0.024	-0.27	3.7e-05	-0.82	1e-55	0.43	1.2e-11	0.82	6.1e-56	0.68	1.5e-32	-0.034	0.61	0.53	4.4e-18	0.42	3.6e-11	0.44	2.8e-12
CLINT1	brown	0.57	2.2e-21	-0.57	2.2e-21	0.037	0.58	0.35	8.9e-08	0.67	1.2e-31	-0.35	7e-08	-0.71	9.7e-36	-0.55	8.7e-20	0.064	0.33	-0.43	6.3e-12	-0.42	6e-11	-0.44	3.4e-12
CLU	brown	0.5	1.7e-15	-0.5	1.7e-15	0.27	3.2e-05	0.46	3e-13	0.48	1.1e-14	-0.5	1.4e-15	-0.72	1.5e-37	-0.31	1.5e-06	0.36	2.7e-08	-0.21	0.0016	-0.36	1.6e-08	-0.71	3.5e-36
COL17A1	brown	-0.42	3.2e-11	0.42	3.2e-11	-0.19	0.0038	-0.28	1.3e-05	-0.38	2.8e-09	0.34	1.7e-07	0.69	8.4e-34	0.26	9.7e-05	-0.36	2.6e-08	0.091	0.17	0.33	2.9e-07	0.72	3.7e-37
COL27A1	brown	-0.65	2.7e-28	0.65	2.7e-28	-0.22	0.00092	-0.44	2.7e-12	-0.72	1.9e-37	0.46	1.9e-13	0.78	3.9e-47	0.58	3.4e-22	-0.079	0.23	0.47	6.5e-14	0.53	1.1e-17	0.52	2.8e-17
COL4A5	brown	-0.63	9.8e-27	0.63	9.8e-27	-0.19	0.0033	-0.24	0.00031	-0.61	6.7e-25	0.43	1.2e-11	0.77	1.9e-46	0.46	2.4e-13	-0.26	6.8e-05	0.27	3.2e-05	0.37	5.6e-09	0.6	2.2e-23
COL4A6	brown	-0.51	2.8e-16	0.51	2.8e-16	-0.16	0.016	-0.28	1.3e-05	-0.56	2.7e-20	0.33	3.7e-07	0.81	5.5e-55	0.44	2e-12	-0.23	0.00043	0.28	2e-05	0.35	8.3e-08	0.68	3.5e-32
COLGALT1	brown	-0.69	1.5e-33	0.69	1.5e-33	-0.31	1.4e-06	-0.41	1.6e-10	-0.84	2.4e-61	0.59	7.5e-23	0.82	1.7e-55	0.57	2.1e-21	0.0068	0.92	0.56	2.4e-20	0.5	1.3e-15	0.44	1.8e-12
CSK	brown	0.48	1.5e-14	-0.48	1.5e-14	-0.039	0.56	0.093	0.16	0.59	1e-22	-0.32	6.2e-07	-0.69	1e-33	-0.51	1.7e-16	0.38	3.9e-09	-0.19	0.0034	-0.23	0.00037	-0.46	1.7e-13
CSPG4	brown	-0.43	1.9e-11	0.43	1.9e-11	0.015	0.82	-0.27	4.3e-05	-0.55	2.1e-19	0.19	0.0047	0.76	1.7e-44	0.57	4.2e-21	-0.23	0.00055	0.29	1e-05	0.27	4.1e-05	0.54	1.1e-18
CTPS1	brown	-0.5	1e-15	0.5	1e-15	-0.33	2.2e-07	-0.43	9.3e-12	-0.49	2.2e-15	0.6	2.9e-23	0.7	9.9e-35	0.23	0.00055	-0.17	0.0085	0.29	7.1e-06	0.39	9.5e-10	0.67	1.3e-31
CTSL	brown	-0.54	1.3e-18	0.54	1.3e-18	-0.15	0.026	-0.2	0.0021	-0.73	1.4e-39	0.26	6.4e-05	0.73	8.4e-39	0.63	1.3e-26	0.15	0.022	0.74	4e-41	0.58	6.4e-22	0.37	1.1e-08
CTSLP8	brown	-0.41	9e-11	0.41	9e-11	-0.18	0.0053	-0.23	0.0006	-0.58	6.9e-22	0.28	1.5e-05	0.68	1.1e-32	0.44	5e-12	0.0025	0.97	0.56	1.5e-20	0.47	3.3e-14	0.45	8e-13
CXCL2	brown	-0.47	7.3e-14	0.47	7.3e-14	-0.26	7.7e-05	-0.2	0.0022	-0.63	1.5e-26	0.42	4.2e-11	0.63	1.1e-26	0.37	9.8e-09	0.094	0.16	0.59	6.7e-23	0.44	4.2e-12	0.29	7.5e-06
CXCL3	brown	-0.44	1.8e-12	0.44	1.8e-12	-0.23	0.00061	-0.27	3.4e-05	-0.63	1.6e-26	0.44	4.5e-12	0.66	2.7e-30	0.4	2.6e-10	0.022	0.74	0.57	2.8e-21	0.38	2.5e-09	0.32	6.9e-07
CXCL5	brown	-0.44	3.5e-12	0.44	3.5e-12	-0.17	0.013	-0.18	0.0062	-0.61	6.6e-25	0.33	4.2e-07	0.66	4.9e-30	0.51	1.5e-16	-0.046	0.49	0.53	1.2e-17	0.27	4.4e-05	0.32	6.4e-07
CXCL8	brown	-0.6	2.5e-23	0.6	2.5e-23	-0.39	1.5e-09	-0.36	1.5e-08	-0.73	8.5e-39	0.62	1.4e-25	0.78	7.1e-48	0.36	2.7e-08	0.058	0.38	0.61	1.2e-24	0.51	2.1e-16	0.51	2e-16
CYP26B1	brown	-0.47	8.7e-14	0.47	8.7e-14	-0.18	0.0066	-0.3	5.2e-06	-0.39	8e-10	0.13	0.046	0.69	1.3e-33	0.36	1.5e-08	-0.21	0.0013	0.26	8.5e-05	0.36	1.8e-08	0.75	5.1e-42
CYP27B1	brown	-0.5	1.1e-15	0.5	1.1e-15	-0.23	0.00042	-0.33	3.9e-07	-0.64	9.5e-28	0.44	2.4e-12	0.84	2.6e-63	0.42	3.8e-11	-0.11	0.11	0.47	6.2e-14	0.47	1.2e-13	0.64	9e-28
CYP27C1	brown	-0.46	1.7e-13	0.46	1.7e-13	-0.088	0.18	-0.33	4e-07	-0.43	1.7e-11	0.22	0.00079	0.68	8.1e-33	0.4	2.2e-10	-0.23	0.00044	0.19	0.0034	0.34	1.9e-07	0.65	7.3e-29
CYP4B1	brown	0.61	5e-25	-0.61	5e-25	0.18	0.0058	0.32	6.5e-07	0.76	1.1e-43	-0.41	1.4e-10	-0.74	2.2e-41	-0.57	1e-20	-0.07	0.29	-0.56	5.6e-20	-0.48	1.3e-14	-0.44	4.1e-12
CYP4F12	brown	0.53	4.3e-18	-0.53	4.3e-18	0.11	0.098	0.26	7.9e-05	0.76	5.8e-45	-0.36	1.5e-08	-0.76	8.3e-44	-0.66	1.6e-29	-0.14	0.032	-0.65	8.9e-29	-0.49	2.3e-15	-0.35	4.4e-08
CYP4X1	brown	0.33	2.6e-07	-0.33	2.6e-07	0.047	0.48	0.39	1.1e-09	0.42	3.6e-11	-0.16	0.015	-0.68	6.9e-33	-0.44	2.2e-12	0.21	0.0012	-0.25	0.00014	-0.26	7.8e-05	-0.64	1.3e-27
CYSLTR1	brown	0.55	1.2e-19	-0.55	1.2e-19	0.2	0.002	0.2	0.0026	0.5	1e-15	-0.47	9.5e-14	-0.69	1.1e-33	-0.34	2.2e-07	0.49	7e-15	-0.087	0.19	-0.19	0.0033	-0.62	6.1e-26
DCBLD1	brown	-0.59	2.3e-22	0.59	2.3e-22	-0.2	0.0022	-0.36	3.1e-08	-0.7	1.4e-34	0.38	2e-09	0.89	1.1e-80	0.62	9.7e-26	-0.13	0.057	0.49	2.7e-15	0.52	3.4e-17	0.65	4.8e-29
DCBLD2	brown	-0.38	3.7e-09	0.38	3.7e-09	-0.027	0.69	-0.17	0.0082	-0.63	2.5e-26	0.44	1.8e-12	0.69	4.8e-33	0.49	3.8e-15	-0.17	0.0099	0.27	3.7e-05	0.23	0.00042	0.28	1.3e-05
DMXL1	brown	0.5	3.8e-16	-0.5	3.8e-16	0.034	0.61	0.19	0.0042	0.54	6e-19	-0.29	7.5e-06	-0.77	2.4e-45	-0.49	7.2e-15	0.37	7.3e-09	-0.26	6.7e-05	-0.24	0.00024	-0.6	1.1e-23
DNMT3B	brown	-0.5	8.6e-16	0.5	8.6e-16	-0.24	0.00022	-0.27	4.5e-05	-0.44	2e-12	0.33	4e-07	0.67	1e-30	0.3	3.3e-06	-0.25	0.00011	0.21	0.0014	0.31	2.2e-06	0.65	1.8e-28
DRAP1	brown	-0.43	6.4e-12	0.43	6.4e-12	-0.26	6.7e-05	-0.35	7.9e-08	-0.41	6.7e-11	0.32	6.9e-07	0.67	2e-31	0.26	7.9e-05	-0.2	0.0028	0.23	0.00038	0.36	1.9e-08	0.67	1.4e-31
DUSP6	brown	-0.5	6.7e-16	0.5	6.7e-16	-0.065	0.33	-0.097	0.15	-0.63	4e-27	0.18	0.0051	0.71	1.4e-35	0.5	5.8e-16	0.028	0.67	0.48	2.7e-14	0.39	8.8e-10	0.38	2e-09
ECHDC2	brown	0.62	1.6e-25	-0.62	1.6e-25	0.27	4.1e-05	0.39	1.1e-09	0.73	5.2e-39	-0.53	5.7e-18	-0.86	7.3e-68	-0.48	1.9e-14	0.017	0.8	-0.51	1.4e-16	-0.55	2.8e-19	-0.65	3.6e-29
EIF4E3	brown	0.63	4.3e-27	-0.63	4.3e-27	0.29	6e-06	0.32	9.9e-07	0.63	2.6e-26	-0.44	2.9e-12	-0.7	4.2e-35	-0.44	3.5e-12	0.13	0.044	-0.28	2.1e-05	-0.28	1.3e-05	-0.52	3.9e-17
EIF5A2	brown	-0.48	1.9e-14	0.48	1.9e-14	-0.18	0.0075	-0.26	5.1e-05	-0.69	4e-34	0.45	6.9e-13	0.73	5.5e-40	0.51	2.3e-16	-0.046	0.49	0.45	7.7e-13	0.42	5e-11	0.36	1.4e-08
EMP2	brown	0.49	1.9e-15	-0.49	1.9e-15	0.021	0.75	0.23	0.00058	0.71	7.4e-37	-0.17	0.011	-0.77	2e-46	-0.6	2.1e-23	-0.044	0.51	-0.51	3.3e-16	-0.41	6.9e-11	-0.42	5.2e-11
ENAH	brown	-0.66	8.3e-30	0.66	8.3e-30	-0.088	0.19	-0.23	0.00048	-0.63	1.9e-26	0.25	0.00015	0.78	1.6e-48	0.56	5.9e-20	-0.27	2.8e-05	0.29	7.2e-06	0.34	1.9e-07	0.66	3.8e-30
ENTPD7	brown	-0.47	6.3e-14	0.47	6.3e-14	-0.36	1.6e-08	-0.28	1.6e-05	-0.49	7.3e-15	0.39	1.2e-09	0.68	9.3e-32	0.3	5.8e-06	-0.1	0.13	0.38	2.9e-09	0.41	7.5e-11	0.59	1.1e-22
EPHX2	brown	0.67	6.6e-31	-0.67	6.6e-31	0.15	0.023	0.34	1.5e-07	0.79	4.5e-50	-0.35	3.9e-08	-0.84	3.6e-61	-0.66	1.8e-29	-0.06	0.37	-0.6	1.6e-23	-0.55	1.8e-19	-0.52	2.9e-17
ERRFI1	brown	-0.54	1e-18	0.54	1e-18	-0.21	0.0012	-0.26	8.4e-05	-0.57	2e-21	0.39	1.4e-09	0.71	1.1e-36	0.48	1.2e-14	-0.15	0.023	0.41	1.3e-10	0.31	1.9e-06	0.5	1.3e-15
ESM1	brown	-0.41	6.7e-11	0.41	6.7e-11	-0.25	0.00012	-0.29	1.2e-05	-0.57	3.8e-21	0.54	1.8e-18	0.68	9.2e-33	0.35	5.7e-08	-0.2	0.0021	0.27	3e-05	0.22	0.00069	0.42	2.7e-11
EVA1A	brown	-0.42	3.6e-11	0.42	3.6e-11	-0.057	0.39	-0.22	0.0009	-0.67	1.5e-31	0.33	2.3e-07	0.82	6.9e-56	0.69	3.7e-33	-0.16	0.019	0.44	6e-12	0.27	2.8e-05	0.41	1.7e-10
EXT1	brown	-0.45	1.5e-12	0.45	1.5e-12	-0.14	0.035	-0.25	0.00013	-0.54	8.4e-19	0.39	8.3e-10	0.64	3e-27	0.38	2e-09	-0.24	0.0002	0.25	0.00013	0.3	5.8e-06	0.43	7.2e-12
F2RL1	brown	-0.39	1.5e-09	0.39	1.5e-09	-0.2	0.003	-0.24	0.00027	-0.31	1.4e-06	0.21	0.0012	0.72	4.9e-38	0.32	1.2e-06	-0.4	2.8e-10	0.1	0.13	0.25	0.00017	0.82	7.5e-58
FAAH2	brown	0.49	2.2e-15	-0.49	2.2e-15	-0.0083	0.9	0.26	5.9e-05	0.66	6.2e-30	-0.25	0.00013	-0.74	6.1e-41	-0.66	2.3e-30	0.056	0.4	-0.45	4.9e-13	-0.32	7.6e-07	-0.43	1.9e-11
FADS3	brown	-0.31	2.3e-06	0.31	2.3e-06	-0.032	0.63	-0.23	0.00058	-0.61	3.3e-24	0.22	0.00073	0.64	5.2e-28	0.48	9.2e-15	0.04	0.55	0.45	1.6e-12	0.29	7.3e-06	0.28	1.5e-05
FAM126A	brown	-0.28	1.4e-05	0.28	1.4e-05	-0.19	0.0042	-0.25	0.00018	-0.36	2.9e-08	0.27	2.7e-05	0.66	3.6e-30	0.25	0.00015	-0.3	5.5e-06	0.18	0.0062	0.18	0.006	0.66	2.4e-29
FAM221A	brown	0.67	1.1e-30	-0.67	1.1e-30	0.17	0.0083	0.5	6.7e-16	0.69	1.4e-33	-0.38	4.1e-09	-0.8	1e-51	-0.48	1.4e-14	-0.032	0.63	-0.5	1.3e-15	-0.55	1.2e-19	-0.67	1.4e-31
FAT1	brown	-0.62	5.4e-26	0.62	5.4e-26	-0.26	5.9e-05	-0.24	0.0002	-0.64	3.5e-27	0.53	3.1e-18	0.76	4.2e-44	0.47	7.5e-14	-0.25	0.00012	0.31	2.4e-06	0.36	2.6e-08	0.55	1.7e-19
FBLIM1	brown	-0.59	2.3e-22	0.59	2.3e-22	-0.23	0.00043	-0.3	5.7e-06	-0.59	1.7e-22	0.28	1.8e-05	0.85	9.7e-64	0.47	6.9e-14	-0.26	8.8e-05	0.32	1.2e-06	0.4	2.3e-10	0.79	5.1e-49
FDFT1	brown	0.29	1.1e-05	-0.29	1.1e-05	-0.12	0.064	0.18	0.0052	0.44	5.4e-12	-0.0092	0.89	-0.62	3.5e-25	-0.49	2.4e-15	0.032	0.63	-0.39	8.3e-10	-0.33	2.8e-07	-0.38	2.3e-09
FERMT1	brown	-0.46	2.5e-13	0.46	2.5e-13	-0.28	1.6e-05	-0.34	1.1e-07	-0.42	6.2e-11	0.53	8.6e-18	0.66	1.8e-29	0.19	0.004	-0.32	7.4e-07	0.16	0.016	0.24	0.00025	0.64	1.9e-27
FEZ1	brown	-0.47	1.2e-13	0.47	1.2e-13	-0.048	0.47	-0.22	0.00085	-0.56	7.5e-20	0.21	0.0012	0.74	2.5e-41	0.51	1.7e-16	-0.22	0.00074	0.23	0.00051	0.26	5.8e-05	0.54	1.5e-18
FHL2	brown	-0.33	2.4e-07	0.33	2.4e-07	0.055	0.41	-0.11	0.084	-0.46	1.4e-13	0.17	0.0088	0.71	1.5e-36	0.49	4.9e-15	-0.37	5.4e-09	0.2	0.0022	0.17	0.01	0.52	3.2e-17
FHOD1	brown	-0.44	2.2e-12	0.44	2.2e-12	0.18	0.0076	-0.28	1.3e-05	-0.55	2.5e-19	0.038	0.56	0.67	1.4e-30	0.49	2.6e-15	-0.041	0.54	0.37	7.4e-09	0.39	1.3e-09	0.52	5.9e-17
FJX1	brown	-0.49	5.4e-15	0.49	5.4e-15	-0.19	0.0047	-0.38	2.4e-09	-0.61	1.1e-24	0.39	1.6e-09	0.79	3.2e-50	0.45	8e-13	-0.15	0.024	0.4	2.1e-10	0.44	2.7e-12	0.6	6.2e-24
FLNA	brown	-0.61	6.8e-25	0.61	6.8e-25	-0.13	0.048	-0.28	1.8e-05	-0.75	3.6e-42	0.29	1e-05	0.71	6.3e-36	0.68	2.9e-32	0.076	0.25	0.53	3.8e-18	0.41	1.3e-10	0.3	3.9e-06
FLRT2	brown	-0.27	4.9e-05	0.27	4.9e-05	0.096	0.15	-0.16	0.015	-0.41	1.3e-10	0.088	0.18	0.65	4.9e-29	0.49	5.3e-15	-0.23	0.00045	0.14	0.03	0.16	0.016	0.47	1.1e-13
FLRT3	brown	-0.36	2.3e-08	0.36	2.3e-08	-0.072	0.28	-0.21	0.0013	-0.29	1.1e-05	0.058	0.38	0.64	2e-27	0.31	1.4e-06	-0.32	9.1e-07	0.065	0.33	0.23	0.0005	0.72	3.2e-37
FMNL2	brown	-0.62	2.3e-25	0.62	2.3e-25	-0.2	0.0022	-0.28	2e-05	-0.73	1.9e-39	0.46	3.2e-13	0.77	1.6e-45	0.47	7.4e-14	-0.064	0.34	0.49	5.8e-15	0.52	2.4e-17	0.51	1.6e-16
FOSL1	brown	-0.44	3.5e-12	0.44	3.5e-12	-0.25	0.00011	-0.22	0.0011	-0.42	2.4e-11	0.34	1.6e-07	0.76	8.1e-45	0.28	2.2e-05	-0.31	2e-06	0.24	0.00034	0.32	9.4e-07	0.74	1.4e-40
FOXD1	brown	-0.5	4.5e-16	0.5	4.5e-16	-0.097	0.14	-0.32	7.2e-07	-0.62	1.3e-25	0.39	9.7e-10	0.73	5.7e-39	0.49	2.1e-15	-0.13	0.058	0.34	2.1e-07	0.32	9.6e-07	0.47	8.6e-14
FRAT2	brown	0.33	3e-07	-0.33	3e-07	0.015	0.82	0.28	1.8e-05	0.52	2.5e-17	-0.18	0.0075	-0.66	1.9e-30	-0.45	6.1e-13	0.06	0.37	-0.31	1.9e-06	-0.34	9.8e-08	-0.46	1.3e-13
FSCN1	brown	-0.68	2.1e-32	0.68	2.1e-32	-0.36	2.9e-08	-0.49	3.5e-15	-0.7	3.6e-35	0.59	1.6e-22	0.89	5e-78	0.45	1.3e-12	-0.14	0.034	0.42	2.1e-11	0.5	6.4e-16	0.73	7.6e-40
FST	brown	-0.39	7.9e-10	0.39	7.9e-10	-0.11	0.11	-0.21	0.0017	-0.51	2.4e-16	0.32	1.2e-06	0.67	6.2e-31	0.45	9.8e-13	-0.076	0.25	0.39	9.7e-10	0.36	3.3e-08	0.42	2.4e-11
FSTL3	brown	-0.42	6.1e-11	0.42	6.1e-11	-0.041	0.54	-0.2	0.0024	-0.6	9.5e-24	0.2	0.0026	0.8	3e-51	0.58	4.9e-22	-0.24	0.00025	0.33	3.5e-07	0.28	1.4e-05	0.54	2.5e-18
GALNT2	brown	-0.6	6.5e-24	0.6	6.5e-24	-0.19	0.0046	-0.27	3.4e-05	-0.77	8e-47	0.4	2.8e-10	0.8	5.6e-52	0.66	1.5e-29	-0.026	0.69	0.53	6.5e-18	0.44	3.1e-12	0.4	5.4e-10
GALNT6	brown	-0.37	5.8e-09	0.37	5.8e-09	-0.029	0.66	0.16	0.016	-0.42	3.8e-11	-0.021	0.76	0.64	7.7e-28	0.38	2e-09	-0.19	0.0045	0.22	0.0011	0.29	6.7e-06	0.55	1.4e-19
GJA1	brown	-0.62	3.8e-25	0.62	3.8e-25	-0.17	0.0085	-0.38	2.9e-09	-0.54	1.5e-18	0.26	7.7e-05	0.76	2.2e-43	0.56	1.6e-20	-0.22	0.00066	0.28	1.9e-05	0.35	5.7e-08	0.7	2.4e-34
GJC1	brown	-0.54	5.4e-19	0.54	5.4e-19	-0.098	0.14	-0.38	3e-09	-0.69	2.5e-33	0.34	1.5e-07	0.76	1.5e-43	0.68	6.5e-32	-0.069	0.3	0.44	3.4e-12	0.34	1.1e-07	0.4	3e-10
GMFB	brown	-0.42	4.2e-11	0.42	4.2e-11	-0.36	2.1e-08	-0.33	3.9e-07	-0.54	6.4e-19	0.54	2.1e-18	0.74	2.4e-40	0.31	1.5e-06	-0.12	0.066	0.36	2.4e-08	0.38	4.4e-09	0.59	1.2e-22
GNA12	brown	-0.62	2.2e-25	0.62	2.2e-25	-0.16	0.018	-0.29	6e-06	-0.83	1e-59	0.38	1.9e-09	0.83	2.9e-60	0.66	1.9e-29	0.059	0.37	0.59	9.4e-23	0.45	1.1e-12	0.41	6.8e-11
GOLGA8N	brown	0.53	1.3e-17	-0.53	1.3e-17	0.33	2.6e-07	0.36	3.1e-08	0.47	5.1e-14	-0.56	4.6e-20	-0.69	6.2e-34	-0.19	0.0033	0.27	3.7e-05	-0.21	0.0014	-0.37	5.2e-09	-0.69	3e-33
GOLPH3L	brown	0.53	1.5e-17	-0.53	1.5e-17	0.11	0.089	0.45	1.5e-12	0.55	1.4e-19	-0.26	7.6e-05	-0.69	2.4e-33	-0.44	5.4e-12	0.05	0.45	-0.44	2.9e-12	-0.43	6.6e-12	-0.62	6.1e-26
GPR39	brown	-0.45	1.4e-12	0.45	1.4e-12	-0.23	0.00035	-0.34	1e-07	-0.52	2e-17	0.55	1e-19	0.64	3.4e-28	0.18	0.0051	-0.085	0.2	0.28	1.7e-05	0.49	4.8e-15	0.52	4.8e-17
GPR68	brown	-0.54	8.8e-19	0.54	8.8e-19	-0.28	2.1e-05	-0.38	2.5e-09	-0.57	5.4e-21	0.35	7.1e-08	0.77	1e-45	0.39	1.7e-09	-0.089	0.18	0.38	2.1e-09	0.47	4e-14	0.67	4.4e-31
GPRASP1	brown	0.51	2.4e-16	-0.51	2.4e-16	0.32	6.1e-07	0.52	5.9e-17	0.45	8e-13	-0.57	1.2e-20	-0.66	1.6e-29	-0.17	0.01	0.22	0.00064	-0.32	1e-06	-0.43	1.1e-11	-0.68	4.1e-32
GRAMD1C	brown	0.42	2.1e-11	-0.42	2.1e-11	0.021	0.75	0.19	0.0037	0.71	9.4e-37	-0.23	0.00048	-0.73	2.1e-39	-0.63	1.8e-26	0.012	0.85	-0.5	7.8e-16	-0.34	1.5e-07	-0.3	4.7e-06
GSDME	brown	-0.56	2.9e-20	0.56	2.9e-20	-0.15	0.024	-0.33	2.9e-07	-0.67	1.6e-31	0.42	3.1e-11	0.87	7e-70	0.52	4.4e-17	-0.22	0.00067	0.39	6.8e-10	0.42	6e-11	0.65	9.2e-29
HAS2	brown	-0.36	2.3e-08	0.36	2.3e-08	-0.045	0.5	-0.22	0.001	-0.55	9.5e-20	0.26	9.3e-05	0.66	2e-30	0.58	2.7e-22	-0.079	0.23	0.42	3.9e-11	0.27	5e-05	0.31	2.7e-06
HAS3	brown	-0.57	3.1e-21	0.57	3.1e-21	-0.39	1e-09	-0.31	1.3e-06	-0.41	8.5e-11	0.5	1.5e-15	0.63	2.8e-26	0.15	0.022	-0.22	0.00065	0.22	0.0011	0.36	1.4e-08	0.67	1.6e-31
HDHD2	brown	0.51	1.2e-16	-0.51	1.2e-16	0.15	0.019	0.33	2.5e-07	0.57	3.2e-21	-0.32	8.3e-07	-0.76	1.5e-44	-0.46	1.9e-13	0.15	0.025	-0.4	5e-10	-0.37	6.4e-09	-0.61	1.5e-24
HIF1A	brown	-0.43	1.3e-11	0.43	1.3e-11	-0.34	1.9e-07	-0.32	8.6e-07	-0.57	1.2e-20	0.38	2.4e-09	0.71	6.4e-36	0.47	4.3e-14	-0.033	0.62	0.47	5.2e-14	0.31	2.2e-06	0.49	6.6e-15
HOMER3	brown	-0.64	1.1e-27	0.64	1.1e-27	-0.16	0.019	-0.36	2.6e-08	-0.71	6.2e-37	0.4	2.6e-10	0.92	1.7e-91	0.56	3.5e-20	-0.22	0.00081	0.39	7.8e-10	0.47	1.2e-13	0.71	1.7e-36
HOXC13	brown	-0.52	4.2e-17	0.52	4.2e-17	-0.17	0.01	-0.32	6.3e-07	-0.51	1.4e-16	0.31	2e-06	0.69	1.6e-33	0.34	1.2e-07	-0.19	0.0037	0.25	0.00017	0.35	4.3e-08	0.67	1.3e-30
HRH1	brown	-0.37	1.4e-08	0.37	1.4e-08	-0.067	0.31	-0.33	2.5e-07	-0.47	1.2e-13	0.27	3.5e-05	0.67	6.7e-31	0.41	9.9e-11	-0.23	0.00048	0.3	3.2e-06	0.24	0.00019	0.51	1.9e-16
HSF2BP	brown	-0.4	3.4e-10	0.4	3.4e-10	-0.17	0.0083	-0.27	4.2e-05	-0.53	6.6e-18	0.43	1.4e-11	0.69	5e-34	0.36	2.9e-08	-0.26	9.8e-05	0.18	0.0055	0.25	0.00018	0.49	5.4e-15
HSPH1	brown	-0.51	1.6e-16	0.51	1.6e-16	-0.24	0.00026	-0.33	2.6e-07	-0.5	5.9e-16	0.45	1.4e-12	0.69	2.8e-33	0.23	0.00058	-0.16	0.013	0.29	1.1e-05	0.42	4.4e-11	0.7	2.9e-34
IDNK	brown	0.55	1.9e-19	-0.55	1.9e-19	0.08	0.23	0.26	9.8e-05	0.64	5.7e-28	-0.38	2.3e-09	-0.81	1.9e-54	-0.57	8.6e-21	0.32	9.2e-07	-0.34	1.5e-07	-0.32	1e-06	-0.56	2.5e-20
IGF2BP2	brown	-0.53	5.6e-18	0.53	5.6e-18	-0.21	0.0015	-0.33	3.2e-07	-0.55	1e-19	0.42	5.4e-11	0.72	1.4e-37	0.39	1.6e-09	-0.22	0.00064	0.29	1.2e-05	0.36	1.4e-08	0.58	1.2e-21
IGSF10	brown	0.59	4.6e-23	-0.59	4.6e-23	0.4	5.9e-10	0.41	2e-10	0.63	1.1e-26	-0.57	1.2e-20	-0.75	3.2e-43	-0.36	2.3e-08	0.025	0.71	-0.48	8.4e-15	-0.55	1.5e-19	-0.63	4.4e-27
IL11	brown	-0.39	1.7e-09	0.39	1.7e-09	-0.12	0.06	-0.23	0.00041	-0.54	1.1e-18	0.25	0.00011	0.69	5.4e-33	0.49	2.8e-15	-0.13	0.05	0.4	4.2e-10	0.2	0.0029	0.4	2.2e-10
IL1RAP	brown	-0.27	2.9e-05	0.27	2.9e-05	-0.32	1e-06	-0.23	0.00035	-0.39	9.2e-10	0.51	1.6e-16	0.65	2.7e-29	0.22	0.00077	-0.32	9.5e-07	0.21	0.0017	0.23	0.00051	0.54	8.9e-19
IL24	brown	-0.48	9.8e-15	0.48	9.8e-15	-0.21	0.0012	-0.31	2.6e-06	-0.59	8.4e-23	0.34	9.8e-08	0.8	4.1e-53	0.42	4.3e-11	-0.13	0.047	0.43	1.2e-11	0.37	1.1e-08	0.62	6.8e-26
IL6	brown	-0.44	2e-12	0.44	2e-12	-0.23	0.00035	-0.26	7.6e-05	-0.58	1.3e-21	0.36	1.8e-08	0.65	1.9e-28	0.36	1.5e-08	0.037	0.58	0.55	1.3e-19	0.41	9.5e-11	0.38	2.2e-09
INHBA	brown	-0.64	1.4e-27	0.64	1.4e-27	-0.13	0.042	-0.27	3e-05	-0.8	4.1e-52	0.36	2.7e-08	0.92	3.2e-96	0.76	6.1e-44	-0.097	0.14	0.59	1.6e-22	0.48	1.1e-14	0.54	6.3e-19
INPP1	brown	0.33	3.6e-07	-0.33	3.6e-07	-0.086	0.2	0.12	0.061	0.49	6.9e-15	-0.068	0.3	-0.61	2e-24	-0.55	4.6e-19	0.11	0.091	-0.24	0.00026	-0.12	0.081	-0.38	2.8e-09
IRS1	brown	-0.59	7.4e-23	0.59	7.4e-23	-0.081	0.22	-0.32	6.6e-07	-0.67	1.7e-30	0.24	0.00023	0.82	2.5e-57	0.65	7e-29	-0.099	0.14	0.42	6.5e-11	0.42	3.3e-11	0.6	2.2e-23
ISOC1	brown	0.52	5.6e-17	-0.52	5.6e-17	0.046	0.49	0.24	0.00031	0.63	3.8e-26	-0.18	0.0068	-0.75	1.3e-41	-0.58	9.1e-22	0.075	0.26	-0.44	4.5e-12	-0.41	1.3e-10	-0.51	1.8e-16
ITGA3	brown	-0.58	9.1e-22	0.58	9.1e-22	-0.22	0.00065	-0.37	8.5e-09	-0.66	8.9e-30	0.48	8.5e-15	0.86	6.2e-68	0.41	7.8e-11	-0.17	0.0087	0.41	8.1e-11	0.53	9.7e-18	0.69	5.5e-33
ITGA5	brown	-0.52	2e-17	0.52	2e-17	-0.006	0.93	-0.29	1e-05	-0.73	8.4e-40	0.23	0.00054	0.83	1.6e-58	0.78	3.7e-47	-0.094	0.16	0.53	7.2e-18	0.35	8.5e-08	0.4	2.1e-10
ITGA6	brown	-0.6	5.9e-24	0.6	5.9e-24	-0.26	8.5e-05	-0.27	3.3e-05	-0.64	6.9e-28	0.53	8.5e-18	0.81	7e-55	0.35	4.2e-08	-0.25	0.00018	0.27	4.2e-05	0.41	9.7e-11	0.67	1.2e-31
ITGB4	brown	-0.56	1.8e-20	0.56	1.8e-20	-0.22	0.00064	-0.27	3.6e-05	-0.61	2e-24	0.54	8.2e-19	0.76	1.8e-44	0.32	8.7e-07	-0.28	1.7e-05	0.22	0.00069	0.36	1.4e-08	0.58	5.2e-22
ITGB6	brown	-0.46	3e-13	0.46	3e-13	-0.12	0.067	-0.27	2.6e-05	-0.59	5.9e-23	0.5	1e-15	0.72	5.9e-38	0.42	3e-11	-0.14	0.041	0.38	3.5e-09	0.44	4.3e-12	0.46	2.3e-13
ITPRID2	brown	-0.51	3.6e-16	0.51	3.6e-16	-0.15	0.02	-0.094	0.16	-0.38	2.5e-09	0.2	0.0025	0.64	9.8e-28	0.29	9e-06	-0.34	1.7e-07	0.085	0.2	0.23	0.00054	0.7	3.1e-34
KAT2B	brown	0.67	1.9e-31	-0.67	1.9e-31	0.24	0.0003	0.29	9.2e-06	0.77	1.1e-45	-0.59	1.9e-22	-0.81	2.6e-53	-0.52	6.8e-17	0.21	0.0011	-0.37	1.1e-08	-0.38	2.7e-09	-0.5	5.1e-16
KCNJ15	brown	-0.42	5.7e-11	0.42	5.7e-11	-0.16	0.017	-0.28	2e-05	-0.34	1.2e-07	0.17	0.012	0.66	1.9e-30	0.33	3.3e-07	-0.35	3.7e-08	0.17	0.012	0.26	8.2e-05	0.71	8.9e-36
KLF10	brown	-0.6	4.5e-24	0.6	4.5e-24	-0.16	0.014	-0.32	1.1e-06	-0.64	7.9e-28	0.28	1.8e-05	0.82	1.8e-55	0.59	6.8e-23	-0.13	0.049	0.4	4.8e-10	0.41	7.9e-11	0.63	1.7e-26
KLF7	brown	-0.57	1.1e-20	0.57	1.1e-20	-0.16	0.017	-0.32	5.8e-07	-0.7	1.2e-34	0.39	1.2e-09	0.88	1.2e-75	0.58	1.3e-21	-0.15	0.026	0.46	2e-13	0.41	8.8e-11	0.64	1.4e-27
L3HYPDH	brown	-0.39	7.3e-10	0.39	7.3e-10	-0.079	0.24	-0.22	0.00079	-0.56	3.5e-20	0.3	4.2e-06	0.73	7.7e-39	0.52	2.7e-17	-0.2	0.0027	0.31	1.9e-06	0.24	0.00024	0.5	1.1e-15
LACTB	brown	-0.43	6.1e-12	0.43	6.1e-12	-0.28	1.7e-05	-0.35	6.2e-08	-0.57	7.7e-21	0.34	1.1e-07	0.71	6.8e-37	0.41	1e-10	0.057	0.39	0.58	3.6e-22	0.51	1.5e-16	0.56	3.3e-20
LAMA1	brown	-0.36	1.8e-08	0.36	1.8e-08	-0.083	0.21	-0.13	0.043	-0.55	1.2e-19	0.29	9.9e-06	0.6	1.5e-23	0.53	1.4e-17	-0.14	0.036	0.34	2e-07	0.23	0.0004	0.25	0.00011
LAMA3	brown	-0.49	2e-15	0.49	2e-15	-0.19	0.0049	-0.3	4.7e-06	-0.59	6.6e-23	0.48	2.4e-14	0.82	3.1e-56	0.4	4.9e-10	-0.28	2.4e-05	0.28	1.5e-05	0.37	6.4e-09	0.64	6.3e-28
LAMB3	brown	-0.47	3.5e-14	0.47	3.5e-14	-0.21	0.0018	-0.3	3e-06	-0.61	3.2e-24	0.56	6e-20	0.79	1.4e-50	0.38	2.8e-09	-0.27	4.3e-05	0.29	1.2e-05	0.32	6.6e-07	0.56	1.9e-20
LAMC2	brown	-0.64	3e-27	0.64	3e-27	-0.28	1.4e-05	-0.34	1.4e-07	-0.78	2.2e-47	0.61	2.1e-24	0.91	4.7e-86	0.52	6.2e-17	-0.13	0.051	0.48	9.1e-15	0.49	4.8e-15	0.59	1.2e-22
LIMA1	brown	-0.52	5.1e-17	0.52	5.1e-17	-0.17	0.011	-0.18	0.0074	-0.61	1.1e-24	0.28	2.1e-05	0.75	2.1e-42	0.49	5.1e-15	-0.12	0.08	0.4	2.7e-10	0.42	2.9e-11	0.51	1.2e-16
LMO4	brown	0.41	1e-10	-0.41	1e-10	0.039	0.56	0.2	0.0026	0.45	5.6e-13	-0.13	0.047	-0.73	1e-38	-0.43	1.2e-11	0.21	0.0013	-0.32	1e-06	-0.32	9e-07	-0.68	1.8e-32
LPAR3	brown	-0.41	8.7e-11	0.41	8.7e-11	-0.33	2.9e-07	-0.31	2.4e-06	-0.39	7.7e-10	0.46	2.2e-13	0.72	1.3e-37	0.17	0.0084	-0.37	9.8e-09	0.13	0.054	0.31	1.4e-06	0.79	2.8e-49
LRP12	brown	-0.52	6.3e-17	0.52	6.3e-17	-0.072	0.28	-0.11	0.1	-0.64	2.2e-27	0.37	6.3e-09	0.71	1.2e-36	0.57	7.9e-21	-0.22	0.00078	0.37	1e-08	0.25	0.00011	0.41	1.3e-10
LTBP1	brown	-0.53	7.2e-18	0.53	7.2e-18	-0.014	0.84	-0.22	0.00068	-0.65	1.5e-28	0.14	0.039	0.76	2e-43	0.67	3.4e-31	-0.07	0.29	0.43	1.3e-11	0.36	1.5e-08	0.48	9.6e-15
MAP3K1	brown	0.55	9.5e-20	-0.55	9.5e-20	-0.019	0.78	0.15	0.028	0.64	3.1e-27	-0.28	1.3e-05	-0.66	1.1e-29	-0.57	5.1e-21	0.12	0.066	-0.41	1.9e-10	-0.33	5.1e-07	-0.35	4.4e-08
MAP7D1	brown	-0.5	6.8e-16	0.5	6.8e-16	-0.039	0.56	-0.34	9.5e-08	-0.48	1e-14	0.19	0.0046	0.76	6.6e-44	0.45	1.1e-12	-0.16	0.015	0.35	5.3e-08	0.43	7.7e-12	0.72	5.1e-38
#####	brown	0.49	2.9e-15	-0.49	2.9e-15	0.37	8.9e-09	0.53	7.7e-18	0.42	5.8e-11	-0.42	2.7e-11	-0.66	3.3e-30	-0.21	0.0012	0.1	0.13	-0.28	1.6e-05	-0.43	1.2e-11	-0.77	1.4e-45
MB21D2	brown	-0.63	7.6e-27	0.63	7.6e-27	-0.22	0.00065	-0.31	1.9e-06	-0.71	1.2e-35	0.43	1.4e-11	0.72	5.9e-38	0.54	6.5e-19	-0.065	0.33	0.43	9.8e-12	0.38	2.8e-09	0.43	1.3e-11
MET	brown	-0.47	4.2e-14	0.47	4.2e-14	-0.22	0.001	-0.2	0.0027	-0.57	7e-21	0.44	3e-12	0.79	3.8e-49	0.34	1e-07	-0.28	2.3e-05	0.27	4.2e-05	0.33	4.4e-07	0.63	4.7e-27
MICAL2	brown	-0.62	4.5e-26	0.62	4.5e-26	-0.15	0.024	-0.39	8.4e-10	-0.81	5.1e-54	0.34	1.2e-07	0.86	1.1e-67	0.79	5.8e-49	0.013	0.84	0.63	2.3e-26	0.49	4.9e-15	0.46	3.2e-13
MICALCL	brown	-0.46	1.8e-13	0.46	1.8e-13	-0.17	0.0088	-0.33	2.8e-07	-0.47	3.4e-14	0.23	0.0004	0.74	5.5e-41	0.37	5.2e-09	-0.2	0.003	0.27	3.1e-05	0.41	1.2e-10	0.72	3.7e-38
MIR31HG	brown	-0.43	6.3e-12	0.43	6.3e-12	-0.15	0.024	-0.31	2.2e-06	-0.45	5.7e-13	0.25	0.00012	0.71	3.1e-36	0.35	4.5e-08	-0.19	0.0045	0.22	0.00082	0.39	1.8e-09	0.66	2.9e-30
MIR503HG	brown	-0.47	6.2e-14	0.47	6.2e-14	-0.019	0.77	-0.31	1.3e-06	-0.53	5.7e-18	0.16	0.014	0.71	3.2e-36	0.59	1.4e-22	-0.15	0.023	0.36	3.6e-08	0.33	3.5e-07	0.52	2.3e-17
MKNK2	brown	0.48	2.5e-14	-0.48	2.5e-14	0.23	0.00055	0.23	0.00047	0.65	3.3e-29	-0.42	5.2e-11	-0.71	1.3e-36	-0.54	6.6e-19	0.015	0.82	-0.49	6.3e-15	-0.41	1.2e-10	-0.4	5.4e-10
MMP1	brown	-0.76	1.1e-44	0.76	1.1e-44	-0.26	8e-05	-0.4	3.6e-10	-0.84	4.8e-61	0.5	1.1e-15	0.9	4.7e-83	0.63	5.2e-27	0.033	0.62	0.65	2.6e-29	0.59	7.3e-23	0.58	6.9e-22
MMP10	brown	-0.59	3.4e-23	0.59	3.4e-23	-0.21	0.0011	-0.36	2.6e-08	-0.73	8.3e-40	0.42	4.8e-11	0.91	3.2e-87	0.6	2.2e-23	-0.091	0.17	0.52	2.8e-17	0.47	7.4e-14	0.61	2.1e-24
MMP13	brown	-0.46	2.4e-13	0.46	2.4e-13	-0.1	0.12	-0.24	0.00027	-0.63	2.9e-26	0.26	5.8e-05	0.76	1.2e-44	0.68	1.1e-32	-0.063	0.34	0.47	4.5e-14	0.41	1e-10	0.43	9.8e-12
MMP3	brown	-0.62	4.6e-26	0.62	4.6e-26	-0.19	0.0049	-0.28	1.4e-05	-0.77	2e-45	0.44	3.7e-12	0.85	3.8e-65	0.62	3.3e-25	-0.037	0.58	0.6	5.3e-24	0.49	6.5e-15	0.51	9.2e-17
MNAT1	brown	-0.32	7.2e-07	0.32	7.2e-07	-0.088	0.19	-0.18	0.0058	-0.52	3.2e-17	0.54	1.3e-18	0.64	4.7e-28	0.28	2e-05	-0.29	9e-06	0.15	0.028	0.16	0.016	0.39	9.5e-10
MRGBP	brown	-0.53	7.1e-18	0.53	7.1e-18	-0.25	0.0001	-0.33	3.8e-07	-0.66	3.3e-30	0.59	1.6e-22	0.77	2.9e-46	0.4	5e-10	-0.19	0.0051	0.32	5.7e-07	0.37	1.3e-08	0.51	2.1e-16
MRPS17	brown	-0.42	5.7e-11	0.42	5.7e-11	-0.23	0.00037	-0.26	7.9e-05	-0.48	2.2e-14	0.47	4.7e-14	0.68	9.6e-33	0.25	0.00014	-0.29	6.5e-06	0.21	0.0012	0.3	3.2e-06	0.61	1.2e-24
MSANTD3	brown	-0.61	2.4e-24	0.61	2.4e-24	-0.16	0.015	-0.35	6.1e-08	-0.77	6.4e-47	0.49	6e-15	0.85	6e-65	0.69	1.2e-33	-0.14	0.033	0.5	1.4e-15	0.4	2.3e-10	0.47	8.9e-14
MT1HL1	brown	-0.31	1.7e-06	0.31	1.7e-06	0.066	0.32	-0.17	0.012	-0.45	1.5e-12	0.17	0.01	0.64	7.7e-28	0.5	8.9e-16	-0.22	0.001	0.3	3.5e-06	0.25	0.00012	0.45	1.5e-12
MT2A	brown	-0.41	1.1e-10	0.41	1.1e-10	0.0071	0.92	-0.25	0.00016	-0.59	6e-23	0.28	1.8e-05	0.75	5.1e-43	0.55	1.1e-19	-0.13	0.046	0.46	2.8e-13	0.4	5.1e-10	0.49	4.3e-15
MYCBP2	brown	0.34	1.6e-07	-0.34	1.6e-07	0.084	0.2	0.069	0.3	0.51	1.4e-16	-0.36	2.2e-08	-0.63	6.6e-27	-0.48	2.5e-14	0.26	9.4e-05	-0.31	1.7e-06	-0.15	0.026	-0.29	8.9e-06
MYH9	brown	-0.62	2.5e-25	0.62	2.5e-25	-0.28	2.2e-05	-0.35	4.5e-08	-0.73	1.6e-39	0.39	7.8e-10	0.8	2.5e-52	0.61	2.7e-24	0.0044	0.95	0.49	7.4e-15	0.41	1.3e-10	0.51	3.5e-16
MYLIP	brown	0.41	1.2e-10	-0.41	1.2e-10	0.2	0.003	0.31	1.6e-06	0.47	3.2e-14	-0.32	1.1e-06	-0.76	2.7e-43	-0.38	2.8e-09	0.21	0.0012	-0.28	2.2e-05	-0.31	2.3e-06	-0.67	1.5e-30
MYO10	brown	-0.54	2.4e-18	0.54	2.4e-18	-0.24	0.00019	-0.29	8.5e-06	-0.64	6.3e-28	0.5	1.3e-15	0.85	1.2e-63	0.49	5.1e-15	-0.32	1.1e-06	0.32	1.1e-06	0.28	1.3e-05	0.63	2.1e-26
MYO1B	brown	-0.69	1.1e-33	0.69	1.1e-33	-0.27	2.7e-05	-0.39	1.5e-09	-0.75	8.3e-43	0.47	1.2e-13	0.91	5.9e-90	0.55	1.1e-19	-0.13	0.051	0.51	1.9e-16	0.52	2.4e-17	0.7	2.9e-35
NAGS	brown	-0.45	9.1e-13	0.45	9.1e-13	-0.24	0.00019	-0.38	4.5e-09	-0.52	6e-17	0.4	6.1e-10	0.7	2.4e-34	0.32	6.9e-07	-0.14	0.033	0.29	8.8e-06	0.35	5.1e-08	0.58	5.4e-22
NAV1	brown	-0.63	2.6e-26	0.63	2.6e-26	-0.11	0.11	-0.3	3.3e-06	-0.65	1.7e-28	0.26	7.1e-05	0.74	1.4e-40	0.61	1.5e-24	-0.16	0.018	0.36	1.8e-08	0.37	1.3e-08	0.52	1.9e-17
NDRG1	brown	-0.42	3.2e-11	0.42	3.2e-11	-0.26	9.5e-05	-0.27	4.1e-05	-0.44	2.1e-12	0.45	7.9e-13	0.65	9.8e-29	0.25	0.00013	-0.31	1.6e-06	0.13	0.043	0.19	0.0033	0.58	7e-22
NEDD4	brown	-0.39	1.1e-09	0.39	1.1e-09	0.1	0.12	-0.23	0.00049	-0.44	2.4e-12	0.17	0.0093	0.64	7.7e-28	0.48	1.5e-14	-0.31	2.3e-06	0.22	0.00088	0.24	0.00023	0.54	2e-18
NFIL3	brown	-0.62	1.4e-25	0.62	1.4e-25	-0.28	1.8e-05	-0.41	2e-10	-0.73	1.7e-38	0.52	4.5e-17	0.78	1.7e-48	0.51	1.9e-16	0.0064	0.92	0.59	1e-22	0.5	4.4e-16	0.52	2.3e-17
NRAS	brown	-0.38	4.3e-09	0.38	4.3e-09	-0.46	4.4e-13	-0.4	4.6e-10	-0.47	4.8e-14	0.6	8e-24	0.62	4.7e-26	0.17	0.012	-0.04	0.55	0.31	2e-06	0.37	1.3e-08	0.51	2e-16
NRG1	brown	-0.48	2.4e-14	0.48	2.4e-14	-0.25	0.00014	-0.35	5.8e-08	-0.53	6.2e-18	0.42	2.1e-11	0.78	2.8e-47	0.27	4.7e-05	-0.17	0.0094	0.31	1.7e-06	0.4	3.3e-10	0.72	3.9e-37
NRIP1	brown	-0.64	5.8e-28	0.64	5.8e-28	-0.21	0.0018	-0.35	8e-08	-0.7	1.2e-34	0.4	2.3e-10	0.81	3.7e-54	0.56	3.7e-20	-0.023	0.73	0.49	2.4e-15	0.51	1.9e-16	0.58	2.8e-22
NT5E	brown	-0.23	0.00044	0.23	0.00044	0.02	0.76	-0.11	0.083	-0.48	2.8e-14	0.12	0.07	0.7	1.9e-35	0.52	6.9e-17	-0.19	0.0047	0.26	6.2e-05	0.22	0.00079	0.44	4.6e-12
OCIAD2	brown	-0.4	3.4e-10	0.4	3.4e-10	-0.25	0.00011	-0.26	8.2e-05	-0.47	6.5e-14	0.38	3e-09	0.69	3.1e-33	0.25	0.00015	-0.15	0.02	0.24	0.00026	0.33	3e-07	0.6	9.9e-24
OGFRL1	brown	0.55	2.2e-19	-0.55	2.2e-19	0.067	0.32	0.35	4.4e-08	0.62	3.4e-25	-0.29	9.3e-06	-0.74	1.6e-41	-0.51	2.3e-16	0.11	0.11	-0.29	6.7e-06	-0.36	1.6e-08	-0.57	7.7e-21
OPN3	brown	-0.34	1e-07	0.34	1e-07	-0.21	0.0014	-0.25	0.00018	-0.49	6.3e-15	0.3	5.2e-06	0.65	6.6e-29	0.42	3.9e-11	-0.1	0.12	0.31	1.3e-06	0.26	7.4e-05	0.46	3.4e-13
OSMR	brown	-0.6	9.1e-24	0.6	9.1e-24	-0.34	1.7e-07	-0.31	2e-06	-0.72	2.1e-37	0.57	1.1e-20	0.79	1.7e-50	0.44	1.9e-12	-0.099	0.14	0.47	3.1e-14	0.41	1.2e-10	0.51	1e-16
OSTM1	brown	-0.42	2.1e-11	0.42	2.1e-11	-0.25	0.00017	-0.34	9e-08	-0.54	2.5e-18	0.27	3.8e-05	0.7	7.7e-35	0.41	1.5e-10	0.033	0.62	0.46	3.2e-13	0.41	1.4e-10	0.57	7.5e-21
P3H2	brown	-0.45	4.8e-13	0.45	4.8e-13	-0.22	0.00068	-0.24	0.00027	-0.46	4.5e-13	0.39	7.2e-10	0.68	4.3e-32	0.29	7.5e-06	-0.28	2.1e-05	0.22	0.001	0.35	6.5e-08	0.63	7.8e-27
P4HA2	brown	-0.48	7.6e-15	0.48	7.6e-15	-0.059	0.38	-0.23	0.00048	-0.6	6.3e-24	0.32	8.1e-07	0.79	1.3e-50	0.62	7.2e-26	-0.34	1.1e-07	0.25	0.00011	0.27	3.9e-05	0.52	2.9e-17
P4HTM	brown	0.27	3.3e-05	-0.27	3.3e-05	0.2	0.0026	0.37	1e-08	0.32	9.9e-07	-0.36	2.7e-08	-0.66	1.8e-29	-0.16	0.014	0.34	1.3e-07	-0.091	0.17	-0.26	5.1e-05	-0.74	5.1e-40
PAIP2B	brown	0.66	3.2e-30	-0.66	3.2e-30	0.29	8.9e-06	0.49	6.6e-15	0.78	5.2e-47	-0.5	4.6e-16	-0.8	7.6e-53	-0.52	5.6e-17	-0.16	0.017	-0.67	4e-31	-0.65	3.4e-29	-0.52	5.6e-17
PANX1	brown	-0.64	9.6e-28	0.64	9.6e-28	-0.15	0.024	-0.41	1.4e-10	-0.7	9e-35	0.41	1.7e-10	0.84	7.8e-63	0.49	2.4e-15	-0.13	0.052	0.45	6.8e-13	0.5	1.2e-15	0.68	6.9e-32
PAPPA	brown	-0.53	1.4e-17	0.53	1.4e-17	-0.15	0.02	-0.28	2.1e-05	-0.64	2.6e-27	0.28	1.7e-05	0.76	5.1e-45	0.61	4.2e-25	-0.078	0.24	0.46	1.5e-13	0.34	1.7e-07	0.46	1.2e-13
PBX1	brown	0.45	1.5e-12	-0.45	1.5e-12	0.35	5.3e-08	0.47	1.1e-13	0.54	1.3e-18	-0.46	1.9e-13	-0.76	4.4e-44	-0.22	0.00079	-0.0089	0.89	-0.42	2.3e-11	-0.53	3.2e-18	-0.73	1.3e-39
PCDH7	brown	-0.41	1.2e-10	0.41	1.2e-10	-0.14	0.038	-0.35	7.6e-08	-0.43	1.1e-11	0.23	0.00035	0.72	3.3e-37	0.43	1.6e-11	-0.2	0.002	0.26	7e-05	0.37	5.8e-09	0.66	1.9e-29
PDGFA	brown	-0.38	3.1e-09	0.38	3.1e-09	-0.033	0.62	-0.11	0.092	-0.58	7.1e-22	0.26	9.8e-05	0.7	2.9e-35	0.53	1.2e-17	-0.29	7.9e-06	0.29	1.1e-05	0.15	0.023	0.39	1.4e-09
PDGFC	brown	-0.41	7.4e-11	0.41	7.4e-11	-0.0024	0.97	-0.015	0.82	-0.6	5.1e-24	0.16	0.016	0.72	2.8e-38	0.7	1.1e-34	-0.23	0.00039	0.3	2.7e-06	0.21	0.0012	0.38	4.1e-09
PDIK1L	brown	0.39	7.7e-10	-0.39	7.7e-10	-0.062	0.35	0.24	0.00026	0.51	1.1e-16	-0.062	0.35	-0.74	2.6e-40	-0.57	2.9e-21	0.16	0.016	-0.39	1.4e-09	-0.33	4.3e-07	-0.53	8.7e-18
PDLIM7	brown	-0.43	1.8e-11	0.43	1.8e-11	0.067	0.31	-0.26	7.5e-05	-0.62	1.2e-25	0.23	0.00038	0.75	2.8e-43	0.65	2.8e-29	-0.23	0.00052	0.34	9.4e-08	0.28	2.5e-05	0.43	6.2e-12
PDPN	brown	-0.64	2.2e-27	0.64	2.2e-27	-0.24	0.00031	-0.42	6.4e-11	-0.81	2.1e-53	0.5	1.5e-15	0.9	3.2e-84	0.66	2.1e-29	-0.022	0.75	0.57	9.5e-21	0.53	1.1e-17	0.54	1e-18
PEBP1	brown	0.61	5.3e-25	-0.61	5.3e-25	0.4	3.2e-10	0.46	2.5e-13	0.7	5.6e-35	-0.62	7.3e-26	-0.74	2.1e-41	-0.42	3.7e-11	-0.12	0.07	-0.58	2.6e-22	-0.55	2.4e-19	-0.51	1.7e-16
PFN1	brown	-0.43	1.9e-11	0.43	1.9e-11	-0.28	1.4e-05	-0.45	9.8e-13	-0.6	8e-24	0.4	2.4e-10	0.61	3.3e-24	0.36	2e-08	0.25	0.00014	0.54	1.3e-18	0.48	1e-14	0.34	2e-07
PHLDB2	brown	-0.56	4.7e-20	0.56	4.7e-20	-0.2	0.0027	-0.27	2.7e-05	-0.6	7.1e-24	0.47	1e-13	0.71	6.8e-36	0.46	3.2e-13	-0.21	0.0014	0.31	2.4e-06	0.31	2.5e-06	0.52	5.8e-17
PI15	brown	-0.45	1.5e-12	0.45	1.5e-12	-0.075	0.26	-0.13	0.048	-0.56	2.5e-20	0.13	0.043	0.71	3.5e-36	0.55	3e-19	-0.054	0.42	0.48	2e-14	0.34	1.4e-07	0.47	6.5e-14
PIK3C2B	brown	0.57	7.8e-21	-0.57	7.8e-21	0.19	0.0042	0.29	9.5e-06	0.71	2.5e-36	-0.58	8.7e-22	-0.78	2.2e-48	-0.5	8.8e-16	0.19	0.005	-0.41	1.7e-10	-0.41	1.9e-10	-0.46	1.4e-13
PLAU	brown	-0.7	7.6e-35	0.7	7.6e-35	-0.27	4.9e-05	-0.41	1.2e-10	-0.82	9.7e-57	0.56	3.9e-20	0.89	6.8e-79	0.62	2.3e-25	-0.048	0.47	0.59	7.6e-23	0.55	1.8e-19	0.55	2.1e-19
PLAUR	brown	-0.65	8.1e-29	0.65	8.1e-29	-0.32	1e-06	-0.34	1.7e-07	-0.78	2.1e-47	0.5	4.8e-16	0.81	3.3e-55	0.56	6.1e-20	0.043	0.51	0.7	2.1e-34	0.55	1.4e-19	0.46	4.5e-13
PLEC	brown	-0.45	1e-12	0.45	1e-12	-0.095	0.15	-0.2	0.0031	-0.55	4.7e-19	0.33	3e-07	0.74	4.9e-41	0.44	2.7e-12	-0.27	3e-05	0.21	0.0011	0.23	0.00036	0.53	5.4e-18
PLEK2	brown	-0.52	6.9e-17	0.52	6.9e-17	-0.28	2e-05	-0.38	2.1e-09	-0.61	4.3e-25	0.58	1.5e-21	0.83	2.1e-58	0.34	1.1e-07	-0.23	0.00037	0.29	1e-05	0.43	8.1e-12	0.67	7.7e-31
PLOD1	brown	-0.63	4.3e-27	0.63	4.3e-27	-0.08	0.23	-0.23	0.00043	-0.76	3.2e-44	0.32	5.4e-07	0.79	1.9e-50	0.75	9.9e-42	-0.14	0.029	0.46	1.8e-13	0.36	1.8e-08	0.39	9.9e-10
PMEPA1	brown	-0.65	2.3e-28	0.65	2.3e-28	-0.082	0.22	-0.24	0.0002	-0.8	4.2e-51	0.29	6.6e-06	0.86	4.1e-69	0.81	1.1e-54	-0.052	0.44	0.52	2.2e-17	0.42	5.3e-11	0.44	2e-12
POPDC3	brown	-0.32	1.1e-06	0.32	1.1e-06	0.3	3e-06	-0.16	0.014	-0.48	1.2e-14	0.14	0.035	0.66	1.2e-29	0.49	2.6e-15	-0.26	6.9e-05	0.24	0.00025	0.22	0.00077	0.44	3.8e-12
PPP1R14C	brown	-0.58	6.7e-22	0.58	6.7e-22	-0.21	0.0013	-0.42	2.5e-11	-0.55	3.6e-19	0.44	2.9e-12	0.8	2.4e-52	0.38	4e-09	-0.3	2.9e-06	0.24	0.00029	0.39	1.6e-09	0.77	2.8e-45
PPP4R4	brown	-0.34	2.1e-07	0.34	2.1e-07	-0.19	0.0034	-0.24	0.00021	-0.5	4.3e-16	0.36	1.6e-08	0.67	2.4e-31	0.31	2.1e-06	-0.18	0.0067	0.25	0.00015	0.22	0.00079	0.48	2.8e-14
PRNP	brown	-0.56	3.4e-20	0.56	3.4e-20	-0.26	5.8e-05	-0.31	1.7e-06	-0.64	1.1e-27	0.44	4.8e-12	0.81	1.9e-53	0.39	1.4e-09	-0.14	0.032	0.36	1.9e-08	0.43	6.8e-12	0.65	2.4e-28
PROCR	brown	-0.55	3.7e-19	0.55	3.7e-19	-0.16	0.018	-0.32	5.3e-07	-0.57	9e-21	0.25	0.0001	0.78	1.1e-47	0.46	3.7e-13	-0.14	0.038	0.41	1.1e-10	0.45	6.7e-13	0.67	1.4e-31
PRXL2C	brown	-0.63	3.8e-26	0.63	3.8e-26	-0.11	0.11	-0.32	6.7e-07	-0.81	1e-53	0.33	2.5e-07	0.8	6e-52	0.66	4.7e-30	0.085	0.2	0.63	1.6e-26	0.53	8.5e-18	0.41	1.9e-10
PTGFRN	brown	-0.63	4.1e-26	0.63	4.1e-26	-0.19	0.0048	-0.33	5.1e-07	-0.6	1.2e-23	0.35	7.5e-08	0.82	1e-55	0.59	2.4e-22	-0.3	3.9e-06	0.31	2.5e-06	0.36	2.1e-08	0.67	1e-30
PTHLH	brown	-0.58	5.5e-22	0.58	5.5e-22	-0.16	0.015	-0.25	0.0001	-0.65	1.1e-28	0.38	5e-09	0.89	3.5e-77	0.54	2e-18	-0.2	0.0028	0.39	1.1e-09	0.39	9.7e-10	0.67	3.7e-31
PTK7	brown	-0.61	4.3e-25	0.61	4.3e-25	-0.23	0.00039	-0.36	2.5e-08	-0.69	4.1e-33	0.39	7.1e-10	0.85	2.5e-66	0.65	1.1e-28	-0.23	0.00053	0.38	3.2e-09	0.38	2.8e-09	0.61	1.2e-24
PTPN12	brown	-0.46	1.3e-13	0.46	1.3e-13	-0.29	1.1e-05	-0.31	2.6e-06	-0.61	4.7e-25	0.51	2.6e-16	0.73	1.3e-38	0.38	3.5e-09	-0.11	0.1	0.4	3.9e-10	0.35	4.9e-08	0.51	9.4e-17
PTPRK	brown	-0.6	6e-24	0.6	6e-24	-0.16	0.016	-0.24	0.00025	-0.75	6.3e-43	0.46	1.7e-13	0.75	5.2e-42	0.57	3e-21	-0.071	0.29	0.44	4.2e-12	0.47	7.8e-14	0.39	1.6e-09
PXN	brown	-0.47	4.8e-14	0.47	4.8e-14	-0.043	0.52	-0.21	0.0017	-0.62	4.8e-26	0.3	2.9e-06	0.82	1.5e-55	0.48	1.1e-14	-0.22	0.0011	0.37	6.3e-09	0.34	1.1e-07	0.57	9.6e-21
QARS	brown	0.67	1.9e-31	-0.67	1.9e-31	0.2	0.0029	0.38	3.9e-09	0.78	3e-47	-0.47	7.9e-14	-0.87	3.8e-72	-0.55	2.6e-19	0.066	0.32	-0.52	1.8e-17	-0.58	1.1e-21	-0.62	3.4e-25
RAB31	brown	-0.67	1e-30	0.67	1e-30	-0.18	0.0073	-0.45	1.1e-12	-0.7	5.4e-35	0.31	1.8e-06	0.79	8.6e-50	0.67	8.3e-31	0.0024	0.97	0.59	1.5e-22	0.52	2.5e-17	0.57	5.6e-21
RBP1	brown	-0.47	9.2e-14	0.47	9.2e-14	-0.17	0.0098	-0.28	2e-05	-0.5	1.2e-15	0.35	3.9e-08	0.76	7.5e-45	0.44	2.2e-12	-0.27	2.8e-05	0.27	3e-05	0.38	2.1e-09	0.66	1.9e-30
REEP3	brown	-0.44	2.2e-12	0.44	2.2e-12	-0.25	0.00012	-0.23	0.0006	-0.48	1.3e-14	0.35	6.7e-08	0.73	5.1e-39	0.42	3.6e-11	-0.23	0.00035	0.27	3.3e-05	0.35	5.4e-08	0.63	3.3e-26
RGS20	brown	-0.5	8.8e-16	0.5	8.8e-16	-0.2	0.003	-0.38	3.2e-09	-0.4	2.2e-10	0.2	0.0023	0.75	5.9e-43	0.31	1.7e-06	-0.24	0.00029	0.25	0.00011	0.41	9.9e-11	0.86	2.1e-69
RNF217	brown	-0.55	4.5e-19	0.55	4.5e-19	-0.16	0.014	-0.27	3.7e-05	-0.49	1.7e-15	0.32	8.7e-07	0.77	8.1e-47	0.43	6.9e-12	-0.39	1.1e-09	0.2	0.0021	0.3	3.6e-06	0.74	2.2e-41
RPS6KC1	brown	-0.57	2.5e-21	0.57	2.5e-21	-0.12	0.072	-0.23	0.00039	-0.62	2.3e-25	0.35	5.5e-08	0.72	3.3e-37	0.53	8.2e-18	-0.15	0.024	0.4	3.8e-10	0.41	9.4e-11	0.5	8.5e-16
RRAS2	brown	-0.43	2e-11	0.43	2e-11	-0.2	0.0024	-0.29	1.2e-05	-0.56	7e-20	0.42	4.1e-11	0.81	5.9e-55	0.34	1.7e-07	-0.2	0.0028	0.29	1.1e-05	0.36	2.6e-08	0.7	9.7e-35
SCARA3	brown	0.52	4.4e-17	-0.52	4.4e-17	0.19	0.0038	0.39	7.2e-10	0.52	7.3e-17	-0.32	1.1e-06	-0.71	5.6e-36	-0.4	4.3e-10	0.13	0.058	-0.35	7.7e-08	-0.51	2.7e-16	-0.66	2e-29
SCAT1	brown	-0.28	1.4e-05	0.28	1.4e-05	-0.1	0.12	-0.23	0.00041	-0.46	1.5e-13	0.31	1.4e-06	0.65	2.3e-28	0.31	1.4e-06	-0.15	0.025	0.26	9.6e-05	0.29	8.9e-06	0.47	9.4e-14
SCG5	brown	-0.47	3.3e-14	0.47	3.3e-14	-0.1	0.12	-0.26	6.3e-05	-0.71	1.6e-36	0.3	3.5e-06	0.82	7e-56	0.7	8.8e-35	-0.061	0.36	0.52	1.7e-17	0.34	1.9e-07	0.4	3e-10
SCRN1	brown	-0.46	1.5e-13	0.46	1.5e-13	-0.081	0.22	-0.15	0.025	-0.6	2e-23	0.29	1.1e-05	0.63	1.3e-26	0.5	9.7e-16	-0.053	0.42	0.28	2.3e-05	0.27	3.3e-05	0.34	1.3e-07
SEC23A	brown	-0.41	7e-11	0.41	7e-11	-0.072	0.28	-0.24	0.00025	-0.59	5.3e-23	0.23	0.00035	0.73	2.5e-39	0.68	5.3e-32	-0.14	0.035	0.37	6.2e-09	0.22	0.00084	0.41	1.1e-10
SEMA3C	brown	-0.58	2.8e-22	0.58	2.8e-22	0.039	0.56	-0.17	0.011	-0.64	7.6e-28	0.22	0.001	0.84	8.3e-61	0.67	1.3e-30	-0.28	1.6e-05	0.32	1e-06	0.32	9.2e-07	0.61	6.8e-25
SERPINE1	brown	-0.64	4e-28	0.64	4e-28	-0.19	0.0049	-0.32	8.1e-07	-0.77	1.4e-46	0.41	1.2e-10	0.92	4.4e-93	0.7	2.4e-34	-0.11	0.11	0.55	8.9e-20	0.46	4.2e-13	0.57	4.7e-21
SERPINE2	brown	-0.42	3e-11	0.42	3e-11	-0.053	0.42	-0.21	0.0015	-0.57	1.2e-20	0.25	0.00012	0.7	1.3e-34	0.44	1.8e-12	-0.088	0.19	0.29	1.1e-05	0.29	8.9e-06	0.46	2.4e-13
SH2D4A	brown	0.44	2.3e-12	-0.44	2.3e-12	-0.0087	0.9	0.3	3.2e-06	0.69	5.4e-33	-0.19	0.004	-0.69	3.4e-34	-0.63	4.2e-27	-0.093	0.16	-0.51	3.6e-16	-0.4	3.6e-10	-0.35	3.7e-08
SH2D5	brown	-0.37	1.1e-08	0.37	1.1e-08	-0.13	0.056	-0.29	1.2e-05	-0.42	3.8e-11	0.26	8e-05	0.73	1e-39	0.24	0.00027	-0.29	8.4e-06	0.18	0.0061	0.26	5.5e-05	0.72	1.6e-37
SHC1	brown	-0.62	1.2e-25	0.62	1.2e-25	-0.25	0.00015	-0.34	2.1e-07	-0.65	3.2e-28	0.33	2.8e-07	0.82	1.4e-55	0.57	5.9e-21	-0.1	0.11	0.46	1.3e-13	0.43	1.2e-11	0.63	7.6e-27
SHISAL1	brown	-0.45	6.1e-13	0.45	6.1e-13	-0.087	0.19	-0.24	0.00021	-0.49	5.5e-15	0.15	0.023	0.71	2.4e-36	0.52	2.2e-17	-0.18	0.0051	0.26	8.4e-05	0.32	1.1e-06	0.56	1.5e-20
SIAH1	brown	-0.47	1.2e-13	0.47	1.2e-13	-0.28	1.4e-05	-0.22	0.00065	-0.55	2.8e-19	0.4	6.2e-10	0.71	1.7e-36	0.39	8.1e-10	-0.17	0.0087	0.25	0.00011	0.3	2.9e-06	0.56	2.2e-20
SLC16A1	brown	-0.67	1.8e-31	0.67	1.8e-31	-0.26	7.5e-05	-0.44	3.9e-12	-0.7	1.8e-34	0.6	2.1e-23	0.85	2.2e-63	0.36	2.6e-08	-0.14	0.031	0.38	2.1e-09	0.52	2.9e-17	0.73	1.7e-38
SLC16A14	brown	0.41	1.7e-10	-0.41	1.7e-10	0.21	0.0013	0.39	1.1e-09	0.58	2.6e-22	-0.39	1.7e-09	-0.7	4.7e-35	-0.38	1.9e-09	-0.077	0.25	-0.49	3.1e-15	-0.5	4.4e-16	-0.5	7.9e-16
SLC18B1	brown	0.35	5.9e-08	-0.35	5.9e-08	0.012	0.86	0.26	6.7e-05	0.51	1.4e-16	-0.2	0.003	-0.64	2.1e-27	-0.44	2.9e-12	0.17	0.012	-0.29	9.1e-06	-0.19	0.0035	-0.46	1.5e-13
SLC25A32	brown	-0.54	2.1e-18	0.54	2.1e-18	-0.3	2.9e-06	-0.26	8.5e-05	-0.7	7.3e-35	0.47	1e-13	0.78	2.7e-47	0.49	5.6e-15	0.065	0.33	0.53	9.4e-18	0.46	4.5e-13	0.49	2.6e-15
SLC2A1	brown	-0.55	2.6e-19	0.55	2.6e-19	-0.34	1.1e-07	-0.36	1.5e-08	-0.44	3.7e-12	0.47	4.1e-14	0.72	3e-38	0.21	0.0014	-0.34	2e-07	0.12	0.061	0.32	9e-07	0.81	2.9e-54
SLC39A14	brown	-0.57	4.2e-21	0.57	4.2e-21	-0.18	0.0059	-0.24	0.00021	-0.79	4.8e-49	0.41	1.3e-10	0.8	8.6e-53	0.68	7.8e-33	-0.058	0.38	0.53	8.5e-18	0.36	2.1e-08	0.37	7.9e-09
SLC3A2	brown	-0.51	1.3e-16	0.51	1.3e-16	-0.26	7.3e-05	-0.31	1.4e-06	-0.5	4.1e-16	0.41	1.8e-10	0.77	4.3e-46	0.31	2e-06	-0.27	2.6e-05	0.23	0.00036	0.35	5.7e-08	0.75	1e-41
SLC52A2	brown	-0.48	1.2e-14	0.48	1.2e-14	-0.28	1.5e-05	-0.24	0.0002	-0.55	3.9e-19	0.41	1.8e-10	0.76	1.1e-44	0.35	3.7e-08	-0.19	0.0034	0.32	6.9e-07	0.38	3.5e-09	0.61	4.8e-25
SLC7A8	brown	-0.43	1.9e-11	0.43	1.9e-11	-0.15	0.026	-0.21	0.0014	-0.41	1.2e-10	0.2	0.002	0.69	6.3e-33	0.38	2e-09	-0.29	1.1e-05	0.16	0.018	0.23	0.00048	0.66	1.2e-29
SMIM3	brown	-0.59	1.1e-22	0.59	1.1e-22	-0.078	0.24	-0.32	9.7e-07	-0.73	7.8e-39	0.27	5.1e-05	0.82	9.5e-58	0.74	1.9e-40	-0.018	0.79	0.61	6.6e-25	0.51	9.7e-17	0.49	2.8e-15
SMS	brown	-0.36	1.7e-08	0.36	1.7e-08	-0.2	0.0021	-0.21	0.0015	-0.55	1.2e-19	0.48	1.4e-14	0.65	1.1e-28	0.35	7.7e-08	-0.086	0.2	0.33	3.1e-07	0.28	2.2e-05	0.38	4.4e-09
SNAI2	brown	-0.66	1.3e-29	0.66	1.3e-29	-0.17	0.011	-0.32	6.5e-07	-0.71	1.2e-35	0.37	1.2e-08	0.9	2.7e-83	0.7	2e-35	-0.26	5.1e-05	0.39	1.1e-09	0.38	3e-09	0.66	4.4e-30
SNAPC1	brown	-0.48	1.6e-14	0.48	1.6e-14	-0.21	0.0013	-0.28	2.4e-05	-0.63	1.2e-26	0.43	6.5e-12	0.75	3.3e-43	0.48	2.3e-14	-0.19	0.0039	0.34	2e-07	0.25	0.00015	0.51	8.6e-17
SPHK1	brown	-0.31	2.4e-06	0.31	2.4e-06	-0.098	0.14	-0.21	0.0013	-0.48	3.1e-14	0.28	1.6e-05	0.67	1.8e-31	0.52	6.8e-17	-0.23	0.00058	0.34	1.9e-07	0.19	0.0047	0.39	9.6e-10
SPIRE1	brown	-0.42	2.3e-11	0.42	2.3e-11	-0.16	0.019	-0.25	0.00016	-0.44	2.2e-12	0.24	0.00028	0.65	3.9e-29	0.36	1.5e-08	-0.25	0.00014	0.24	0.00028	0.27	4.8e-05	0.61	3.4e-24
SPRY4	brown	-0.58	1.7e-21	0.58	1.7e-21	-0.22	0.0007	-0.34	9.2e-08	-0.53	5.6e-18	0.36	1.7e-08	0.74	3.8e-40	0.42	3.3e-11	-0.26	9.3e-05	0.29	8.1e-06	0.28	1.5e-05	0.63	4.6e-27
SPRY4-IT1	brown	-0.5	4.6e-16	0.5	4.6e-16	-0.11	0.085	-0.24	0.00032	-0.58	3.7e-22	0.29	1e-05	0.69	3.9e-34	0.44	2.3e-12	-0.19	0.0048	0.3	3.4e-06	0.28	2.3e-05	0.46	2.7e-13
STARD3NL	brown	-0.45	5.4e-13	0.45	5.4e-13	-0.12	0.08	-0.14	0.03	-0.69	2.2e-33	0.28	2.3e-05	0.69	3.8e-33	0.59	8.9e-23	0.12	0.067	0.57	2.6e-21	0.42	3.8e-11	0.24	0.00029
STC2	brown	-0.51	9.7e-17	0.51	9.7e-17	-0.21	0.0011	-0.33	3.6e-07	-0.66	5.5e-30	0.45	6.1e-13	0.74	7.4e-41	0.46	3.8e-13	-0.17	0.011	0.35	8.3e-08	0.32	8.3e-07	0.48	1.6e-14
STK17A	brown	-0.47	1.1e-13	0.47	1.1e-13	-0.38	2.7e-09	-0.4	6e-10	-0.65	1e-28	0.47	6e-14	0.72	4.1e-37	0.32	5.7e-07	0.23	0.00036	0.52	1.5e-17	0.51	3.6e-16	0.5	8.4e-16
STON2	brown	-0.34	2.1e-07	0.34	2.1e-07	-0.13	0.05	-0.27	2.6e-05	-0.3	5.6e-06	0.26	8.7e-05	0.7	5.6e-35	0.26	5.6e-05	-0.46	2.8e-13	0.037	0.58	0.23	0.00052	0.8	1e-52
STOX2	brown	0.43	9.8e-12	-0.43	9.8e-12	0.12	0.072	0.26	8.6e-05	0.58	5.2e-22	-0.21	0.0011	-0.62	1.6e-25	-0.47	1.1e-13	-0.22	0.00087	-0.52	6.4e-17	-0.47	8.4e-14	-0.38	3.8e-09
STRBP	brown	0.57	2.1e-21	-0.57	2.1e-21	-0.018	0.78	0.25	0.0001	0.6	4.7e-24	-0.15	0.02	-0.78	8.1e-49	-0.58	3.6e-22	0.23	0.00047	-0.36	2.5e-08	-0.41	1.5e-10	-0.61	9.6e-25
STRIP2	brown	-0.44	5.2e-12	0.44	5.2e-12	-0.069	0.3	-0.31	2.1e-06	-0.52	1.7e-17	0.31	1.9e-06	0.74	1.7e-40	0.35	7.6e-08	-0.12	0.072	0.39	1.5e-09	0.41	1.5e-10	0.61	3e-24
SUGCT	brown	-0.43	6.6e-12	0.43	6.6e-12	-0.12	0.072	-0.28	2.1e-05	-0.62	1.1e-25	0.33	2.8e-07	0.77	1.1e-45	0.62	9.1e-26	-0.17	0.0095	0.33	4e-07	0.26	6.8e-05	0.48	8.4e-15
SUSD4	brown	0.52	1.6e-17	-0.52	1.6e-17	0.028	0.67	0.3	4.9e-06	0.72	1.6e-37	-0.19	0.005	-0.81	1.8e-53	-0.59	4.5e-23	-0.045	0.5	-0.53	4.8e-18	-0.5	5.2e-16	-0.53	6.6e-18
SVIP	brown	0.53	6.7e-18	-0.53	6.7e-18	0.04	0.55	0.48	2.3e-14	0.48	1.5e-14	-0.26	9.3e-05	-0.77	5.5e-46	-0.45	9e-13	0.35	3.7e-08	-0.22	0.00098	-0.33	2.3e-07	-0.78	5.4e-48
TANC2	brown	-0.4	2.5e-10	0.4	2.5e-10	-0.19	0.0032	-0.2	0.0024	-0.49	3.5e-15	0.32	1.1e-06	0.76	6.8e-45	0.53	9.2e-18	-0.32	8.2e-07	0.25	0.00012	0.24	0.00024	0.6	1.9e-23
TEAD4	brown	-0.57	1.2e-20	0.57	1.2e-20	0.16	0.014	-0.3	5.2e-06	-0.59	6.5e-23	0.32	8.8e-07	0.72	1.9e-37	0.43	1.5e-11	-0.26	7.2e-05	0.31	1.3e-06	0.36	2.1e-08	0.57	6.8e-21
TENM2	brown	-0.56	2e-20	0.56	2e-20	-0.18	0.0058	-0.38	4.7e-09	-0.53	8.8e-18	0.29	1.1e-05	0.78	2.3e-48	0.46	1.9e-13	-0.23	0.00056	0.32	5.9e-07	0.38	2.3e-09	0.73	1.7e-39
TGFB1	brown	-0.65	1.6e-28	0.65	1.6e-28	-0.3	4.6e-06	-0.45	8.8e-13	-0.7	2.2e-35	0.37	7.4e-09	0.75	1.1e-41	0.48	1e-14	0.18	0.0075	0.58	1.5e-21	0.56	3.1e-20	0.52	3.9e-17
TGFBI	brown	-0.58	3e-22	0.58	3e-22	-0.096	0.15	-0.33	3e-07	-0.79	1.6e-49	0.35	3.7e-08	0.89	3.6e-80	0.7	2e-35	-0.075	0.26	0.53	3.8e-18	0.46	2.2e-13	0.52	3.7e-17
TGFBR1	brown	-0.52	5.9e-17	0.52	5.9e-17	-0.25	0.00011	-0.32	5.9e-07	-0.65	1.8e-28	0.4	3.6e-10	0.71	2.5e-36	0.51	1.6e-16	0.035	0.6	0.46	1.3e-13	0.45	5.7e-13	0.44	1.9e-12
TGIF1	brown	-0.6	4.5e-24	0.6	4.5e-24	-0.37	1.1e-08	-0.27	3.6e-05	-0.64	1.3e-27	0.53	7.6e-18	0.7	2.7e-34	0.4	5.2e-10	-0.1	0.13	0.38	3.7e-09	0.41	1.9e-10	0.46	4.3e-13
THBS1	brown	-0.53	2.8e-18	0.53	2.8e-18	-0.11	0.11	-0.15	0.023	-0.72	9.4e-38	0.28	1.8e-05	0.79	9.4e-51	0.67	2.6e-31	0.02	0.76	0.59	6.1e-23	0.44	5.2e-12	0.39	8e-10
TIFA	brown	0.67	2.2e-31	-0.67	2.2e-31	0.029	0.66	0.33	3.3e-07	0.75	1.6e-42	-0.28	1.4e-05	-0.83	1e-58	-0.64	3e-27	0.065	0.33	-0.51	1.2e-16	-0.48	1.6e-14	-0.55	3.7e-19
TIGAR	brown	-0.45	7.7e-13	0.45	7.7e-13	-0.36	2.8e-08	-0.46	1.3e-13	-0.49	3.5e-15	0.56	1.3e-20	0.63	5.3e-27	0.18	0.0062	0.026	0.7	0.45	9.3e-13	0.52	3.4e-17	0.59	4.6e-23
TLR5	brown	0.37	5.9e-09	-0.37	5.9e-09	0.11	0.087	0.32	7.3e-07	0.48	1.8e-14	-0.26	8.8e-05	-0.71	7.5e-36	-0.36	2.6e-08	0.083	0.21	-0.3	3e-06	-0.31	1.2e-06	-0.62	2.8e-25
TMEM158	brown	-0.55	9.7e-20	0.55	9.7e-20	-0.15	0.025	-0.27	3.4e-05	-0.7	9e-35	0.36	2.7e-08	0.74	1.3e-40	0.63	1.2e-26	-0.094	0.16	0.51	2.6e-16	0.3	2.9e-06	0.4	4.3e-10
TMEM184B	brown	-0.74	6.1e-41	0.74	6.1e-41	-0.15	0.024	-0.25	0.00016	-0.79	6.4e-51	0.41	1.5e-10	0.79	7.3e-51	0.63	1.2e-26	-0.074	0.27	0.46	3.6e-13	0.44	2.8e-12	0.46	2.4e-13
TMTC2	brown	0.4	5.3e-10	-0.4	5.3e-10	-0.026	0.7	0.29	7.1e-06	0.53	7e-18	-0.16	0.017	-0.64	1.1e-27	-0.44	2.2e-12	0.00093	0.99	-0.35	5.6e-08	-0.33	2.4e-07	-0.48	2.2e-14
TNC	brown	-0.6	1.1e-23	0.6	1.1e-23	-0.14	0.03	-0.28	1.6e-05	-0.72	3.3e-37	0.31	1.4e-06	0.78	7.8e-48	0.66	3.9e-30	0.028	0.68	0.56	2.3e-20	0.44	2e-12	0.43	7.9e-12
TNFRSF12A	brown	-0.56	3.2e-20	0.56	3.2e-20	-0.15	0.023	-0.28	2e-05	-0.72	3.6e-38	0.42	2.2e-11	0.92	1.2e-93	0.6	4.5e-24	-0.22	0.00091	0.44	4.5e-12	0.41	9.1e-11	0.63	1.5e-26
TNS4	brown	-0.57	7.6e-21	0.57	7.6e-21	-0.22	0.00085	-0.28	1.4e-05	-0.54	6.1e-19	0.4	5.3e-10	0.78	5.1e-47	0.33	2.6e-07	-0.26	9.4e-05	0.24	0.00023	0.42	5.2e-11	0.71	8.5e-36
TPBG	brown	-0.65	2.9e-29	0.65	2.9e-29	-0.23	0.00035	-0.28	2.1e-05	-0.63	1e-26	0.41	1.7e-10	0.82	1.5e-55	0.45	9.8e-13	-0.28	1.5e-05	0.26	5.4e-05	0.4	5.4e-10	0.68	9.4e-32
TREM1	brown	-0.46	3.2e-13	0.46	3.2e-13	-0.23	0.00045	-0.29	7e-06	-0.62	2.8e-25	0.37	1.2e-08	0.72	2.1e-38	0.44	2.8e-12	-0.079	0.23	0.55	1.3e-19	0.35	6.8e-08	0.48	1.5e-14
TSTD1	brown	0.4	5.3e-10	-0.4	5.3e-10	0.014	0.83	0.3	3.7e-06	0.55	4.9e-19	-0.16	0.019	-0.62	3.2e-25	-0.55	1.8e-19	-0.041	0.53	-0.41	1.6e-10	-0.38	4.8e-09	-0.37	1e-08
TTC7B	brown	-0.5	1.3e-15	0.5	1.3e-15	0.065	0.33	-0.07	0.29	-0.6	9.4e-24	0.067	0.32	0.73	3.4e-39	0.62	1.1e-25	-0.14	0.031	0.39	1.6e-09	0.3	3.6e-06	0.48	1.3e-14
TTPAL	brown	-0.5	5.3e-16	0.5	5.3e-16	-0.34	1.3e-07	-0.31	2.1e-06	-0.61	8.1e-25	0.46	2.7e-13	0.81	2.7e-53	0.43	1.8e-11	-0.12	0.082	0.33	2.4e-07	0.38	3.3e-09	0.62	4.9e-26
TTYH3	brown	-0.55	4.5e-19	0.55	4.5e-19	-0.14	0.032	-0.31	1.8e-06	-0.73	5.8e-39	0.3	5e-06	0.77	1.3e-46	0.67	6.9e-31	-0.00085	0.99	0.59	1.1e-22	0.45	5.4e-13	0.41	2.1e-10
UBE2Q2	brown	-0.5	1.2e-15	0.5	1.2e-15	-0.15	0.023	-0.17	0.0094	-0.49	6.8e-15	0.15	0.027	0.7	5.1e-35	0.45	8.3e-13	-0.21	0.0018	0.24	0.00031	0.24	0.00023	0.63	3.7e-26
UCK2	brown	-0.55	1.6e-19	0.55	1.6e-19	-0.31	1.4e-06	-0.36	1.5e-08	-0.5	1.1e-15	0.57	8.9e-21	0.64	4.7e-28	0.22	0.00073	-0.23	0.00035	0.27	4.4e-05	0.32	9.2e-07	0.6	6.1e-24
VEGFC	brown	-0.33	2.9e-07	0.33	2.9e-07	0.0099	0.88	-0.22	0.001	-0.49	4.5e-15	0.14	0.036	0.74	3e-41	0.48	8.6e-15	-0.14	0.04	0.34	9.7e-08	0.36	2.2e-08	0.53	3.7e-18
VMP1	brown	-0.59	6.1e-23	0.59	6.1e-23	-0.45	5.3e-13	-0.4	3.3e-10	-0.61	7e-25	0.56	2.3e-20	0.62	1e-25	0.42	4.9e-11	0.12	0.06	0.53	4.7e-18	0.49	6.3e-15	0.39	1.8e-09
WDR66	brown	-0.66	1.8e-30	0.66	1.8e-30	-0.27	3.2e-05	-0.37	8e-09	-0.69	1e-33	0.51	2.2e-16	0.9	2.3e-84	0.46	3.3e-13	-0.18	0.0054	0.43	1.8e-11	0.49	4.2e-15	0.76	1.4e-43
XPA	brown	0.54	1.4e-18	-0.54	1.4e-18	0.12	0.061	0.23	0.00041	0.67	1.7e-30	-0.31	1.4e-06	-0.7	1.6e-34	-0.49	3.8e-15	-0.018	0.78	-0.5	7.4e-16	-0.45	1.2e-12	-0.42	4.1e-11
XPR1	brown	-0.59	1.4e-22	0.59	1.4e-22	-0.14	0.04	-0.23	0.00036	-0.73	4.6e-39	0.42	2.2e-11	0.76	2.8e-44	0.53	5.2e-18	-0.04	0.55	0.51	3e-16	0.5	6.5e-16	0.44	3.3e-12
YIF1A	brown	-0.34	1.2e-07	0.34	1.2e-07	-0.072	0.28	-0.076	0.25	-0.42	3e-11	0.13	0.042	0.68	9.8e-32	0.51	1.9e-16	-0.29	9.8e-06	0.22	0.00091	0.23	0.00036	0.52	3.9e-17
YKT6	brown	-0.25	0.0001	0.25	0.0001	-0.2	0.0024	-0.18	0.0066	-0.35	3.7e-08	0.33	2.7e-07	0.72	7.9e-38	0.26	5.9e-05	-0.43	8e-12	0.071	0.29	0.11	0.11	0.68	4.9e-32
ZFP3	brown	0.4	3.3e-10	-0.4	3.3e-10	0.24	0.00019	0.33	3.4e-07	0.44	3.2e-12	-0.25	0.00012	-0.73	3.5e-39	-0.37	6.6e-09	0.19	0.0049	-0.34	1.9e-07	-0.43	6.5e-12	-0.71	5.8e-37
ZFP62	brown	0.42	2.9e-11	-0.42	2.9e-11	0.09	0.17	0.17	0.0094	0.4	5e-10	-0.094	0.16	-0.65	1.3e-28	-0.41	7.6e-11	0.19	0.0046	-0.33	2.5e-07	-0.32	9.5e-07	-0.61	8.1e-25
ZNF114	brown	-0.4	3.2e-10	0.4	3.2e-10	-0.17	0.01	-0.27	4.4e-05	-0.53	7e-18	0.32	8e-07	0.71	1.1e-36	0.38	2.3e-09	-0.13	0.051	0.34	1.1e-07	0.41	1.9e-10	0.55	2.5e-19
ZNF879	brown	0.5	8.2e-16	-0.5	8.2e-16	0.24	0.00022	0.25	0.00014	0.49	3.1e-15	-0.21	0.0013	-0.66	5.5e-30	-0.38	4.6e-09	0.049	0.46	-0.4	3.2e-10	-0.45	8.9e-13	-0.59	1e-22
ZNRD2	brown	-0.38	2.5e-09	0.38	2.5e-09	-0.19	0.0045	-0.21	0.0016	-0.51	1.9e-16	0.36	1.6e-08	0.72	1.7e-37	0.32	1e-06	-0.18	0.0065	0.26	5.1e-05	0.36	1.4e-08	0.57	8.6e-21
ZSCAN16	brown	0.45	6.6e-13	-0.45	6.6e-13	0.072	0.28	0.33	4e-07	0.49	3e-15	-0.27	3.4e-05	-0.76	3.4e-44	-0.45	5.3e-13	0.35	7.3e-08	-0.23	0.0005	-0.28	1.7e-05	-0.7	1.6e-35
ZYX	brown	-0.44	2.7e-12	0.44	2.7e-12	-0.11	0.11	-0.22	0.00072	-0.55	1.9e-19	0.12	0.083	0.59	4.4e-23	0.56	1.4e-20	0.14	0.035	0.57	3.4e-21	0.41	1.1e-10	0.29	9e-06
ABHD17C	green	0.22	0.00076	-0.22	0.00076	-0.29	1.1e-05	0.074	0.26	0.51	2.9e-16	0.11	0.11	-0.4	3.6e-10	-0.64	2.1e-27	-0.051	0.45	-0.35	5.8e-08	-0.16	0.013	-0.0056	0.93
ACTA2	green	0.067	0.31	-0.067	0.31	0.42	3.6e-11	0.43	9.5e-12	-0.091	0.17	-0.45	1.1e-12	0.046	0.49	0.56	3.4e-20	-0.14	0.029	-0.0025	0.97	-0.28	1.8e-05	-0.27	3.2e-05
ACVR1	green	-0.58	3.3e-22	0.58	3.3e-22	-0.02	0.76	-0.052	0.43	-0.64	3.2e-27	0.18	0.0051	0.7	1.6e-35	0.74	3.8e-41	-0.17	0.011	0.39	1.5e-09	0.26	5.2e-05	0.39	1.8e-09
ADAM12	green	-0.6	6.6e-24	0.6	6.6e-24	-0.1	0.11	-0.33	4.5e-07	-0.7	1.7e-35	0.23	0.00044	0.7	1.7e-35	0.89	8.4e-80	0.042	0.53	0.57	4.8e-21	0.36	1.7e-08	0.3	4.3e-06
ADAMTS12	green	-0.58	6.3e-22	0.58	6.3e-22	-0.055	0.41	-0.31	1.8e-06	-0.7	1.2e-34	0.23	0.00056	0.73	6.2e-40	0.88	3.6e-74	-0.075	0.26	0.49	6.2e-15	0.29	6.6e-06	0.34	1.2e-07
ADAMTS2	green	-0.68	1e-32	0.68	1e-32	-0.057	0.4	-0.32	6.7e-07	-0.72	4.7e-38	0.16	0.017	0.73	1.3e-39	0.91	1.7e-86	0.03	0.65	0.6	4.3e-24	0.46	3e-13	0.37	5.8e-09
AEBP1	green	-0.52	2.3e-17	0.52	2.3e-17	0.032	0.63	-0.21	0.0014	-0.65	5.7e-29	0.018	0.79	0.56	2.8e-20	0.94	7.4e-111	0.13	0.05	0.57	4.1e-21	0.33	4.6e-07	0.093	0.16
ALDH1L2	green	-0.41	1.6e-10	0.41	1.6e-10	0.019	0.78	0.16	0.018	-0.5	4.3e-16	0.028	0.68	0.49	3.6e-15	0.64	7.5e-28	-0.0032	0.96	0.37	1e-08	0.24	0.00022	0.18	0.0065
AMPH	green	-0.22	0.00094	0.22	0.00094	0.29	9.9e-06	-0.013	0.84	-0.29	1e-05	-0.26	6.2e-05	0.3	3.6e-06	0.73	1.5e-38	-0.065	0.33	0.25	0.00017	0.025	0.7	0.03	0.65
ANGPTL2	green	-0.41	1.6e-10	0.41	1.6e-10	0.27	4.3e-05	-0.18	0.0072	-0.42	5.1e-11	-0.17	0.012	0.43	7.4e-12	0.82	3.5e-56	-0.048	0.47	0.34	1.1e-07	0.14	0.034	0.13	0.045
ANXA5	green	-0.51	3.3e-16	0.51	3.3e-16	-0.029	0.66	-0.029	0.66	-0.76	2.8e-44	0.24	0.00029	0.73	1.7e-39	0.74	1.9e-41	-0.023	0.73	0.5	1.4e-15	0.33	2.5e-07	0.24	0.00034
ARMCX2	green	-0.06	0.37	0.06	0.37	0.31	1.3e-06	0.37	6.7e-09	-0.22	0.00089	-0.26	7.1e-05	0.094	0.16	0.6	7.4e-24	-0.043	0.52	0.079	0.23	-0.24	0.0003	-0.32	7.5e-07
ASPN	green	-0.56	1.5e-20	0.56	1.5e-20	0.081	0.22	-0.25	0.0001	-0.53	8.9e-18	0.051	0.44	0.42	2.1e-11	0.8	3.8e-51	0.074	0.27	0.42	2.8e-11	0.26	8.6e-05	0.13	0.059
BAG2	green	-0.46	2.2e-13	0.46	2.2e-13	0.094	0.16	-0.24	0.00027	-0.67	1.7e-30	0.23	0.00039	0.64	2.5e-27	0.68	6.6e-33	0.035	0.6	0.45	7.5e-13	0.29	7.4e-06	0.23	0.00055
BCAT1	green	-0.43	9.8e-12	0.43	9.8e-12	-0.081	0.22	-0.13	0.05	-0.62	2.7e-25	0.26	8.3e-05	0.6	1.2e-23	0.66	8.1e-30	0.066	0.32	0.56	3.6e-20	0.29	6.9e-06	0.18	0.0061
BGN	green	-0.53	6.3e-18	0.53	6.3e-18	0.11	0.11	-0.23	0.00053	-0.62	1.8e-25	0.016	0.81	0.6	7.5e-24	0.91	1.5e-86	-0.022	0.75	0.45	4.7e-13	0.21	0.0011	0.21	0.0014
BICC1	green	-0.32	9.6e-07	0.32	9.6e-07	0.21	0.0017	-0.051	0.44	-0.41	1.9e-10	-0.29	6.2e-06	0.37	7.6e-09	0.87	6.8e-70	0.12	0.08	0.44	2.9e-12	0.18	0.0076	0.03	0.65
BNC2	green	0.058	0.38	-0.058	0.38	0.35	7.9e-08	0.088	0.19	-0.1	0.12	-0.33	2.9e-07	0.028	0.68	0.67	9.2e-31	0.015	0.83	0.14	0.04	-0.19	0.0037	-0.31	1.3e-06
C11orf96	green	-0.35	5.7e-08	0.35	5.7e-08	0.041	0.54	-0.09	0.17	-0.53	7e-18	0.066	0.32	0.6	1.1e-23	0.69	1.1e-33	-0.13	0.058	0.42	2.3e-11	0.14	0.029	0.21	0.0014
C1orf216	green	-0.66	2.5e-29	0.66	2.5e-29	0.054	0.42	-0.34	1e-07	-0.76	2.6e-43	0.2	0.0019	0.65	6.1e-29	0.76	2.5e-44	0.13	0.044	0.61	1.8e-24	0.48	2.3e-14	0.27	2.7e-05
C1orf54	green	-0.27	2.6e-05	0.27	2.6e-05	0.18	0.0062	-0.12	0.08	-0.41	7.1e-11	-0.18	0.0063	0.12	0.068	0.59	4.3e-23	0.56	7.8e-20	0.65	1.7e-28	0.36	2.6e-08	-0.26	6.9e-05
C1R	green	-0.34	2.1e-07	0.34	2.1e-07	0.17	0.0099	-0.092	0.16	-0.4	5.6e-10	-0.26	7.7e-05	0.21	0.0018	0.63	2.1e-26	0.43	7.3e-12	0.59	1.9e-22	0.48	9.8e-15	-0.11	0.11
C1S	green	-0.41	9.5e-11	0.41	9.5e-11	0.007	0.92	-0.15	0.02	-0.52	4.8e-17	-0.025	0.71	0.37	1.3e-08	0.59	7.4e-23	0.38	2.5e-09	0.62	4.5e-26	0.55	2.1e-19	0.064	0.34
CALD1	green	-0.49	7.3e-15	0.49	7.3e-15	0.027	0.69	-0.19	0.0048	-0.66	6.6e-30	0.084	0.21	0.74	1.5e-40	0.91	3.6e-89	-0.092	0.16	0.47	8e-14	0.27	2.8e-05	0.33	4e-07
CAVIN1	green	-0.39	1.5e-09	0.39	1.5e-09	0.18	0.0059	-0.095	0.15	-0.47	1e-13	-0.072	0.28	0.67	2.2e-31	0.7	2.5e-35	-0.27	3.4e-05	0.24	0.00022	0.2	0.0029	0.43	7.5e-12
CAVIN3	green	-0.47	4.7e-14	0.47	4.7e-14	0.12	0.071	-0.19	0.0037	-0.63	4.4e-27	0.086	0.19	0.75	1.2e-42	0.79	7.6e-51	-0.19	0.0047	0.42	3.9e-11	0.32	6.1e-07	0.39	9.6e-10
CCDC102B	green	-0.45	1e-12	0.45	1e-12	-0.072	0.28	-0.27	3e-05	-0.51	3.7e-16	0.067	0.32	0.42	3.5e-11	0.61	3.1e-24	0.18	0.0057	0.48	1.4e-14	0.26	6.3e-05	0.1	0.13
CCDC80	green	0.037	0.58	-0.037	0.58	0.5	1.1e-15	0.15	0.02	-0.0012	0.99	-0.49	4.7e-15	-0.16	0.018	0.53	3e-18	0.12	0.063	0.079	0.23	-0.15	0.02	-0.41	1.6e-10
CCDC92	green	-0.31	1.7e-06	0.31	1.7e-06	0.2	0.0023	-0.026	0.7	-0.46	3.7e-13	-0.19	0.004	0.49	2.3e-15	0.63	7.5e-27	-0.028	0.68	0.27	3.7e-05	0.14	0.034	0.17	0.012
CCN1	green	-0.5	9.5e-16	0.5	9.5e-16	-0.069	0.3	-0.12	0.062	-0.58	7.2e-22	0.15	0.024	0.6	7.1e-24	0.65	8.2e-29	0.067	0.32	0.5	4.1e-16	0.37	5.9e-09	0.26	8e-05
CCN2	green	-0.42	3.4e-11	0.42	3.4e-11	0.084	0.21	-0.026	0.7	-0.55	1.9e-19	-0.00029	1	0.57	4e-21	0.81	1.5e-53	-0.0041	0.95	0.5	1.6e-15	0.25	0.00016	0.16	0.013
CCN4	green	-0.66	1.5e-29	0.66	1.5e-29	-0.19	0.0037	-0.34	1.1e-07	-0.74	2.5e-41	0.25	0.00015	0.74	3.5e-41	0.84	6.1e-62	0.13	0.058	0.68	3.8e-32	0.47	4.5e-14	0.38	3.7e-09
CD248	green	-0.17	0.011	0.17	0.011	0.26	6.7e-05	0.094	0.16	-0.21	0.0015	-0.33	3.6e-07	0.25	0.00011	0.61	4.6e-25	-0.18	0.0067	0.12	0.078	-0.057	0.39	0.03	0.65
CD93	green	-0.31	1.9e-06	0.31	1.9e-06	0.28	1.4e-05	-0.059	0.38	-0.39	1.4e-09	-0.29	8.2e-06	0.32	6e-07	0.62	3.4e-25	0.19	0.0042	0.52	4.5e-17	0.22	0.00082	0.033	0.62
CDH11	green	-0.56	5.5e-20	0.56	5.5e-20	-0.048	0.47	-0.23	0.00036	-0.69	4.2e-33	0.14	0.035	0.62	1.2e-25	0.91	7.5e-86	0.091	0.17	0.54	8.6e-19	0.3	4.1e-06	0.18	0.0055
CHN1	green	-0.6	2.4e-23	0.6	2.4e-23	-0.13	0.054	-0.4	3.4e-10	-0.77	3.3e-45	0.19	0.0032	0.65	9.7e-29	0.8	1.9e-52	0.28	1.3e-05	0.7	3.7e-35	0.49	5e-15	0.22	0.00073
CHSY3	green	-0.51	2.6e-16	0.51	2.6e-16	-0.045	0.5	-0.28	1.6e-05	-0.65	3e-29	0.14	0.036	0.67	1.4e-30	0.86	4.2e-69	0.02	0.77	0.52	3.2e-17	0.34	2e-07	0.27	4e-05
CLEC11A	green	-0.41	1.3e-10	0.41	1.3e-10	0.014	0.83	-0.23	0.00056	-0.51	1.5e-16	0.028	0.67	0.6	2.3e-23	0.85	7.7e-66	-0.16	0.019	0.37	1.3e-08	0.15	0.02	0.28	2e-05
CLMP	green	-0.39	7.6e-10	0.39	7.6e-10	0.11	0.098	-0.18	0.0076	-0.56	1.7e-20	-0.021	0.75	0.67	4.7e-31	0.79	1.5e-49	-0.007	0.92	0.45	7.3e-13	0.29	6.4e-06	0.33	2.6e-07
CLSTN2	green	-0.09	0.17	0.09	0.17	0.24	0.00027	0.0084	0.9	-0.22	0.001	-0.14	0.037	0.16	0.019	0.6	5.5e-24	-0.072	0.28	0.14	0.038	-0.1	0.12	-0.14	0.039
CNRIP1	green	0.11	0.086	-0.11	0.086	0.49	4.4e-15	0.18	0.0069	0.015	0.82	-0.63	6.9e-27	-0.077	0.25	0.6	5.8e-24	0.082	0.22	0.12	0.074	-0.23	0.0004	-0.31	1.3e-06
COL10A1	green	-0.46	1.4e-13	0.46	1.4e-13	-0.1	0.11	-0.24	0.00033	-0.66	2.3e-29	0.28	1.6e-05	0.61	2.4e-24	0.79	4.6e-50	0.019	0.77	0.52	3.3e-17	0.26	9.4e-05	0.17	0.012
COL11A1	green	-0.48	2.2e-14	0.48	2.2e-14	-0.13	0.046	-0.23	0.00036	-0.61	5.2e-25	0.22	0.001	0.62	3.9e-25	0.81	6.6e-55	-0.036	0.58	0.47	8.5e-14	0.28	1.8e-05	0.25	0.00017
COL12A1	green	-0.59	4.2e-23	0.59	4.2e-23	-0.07	0.29	-0.25	0.00015	-0.67	5.2e-31	0.18	0.0057	0.78	6.1e-48	0.86	1e-67	-0.14	0.037	0.48	7.6e-15	0.37	1.1e-08	0.46	2.3e-13
COL16A1	green	-0.69	7.1e-34	0.69	7.1e-34	-0.11	0.11	-0.34	1.3e-07	-0.73	2.8e-39	0.25	0.00011	0.68	1.1e-31	0.75	9.6e-43	0.018	0.79	0.5	3.9e-16	0.44	3e-12	0.32	6.4e-07
COL18A1	green	-0.49	2.1e-15	0.49	2.1e-15	0.086	0.2	-0.26	9.4e-05	-0.52	3.1e-17	-0.051	0.44	0.52	4e-17	0.78	1.1e-47	-0.011	0.87	0.41	1.8e-10	0.26	9.3e-05	0.19	0.0041
COL1A1	green	-0.77	9.3e-47	0.77	9.3e-47	-0.097	0.14	-0.34	9.9e-08	-0.75	9.9e-43	0.24	0.00028	0.71	9.4e-37	0.87	3.2e-71	0.026	0.69	0.55	9.7e-20	0.45	1.1e-12	0.35	4.4e-08
COL1A2	green	-0.67	1.6e-31	0.67	1.6e-31	-0.011	0.87	-0.28	2.5e-05	-0.7	2e-35	0.14	0.039	0.65	2.6e-29	0.92	6e-95	0.023	0.73	0.54	9.2e-19	0.38	2.2e-09	0.26	6.7e-05
COL3A1	green	-0.66	3.2e-30	0.66	3.2e-30	0.015	0.83	-0.3	4.4e-06	-0.69	1.4e-33	0.12	0.061	0.62	4.7e-26	0.92	2.3e-93	0.074	0.26	0.56	2.2e-20	0.37	5.6e-09	0.23	0.0004
COL4A1	green	-0.81	3.7e-54	0.81	3.7e-54	-0.17	0.012	-0.41	1.7e-10	-0.88	4.8e-74	0.42	3e-11	0.86	6.1e-68	0.74	1.4e-41	0.032	0.63	0.64	4.8e-28	0.55	2.8e-19	0.49	7.2e-15
COL4A2	green	-0.77	6.8e-47	0.77	6.8e-47	-0.11	0.095	-0.33	2.3e-07	-0.85	5.5e-66	0.33	2.4e-07	0.83	5.1e-59	0.78	7.4e-49	0.03	0.66	0.63	2e-26	0.52	3.2e-17	0.42	3.6e-11
COL5A1	green	-0.67	3e-31	0.67	3e-31	-0.014	0.83	-0.29	6.8e-06	-0.72	5e-38	0.18	0.0073	0.75	9.6e-42	0.93	2.3e-97	-0.072	0.28	0.5	5.4e-16	0.36	1.6e-08	0.35	4.3e-08
COL5A2	green	-0.71	5.5e-37	0.71	5.5e-37	-0.069	0.3	-0.33	3.1e-07	-0.76	1.7e-44	0.26	8.2e-05	0.78	3.1e-48	0.91	7e-87	-0.028	0.67	0.56	1.5e-20	0.42	2.5e-11	0.4	5.6e-10
COL5A3	green	-0.41	1.8e-10	0.41	1.8e-10	0.0075	0.91	-0.29	6.8e-06	-0.55	2.2e-19	0.084	0.2	0.7	1.5e-35	0.8	2.7e-52	-0.2	0.0029	0.35	5.6e-08	0.17	0.011	0.39	9.3e-10
COL6A1	green	-0.55	4e-19	0.55	4e-19	-0.016	0.82	-0.26	7.6e-05	-0.64	3.9e-28	0.11	0.11	0.7	2.3e-35	0.89	2.9e-79	-0.1	0.13	0.44	2.3e-12	0.26	5.4e-05	0.33	4.2e-07
COL6A2	green	-0.47	5.5e-14	0.47	5.5e-14	0.17	0.0096	-0.14	0.037	-0.56	7.9e-20	-0.12	0.082	0.52	3.1e-17	0.93	1.2e-97	0.016	0.81	0.44	2.5e-12	0.21	0.0016	0.092	0.17
COL6A3	green	-0.75	5.6e-43	0.75	5.6e-43	-0.032	0.63	-0.35	7.2e-08	-0.79	1.6e-49	0.22	0.00081	0.7	4.1e-35	0.9	2.4e-81	0.12	0.073	0.62	4.7e-26	0.45	5.1e-13	0.29	1.1e-05
COL8A1	green	-0.62	2.8e-25	0.62	2.8e-25	-0.015	0.82	-0.24	0.00022	-0.69	1.6e-33	0.2	0.0025	0.68	1.5e-32	0.87	1e-71	-0.058	0.39	0.48	9.8e-15	0.29	1e-05	0.31	2.5e-06
COL8A2	green	-0.33	2.7e-07	0.33	2.7e-07	-0.028	0.67	-0.11	0.094	-0.46	3.6e-13	0.14	0.032	0.36	2.9e-08	0.66	5.8e-30	-0.003	0.96	0.31	1.3e-06	0.15	0.022	-0.022	0.75
COLEC12	green	0.071	0.29	-0.071	0.29	0.4	2.3e-10	0.068	0.3	-0.084	0.21	-0.4	5.2e-10	-0.05	0.46	0.6	2e-23	0.19	0.0032	0.25	0.00018	-0.058	0.39	-0.34	2e-07
CPQ	green	-0.065	0.33	0.065	0.33	0.31	1.2e-06	0.18	0.0065	-0.24	0.00025	-0.41	1e-10	0.081	0.22	0.68	7.4e-32	0.18	0.0067	0.3	4.7e-06	-0.011	0.86	-0.3	4.8e-06
CPXM1	green	-0.51	1.2e-16	0.51	1.2e-16	-0.012	0.86	-0.29	1.1e-05	-0.51	1.7e-16	-0.053	0.43	0.5	5.5e-16	0.82	2e-57	0.099	0.14	0.48	8.8e-15	0.34	1.9e-07	0.2	0.0028
CPZ	green	-0.18	0.0055	0.18	0.0055	0.076	0.25	-0.033	0.62	-0.22	0.00077	-0.19	0.0045	0.24	0.00021	0.6	2e-23	-0.028	0.68	0.2	0.0021	0.11	0.11	0.015	0.82
CRISPLD2	green	-0.58	1.1e-21	0.58	1.1e-21	0.06	0.37	-0.2	0.0028	-0.57	4.6e-21	-0.056	0.4	0.64	6.1e-28	0.8	2.2e-51	-0.086	0.19	0.48	2.4e-14	0.34	1.1e-07	0.39	1.2e-09
CTHRC1	green	-0.73	7.1e-40	0.73	7.1e-40	-0.13	0.049	-0.35	7.3e-08	-0.8	8.8e-53	0.3	4.1e-06	0.67	1.5e-31	0.86	7.4e-69	0.18	0.0054	0.65	6.4e-29	0.48	1.6e-14	0.23	0.00048
CTSK	green	-0.54	8.4e-19	0.54	8.4e-19	0.043	0.52	-0.22	0.00086	-0.58	1.5e-21	-0.011	0.87	0.46	2.4e-13	0.89	7.2e-78	0.21	0.0017	0.59	4.9e-23	0.36	3.1e-08	0.079	0.24
CYS1	green	-0.015	0.82	0.015	0.82	0.25	0.00012	0.023	0.74	-0.14	0.041	-0.28	2.3e-05	0.081	0.23	0.62	2.2e-25	0.0054	0.94	0.095	0.15	-0.12	0.061	-0.18	0.0055
DAAM2	green	0.071	0.29	-0.071	0.29	0.49	3.1e-15	0.27	4.8e-05	-0.0058	0.93	-0.61	7.2e-25	0.0085	0.9	0.59	6e-23	-0.14	0.041	-0.024	0.72	-0.24	0.00019	-0.18	0.0052
DAB2	green	-0.064	0.33	0.064	0.33	0.34	1.6e-07	0.14	0.036	-0.19	0.0034	-0.45	1e-12	0.031	0.64	0.65	6.3e-29	0.31	2.1e-06	0.41	1.3e-10	0.067	0.32	-0.31	2.7e-06
DACT1	green	-0.37	7.4e-09	0.37	7.4e-09	0.12	0.081	-0.16	0.015	-0.6	2.5e-23	0.085	0.2	0.56	2.6e-20	0.89	3.5e-78	0.007	0.92	0.44	4.4e-12	0.18	0.0081	0.083	0.21
DCN	green	0.055	0.41	-0.055	0.41	0.39	7.3e-10	0.18	0.0059	-0.034	0.61	-0.52	6.7e-17	-0.0073	0.91	0.61	1.6e-24	0.0028	0.97	0.12	0.081	-0.15	0.026	-0.22	0.00096
DDR2	green	0.029	0.67	-0.029	0.67	0.43	8.2e-12	0.21	0.0015	-0.12	0.079	-0.51	1.3e-16	0.064	0.33	0.68	1.8e-32	0.018	0.79	0.12	0.07	-0.19	0.0044	-0.25	0.00011
DKK3	green	-0.46	2.1e-13	0.46	2.1e-13	0.0065	0.92	-0.17	0.009	-0.58	1.6e-21	0.14	0.034	0.75	3e-43	0.71	1.8e-36	-0.23	0.00061	0.32	7.1e-07	0.27	4.6e-05	0.44	5.7e-12
DNM3OS	green	-0.38	4.6e-09	0.38	4.6e-09	0.21	0.0012	-0.13	0.047	-0.32	7.2e-07	-0.21	0.0015	0.3	3.9e-06	0.78	1.2e-47	0.056	0.4	0.31	2.5e-06	0.15	0.025	0.056	0.4
DZIP1	green	-0.36	2.2e-08	0.36	2.2e-08	0.033	0.62	-0.18	0.0075	-0.55	1.5e-19	0.2	0.002	0.45	1e-12	0.66	2e-29	0.0073	0.91	0.35	4.2e-08	0.21	0.0016	0.029	0.67
ECM2	green	-0.015	0.83	0.015	0.83	0.38	3.3e-09	0.048	0.47	-0.039	0.56	-0.48	1.4e-14	-0.083	0.21	0.6	6.9e-24	0.081	0.22	0.12	0.078	-0.073	0.27	-0.28	1.7e-05
EDIL3	green	-0.45	1.1e-12	0.45	1.1e-12	-0.15	0.028	-0.22	0.00091	-0.51	2.7e-16	0.18	0.0055	0.55	1.3e-19	0.71	7.9e-36	-0.17	0.0084	0.28	1.5e-05	0.17	0.012	0.28	1.9e-05
EDNRA	green	-0.32	6.7e-07	0.32	6.7e-07	0.14	0.041	-0.074	0.26	-0.46	1.3e-13	-0.084	0.2	0.63	1.4e-26	0.8	3.2e-51	-0.17	0.012	0.29	6.4e-06	0.15	0.022	0.3	3.4e-06
EFEMP2	green	-0.26	8.2e-05	0.26	8.2e-05	0.31	2.3e-06	0.04	0.55	-0.39	6.6e-10	-0.28	2e-05	0.29	6.3e-06	0.88	2.2e-73	0.026	0.69	0.32	1.1e-06	0.0062	0.93	-0.14	0.03
EGFL6	green	-0.56	1.6e-20	0.56	1.6e-20	-0.28	2.3e-05	-0.34	1.6e-07	-0.5	5.2e-16	0.24	0.00031	0.48	9.2e-15	0.57	2.5e-21	0.069	0.3	0.51	1.7e-16	0.49	5.6e-15	0.3	5e-06
EMILIN1	green	-0.49	4.1e-15	0.49	4.1e-15	0.034	0.61	-0.24	0.00022	-0.61	4.7e-25	0.062	0.35	0.58	1.1e-21	0.87	4.8e-71	0.068	0.3	0.55	2.5e-19	0.28	1.5e-05	0.16	0.016
EML1	green	-0.33	3.8e-07	0.33	3.8e-07	0.072	0.28	-0.13	0.043	-0.37	1.1e-08	-0.15	0.02	0.57	2.9e-21	0.67	1.9e-31	-0.17	0.012	0.25	0.00013	0.12	0.081	0.44	3.4e-12
ENC1	green	-0.17	0.0084	0.17	0.0084	0.072	0.28	0.085	0.2	-0.43	2e-11	0.004	0.95	0.49	3.1e-15	0.64	2.6e-27	-0.14	0.035	0.27	2.6e-05	0.12	0.068	0.11	0.11
ENPEP	green	-0.48	1.4e-14	0.48	1.4e-14	0.0021	0.97	-0.28	2e-05	-0.6	2.6e-23	0.16	0.019	0.75	2.8e-43	0.69	4.2e-34	-0.2	0.0019	0.37	9.3e-09	0.27	3.3e-05	0.5	4.8e-16
F2RL2	green	-0.67	1.7e-31	0.67	1.7e-31	0.021	0.75	-0.21	0.0011	-0.6	9.5e-24	0.12	0.071	0.59	1.3e-22	0.74	5.1e-41	0.025	0.71	0.42	4.3e-11	0.39	1.7e-09	0.32	1.1e-06
FAP	green	-0.68	1.3e-32	0.68	1.3e-32	-0.058	0.38	-0.31	2.5e-06	-0.78	2.9e-47	0.25	0.00016	0.79	1.1e-50	0.9	2.5e-84	0.024	0.72	0.61	2.5e-24	0.43	1.2e-11	0.37	6.9e-09
FBLN2	green	-0.21	0.0015	0.21	0.0015	0.33	2.7e-07	0.031	0.64	-0.26	5.1e-05	-0.32	7.1e-07	0.16	0.017	0.74	1.9e-40	0.029	0.67	0.25	0.00012	0.07	0.3	-0.18	0.0071
FBN1	green	-0.17	0.0095	0.17	0.0095	0.41	1.9e-10	0.085	0.2	-0.29	9.9e-06	-0.34	1.8e-07	0.24	0.00023	0.83	6e-60	-0.018	0.78	0.28	1.4e-05	0.024	0.72	-0.12	0.061
FBN2	green	-0.45	8e-13	0.45	8e-13	-0.15	0.026	-0.3	3.6e-06	-0.56	2.3e-20	0.32	5.9e-07	0.61	3e-24	0.55	1.2e-19	-0.017	0.8	0.38	4.8e-09	0.26	5.7e-05	0.31	1.5e-06
FBXL7	green	0.058	0.38	-0.058	0.38	0.43	1.6e-11	0.19	0.0041	0.0001	1	-0.52	1.8e-17	-0.034	0.61	0.6	1.5e-23	-0.046	0.49	0.057	0.39	-0.22	0.00079	-0.28	1.4e-05
FERMT2	green	-0.21	0.0017	0.21	0.0017	0.36	2.8e-08	0.11	0.085	-0.44	3.7e-12	-0.19	0.0034	0.5	5.1e-16	0.85	4.5e-64	-0.16	0.016	0.29	1.1e-05	-0.0096	0.89	0.065	0.33
FHOD3	green	-0.29	1.1e-05	0.29	1.1e-05	0.14	0.032	-0.058	0.39	-0.54	1.5e-18	0.1	0.13	0.48	3.1e-14	0.71	6e-37	-0.075	0.26	0.33	5e-07	0.21	0.0018	0.0066	0.92
FIBIN	green	0.33	2.3e-07	-0.33	2.3e-07	0.53	8e-18	0.34	1.6e-07	0.22	0.00082	-0.57	2.3e-21	-0.15	0.02	0.44	3.9e-12	-0.25	0.00013	-0.17	0.011	-0.38	4.8e-09	-0.29	1.2e-05
FILIP1L	green	-0.25	0.00013	0.25	0.00013	0.29	6.6e-06	-0.078	0.24	-0.4	5.3e-10	-0.18	0.0068	0.35	8.1e-08	0.74	2.5e-40	0.066	0.32	0.33	5e-07	0.11	0.089	-0.016	0.81
FKBP10	green	-0.31	1.7e-06	0.31	1.7e-06	0.048	0.47	-0.057	0.39	-0.38	3.9e-09	-0.069	0.3	0.42	2.3e-11	0.67	1e-30	-0.12	0.079	0.29	8.6e-06	0.11	0.11	0.15	0.02
FKBP14	green	-0.48	2.3e-14	0.48	2.3e-14	-0.18	0.007	-0.18	0.0061	-0.67	1.3e-31	0.31	1.7e-06	0.74	5.1e-40	0.72	9.3e-38	-0.11	0.084	0.4	3.1e-10	0.24	0.00023	0.33	2.4e-07
FKBP7	green	-0.23	0.00038	0.23	0.00038	0.23	0.00035	0.12	0.075	-0.38	1.9e-09	-0.15	0.021	0.34	1.1e-07	0.83	6e-59	-0.12	0.067	0.21	0.0016	-0.051	0.45	-0.081	0.22
FKBP9	green	-0.46	4.2e-13	0.46	4.2e-13	0.11	0.11	-0.031	0.64	-0.47	1.1e-13	-0.058	0.38	0.62	3.3e-25	0.71	8.6e-37	-0.34	1.1e-07	0.19	0.0041	0.12	0.064	0.4	5.1e-10
FMOD	green	-0.32	6.6e-07	0.32	6.6e-07	0.22	0.00082	0.23	0.00036	-0.33	2.6e-07	-0.36	2.5e-08	0.17	0.0084	0.64	6.1e-28	0.24	0.00021	0.33	2.4e-07	0.13	0.054	-0.14	0.033
FN1	green	-0.45	5.8e-13	0.45	5.8e-13	0.091	0.17	-0.19	0.0034	-0.66	2.5e-29	0.15	0.027	0.69	4.1e-33	0.9	2.8e-83	-0.097	0.14	0.5	1.1e-15	0.26	5.4e-05	0.24	0.00031
FNDC1	green	-0.42	2.3e-11	0.42	2.3e-11	0.2	0.0029	-0.15	0.024	-0.47	3.1e-14	-0.082	0.21	0.45	5.8e-13	0.84	4e-61	0.0078	0.91	0.43	1.2e-11	0.18	0.0054	0.13	0.046
FZD1	green	-0.34	1.3e-07	0.34	1.3e-07	0.0072	0.91	-0.074	0.26	-0.42	5.3e-11	0.052	0.43	0.4	4.5e-10	0.76	8.5e-45	-0.1	0.12	0.25	0.00013	0.05	0.45	0.07	0.29
GALNT10	green	-0.32	9.3e-07	0.32	9.3e-07	0.12	0.063	-0.17	0.0094	-0.55	1.2e-19	-0.037	0.58	0.54	2.8e-18	0.76	8.8e-44	0.13	0.051	0.47	1e-13	0.31	2.5e-06	0.16	0.016
GALNT15	green	-0.29	7e-06	0.29	7e-06	0.18	0.0067	-0.023	0.73	-0.36	3.1e-08	-0.2	0.002	0.39	9.2e-10	0.71	9.9e-36	-0.017	0.79	0.38	1.8e-09	0.1	0.12	0.14	0.04
GAS1	green	-0.47	5.4e-14	0.47	5.4e-14	0.017	0.8	-0.18	0.0053	-0.61	3.3e-24	0.056	0.4	0.62	1.1e-25	0.85	1.9e-63	-0.023	0.73	0.49	2.1e-15	0.33	4.3e-07	0.25	0.00013
GASK1B	green	-0.4	4.5e-10	0.4	4.5e-10	0.12	0.062	0.01	0.88	-0.56	1.6e-20	-0.058	0.38	0.51	1.2e-16	0.9	3e-83	0.044	0.51	0.52	7.4e-17	0.23	0.0006	0.059	0.38
GEM	green	-0.43	7.4e-12	0.43	7.4e-12	-0.072	0.28	-0.14	0.031	-0.56	6.8e-20	0.12	0.077	0.44	4.7e-12	0.63	4.9e-27	0.23	0.00035	0.48	9.4e-15	0.29	1e-05	0.017	0.8
GFPT2	green	-0.36	1.8e-08	0.36	1.8e-08	0.049	0.46	-0.13	0.044	-0.56	1.5e-20	0.04	0.55	0.61	2.4e-24	0.75	1.2e-42	-0.021	0.75	0.55	4.1e-19	0.23	0.00035	0.2	0.003
GGT5	green	-0.38	2.5e-09	0.38	2.5e-09	0.19	0.0033	-0.095	0.15	-0.53	6.8e-18	-0.2	0.002	0.49	6.5e-15	0.8	1.4e-51	0.16	0.018	0.54	9.7e-19	0.3	4.1e-06	0.096	0.15
GLIS2	green	-0.32	1.1e-06	0.32	1.1e-06	0.066	0.32	-0.06	0.37	-0.49	3.1e-15	0.045	0.5	0.32	5.6e-07	0.68	7e-33	0.083	0.21	0.39	7.1e-10	0.16	0.014	-0.13	0.044
GLIS3	green	-0.45	4.8e-13	0.45	4.8e-13	0.015	0.82	-0.12	0.061	-0.65	2.5e-28	0.076	0.25	0.66	2.3e-30	0.88	1.4e-73	0.01	0.88	0.55	2.8e-19	0.26	9.4e-05	0.21	0.0015
GLT8D2	green	-0.24	0.00023	0.24	0.00023	0.3	2.9e-06	0.0087	0.9	-0.37	1.3e-08	-0.3	4.1e-06	0.39	1.3e-09	0.89	1.1e-80	-0.035	0.6	0.32	1.1e-06	0.051	0.45	0.03	0.65
GPC6	green	-0.29	6.3e-06	0.29	6.3e-06	0.14	0.037	-0.061	0.36	-0.49	6.1e-15	-0.026	0.69	0.43	1.4e-11	0.85	1.2e-64	0.003	0.96	0.38	2.4e-09	0.068	0.31	-0.012	0.86
GPM6B	green	-0.077	0.24	0.077	0.24	0.12	0.07	0.024	0.72	-0.21	0.0015	-0.2	0.0022	0.4	2.7e-10	0.64	6.2e-28	-0.3	4.3e-06	0.13	0.053	-0.073	0.27	0.2	0.0027
GPR176	green	-0.57	1.2e-20	0.57	1.2e-20	-0.19	0.0034	-0.29	6.5e-06	-0.68	3e-32	0.27	2.7e-05	0.69	2.7e-33	0.64	1.3e-27	0.072	0.28	0.55	3.5e-19	0.37	1.2e-08	0.37	1.1e-08
GPX7	green	-0.37	1.3e-08	0.37	1.3e-08	-0.072	0.28	-0.13	0.053	-0.58	3.3e-22	0.12	0.061	0.39	6.8e-10	0.71	6.3e-36	0.27	3.7e-05	0.5	5.2e-16	0.23	0.00046	-0.11	0.11
GPX8	green	-0.5	1.3e-15	0.5	1.3e-15	0.087	0.19	-0.0017	0.98	-0.6	1.4e-23	0.056	0.4	0.62	1.6e-25	0.87	3.5e-70	-0.13	0.054	0.39	1.1e-09	0.24	0.00023	0.21	0.0016
GREM1	green	-0.76	6.8e-45	0.76	6.8e-45	-0.21	0.0011	-0.44	4.4e-12	-0.82	2.7e-56	0.41	8.2e-11	0.76	1.1e-43	0.73	1.3e-39	0.17	0.0095	0.67	3e-31	0.53	1e-17	0.36	2.7e-08
GUCY1A1	green	-0.18	0.0067	0.18	0.0067	0.28	2.4e-05	0.048	0.47	-0.34	1.3e-07	-0.25	0.00012	0.23	0.00039	0.73	1.1e-39	0.14	0.035	0.26	5.9e-05	0.049	0.46	-0.16	0.016
GUCY1B1	green	-0.42	3e-11	0.42	3e-11	0.078	0.24	-0.18	0.0054	-0.62	1.8e-25	0.081	0.22	0.43	7.2e-12	0.79	3.3e-50	0.19	0.0041	0.5	8.2e-16	0.25	0.00013	-0.083	0.21
GXYLT2	green	-0.24	0.00025	0.24	0.00025	0.23	0.00054	0.17	0.011	-0.37	8e-09	-0.15	0.02	0.26	7.4e-05	0.8	2.1e-52	-0.033	0.62	0.25	0.00017	0.015	0.82	-0.17	0.0082
HEPH	green	-0.37	7.7e-09	0.37	7.7e-09	0.091	0.17	-0.064	0.34	-0.44	2.1e-12	-0.17	0.0094	0.45	5.7e-13	0.87	3.4e-71	-0.031	0.64	0.38	2.5e-09	0.14	0.032	0.11	0.1
HMCN1	green	-0.23	0.00048	0.23	0.00048	0.28	1.9e-05	0.014	0.83	-0.18	0.0077	-0.34	1.3e-07	0.1	0.13	0.69	9.1e-34	0.045	0.5	0.17	0.0097	-0.039	0.55	-0.1	0.12
HSD17B8	green	0.53	5e-18	-0.53	5e-18	0.047	0.48	0.29	8e-06	0.66	2.4e-30	-0.19	0.0041	-0.62	1.1e-25	-0.62	4.3e-26	-0.16	0.014	-0.6	1.7e-23	-0.52	5.3e-17	-0.28	1.3e-05
HSPG2	green	-0.4	4.5e-10	0.4	4.5e-10	0.2	0.003	-0.052	0.43	-0.45	9.6e-13	-0.094	0.16	0.37	5.6e-09	0.72	1.7e-37	-0.062	0.35	0.35	6e-08	0.1	0.13	-0.004	0.95
HTRA1	green	-0.55	4.4e-19	0.55	4.4e-19	0.15	0.02	-0.096	0.15	-0.54	1.8e-18	-0.1	0.13	0.57	3.3e-21	0.89	5.2e-77	-0.093	0.16	0.35	6.4e-08	0.25	0.00014	0.24	0.00024
HTRA3	green	-0.39	1.3e-09	0.39	1.3e-09	0.14	0.04	-0.1	0.12	-0.5	4.2e-16	-0.058	0.38	0.56	5.2e-20	0.82	8e-56	-0.16	0.016	0.35	5.3e-08	0.13	0.05	0.21	0.0012
ID3	green	-0.52	1.9e-17	0.52	1.9e-17	-0.019	0.77	-0.2	0.0023	-0.55	1.2e-19	0.12	0.071	0.51	2.1e-16	0.58	1.5e-21	0.061	0.36	0.37	7.2e-09	0.33	3.7e-07	0.28	2e-05
IGDCC4	green	-0.027	0.69	0.027	0.69	0.52	1.8e-17	0.059	0.38	-0.13	0.055	-0.44	5.8e-12	0.067	0.31	0.64	3.6e-28	0.041	0.54	0.17	0.0096	-0.033	0.62	-0.19	0.0041
IGFBP4	green	-0.29	9e-06	0.29	9e-06	0.29	8.4e-06	0.098	0.14	-0.26	7.1e-05	-0.35	5.8e-08	0.12	0.065	0.62	9.4e-26	0.13	0.044	0.32	1.2e-06	0.088	0.18	-0.19	0.0031
IGFBP7	green	-0.52	5.8e-17	0.52	5.8e-17	0.091	0.17	-0.2	0.0019	-0.72	3.4e-37	0.02	0.77	0.58	3.3e-22	0.89	2.9e-77	0.22	0.00084	0.63	1.9e-26	0.38	4.3e-09	0.075	0.26
IL1R1	green	-0.3	3.6e-06	0.3	3.6e-06	0.074	0.27	-0.093	0.16	-0.38	2.1e-09	-0.14	0.037	0.45	6.3e-13	0.75	6.3e-43	0.049	0.46	0.48	1.2e-14	0.2	0.0022	0.18	0.0071
ISLR	green	-0.15	0.026	0.15	0.026	0.34	2.1e-07	0.027	0.69	-0.28	2.4e-05	-0.28	1.3e-05	0.19	0.0045	0.79	6.4e-49	0.018	0.79	0.25	0.00014	-0.019	0.78	-0.19	0.0032
ITGA1	green	-0.47	4.4e-14	0.47	4.4e-14	-0.001	0.99	-0.25	0.0001	-0.7	2.6e-35	0.22	0.00095	0.63	2e-26	0.75	2.2e-42	0.14	0.03	0.57	6.2e-21	0.36	1.6e-08	0.16	0.014
ITGBL1	green	-0.088	0.18	0.088	0.18	0.23	0.00049	0.065	0.33	-0.12	0.07	-0.32	8.3e-07	0.009	0.89	0.58	5.1e-22	0.066	0.32	0.18	0.0076	-0.056	0.4	-0.19	0.0037
JCAD	green	-0.26	9.6e-05	0.26	9.6e-05	0.19	0.0043	-0.002	0.98	-0.41	1.2e-10	-0.19	0.0045	0.39	9.6e-10	0.85	8.2e-64	-0.051	0.44	0.35	8.3e-08	0.028	0.67	7.3e-05	1
KANK4	green	-0.26	9.7e-05	0.26	9.7e-05	0.087	0.19	-0.1	0.12	-0.5	4.1e-16	0.098	0.14	0.64	1.4e-27	0.63	7.3e-27	-0.21	0.0017	0.26	8.5e-05	0.15	0.02	0.3	4.2e-06
KCNE4	green	-0.47	6.5e-14	0.47	6.5e-14	0.02	0.76	-0.24	0.00023	-0.62	1.6e-25	0.037	0.58	0.65	3.6e-29	0.84	1.3e-60	0.021	0.75	0.49	5.9e-15	0.3	4.3e-06	0.29	6.6e-06
KCNJ8	green	-0.4	5e-10	0.4	5e-10	0.36	2e-08	-0.13	0.051	-0.46	4.2e-13	-0.18	0.0062	0.4	5e-10	0.73	1.5e-38	0.027	0.68	0.36	1.8e-08	0.14	0.03	0.065	0.33
KDELR3	green	-0.31	1.6e-06	0.31	1.6e-06	0.076	0.25	0.33	2.3e-07	-0.51	1.5e-16	0.024	0.72	0.52	2.8e-17	0.71	1.2e-36	-0.17	0.009	0.25	0.00019	0.042	0.53	0.071	0.29
LAMA2	green	-0.13	0.056	0.13	0.056	0.54	7.4e-19	0.19	0.0044	-0.11	0.098	-0.43	8.8e-12	0.085	0.2	0.62	2.2e-25	-0.13	0.059	0.03	0.65	-0.18	0.0077	-0.14	0.032
LAMB1	green	-0.66	1.6e-29	0.66	1.6e-29	-0.013	0.85	-0.19	0.0044	-0.72	3.5e-38	0.16	0.016	0.72	3.8e-38	0.84	1.2e-60	-0.059	0.37	0.5	8.8e-16	0.35	4.1e-08	0.34	2.2e-07
LAMB2	green	0.063	0.35	-0.063	0.35	0.48	9.5e-15	0.18	0.0067	0.078	0.24	-0.62	4.3e-26	-0.11	0.098	0.5	6.6e-16	-0.052	0.44	-0.027	0.68	-0.21	0.0013	-0.25	0.00011
LAMC1	green	-0.57	1.9e-21	0.57	1.9e-21	0.11	0.11	-0.17	0.012	-0.74	4.1e-40	0.17	0.0086	0.74	4.9e-41	0.86	1.7e-66	-0.14	0.038	0.46	4.4e-13	0.26	6.8e-05	0.27	3e-05
LAMP5	green	-0.46	3e-13	0.46	3e-13	-0.14	0.031	-0.24	0.00032	-0.62	3.9e-25	0.17	0.0095	0.62	3.2e-25	0.67	9.5e-31	0.15	0.026	0.48	2.4e-14	0.41	1.2e-10	0.28	1.7e-05
LARP6	green	-0.43	7.1e-12	0.43	7.1e-12	0.077	0.25	-0.036	0.59	-0.65	1.4e-28	0.22	0.0011	0.67	4e-31	0.67	5.2e-31	-0.16	0.019	0.38	4.4e-09	0.24	0.00031	0.21	0.0018
LGALS1	green	-0.58	4.9e-22	0.58	4.9e-22	0.0026	0.97	-0.24	0.00024	-0.83	6.6e-59	0.29	6.1e-06	0.75	1.3e-42	0.84	1.8e-62	0.049	0.46	0.61	1.2e-24	0.39	1.1e-09	0.21	0.0011
LHFPL2	green	-0.59	7.8e-23	0.59	7.8e-23	-0.083	0.21	-0.25	0.0001	-0.73	7.5e-40	0.21	0.0018	0.63	1.9e-26	0.76	1.9e-43	0.25	0.00016	0.77	3.6e-45	0.53	7.1e-18	0.2	0.0021
LHFPL6	green	0.011	0.87	-0.011	0.87	0.48	8.9e-15	0.16	0.017	-0.09	0.18	-0.52	5.5e-17	0.063	0.35	0.63	1.8e-26	0.038	0.57	0.098	0.14	-0.07	0.3	-0.21	0.0012
LOX	green	-0.65	5.5e-29	0.65	5.5e-29	-0.22	0.001	-0.32	5.6e-07	-0.59	1.8e-22	0.34	1.5e-07	0.63	9.7e-27	0.62	2.6e-25	-0.04	0.55	0.41	7.8e-11	0.42	4.8e-11	0.44	2.1e-12
LOXL1	green	-0.35	8e-08	0.35	8e-08	0.095	0.15	-0.065	0.33	-0.5	1.4e-15	-0.047	0.48	0.3	2.8e-06	0.82	1.2e-55	0.21	0.0012	0.48	1.1e-14	0.19	0.0042	-0.18	0.0055
LRRC15	green	-0.63	3.6e-26	0.63	3.6e-26	-0.11	0.11	-0.32	6.1e-07	-0.6	9.1e-24	0.09	0.17	0.58	6e-22	0.84	1e-61	0.12	0.079	0.53	5.8e-18	0.4	5e-10	0.31	1.6e-06
LRRC17	green	-0.13	0.055	0.13	0.055	0.32	7.5e-07	0.044	0.51	-0.21	0.0018	-0.27	2.8e-05	0.22	0.0008	0.75	7.6e-42	-0.12	0.081	0.13	0.058	-0.045	0.5	-0.062	0.35
LRRC32	green	-0.22	0.00074	0.22	0.00074	0.38	4e-09	0.082	0.22	-0.33	2.9e-07	-0.37	1.3e-08	0.31	1.5e-06	0.74	4.6e-40	-0.04	0.55	0.3	5.6e-06	0.057	0.39	-0.042	0.53
LTBP2	green	-0.38	2.2e-09	0.38	2.2e-09	0.29	7.4e-06	-0.054	0.41	-0.46	2.6e-13	-0.19	0.0039	0.44	3.5e-12	0.77	6.5e-46	-0.053	0.43	0.32	6.6e-07	0.17	0.012	0.11	0.1
LUM	green	-0.71	6.2e-36	0.71	6.2e-36	-0.063	0.35	-0.29	1.1e-05	-0.72	1.9e-38	0.18	0.0061	0.61	2.7e-24	0.83	2.1e-58	0.18	0.006	0.58	3.7e-22	0.41	8.6e-11	0.23	0.00049
MAGED1	green	-0.33	2.4e-07	0.33	2.4e-07	0.13	0.049	0.24	0.00023	-0.46	3.8e-13	-0.06	0.37	0.34	2e-07	0.69	7.4e-34	-0.015	0.82	0.24	0.00022	0.023	0.73	-0.13	0.048
MAGED4B	green	-0.5	5.8e-16	0.5	5.8e-16	-0.095	0.15	-0.06	0.37	-0.59	2.1e-22	0.21	0.0012	0.53	1.1e-17	0.72	8.4e-38	-0.056	0.4	0.35	7.1e-08	0.16	0.019	0.12	0.083
MAGEH1	green	-0.018	0.78	0.018	0.78	0.29	7.6e-06	0.25	0.00016	-0.14	0.033	-0.46	1.8e-13	-0.1	0.13	0.57	6.4e-21	0.35	6.3e-08	0.26	5.5e-05	-0.093	0.16	-0.46	2.6e-13
MAP1B	green	-0.2	0.0028	0.2	0.0028	0.31	1.6e-06	0.16	0.014	-0.33	2.2e-07	-0.23	0.00054	0.3	3.5e-06	0.68	7e-33	-0.16	0.019	0.18	0.0063	-0.097	0.14	-0.062	0.36
MCAM	green	-0.52	3.5e-17	0.52	3.5e-17	0.065	0.33	-0.17	0.011	-0.57	1.9e-21	0.069	0.3	0.64	3.4e-28	0.63	4.1e-26	-0.19	0.0046	0.32	7e-07	0.22	0.0008	0.38	4e-09
MFAP2	green	-0.67	1.4e-31	0.67	1.4e-31	-0.11	0.086	-0.3	4e-06	-0.75	7.9e-42	0.34	1.7e-07	0.81	3.7e-53	0.82	1.1e-56	-0.086	0.2	0.51	1.5e-16	0.42	6.2e-11	0.42	4.7e-11
MME	green	-0.31	2.5e-06	0.31	2.5e-06	0.057	0.39	-0.15	0.02	-0.51	1.1e-16	-0.0031	0.96	0.55	2.4e-19	0.73	9.5e-39	0.047	0.48	0.51	9.5e-17	0.23	0.0006	0.22	0.00087
MMP11	green	-0.4	4.7e-10	0.4	4.7e-10	-0.11	0.095	-0.24	0.00034	-0.52	3e-17	0.22	0.00072	0.52	2.4e-17	0.67	1.5e-31	-0.069	0.3	0.36	2.3e-08	0.24	0.00032	0.2	0.002
MMP14	green	-0.39	8.6e-10	0.39	8.6e-10	-0.084	0.2	-0.19	0.0034	-0.49	3.7e-15	0.14	0.034	0.59	3.4e-23	0.59	1.5e-22	-0.096	0.15	0.42	5.9e-11	0.26	5.1e-05	0.34	2.2e-07
MMP7	green	-0.3	3.5e-06	0.3	3.5e-06	-0.046	0.49	0.081	0.23	-0.5	4.9e-16	0.12	0.065	0.47	1e-13	0.61	5.6e-25	0.087	0.19	0.5	5.9e-16	0.23	0.00044	0.063	0.35
MPDZ	green	-0.027	0.68	0.027	0.68	0.52	2.2e-17	0.23	0.00043	-0.15	0.028	-0.41	9.2e-11	0.052	0.44	0.63	2.5e-26	-0.061	0.36	0.11	0.097	-0.18	0.0054	-0.28	1.7e-05
MSC	green	-0.37	8.2e-09	0.37	8.2e-09	-0.044	0.51	-0.26	9.8e-05	-0.59	6.2e-23	0.2	0.0021	0.61	1.5e-24	0.57	2.1e-21	0.06	0.37	0.52	2.6e-17	0.34	1.4e-07	0.26	6.4e-05
MSC-AS1	green	-0.47	4.3e-14	0.47	4.3e-14	-0.051	0.44	-0.25	0.00018	-0.67	1.3e-31	0.23	0.00043	0.66	2.3e-29	0.7	8.2e-35	0.037	0.58	0.51	3.2e-16	0.32	7.2e-07	0.25	9.9e-05
MSRB3	green	-0.035	0.59	0.035	0.59	0.45	5.8e-13	0.19	0.004	-0.26	6.8e-05	-0.35	5.6e-08	0.3	5.1e-06	0.76	9.1e-45	-0.2	0.0022	0.13	0.046	-0.18	0.0059	-0.079	0.23
MXRA5	green	-0.31	1.2e-06	0.31	1.2e-06	0.21	0.0017	-0.12	0.067	-0.4	2.3e-10	-0.17	0.011	0.33	3.7e-07	0.85	1.2e-64	0.035	0.6	0.38	2.5e-09	0.16	0.017	-0.03	0.65
MXRA8	green	-0.31	1.9e-06	0.31	1.9e-06	0.33	4.1e-07	0.017	0.8	-0.37	1.3e-08	-0.31	1.4e-06	0.29	6e-06	0.84	2.2e-61	-0.02	0.77	0.27	3.5e-05	0.038	0.57	-0.056	0.4
MYH10	green	-0.36	2e-08	0.36	2e-08	0.086	0.2	-0.13	0.042	-0.43	6.9e-12	0.081	0.22	0.61	1.1e-24	0.59	7.8e-23	-0.27	3.1e-05	0.16	0.013	0.11	0.097	0.43	8.9e-12
MYL9	green	-0.22	0.0009	0.22	0.0009	0.28	2.3e-05	0.15	0.022	-0.36	2.4e-08	-0.24	0.00032	0.32	7e-07	0.76	7.3e-44	-0.11	0.091	0.25	0.00015	-0.067	0.31	-0.097	0.15
NAP1L3	green	0.027	0.69	-0.027	0.69	0.24	0.0003	0.16	0.017	-0.063	0.34	-0.36	2e-08	-0.07	0.3	0.56	1.6e-20	0.15	0.024	0.11	0.088	-0.16	0.017	-0.35	8.1e-08
NID1	green	-0.52	2.4e-17	0.52	2.4e-17	0.033	0.63	-0.18	0.0062	-0.63	3.1e-26	0.046	0.49	0.72	1.9e-37	0.83	2.8e-58	-0.11	0.1	0.43	1e-11	0.28	1.7e-05	0.37	6.7e-09
NID2	green	-0.63	4.1e-26	0.63	4.1e-26	-0.0055	0.93	-0.28	1.9e-05	-0.73	1.8e-38	0.16	0.014	0.73	4.1e-39	0.92	6.8e-97	-0.0022	0.97	0.59	2.5e-22	0.4	5e-10	0.31	1.5e-06
NNMT	green	-0.59	8.6e-23	0.59	8.6e-23	0.13	0.052	-0.26	6e-05	-0.76	2.4e-43	0.086	0.19	0.7	2.4e-35	0.85	3.1e-65	0.16	0.016	0.66	2.3e-29	0.46	4.5e-13	0.27	4.7e-05
NOX4	green	-0.57	1.9e-21	0.57	1.9e-21	-0.064	0.34	-0.26	6.1e-05	-0.71	5.7e-36	0.2	0.0028	0.69	4.2e-34	0.88	3e-73	0.077	0.25	0.6	1.4e-23	0.41	1.8e-10	0.27	2.7e-05
NPTX2	green	-0.37	5.9e-09	0.37	5.9e-09	0.054	0.42	-0.13	0.05	-0.53	5.2e-18	0.045	0.5	0.53	6.4e-18	0.71	1.1e-35	-0.045	0.5	0.39	7e-10	0.11	0.095	0.17	0.011
NREP	green	-0.61	2.7e-24	0.61	2.7e-24	0.0034	0.96	-0.27	3.9e-05	-0.63	3.9e-27	0.18	0.0079	0.65	1.6e-28	0.83	6.6e-60	-0.095	0.15	0.38	4.7e-09	0.3	3.8e-06	0.32	8e-07
NTM	green	-0.33	2.9e-07	0.33	2.9e-07	0.098	0.14	-0.019	0.78	-0.37	9.4e-09	-0.096	0.15	0.5	1.7e-15	0.79	4.2e-49	-0.3	3.4e-06	0.19	0.0048	0.035	0.6	0.24	0.00027
NUAK1	green	-0.44	3.2e-12	0.44	3.2e-12	0.21	0.0015	-0.074	0.26	-0.59	1.9e-22	0.032	0.63	0.5	3.9e-16	0.81	4.5e-55	-0.026	0.7	0.37	6.6e-09	0.23	0.00038	0.028	0.68
OLFML2B	green	-0.55	9.6e-20	0.55	9.6e-20	0.11	0.098	-0.27	3.8e-05	-0.63	1.5e-26	-0.039	0.56	0.51	9.5e-17	0.91	1.4e-87	0.22	0.00066	0.61	1.1e-24	0.39	1.7e-09	0.099	0.14
OLFML3	green	-0.15	0.021	0.15	0.021	0.36	2.2e-08	0.021	0.75	-0.24	0.00032	-0.38	4.9e-09	0.12	0.078	0.74	2e-40	0.15	0.023	0.32	5.7e-07	0.12	0.078	-0.21	0.0012
P3H1	green	-0.54	1.1e-18	0.54	1.1e-18	-0.072	0.28	-0.25	0.0001	-0.73	1.8e-39	0.19	0.0032	0.7	3.1e-35	0.89	1.5e-77	0.034	0.61	0.55	3e-19	0.33	2.3e-07	0.23	0.00059
P3H4	green	-0.58	1.8e-21	0.58	1.8e-21	-0.064	0.34	-0.16	0.015	-0.62	4e-25	0.19	0.0041	0.54	1.3e-18	0.73	3.6e-39	-0.049	0.46	0.4	2.4e-10	0.23	0.00042	0.16	0.014
PALLD	green	-0.24	0.00033	0.24	0.00033	0.089	0.18	-0.052	0.43	-0.27	5.1e-05	0.02	0.77	0.41	8.2e-11	0.59	4.7e-23	-0.35	6.8e-08	0.067	0.32	-0.077	0.25	0.24	0.00021
PALM2	green	-0.38	3.3e-09	0.38	3.3e-09	-0.014	0.83	-0.22	0.00071	-0.55	1.8e-19	0.22	0.001	0.6	2.6e-23	0.61	1.2e-24	-0.11	0.1	0.37	1.1e-08	0.13	0.044	0.25	0.00013
PAM	green	-0.37	1.2e-08	0.37	1.2e-08	0.26	5.6e-05	0.25	0.00012	-0.39	1.8e-09	-0.27	2.9e-05	0.35	7.1e-08	0.74	1.2e-40	-0.091	0.17	0.17	0.0091	0.062	0.35	0.031	0.64
PCDH18	green	-0.065	0.33	0.065	0.33	0.44	4.2e-12	0.15	0.02	-0.044	0.5	-0.5	4.2e-16	0.097	0.14	0.58	5.7e-22	-0.16	0.016	-0.035	0.6	-0.16	0.019	-0.054	0.42
PCOLCE	green	-0.35	6e-08	0.35	6e-08	0.19	0.0041	-0.13	0.054	-0.43	7.2e-12	-0.23	0.00047	0.35	3.6e-08	0.88	8.3e-77	0.14	0.033	0.43	8.1e-12	0.17	0.0084	-0.026	0.7
PDGFRB	green	-0.54	5.3e-19	0.54	5.3e-19	0.16	0.018	-0.22	0.00071	-0.63	1.7e-26	-0.057	0.39	0.56	4.1e-20	0.92	1.1e-96	0.08	0.23	0.5	1.4e-15	0.27	2.7e-05	0.14	0.041
PDGFRL	green	0.15	0.022	-0.15	0.022	0.46	2.9e-13	0.3	5.2e-06	0.095	0.15	-0.54	2.6e-18	-0.12	0.068	0.55	1.7e-19	-0.11	0.11	-0.039	0.56	-0.26	6.9e-05	-0.31	2.6e-06
PDIA5	green	-0.48	1.8e-14	0.48	1.8e-14	-0.064	0.33	0.062	0.35	-0.71	1.8e-36	0.23	0.00061	0.59	7.2e-23	0.67	1.1e-30	0.086	0.19	0.49	7e-15	0.29	9.9e-06	0.1	0.12
PGM2L1	green	-0.46	3.6e-13	0.46	3.6e-13	0.08	0.23	-0.17	0.013	-0.68	8.4e-32	0.11	0.11	0.61	1.1e-24	0.75	2.9e-42	0.089	0.18	0.48	1.3e-14	0.25	0.00012	0.13	0.054
PKIG	green	-0.077	0.25	0.077	0.25	0.38	2.4e-09	0.071	0.29	-0.37	1.3e-08	-0.28	1.6e-05	0.17	0.0099	0.64	1.1e-27	0.32	6.9e-07	0.41	8.8e-11	0.018	0.78	-0.31	1.4e-06
PLOD3	green	-0.61	7.9e-25	0.61	7.9e-25	-0.031	0.64	-0.23	0.00058	-0.78	1.3e-48	0.26	6.4e-05	0.69	9.8e-34	0.75	2.6e-42	0.073	0.27	0.59	1.5e-22	0.4	5.8e-10	0.22	0.00068
PLPP4	green	-0.41	1.2e-10	0.41	1.2e-10	-0.065	0.33	-0.19	0.0035	-0.56	7.1e-20	0.17	0.0083	0.56	3.9e-20	0.81	9.8e-55	-0.056	0.4	0.4	5.5e-10	0.17	0.0094	0.16	0.014
PLXDC1	green	-0.27	2.9e-05	0.27	2.9e-05	0.3	3.6e-06	-0.16	0.018	-0.33	4.1e-07	-0.31	1.2e-06	0.27	2.7e-05	0.68	1.8e-32	0.19	0.0044	0.31	1.6e-06	0.19	0.0043	0.0016	0.98
PNMA1	green	-0.42	2.4e-11	0.42	2.4e-11	-0.12	0.063	-0.22	0.00071	-0.6	6.9e-24	0.31	1.7e-06	0.61	8.2e-25	0.57	1.2e-20	0.073	0.27	0.45	9.7e-13	0.28	1.6e-05	0.26	9.2e-05
POGLUT2	green	-0.56	6.9e-20	0.56	6.9e-20	-0.058	0.39	-0.16	0.015	-0.65	9.8e-29	0.22	0.001	0.7	7.9e-35	0.8	1.8e-52	-0.14	0.031	0.4	4.9e-10	0.26	5.2e-05	0.33	4.4e-07
POSTN	green	-0.64	1.5e-27	0.64	1.5e-27	-0.044	0.51	-0.26	9.6e-05	-0.69	9.9e-34	0.23	0.00046	0.68	4.4e-32	0.89	3.8e-81	-0.031	0.64	0.53	1e-17	0.36	1.5e-08	0.28	1.7e-05
PPEF1	green	-0.28	1.8e-05	0.28	1.8e-05	-0.041	0.54	-0.18	0.0062	-0.48	1.4e-14	0.16	0.018	0.53	8.6e-18	0.62	2.2e-25	-0.081	0.22	0.32	1e-06	0.17	0.011	0.2	0.0024
PRICKLE1	green	-0.25	0.00013	0.25	0.00013	0.2	0.0022	-0.008	0.9	-0.33	3.9e-07	-0.21	0.0014	0.35	8.8e-08	0.74	4.7e-40	-0.016	0.81	0.22	0.00066	0.087	0.19	0.067	0.31
PRR16	green	-0.47	1.1e-13	0.47	1.1e-13	0.1	0.12	-0.27	4.1e-05	-0.6	2.6e-23	0.11	0.097	0.57	3.7e-21	0.71	2.6e-36	0.1	0.13	0.58	1.5e-21	0.4	4.8e-10	0.2	0.0026
PRRX1	green	-0.26	7.4e-05	0.26	7.4e-05	0.19	0.0047	-0.04	0.55	-0.41	1e-10	-0.16	0.014	0.24	0.0002	0.78	1.3e-47	0.17	0.01	0.38	3.2e-09	0.16	0.019	-0.19	0.0043
PRSS23	green	-0.48	9e-15	0.48	9e-15	0.027	0.68	-0.015	0.82	-0.57	9.8e-21	0.014	0.84	0.74	1.5e-40	0.71	6e-36	-0.22	0.00074	0.32	1.1e-06	0.26	8.4e-05	0.47	1.2e-13
PTPRG	green	-0.41	8e-11	0.41	8e-11	0.04	0.55	-0.18	0.0059	-0.52	2.5e-17	0.035	0.6	0.61	2.3e-24	0.74	5e-41	-0.14	0.034	0.38	2.7e-09	0.23	0.00058	0.3	4.5e-06
PTPRM	green	-0.013	0.85	0.013	0.85	0.49	4.8e-15	0.099	0.14	-0.22	0.00098	-0.43	1.6e-11	0.065	0.33	0.63	1.9e-26	0.095	0.15	0.2	0.0025	-0.12	0.083	-0.29	8e-06
PXDN	green	-0.65	1.2e-28	0.65	1.2e-28	0.028	0.67	-0.24	0.00021	-0.75	3.8e-42	0.18	0.0057	0.75	6.7e-43	0.88	2.8e-75	-0.019	0.78	0.55	1.4e-19	0.35	6.6e-08	0.31	1.4e-06
RAB23	green	-0.49	2.3e-15	0.49	2.3e-15	0.064	0.34	-0.18	0.0061	-0.64	8.1e-28	0.21	0.0012	0.67	4.1e-31	0.8	8.6e-52	-0.16	0.014	0.39	1.5e-09	0.25	0.00011	0.26	6.4e-05
RABAC1	green	-0.23	0.00039	0.23	0.00039	0.064	0.34	0.25	0.00015	-0.42	4.9e-11	-0.2	0.0021	0.36	1.6e-08	0.63	3.7e-26	0.14	0.041	0.31	2e-06	0.095	0.15	-0.029	0.67
RAI14	green	-0.52	3.1e-17	0.52	3.1e-17	-0.12	0.06	-0.17	0.011	-0.76	5.3e-45	0.33	4.9e-07	0.68	4.5e-32	0.76	3.6e-44	0.028	0.67	0.58	7.1e-22	0.35	8.6e-08	0.13	0.046
RARRES2	green	-0.2	0.003	0.2	0.003	0.11	0.085	-0.047	0.48	-0.37	1.3e-08	-0.2	0.0031	0.16	0.018	0.7	1.6e-34	0.41	9.2e-11	0.51	3e-16	0.17	0.011	-0.25	0.00015
RASSF5	green	0.46	2.1e-13	-0.46	2.1e-13	-0.12	0.075	0.11	0.11	0.56	1.7e-20	-0.22	0.00093	-0.71	2.9e-36	-0.65	1.8e-28	0.4	2.9e-10	-0.17	0.0085	-0.17	0.012	-0.45	1.4e-12
RCN1	green	-0.45	1.3e-12	0.45	1.3e-12	0.056	0.4	0.063	0.34	-0.62	2.9e-25	0.073	0.28	0.39	7.2e-10	0.69	4.8e-33	0.14	0.036	0.49	2.3e-15	0.34	1.8e-07	-0.11	0.089
RCN3	green	-0.49	5.8e-15	0.49	5.8e-15	0.066	0.32	-0.19	0.0049	-0.63	1.9e-26	0.037	0.58	0.64	3.8e-27	0.92	6.1e-94	-0.034	0.61	0.47	5.4e-14	0.23	0.0005	0.2	0.0026
RFLNB	green	-0.47	6.7e-14	0.47	6.7e-14	-0.047	0.48	-0.24	0.00033	-0.71	8.4e-36	0.18	0.0055	0.62	1.9e-25	0.71	1.1e-36	0.24	0.00022	0.58	5.2e-22	0.3	4.4e-06	0.15	0.022
RGS4	green	-0.44	3e-12	0.44	3e-12	-0.028	0.67	-0.2	0.0023	-0.6	1.7e-23	0.26	8.8e-05	0.67	5.8e-31	0.7	1.9e-35	-0.072	0.28	0.41	8e-11	0.26	5.4e-05	0.29	6.1e-06
RHOBTB1	green	-0.37	1.1e-08	0.37	1.1e-08	0.25	0.00011	-0.16	0.016	-0.54	7e-19	0.018	0.78	0.55	4.3e-19	0.83	1.9e-60	-0.12	0.079	0.32	6.5e-07	0.14	0.031	0.15	0.025
RHOBTB3	green	-0.3	4.1e-06	0.3	4.1e-06	0.22	0.00072	0.22	0.00092	-0.44	2e-12	-0.061	0.36	0.4	3e-10	0.74	3.5e-40	-0.13	0.05	0.28	2.5e-05	0.057	0.39	-0.036	0.59
RHOQ	green	-0.28	2.2e-05	0.28	2.2e-05	0.28	2.5e-05	0.019	0.77	-0.54	1.3e-18	-0.17	0.012	0.37	5.4e-09	0.72	1.9e-38	0.25	0.00011	0.52	2.7e-17	0.12	0.071	-0.093	0.16
SALL4	green	-0.37	1.3e-08	0.37	1.3e-08	-0.12	0.069	-0.2	0.0027	-0.54	1.2e-18	0.28	1.9e-05	0.55	9.2e-20	0.63	5.6e-27	-0.17	0.0099	0.23	0.00036	0.11	0.094	0.2	0.0026
SATB2	green	-0.45	7e-13	0.45	7e-13	0.036	0.58	-0.23	0.00035	-0.46	3.5e-13	-0.026	0.7	0.47	3.5e-14	0.74	2.5e-40	-0.059	0.37	0.29	7.9e-06	0.15	0.025	0.24	0.00031
SCG2	green	-0.35	8.1e-08	0.35	8.1e-08	0.2	0.003	-0.076	0.26	-0.38	2.5e-09	-0.2	0.0026	0.37	9.7e-09	0.67	2.2e-31	0.042	0.52	0.35	3.8e-08	0.096	0.15	0.078	0.24
SDC2	green	-0.26	6.7e-05	0.26	6.7e-05	0.27	3.7e-05	0.04	0.55	-0.47	1.1e-13	-0.076	0.25	0.44	2.5e-12	0.82	1.9e-57	-0.17	0.012	0.31	2.6e-06	-0.03	0.66	-0.0077	0.91
SDK1	green	-0.39	7.1e-10	0.39	7.1e-10	-0.0055	0.93	-0.26	9.2e-05	-0.49	2.3e-15	0.1	0.11	0.31	1.5e-06	0.59	1.6e-22	0.22	0.00076	0.47	3.8e-14	0.3	4.3e-06	-0.067	0.31
SELENOM	green	-0.29	9.3e-06	0.29	9.3e-06	0.095	0.15	0.21	0.0018	-0.5	6.4e-16	-0.13	0.044	0.25	0.00016	0.65	2.8e-28	0.31	2.6e-06	0.45	7.2e-13	0.19	0.0049	-0.25	0.00011
SEPTIN11	green	-0.39	1.2e-09	0.39	1.2e-09	0.043	0.52	-0.18	0.0066	-0.59	4.8e-23	0.12	0.079	0.49	3.4e-15	0.83	8.7e-60	0.087	0.19	0.42	2.5e-11	0.18	0.0057	0.034	0.61
SERPINF1	green	-0.3	4.6e-06	0.3	4.6e-06	0.33	4.1e-07	-0.0043	0.95	-0.41	1.9e-10	-0.25	0.00018	0.11	0.11	0.69	3.2e-34	0.4	2.9e-10	0.48	1.1e-14	0.23	0.00039	-0.32	1e-06
SERPINH1	green	-0.74	8.2e-41	0.74	8.2e-41	-0.1	0.12	-0.36	2.5e-08	-0.84	6.1e-61	0.35	5.3e-08	0.84	1.5e-62	0.84	2.8e-62	-0.0092	0.89	0.59	6e-23	0.5	1.4e-15	0.43	7.8e-12
SFRP2	green	-0.28	1.4e-05	0.28	1.4e-05	0.26	8.4e-05	0.047	0.48	-0.26	7.2e-05	-0.26	7.4e-05	0.28	1.7e-05	0.78	2e-48	-0.073	0.27	0.23	0.00039	0.025	0.71	-0.0085	0.9
SFRP4	green	-0.36	1.5e-08	0.36	1.5e-08	0.095	0.15	-0.1	0.12	-0.43	1.1e-11	-0.11	0.091	0.36	1.8e-08	0.78	4.1e-48	0.089	0.18	0.43	7.3e-12	0.22	0.0011	0.046	0.49
SGCB	green	-0.33	2.9e-07	0.33	2.9e-07	0.38	2.5e-09	-0.048	0.47	-0.52	4.4e-17	0.0055	0.93	0.55	1.1e-19	0.75	9.1e-43	-0.18	0.0075	0.31	2.5e-06	0.1	0.12	0.16	0.018
SGCE	green	0.032	0.63	-0.032	0.63	0.44	2.7e-12	0.32	8.2e-07	-0.18	0.0074	-0.31	1.4e-06	0.13	0.043	0.59	3.9e-23	-0.066	0.32	0.11	0.092	-0.15	0.02	-0.25	0.00016
SGIP1	green	-0.4	5.9e-10	0.4	5.9e-10	-0.004	0.95	-0.21	0.0018	-0.54	8.8e-19	0.042	0.53	0.56	1.8e-20	0.76	1.7e-44	0.012	0.86	0.46	3.7e-13	0.28	1.4e-05	0.23	0.00062
SH3RF3	green	-0.28	1.6e-05	0.28	1.6e-05	0.26	8.1e-05	-0.098	0.14	-0.37	7.9e-09	-0.28	1.4e-05	0.44	2e-12	0.77	1e-46	-0.035	0.6	0.33	3e-07	0.12	0.068	0.18	0.0054
SHOX2	green	-0.51	2.8e-16	0.51	2.8e-16	-0.13	0.047	-0.31	2.7e-06	-0.58	3.1e-22	0.33	5e-07	0.48	2.8e-14	0.62	1.9e-25	0.05	0.45	0.46	4e-13	0.34	1.7e-07	0.15	0.023
SMYD3	green	-0.42	5.2e-11	0.42	5.2e-11	-0.0076	0.91	-0.1	0.13	-0.63	2.1e-26	0.24	0.00026	0.62	7.2e-26	0.74	8e-41	-0.09	0.17	0.38	2.6e-09	0.17	0.011	0.17	0.0093
SORCS2	green	-0.43	7.5e-12	0.43	7.5e-12	0.013	0.85	-0.23	0.00058	-0.47	8.9e-14	-0.025	0.71	0.64	2.2e-27	0.64	1.2e-27	-0.11	0.087	0.34	1.3e-07	0.32	8e-07	0.45	4.8e-13
SOX11	green	-0.38	2.3e-09	0.38	2.3e-09	0.062	0.35	-0.25	0.00015	-0.53	1.3e-17	0.16	0.014	0.56	2.4e-20	0.75	1.3e-41	-0.12	0.076	0.31	1.9e-06	0.14	0.032	0.22	0.0009
SPARC	green	-0.57	3.6e-21	0.57	3.6e-21	0.086	0.2	-0.2	0.0019	-0.61	7.7e-25	0.02	0.77	0.56	2.3e-20	0.94	1e-103	-0.0023	0.97	0.46	1.3e-13	0.28	2.4e-05	0.17	0.012
SPOCK1	green	-0.24	0.00029	0.24	0.00029	0.22	0.00067	-0.029	0.66	-0.45	7.2e-13	-0.041	0.54	0.6	2e-23	0.75	1.3e-41	-0.27	2.5e-05	0.22	0.0011	-0.021	0.75	0.22	0.00073
SPON1	green	-0.39	9.2e-10	0.39	9.2e-10	0.13	0.043	0.0057	0.93	-0.34	1.2e-07	-0.24	0.0002	0.4	3.5e-10	0.76	1.5e-43	-0.065	0.32	0.3	3.4e-06	0.13	0.057	0.18	0.0054
SPON2	green	-0.3	5.4e-06	0.3	5.4e-06	0.2	0.0024	-0.087	0.19	-0.3	2.9e-06	-0.18	0.006	0.52	2.5e-17	0.73	6.4e-40	-0.34	2.1e-07	0.12	0.062	0.027	0.69	0.33	4.1e-07
STEAP1	green	-0.51	1.3e-16	0.51	1.3e-16	-0.15	0.021	-0.075	0.26	-0.56	6.2e-20	0.26	9.1e-05	0.59	2.1e-22	0.56	1.8e-20	-0.044	0.51	0.42	4.6e-11	0.24	0.0002	0.27	4.3e-05
STYK1	green	0.44	2.1e-12	-0.44	2.1e-12	-0.13	0.042	0.31	1.9e-06	0.65	6.7e-29	-0.16	0.015	-0.53	3.7e-18	-0.63	5.5e-27	-0.098	0.14	-0.41	1.5e-10	-0.26	6.1e-05	-0.17	0.012
SULF1	green	-0.57	1.1e-20	0.57	1.1e-20	0.012	0.86	-0.23	0.00038	-0.73	7.5e-39	0.24	0.00025	0.66	2.9e-30	0.88	7.1e-74	0.041	0.54	0.59	8.5e-23	0.32	7.2e-07	0.17	0.0088
SULF2	green	-0.35	6.8e-08	0.35	6.8e-08	0.062	0.35	-0.29	7e-06	-0.44	4.9e-12	0.02	0.77	0.61	1.5e-24	0.66	3.5e-30	-0.1	0.12	0.3	5.1e-06	0.24	0.00022	0.41	1.8e-10
SYNDIG1	green	-0.2	0.0023	0.2	0.0023	0.039	0.56	-0.09	0.17	-0.32	7.8e-07	-0.027	0.69	0.18	0.0054	0.6	2e-23	0.14	0.032	0.29	9.6e-06	0.053	0.42	-0.14	0.03
SYTL2	green	-0.29	8.7e-06	0.29	8.7e-06	0.13	0.057	0.087	0.19	-0.38	3e-09	-0.24	0.00021	0.22	0.00063	0.69	3.1e-33	0.29	6.2e-06	0.47	8.8e-14	0.25	0.0001	-0.16	0.019
TAGLN	green	-0.21	0.0018	0.21	0.0018	0.25	0.00016	0.18	0.0056	-0.42	4.8e-11	-0.22	0.00078	0.39	1.5e-09	0.81	1.4e-53	-0.048	0.47	0.31	2.1e-06	-0.02	0.77	-0.072	0.28
TCEAL9	green	-0.51	3.5e-16	0.51	3.5e-16	-0.11	0.1	-0.11	0.095	-0.5	4.5e-16	0.22	0.00062	0.59	2.2e-22	0.55	9.3e-20	-0.19	0.0032	0.27	3.6e-05	0.22	0.00062	0.35	6.7e-08
TCF4	green	-0.18	0.0052	0.18	0.0052	0.28	1.3e-05	-0.014	0.83	-0.31	2.5e-06	-0.31	2e-06	0.042	0.53	0.65	2.8e-29	0.37	1.1e-08	0.34	1.6e-07	0.086	0.19	-0.32	5.5e-07
TDO2	green	-0.54	1.5e-18	0.54	1.5e-18	-0.17	0.0097	-0.31	2.5e-06	-0.68	7e-32	0.38	3.1e-09	0.66	3.3e-30	0.58	3e-22	0.15	0.029	0.58	8.9e-22	0.5	6.6e-16	0.31	1.6e-06
TGFB1I1	green	-0.35	8.1e-08	0.35	8.1e-08	0.23	0.00052	-0.0045	0.95	-0.5	5.4e-16	-0.14	0.029	0.5	7.3e-16	0.88	9.2e-74	-0.083	0.21	0.34	1.5e-07	0.063	0.35	0.066	0.32
THBS2	green	-0.56	1.3e-20	0.56	1.3e-20	0.085	0.2	-0.23	0.00061	-0.56	2.3e-20	-0.028	0.67	0.6	2.3e-23	0.88	1.7e-73	-0.082	0.22	0.43	1.4e-11	0.27	4.4e-05	0.31	1.8e-06
THY1	green	-0.64	1.2e-27	0.64	1.2e-27	-0.048	0.47	-0.38	4.9e-09	-0.72	3.1e-37	0.15	0.022	0.59	1.8e-22	0.89	2.7e-78	0.19	0.0035	0.61	1.2e-24	0.39	1.6e-09	0.16	0.019
TIMP1	green	-0.45	1.5e-12	0.45	1.5e-12	0.096	0.15	0.088	0.18	-0.67	1.3e-31	0.033	0.62	0.49	4.6e-15	0.74	3.9e-40	0.27	4.6e-05	0.67	4e-31	0.34	2.1e-07	-0.071	0.29
TIMP2	green	0.0051	0.94	-0.0051	0.94	0.35	5.4e-08	0.066	0.32	-0.094	0.16	-0.46	4.1e-13	0.081	0.22	0.72	7.4e-38	0.035	0.6	0.25	0.00013	-0.11	0.084	-0.22	0.001
TMEM119	green	-0.23	0.00047	0.23	0.00047	0.042	0.53	-0.13	0.059	-0.32	1.1e-06	-0.19	0.0043	0.11	0.09	0.66	1.6e-29	0.38	2.2e-09	0.45	1.6e-12	0.15	0.027	-0.21	0.0012
TMEM263	green	-0.41	1.3e-10	0.41	1.3e-10	0.026	0.7	0.19	0.0049	-0.67	1.5e-30	0.12	0.081	0.48	1.7e-14	0.71	2.8e-36	0.21	0.0016	0.49	2.2e-15	0.27	3.3e-05	-0.09	0.17
TMEM47	green	0.22	0.00089	-0.22	0.00089	0.55	8.1e-20	0.37	8.4e-09	0.084	0.21	-0.62	1.6e-25	-0.12	0.066	0.52	3.5e-17	-0.076	0.25	-0.039	0.56	-0.35	8.7e-08	-0.37	1.2e-08
TNFAIP6	green	-0.65	3.2e-28	0.65	3.2e-28	-0.015	0.82	-0.3	3.2e-06	-0.8	1.2e-52	0.28	2e-05	0.82	1.7e-56	0.83	9.8e-60	-0.02	0.76	0.67	5.1e-31	0.49	5e-15	0.38	3.4e-09
TPM1	green	-0.15	0.022	0.15	0.022	0.56	4.5e-20	0.097	0.15	-0.41	1.4e-10	-0.15	0.021	0.46	3.4e-13	0.73	4.4e-39	-0.19	0.0036	0.25	0.00012	0.043	0.52	0.048	0.47
TPST1	green	-0.58	1.7e-21	0.58	1.7e-21	-0.11	0.11	-0.23	0.00041	-0.68	8.4e-33	0.32	1.1e-06	0.74	1.4e-41	0.75	2.1e-42	-0.074	0.26	0.48	1.6e-14	0.37	1.2e-08	0.36	1.9e-08
TSHZ3	green	-0.52	2.2e-17	0.52	2.2e-17	0.036	0.59	-0.19	0.0049	-0.65	3.3e-29	0.13	0.047	0.75	4.4e-42	0.85	3e-65	-0.16	0.015	0.45	1.5e-12	0.29	6.8e-06	0.34	9.6e-08
TSPAN4	green	-0.27	4.1e-05	0.27	4.1e-05	0.16	0.013	-0.096	0.15	-0.41	1.7e-10	-0.15	0.02	0.29	6.6e-06	0.61	1.4e-24	0.22	0.00065	0.45	7.4e-13	0.27	4.2e-05	-0.054	0.41
TUBA1A	green	-0.13	0.048	0.13	0.048	0.35	5.8e-08	-0.01	0.88	-0.32	1e-06	-0.29	1.1e-05	0.24	0.0003	0.75	2.8e-42	0.042	0.53	0.27	3.9e-05	-0.047	0.48	-0.15	0.023
TWIST1	green	-0.18	0.0056	0.18	0.0056	0.15	0.024	-0.014	0.83	-0.28	2.2e-05	-0.25	0.00012	0.37	6.6e-09	0.76	8.7e-44	-0.12	0.061	0.28	2e-05	0.047	0.48	0.095	0.15
TWSG1	green	-0.55	3.9e-19	0.55	3.9e-19	-0.11	0.088	-0.17	0.01	-0.69	3.2e-33	0.36	2.2e-08	0.66	2.5e-30	0.67	3.9e-31	-0.073	0.27	0.42	6.1e-11	0.27	2.9e-05	0.27	3e-05
VCAN	green	-0.6	2.7e-23	0.6	2.7e-23	0.086	0.19	-0.21	0.0012	-0.67	1.1e-30	0.048	0.47	0.62	6.2e-26	0.93	1.1e-100	0.031	0.64	0.55	9.1e-20	0.36	3e-08	0.23	0.00059
VGLL3	green	-0.31	1.8e-06	0.31	1.8e-06	0.076	0.25	-0.12	0.07	-0.46	2.1e-13	-0.097	0.14	0.49	5e-15	0.83	4.2e-58	0.066	0.32	0.46	2e-13	0.2	0.0029	0.13	0.057
VIM	green	-0.34	1.1e-07	0.34	1.1e-07	0.073	0.27	-0.088	0.19	-0.49	5.6e-15	-0.077	0.25	0.33	5.1e-07	0.74	1.2e-40	0.3	3.5e-06	0.53	7e-18	0.23	0.00054	-0.13	0.046
WNT2	green	-0.44	1.9e-12	0.44	1.9e-12	-0.11	0.11	-0.23	0.00059	-0.56	4.2e-20	0.14	0.033	0.51	1.4e-16	0.76	1.2e-44	0.058	0.38	0.52	5.1e-17	0.27	5.1e-05	0.16	0.015
ZCCHC24	green	0.069	0.3	-0.069	0.3	0.54	2e-18	0.26	5.4e-05	0.0096	0.89	-0.68	8.8e-32	-0.073	0.28	0.58	3e-22	0.035	0.6	0.047	0.48	-0.19	0.0036	-0.29	7.7e-06
ZEB1	green	-0.12	0.083	0.12	0.083	0.46	3.3e-13	0.074	0.27	-0.33	2.4e-07	-0.32	1e-06	0.24	0.00029	0.78	9.9e-48	0.1	0.13	0.32	1.2e-06	0.0081	0.9	-0.17	0.0094
ZNF469	green	-0.48	2.1e-14	0.48	2.1e-14	-0.07	0.3	-0.26	8.2e-05	-0.58	3.1e-22	0.1	0.12	0.62	8.9e-26	0.81	5.2e-54	0.0059	0.93	0.48	2.7e-14	0.27	2.9e-05	0.26	5.7e-05
ZNF521	green	0.026	0.69	-0.026	0.69	0.42	5e-11	0.16	0.014	0.022	0.74	-0.55	1.1e-19	-0.086	0.2	0.59	1.7e-22	0.025	0.7	0.048	0.47	-0.14	0.04	-0.27	2.7e-05
ZNF532	green	-0.63	1e-26	0.63	1e-26	-0.056	0.4	-0.32	8e-07	-0.69	2.3e-33	0.4	3.6e-10	0.52	6.7e-17	0.61	1.7e-24	0.074	0.27	0.38	2.4e-09	0.36	1.7e-08	0.16	0.015
AADACL2	grey	0.045	0.5	-0.045	0.5	0.057	0.39	-0.037	0.58	0.36	1.6e-08	-0.3	3.8e-06	-0.29	6.3e-06	-0.2	0.0021	-0.06	0.37	-0.29	8.5e-06	-0.18	0.0052	0.083	0.21
AADACP1	grey	0.24	0.00025	-0.24	0.00025	0.01	0.88	0.2	0.0026	0.31	2.2e-06	-0.09	0.17	-0.24	0.00023	-0.21	0.0014	-0.24	0.00022	-0.32	1e-06	-0.34	1.4e-07	-0.12	0.077
AATBC	grey	-0.15	0.025	0.15	0.025	-0.088	0.19	-0.13	0.042	0.081	0.23	0.092	0.16	-0.2	0.0025	-0.18	0.0055	-0.042	0.52	-0.17	0.0096	0.0091	0.89	-0.016	0.8
ABCA12	grey	-0.44	2.9e-12	0.44	2.9e-12	-0.26	6.2e-05	-0.29	8.4e-06	-0.12	0.08	0.1	0.12	0.35	4.9e-08	0.038	0.57	-0.1	0.12	0.063	0.35	0.29	1e-05	0.69	4.3e-34
ABCA13	grey	-0.29	1.1e-05	0.29	1.1e-05	-0.21	0.0011	-0.15	0.025	-0.19	0.005	0.38	2.7e-09	-0.0068	0.92	-0.014	0.83	0.16	0.015	0.12	0.08	0.11	0.097	-0.11	0.085
ABCB10	grey	0.058	0.38	-0.058	0.38	-0.17	0.011	-0.0046	0.94	0.077	0.24	0.19	0.0032	-0.2	0.0027	-0.22	0.0007	0.085	0.2	0.027	0.69	-0.0092	0.89	-0.17	0.012
ABCC1	grey	-0.4	3.5e-10	0.4	3.5e-10	-0.22	0.00087	-0.25	0.00011	-0.28	1.7e-05	0.27	3.1e-05	0.28	1.8e-05	0.16	0.017	-0.023	0.73	0.18	0.0071	0.15	0.025	0.28	1.3e-05
ABCC5	grey	-0.25	0.00015	0.25	0.00015	-0.061	0.36	-0.07	0.29	-0.059	0.37	0.32	1.2e-06	-0.047	0.48	-0.074	0.27	-0.11	0.086	-0.067	0.31	-0.02	0.76	0.0051	0.94
ABCG1	grey	-0.46	1.6e-13	0.46	1.6e-13	-0.12	0.07	-0.27	4e-05	-0.4	5e-10	0.13	0.043	0.28	2.5e-05	0.23	0.0004	0.32	8.8e-07	0.42	2.2e-11	0.42	4e-11	0.16	0.017
ABRACL	grey	0.0027	0.97	-0.0027	0.97	-0.28	1.3e-05	-0.082	0.22	-0.14	0.032	0.28	1.7e-05	-0.077	0.24	-0.1	0.12	0.41	1.6e-10	0.29	7.5e-06	0.2	0.0021	-0.26	7.1e-05
ACADM	grey	0.51	3.3e-16	-0.51	3.3e-16	0.27	3e-05	0.31	2e-06	0.43	1.7e-11	-0.22	0.00098	-0.58	1.5e-21	-0.35	5.3e-08	0.11	0.087	-0.26	7.6e-05	-0.3	3.9e-06	-0.56	4.5e-20
ACAT2	grey	0.39	1.2e-09	-0.39	1.2e-09	-0.059	0.37	0.14	0.041	0.5	1.6e-15	0.057	0.39	-0.46	2.1e-13	-0.52	3.8e-17	-0.18	0.0066	-0.5	3.8e-16	-0.35	4.9e-08	-0.19	0.0046
ACE2	grey	-0.093	0.16	0.093	0.16	-0.18	0.0052	-0.15	0.022	0.11	0.1	0.077	0.24	0.076	0.25	-0.22	0.00088	-0.064	0.33	-0.0005	0.99	0.36	2.4e-08	0.37	5.4e-09
ACKR4	grey	-0.12	0.083	0.12	0.083	0.068	0.31	0.0014	0.98	0.0032	0.96	-0.2	0.0023	0.11	0.11	0.22	0.00066	-0.035	0.6	0.1	0.12	0.17	0.0097	0.18	0.008
ACOT7	grey	-0.43	6.9e-12	0.43	6.9e-12	-0.36	3e-08	-0.47	9.3e-14	-0.39	7.4e-10	0.56	1.5e-20	0.63	6.8e-27	0.1	0.13	-0.2	0.0024	0.25	0.00012	0.43	1.2e-11	0.71	9.5e-36
ACVR1C	grey	-0.41	1.4e-10	0.41	1.4e-10	-0.26	7e-05	-0.15	0.021	-0.42	6.5e-11	0.47	5.2e-14	0.37	9e-09	0.11	0.085	-0.11	0.11	0.14	0.033	0.25	0.00013	0.22	0.00062
ADAM1A	grey	0.19	0.0035	-0.19	0.0035	-0.0029	0.96	0.069	0.3	0.12	0.077	0.026	0.69	-0.43	1.5e-11	-0.22	0.001	0.39	7e-10	0.033	0.62	-0.025	0.71	-0.52	4e-17
ADAM23	grey	-0.31	2.4e-06	0.31	2.4e-06	-0.12	0.077	-0.16	0.014	-0.2	0.0025	0.1	0.13	0.12	0.075	0.14	0.03	0.0093	0.89	0.16	0.019	0.13	0.048	0.13	0.051
ADAM9	grey	-0.27	5e-05	0.27	5e-05	-0.19	0.0034	0.06	0.37	-0.32	6.4e-07	0.37	8.4e-09	0.48	7.6e-15	0.21	0.0013	-0.33	5.1e-07	0.12	0.08	0.067	0.31	0.34	1.1e-07
ADAMTS1	grey	-0.065	0.33	0.065	0.33	0.23	0.00036	0.13	0.044	-0.15	0.026	-0.19	0.0033	0.28	1.5e-05	0.38	1.8e-09	-0.13	0.055	0.16	0.019	0.038	0.57	0.084	0.2
ADAMTS5	grey	0.011	0.86	-0.011	0.86	0.43	1.1e-11	0.17	0.0088	-0.096	0.15	-0.36	2.4e-08	0.15	0.027	0.56	3.5e-20	-0.19	0.0035	0.11	0.089	-0.2	0.0031	-0.11	0.092
ADAMTSL4	grey	0.3	3.4e-06	-0.3	3.4e-06	0.2	0.0023	0.05	0.45	0.4	5e-10	-0.38	2e-09	-0.056	0.4	-0.15	0.02	-0.32	7.8e-07	-0.21	0.0015	-0.14	0.037	0.23	0.00054
ADAP2	grey	-0.41	1.2e-10	0.41	1.2e-10	-0.12	0.074	-0.29	7.6e-06	-0.13	0.044	-0.15	0.029	0.21	0.0018	0.13	0.051	0.12	0.073	0.25	0.00015	0.35	5.4e-08	0.42	2.9e-11
ADD3	grey	0.31	1.8e-06	-0.31	1.8e-06	0.11	0.1	0.28	1.6e-05	0.23	0.00052	-0.2	0.002	-0.52	5.5e-17	-0.04	0.54	0.3	2.8e-06	-0.074	0.27	-0.23	0.00046	-0.69	2e-33
ADGRA2	grey	0.095	0.15	-0.095	0.15	0.45	4.9e-13	0.15	0.023	0.081	0.23	-0.61	1.2e-24	-0.081	0.22	0.5	1e-15	-0.038	0.57	4.9e-05	1	-0.21	0.0012	-0.22	0.00076
ADGRE1	grey	-0.28	2.2e-05	0.28	2.2e-05	-0.19	0.0036	-0.17	0.013	-0.42	3.6e-11	0.22	0.00076	0.35	7e-08	0.21	0.0018	0.26	6.6e-05	0.53	6.1e-18	0.47	3.3e-14	0.15	0.024
ADGRF4	grey	0.17	0.0091	-0.17	0.0091	-0.16	0.017	-0.046	0.49	0.31	2.5e-06	0.038	0.57	0.14	0.039	-0.24	0.00023	-0.43	6.8e-12	-0.34	1.8e-07	-0.16	0.017	0.51	2e-16
ADGRF5	grey	-0.17	0.0095	0.17	0.0095	0.49	2.3e-15	0.04	0.55	-0.2	0.003	-0.41	1e-10	0.22	0.001	0.54	1.9e-18	-0.13	0.048	0.17	0.011	-0.043	0.52	0.017	0.8
ADGRG2	grey	0.48	1.1e-14	-0.48	1.1e-14	0.29	1.1e-05	0.59	2.3e-22	0.24	0.00033	-0.38	2.6e-09	-0.45	9.2e-13	-0.12	0.079	0.13	0.051	-0.2	0.003	-0.32	6.1e-07	-0.63	1.8e-26
ADGRG6	grey	0.46	1.7e-13	-0.46	1.7e-13	-0.058	0.38	0.19	0.0043	0.5	4.5e-16	-0.067	0.31	-0.49	2.2e-15	-0.5	4.7e-16	-0.12	0.069	-0.43	1.1e-11	-0.34	1.2e-07	-0.32	6.7e-07
ADGRG7	grey	0.083	0.21	-0.083	0.21	-0.00068	0.99	-0.011	0.87	0.03	0.65	-0.049	0.47	-0.014	0.84	-0.044	0.51	-0.015	0.82	0.00028	1	-0.031	0.64	0.022	0.75
ADGRL4	grey	-0.18	0.0052	0.18	0.0052	0.37	5.5e-09	-0.0078	0.91	-0.22	0.00094	-0.38	4.6e-09	0.18	0.0077	0.5	7.5e-16	0.12	0.061	0.34	1.3e-07	0.11	0.1	-0.04	0.55
ADH1C	grey	0.23	0.00038	-0.23	0.00038	0.056	0.4	0.35	5.2e-08	0.32	7.2e-07	-0.21	0.0014	-0.34	1.7e-07	-0.22	0.00095	-0.1	0.12	-0.34	2.1e-07	-0.3	4.6e-06	-0.26	5.4e-05
ADIPOQ	grey	0.33	2.3e-07	-0.33	2.3e-07	0.4	2.7e-10	0.41	1.6e-10	0.39	1.6e-09	-0.42	2.2e-11	-0.36	2.5e-08	-0.11	0.099	-0.24	0.00031	-0.39	1.5e-09	-0.41	8e-11	-0.28	2.5e-05
ADIRF	grey	0.39	7.2e-10	-0.39	7.2e-10	0.2	0.0024	0.21	0.0014	0.58	1.1e-21	-0.29	7.1e-06	-0.52	5.5e-17	-0.51	1.2e-16	-0.15	0.02	-0.47	5.8e-14	-0.33	5.2e-07	-0.2	0.0029
ADRB2	grey	0.051	0.44	-0.051	0.44	-0.024	0.72	-0.055	0.41	0.19	0.0036	-0.0099	0.88	-0.0076	0.91	-0.26	5.1e-05	-0.21	0.0013	-0.26	7e-05	-0.053	0.42	0.23	0.00037
ADTRP	grey	-0.38	4e-09	0.38	4e-09	-0.25	0.0001	-0.36	1.9e-08	-0.54	9.7e-19	0.39	1.6e-09	0.54	2.5e-18	0.23	0.00039	0.16	0.017	0.39	1.3e-09	0.38	3.3e-09	0.33	2.3e-07
AFAP1-AS1	grey	-0.28	1.9e-05	0.28	1.9e-05	-0.13	0.047	-0.07	0.29	-0.27	3.8e-05	0.22	0.00072	0.23	0.00044	0.11	0.11	0.039	0.56	0.2	0.0026	0.26	6.1e-05	0.16	0.019
AGA	grey	0.45	7.1e-13	-0.45	7.1e-13	-0.019	0.78	0.2	0.0023	0.54	6.1e-19	-0.27	4.4e-05	-0.4	2.6e-10	-0.38	4.7e-09	-0.1	0.12	-0.41	8.3e-11	-0.31	1.4e-06	-0.098	0.14
AGL	grey	0.27	2.7e-05	-0.27	2.7e-05	0.46	2.3e-13	0.14	0.031	0.27	3e-05	-0.074	0.27	-0.46	2.5e-13	-0.31	1.5e-06	-0.0053	0.94	-0.32	9e-07	-0.28	2.4e-05	-0.42	4e-11
AGPAT4	grey	-0.31	1.6e-06	0.31	1.6e-06	-0.047	0.48	-0.25	0.00013	-0.36	3.1e-08	0.052	0.44	0.6	7.1e-24	0.5	1.1e-15	-0.22	0.0007	0.25	0.00012	0.17	0.009	0.52	6.9e-17
AHCY	grey	0.27	3.1e-05	-0.27	3.1e-05	-0.045	0.5	0.1	0.13	0.26	7.6e-05	0.079	0.24	-0.15	0.022	-0.22	0.00073	-0.26	5.8e-05	-0.29	7.2e-06	-0.34	9e-08	-0.078	0.24
AHRR	grey	-0.026	0.69	0.026	0.69	-0.084	0.2	0.043	0.52	0.18	0.006	-0.11	0.088	-0.18	0.0056	-0.12	0.071	-0.026	0.7	-0.19	0.0031	-0.088	0.19	-0.05	0.45
AJAP1	grey	-0.26	5.4e-05	0.26	5.4e-05	-0.11	0.086	-0.14	0.032	-0.29	7.6e-06	0.17	0.0098	0.55	1.3e-19	0.22	0.00082	-0.25	0.0001	0.074	0.27	0.14	0.038	0.55	4.2e-19
AK3	grey	0.42	6.1e-11	-0.42	6.1e-11	0.17	0.0094	0.19	0.0043	0.5	1.4e-15	-0.3	3.3e-06	-0.57	1.1e-20	-0.38	3.4e-09	0.082	0.22	-0.22	0.00066	-0.22	0.00072	-0.34	9.2e-08
AK4	grey	0.059	0.37	-0.059	0.37	0.058	0.38	0.05	0.45	0.12	0.073	0.03	0.65	0.18	0.0068	-0.061	0.36	-0.51	2.2e-16	-0.29	7.8e-06	-0.18	0.0066	0.38	5e-09
AK4P1	grey	-0.048	0.47	0.048	0.47	0.017	0.79	-0.037	0.58	-0.021	0.75	0.11	0.086	0.37	1.1e-08	0.072	0.28	-0.5	1.6e-15	-0.14	0.029	-0.046	0.49	0.51	3.6e-16
AKAP12	grey	0.4	3e-10	-0.4	3e-10	0.49	2.9e-15	0.37	5.6e-09	0.24	0.00024	-0.61	5.8e-25	-0.19	0.0047	0.29	8e-06	-0.082	0.22	-0.11	0.088	-0.42	4.7e-11	-0.32	5.6e-07
AKAP2	grey	-0.14	0.029	0.14	0.029	0.18	0.008	-0.021	0.75	-0.4	2.1e-10	-0.19	0.0034	0.2	0.0024	0.51	2.2e-16	0.49	3.4e-15	0.48	8.5e-15	0.18	0.0057	-0.23	0.00045
AKR1B1	grey	-0.45	1.2e-12	0.45	1.2e-12	0.16	0.019	-0.19	0.0043	-0.58	9.5e-22	0.16	0.017	0.36	2.7e-08	0.47	4.5e-14	0.28	2.5e-05	0.55	4.8e-19	0.29	9.9e-06	0.002	0.98
AKR1B10	grey	-0.23	0.00042	0.23	0.00042	-0.065	0.33	-0.13	0.048	0.12	0.067	-0.035	0.6	0.12	0.079	-0.091	0.17	-0.24	0.00034	-0.084	0.21	0.072	0.28	0.5	5e-16
AKR1C1	grey	-0.14	0.03	0.14	0.03	-0.044	0.51	0.052	0.43	0.016	0.81	-0.015	0.82	0.067	0.32	0.011	0.86	-0.24	0.00031	-0.1	0.12	-0.12	0.064	0.2	0.0019
AKR1C2	grey	-0.12	0.07	0.12	0.07	-0.0084	0.9	0.092	0.17	0.1	0.11	-0.096	0.15	0.068	0.31	0.00074	0.99	-0.31	1.4e-06	-0.19	0.0037	-0.16	0.016	0.29	9.2e-06
AKR1C3	grey	-0.13	0.043	0.13	0.043	0.067	0.32	0.099	0.14	0.051	0.44	-0.13	0.058	0.07	0.29	0.067	0.31	-0.23	0.00035	-0.098	0.14	-0.092	0.17	0.22	0.00066
ALCAM	grey	0.012	0.86	-0.012	0.86	0.0074	0.91	0.29	1.2e-05	-0.16	0.015	0.13	0.043	0.018	0.78	0.13	0.047	0.027	0.68	0.096	0.15	-0.16	0.015	-0.3	2.7e-06
ALDH1A3	grey	0.42	2.6e-11	-0.42	2.6e-11	0.098	0.14	0.46	2.1e-13	0.43	1.7e-11	-0.35	5.3e-08	-0.26	9.4e-05	-0.2	0.0021	-0.18	0.0058	-0.28	2.3e-05	-0.37	8.2e-09	-0.15	0.022
ALDH7A1	grey	0.41	1.9e-10	-0.41	1.9e-10	0.1	0.13	0.23	0.00036	0.48	2.5e-14	-0.28	1.5e-05	-0.31	2.3e-06	-0.31	1.6e-06	-0.23	0.00039	-0.43	9e-12	-0.28	1.4e-05	-0.062	0.35
ALDOC	grey	0.17	0.012	-0.17	0.012	-0.11	0.085	0.12	0.067	0.3	3.9e-06	0.021	0.75	-0.32	7.3e-07	-0.34	2e-07	-0.14	0.029	-0.38	4.9e-09	-0.33	3.1e-07	-0.15	0.025
ALKAL2	grey	0.077	0.24	-0.077	0.24	0.00089	0.99	0.13	0.057	0.053	0.43	-0.044	0.51	-0.23	0.0005	-0.0045	0.95	0.093	0.16	-0.082	0.22	-0.22	0.00067	-0.36	2e-08
ALOX12B	grey	-0.3	5.5e-06	0.3	5.5e-06	-0.16	0.015	-0.25	0.00016	0.085	0.2	-0.053	0.43	0.052	0.44	-0.12	0.062	0.087	0.19	-0.0075	0.91	0.22	0.00068	0.44	1.7e-12
ALOX15B	grey	-0.19	0.0039	0.19	0.0039	-0.25	0.00019	-0.2	0.0022	-0.062	0.35	0.073	0.27	0.13	0.049	-0.0086	0.9	0.04	0.55	0.11	0.088	0.2	0.0026	0.29	9.1e-06
ALOXE3	grey	-0.36	2.2e-08	0.36	2.2e-08	-0.17	0.0087	-0.27	4.8e-05	-0.0083	0.9	-0.0098	0.88	0.21	0.0015	-0.032	0.63	-0.07	0.29	0.028	0.68	0.24	0.0002	0.59	1.4e-22
ALPK2	grey	-0.22	0.00092	0.22	0.00092	0.078	0.24	-0.25	0.00012	-0.52	5.4e-17	0.14	0.036	0.42	3.6e-11	0.55	2.2e-19	0.22	0.00066	0.43	6.7e-12	0.26	7e-05	0.033	0.63
AMDHD1	grey	-0.13	0.045	0.13	0.045	-0.11	0.098	-0.095	0.15	-0.078	0.24	0.1	0.13	0.022	0.74	0.068	0.3	0.08	0.23	0.073	0.27	0.078	0.24	0.033	0.62
AMFR	grey	0.26	5.7e-05	-0.26	5.7e-05	0.074	0.26	0.082	0.22	0.32	1.1e-06	-0.21	0.0017	-0.09	0.18	-0.18	0.0078	-0.24	0.00026	-0.28	1.5e-05	-0.2	0.0025	0.16	0.018
AMMECR1	grey	-0.1	0.12	0.1	0.12	-0.2	0.0019	-0.21	0.0011	0.15	0.024	0.14	0.035	0.2	0.002	-0.24	0.00025	-0.32	6.9e-07	-0.21	0.0017	0.036	0.59	0.62	7.2e-26
AMOTL2	grey	0.49	4.3e-15	-0.49	4.3e-15	0.16	0.013	0.2	0.0019	0.54	6.7e-19	-0.31	2.3e-06	-0.33	4.7e-07	-0.23	0.00053	-0.24	0.0003	-0.42	5.9e-11	-0.37	5.9e-09	-0.12	0.078
ANGPTL4	grey	-0.32	8.7e-07	0.32	8.7e-07	-0.25	0.0001	-0.35	3.7e-08	-0.39	8e-10	0.35	5e-08	0.59	4.4e-23	0.2	0.0027	-0.22	0.00083	0.27	4.9e-05	0.24	0.0002	0.53	8.2e-18
ANKRD29	grey	-0.1	0.13	0.1	0.13	0.034	0.61	-0.12	0.071	-0.0085	0.9	-0.086	0.19	-0.02	0.76	-0.0064	0.92	0.049	0.46	-0.056	0.4	0.071	0.29	0.08	0.23
ANKRD33B	grey	0.057	0.39	-0.057	0.39	0.061	0.36	-0.15	0.023	-0.16	0.015	0.15	0.022	-0.073	0.27	-0.044	0.51	0.21	0.0016	0.14	0.039	0.072	0.28	-0.27	2.9e-05
ANKRD36	grey	-0.081	0.22	0.081	0.22	-0.088	0.19	0.046	0.49	-0.17	0.0097	0.12	0.062	-0.11	0.11	0.11	0.098	0.39	1.4e-09	0.25	0.00015	0.073	0.27	-0.35	7.7e-08
ANKRD36B	grey	0.073	0.28	-0.073	0.28	0.034	0.61	0.21	0.0016	-0.027	0.68	-0.035	0.6	-0.34	1.1e-07	0.021	0.76	0.43	1.6e-11	0.097	0.14	-0.075	0.26	-0.6	7.4e-24
ANKRD37	grey	0.42	4.2e-11	-0.42	4.2e-11	0.082	0.22	0.21	0.0017	0.54	1.5e-18	-0.22	0.00095	-0.37	5.5e-09	-0.36	2.8e-08	-0.3	3.7e-06	-0.46	4.4e-13	-0.44	3e-12	-0.11	0.1
ANKRD6	grey	0.3	2.9e-06	-0.3	2.9e-06	0.19	0.004	0.23	0.00049	0.39	1.1e-09	-0.29	1.2e-05	-0.55	3e-19	-0.12	0.072	-0.0054	0.94	-0.3	3.7e-06	-0.45	8.7e-13	-0.57	6.8e-21
ANO9	grey	0.045	0.5	-0.045	0.5	-0.13	0.05	-0.18	0.0058	0.24	0.00031	-0.13	0.042	-0.34	2.2e-07	-0.36	1.4e-08	0.26	7.7e-05	-0.089	0.18	0.11	0.1	-0.11	0.11
ANOS1	grey	-0.23	0.00038	0.23	0.00038	0.092	0.17	0.21	0.0017	-0.28	2.1e-05	-0.0098	0.88	0.2	0.0022	0.5	4.8e-16	-0.15	0.023	0.087	0.19	-0.014	0.83	-0.087	0.19
ANXA10	grey	-0.16	0.019	0.16	0.019	-0.13	0.047	-0.13	0.059	-0.2	0.0024	0.19	0.0032	0.22	0.00069	0.082	0.22	-0.068	0.31	0.12	0.073	0.12	0.08	0.19	0.0036
ANXA3	grey	0.24	0.00019	-0.24	0.00019	0.061	0.36	0.24	0.00025	0.082	0.22	-0.03	0.65	0.23	0.00052	0.04	0.54	-0.36	1.4e-08	-0.12	0.063	-0.12	0.075	0.2	0.0029
AOC1	grey	-0.3	3.8e-06	0.3	3.8e-06	-0.22	0.00071	-0.26	7.2e-05	-0.18	0.0067	0.1	0.13	0.18	0.0069	-0.021	0.76	0.38	5e-09	0.31	1.4e-06	0.39	1.1e-09	0.25	0.00017
AOPEP	grey	-0.017	0.8	0.017	0.8	0.062	0.35	-0.026	0.7	0.2	0.0023	0.076	0.26	-0.22	0.00066	-0.16	0.013	-0.2	0.0022	-0.25	0.00015	-0.063	0.34	-0.038	0.57
AOX1	grey	0.34	2.2e-07	-0.34	2.2e-07	0.47	5.1e-14	0.37	6.6e-09	0.38	1.9e-09	-0.6	4.4e-24	-0.36	1.5e-08	-0.023	0.73	-0.012	0.85	-0.18	0.0068	-0.31	2.6e-06	-0.3	4.3e-06
AP1M2	grey	0.4	2.3e-10	-0.4	2.3e-10	0.026	0.7	0.24	0.00031	0.56	3.1e-20	-0.15	0.022	-0.21	0.0013	-0.48	1.1e-14	-0.53	6.1e-18	-0.58	8.8e-22	-0.37	8.6e-09	0.2	0.0024
AP1S1	grey	-0.41	9.8e-11	0.41	9.8e-11	-0.34	1.6e-07	-0.24	0.00022	-0.39	1.1e-09	0.41	9.2e-11	0.58	3e-22	0.11	0.093	-0.27	4.2e-05	0.16	0.015	0.25	0.00017	0.61	9.5e-25
APCDD1	grey	-0.29	6.9e-06	0.29	6.9e-06	0.022	0.74	-0.092	0.17	-0.011	0.87	-0.16	0.016	0.29	9.2e-06	0.26	6.2e-05	-0.39	1e-09	-0.12	0.074	0.086	0.19	0.53	7.4e-18
APELA	grey	-0.29	6.6e-06	0.29	6.6e-06	-0.027	0.69	-0.11	0.091	-0.24	0.00022	0.014	0.83	0.26	5.4e-05	0.38	2.1e-09	0.055	0.41	0.24	0.00024	0.22	0.00072	0.19	0.0031
APLNR	grey	-0.22	0.00079	0.22	0.00079	0.29	1.2e-05	-0.079	0.24	-0.16	0.018	-0.3	3.5e-06	0.054	0.42	0.39	1.6e-09	0.11	0.1	0.17	0.0089	0.025	0.71	-0.087	0.19
AREG	grey	-0.13	0.05	0.13	0.05	-0.18	0.0077	-0.16	0.016	-0.19	0.0034	0.18	0.0057	0.6	1.8e-23	0.22	0.00075	-0.32	8.7e-07	0.11	0.11	0.14	0.036	0.6	1.2e-23
ARG1	grey	0.06	0.37	-0.06	0.37	0.037	0.58	-0.082	0.22	0.34	9.8e-08	-0.3	4.6e-06	-0.2	0.0027	-0.2	0.0024	-0.052	0.43	-0.21	0.0013	-0.096	0.15	0.22	0.00094
ARG2	grey	0.24	0.00026	-0.24	0.00026	-0.041	0.54	0.14	0.035	0.4	3.4e-10	-0.034	0.61	-0.11	0.11	-0.33	4.6e-07	-0.48	1.2e-14	-0.48	1.5e-14	-0.36	1.8e-08	0.2	0.0031
ARHGAP18	grey	-0.14	0.03	0.14	0.03	0.043	0.52	0.11	0.099	-0.32	9.5e-07	-0.14	0.033	0.17	0.0096	0.46	4.5e-13	0.37	1.1e-08	0.58	1.4e-21	0.32	6.6e-07	-0.14	0.041
ARHGAP21	grey	-0.33	2.3e-07	0.33	2.3e-07	0.013	0.85	-0.077	0.25	-0.44	4.4e-12	0.17	0.0086	0.55	2.2e-19	0.52	7.4e-17	-0.29	7.2e-06	0.23	0.00037	0.17	0.012	0.31	1.4e-06
ARHGEF3	grey	0.31	1.8e-06	-0.31	1.8e-06	0.045	0.5	0.21	0.0013	0.39	1.5e-09	-0.27	3.4e-05	-0.63	1e-26	-0.41	8.3e-11	0.45	1.5e-12	-0.026	0.69	-0.035	0.6	-0.52	3.5e-17
ARHGEF37	grey	0.17	0.0095	-0.17	0.0095	0.087	0.19	0.2	0.0026	0.45	8.7e-13	-0.29	8.5e-06	-0.17	0.011	-0.33	2.5e-07	-0.38	3.6e-09	-0.46	1.8e-13	-0.16	0.014	0.32	1.1e-06
ARHGEF5	grey	0.16	0.016	-0.16	0.016	-0.011	0.86	0.12	0.077	0.28	1.8e-05	-0.075	0.26	0.032	0.63	-0.16	0.017	-0.43	1.4e-11	-0.31	1.6e-06	-0.21	0.0017	0.29	8.7e-06
ARL14	grey	-0.071	0.28	0.071	0.28	-0.17	0.01	-0.19	0.004	-0.13	0.05	0.11	0.1	0.32	5.7e-07	-0.042	0.53	-0.024	0.72	0.12	0.073	0.27	2.9e-05	0.39	9.7e-10
ARL4A	grey	0.43	1.3e-11	-0.43	1.3e-11	0.2	0.0027	0.25	0.00012	0.52	3.3e-17	-0.42	2.8e-11	-0.4	4.8e-10	-0.2	0.003	-0.2	0.0021	-0.38	3e-09	-0.46	2.6e-13	-0.16	0.014
ARL9	grey	-0.085	0.2	0.085	0.2	-0.031	0.64	-0.12	0.061	0.042	0.53	0.12	0.073	0.021	0.75	-0.087	0.19	-0.2	0.0022	-0.21	0.0017	-0.061	0.36	0.14	0.029
ARNT2	grey	-0.15	0.027	0.15	0.027	-0.08	0.23	-0.062	0.35	-0.27	3.8e-05	0.24	0.0003	-0.065	0.33	0.11	0.11	0.25	0.00012	0.23	0.00039	0.12	0.075	-0.39	1.1e-09
ARNTL2	grey	-0.058	0.39	0.058	0.39	-0.35	5.1e-08	-0.29	6.5e-06	0.046	0.49	0.39	1.7e-09	0.18	0.0062	-0.24	0.00028	-0.077	0.25	0.065	0.33	0.17	0.0084	0.38	1.9e-09
ARPC1A	grey	-0.21	0.0017	0.21	0.0017	-0.23	0.00056	-0.16	0.014	-0.088	0.18	0.34	1.4e-07	0.39	1.2e-09	-0.0089	0.89	-0.48	1.6e-14	-0.15	0.027	-0.035	0.6	0.58	4.3e-22
ARRDC3	grey	0.33	2.6e-07	-0.33	2.6e-07	0.051	0.45	0.22	0.00081	0.46	2.5e-13	-0.33	2.3e-07	-0.53	6.7e-18	-0.25	0.00018	0.11	0.086	-0.24	0.00034	-0.24	0.00019	-0.39	1.7e-09
ARRDC4	grey	-0.32	8.9e-07	0.32	8.9e-07	-0.082	0.22	-0.11	0.11	-0.18	0.0063	-0.06	0.37	0.47	7e-14	0.22	0.00082	-0.26	7.8e-05	0.094	0.16	0.21	0.0014	0.63	3.1e-26
ASAP1-IT1	grey	-0.44	5.7e-12	0.44	5.7e-12	-0.15	0.025	-0.32	7.1e-07	-0.54	1.3e-18	0.14	0.029	0.39	1.5e-09	0.43	6.6e-12	0.39	7.7e-10	0.59	8e-23	0.43	1.2e-11	0.12	0.065
ASAP2	grey	-0.28	1.3e-05	0.28	1.3e-05	0.063	0.34	0.003	0.96	-0.32	9.3e-07	0.16	0.016	0.49	1.9e-15	0.38	1.9e-09	-0.43	9.6e-12	0.046	0.49	-0.027	0.69	0.32	5.3e-07
ASB2	grey	-0.082	0.22	0.082	0.22	0.29	6.3e-06	-0.1	0.13	-0.18	0.0052	0.19	0.005	0.12	0.061	0.016	0.81	-0.0012	0.99	0.019	0.77	0.036	0.59	0.016	0.81
ASL	grey	0.44	3.2e-12	-0.44	3.2e-12	0.071	0.29	0.31	2.2e-06	0.48	3.1e-14	-0.23	0.00058	-0.24	0.00032	-0.28	1.9e-05	-0.33	2.2e-07	-0.43	1.4e-11	-0.45	5.1e-13	-0.047	0.48
ASPHD2	grey	-0.24	0.00034	0.24	0.00034	-0.15	0.022	-0.16	0.018	-0.4	3e-10	0.15	0.022	0.42	3.8e-11	0.34	1.2e-07	0.21	0.0017	0.37	9.8e-09	0.34	1.4e-07	0.21	0.0018
ASPRV1	grey	-0.33	2.3e-07	0.33	2.3e-07	-0.036	0.59	-0.18	0.0073	-0.0098	0.88	-0.11	0.086	0.18	0.0059	0.07	0.29	-0.059	0.38	0.036	0.59	0.22	0.001	0.47	4.4e-14
ASS1	grey	-0.21	0.0013	0.21	0.0013	-0.13	0.057	0.047	0.48	-0.11	0.11	0.25	0.00016	0.039	0.56	-0.14	0.039	-0.033	0.62	0.069	0.3	0.25	0.00016	0.071	0.29
ASTN2	grey	-0.41	1.6e-10	0.41	1.6e-10	-0.24	0.00024	-0.19	0.0041	-0.37	1.2e-08	0.42	5.4e-11	0.17	0.011	0.11	0.11	0.15	0.021	0.29	8e-06	0.32	9e-07	0.065	0.33
ATF3	grey	-0.25	0.00012	0.25	0.00012	-0.18	0.0078	0.012	0.86	-0.16	0.013	0.19	0.004	0.17	0.011	0.055	0.41	-0.075	0.26	0.086	0.2	0.12	0.066	0.089	0.18
ATL1	grey	0.32	7.5e-07	-0.32	7.5e-07	0.22	0.00082	0.43	6.5e-12	0.28	1.6e-05	-0.44	2.3e-12	-0.26	8e-05	0.19	0.004	-0.19	0.0048	-0.25	0.00016	-0.41	7.7e-11	-0.34	1.2e-07
ATP10D	grey	-0.14	0.037	0.14	0.037	-0.17	0.011	-0.24	0.00024	0.031	0.64	0.058	0.38	0.35	4.4e-08	-0.028	0.67	-0.25	0.0001	-0.11	0.11	0.096	0.15	0.67	3.3e-31
ATP11B	grey	0.089	0.18	-0.089	0.18	-0.28	1.5e-05	-0.057	0.39	0.35	3.7e-08	0.086	0.2	0.017	0.8	-0.34	1.5e-07	-0.38	2.5e-09	-0.34	2e-07	-0.18	0.0059	0.48	8.1e-15
ATP2B1	grey	-0.27	3.1e-05	0.27	3.1e-05	-0.14	0.034	-0.15	0.026	-0.39	1.1e-09	0.27	4.9e-05	0.23	0.00042	0.2	0.003	0.24	0.0002	0.32	6.4e-07	0.1	0.13	-0.016	0.81
ATP2B1-AS1	grey	0.099	0.14	-0.099	0.14	0.057	0.39	0.14	0.039	0.018	0.79	-0.26	9.3e-05	-0.32	7.8e-07	-0.0077	0.91	0.48	1.3e-14	0.14	0.029	-0.11	0.11	-0.53	7.8e-18
AVPI1	grey	-0.097	0.14	0.097	0.14	-0.15	0.02	-0.06	0.37	0.17	0.0084	-0.037	0.58	0.022	0.74	-0.17	0.012	-0.23	0.00052	-0.15	0.021	0.053	0.42	0.32	8.6e-07
B3GALNT1	grey	0.3	5.5e-06	-0.3	5.5e-06	0.05	0.45	0.24	0.00024	0.24	0.00028	-0.026	0.69	-0.36	1.4e-08	-0.1	0.13	0.029	0.67	-0.16	0.019	-0.23	0.00056	-0.48	1.2e-14
B3GNT3	grey	0.42	4.1e-11	-0.42	4.1e-11	0.1	0.13	0.46	1.8e-13	0.44	2.9e-12	-0.3	3.7e-06	-0.29	8.8e-06	-0.34	1.8e-07	-0.19	0.0031	-0.37	8.3e-09	-0.32	6e-07	-0.15	0.027
B3GNT5	grey	-0.26	5.9e-05	0.26	5.9e-05	-0.25	0.00016	-0.16	0.016	-0.24	0.00028	0.45	1e-12	0.52	6.1e-17	0.017	0.8	-0.4	2.5e-10	0.034	0.61	0.13	0.056	0.59	4e-23
B4GALT4	grey	-0.072	0.28	0.072	0.28	-0.099	0.13	0.0093	0.89	-0.0011	0.99	0.22	0.00063	-0.064	0.34	-0.045	0.5	-0.023	0.73	-0.0043	0.95	-0.088	0.18	-0.1	0.12
B4GALT5	grey	0.45	5.4e-13	-0.45	5.4e-13	0.17	0.0092	0.33	5e-07	0.37	1e-08	-0.21	0.0012	-0.33	4.8e-07	-0.13	0.056	-0.093	0.16	-0.12	0.061	-0.29	1e-05	-0.4	2.5e-10
BAG4	grey	-0.2	0.003	0.2	0.003	-0.22	0.00063	-0.11	0.1	-0.23	0.00045	0.45	4.8e-13	0.2	0.003	0.022	0.75	-0.14	0.041	0.027	0.68	0.076	0.25	0.11	0.097
BAMBI	grey	-0.31	2.4e-06	0.31	2.4e-06	-0.13	0.045	0.13	0.044	-0.28	2.1e-05	0.18	0.0064	0.35	5.7e-08	0.17	0.0093	-0.17	0.0089	0.13	0.057	0.17	0.01	0.29	9.6e-06
BBOX1	grey	0.18	0.0064	-0.18	0.0064	0.12	0.076	-0.013	0.85	0.43	1.1e-11	-0.31	1.4e-06	-0.14	0.034	-0.17	0.0099	-0.29	7.9e-06	-0.32	8.9e-07	-0.096	0.15	0.27	3.8e-05
BBS12	grey	-0.23	0.00035	0.23	0.00035	-0.081	0.22	-0.15	0.028	-0.51	2.8e-16	0.22	0.00078	0.48	1.8e-14	0.51	3.5e-16	0.079	0.23	0.39	1.4e-09	0.26	6.1e-05	0.11	0.099
BCAR3	grey	-0.12	0.064	0.12	0.064	0.035	0.6	-0.15	0.024	-0.41	2e-10	0.22	0.00098	0.58	4.1e-22	0.34	1.3e-07	-0.14	0.039	0.24	0.00034	0.2	0.0021	0.35	4.1e-08
BCHE	grey	-0.14	0.03	0.14	0.03	-0.029	0.67	0.055	0.41	-0.13	0.042	0.075	0.26	0.15	0.027	0.16	0.016	-0.15	0.024	-0.026	0.7	-0.087	0.19	0.064	0.33
BCL11B	grey	-0.44	1.9e-12	0.44	1.9e-12	-0.34	1.8e-07	-0.44	2e-12	-0.36	2e-08	0.27	2.7e-05	0.41	1.8e-10	0.17	0.011	0.22	0.0011	0.27	5e-05	0.39	1.8e-09	0.48	1e-14
BCL2L10	grey	-0.24	0.00027	0.24	0.00027	-0.17	0.01	-0.2	0.0023	-0.0073	0.91	0.24	0.0002	0.22	0.00071	-0.12	0.07	-0.33	2.2e-07	-0.14	0.038	0.018	0.79	0.5	1.5e-15
BCO2	grey	0.23	0.00041	-0.23	0.00041	0.16	0.018	0.12	0.079	0.33	2.9e-07	-0.25	0.00019	-0.27	3e-05	-0.27	4.1e-05	0.011	0.87	-0.18	0.0078	-0.067	0.32	-0.026	0.7
BDKRB1	grey	0.078	0.24	-0.078	0.24	-0.043	0.52	-0.12	0.062	0.28	1.9e-05	-0.046	0.49	0.11	0.11	-0.21	0.0012	-0.45	5.5e-13	-0.34	1.3e-07	-0.11	0.09	0.49	4.1e-15
BEX2	grey	0.24	0.00022	-0.24	0.00022	0.081	0.22	0.35	5.9e-08	0.21	0.0018	-0.028	0.67	-0.49	7.3e-15	-0.25	0.00014	0.15	0.022	-0.17	0.011	-0.33	2.2e-07	-0.59	1.2e-22
BEX3	grey	-0.58	1.1e-21	0.58	1.1e-21	-0.11	0.092	-0.13	0.047	-0.47	5.5e-14	0.23	0.00052	0.55	2.1e-19	0.47	4.6e-14	-0.21	0.0014	0.2	0.0025	0.22	0.00068	0.41	1.4e-10
BEX5	grey	0.22	0.0011	-0.22	0.0011	0.071	0.28	0.42	3.9e-11	0.085	0.2	-0.14	0.04	-0.28	1.4e-05	-0.072	0.28	0.23	0.00058	-0.071	0.28	-0.22	0.00067	-0.45	8e-13
BHLHE40	grey	0.055	0.41	-0.055	0.41	-0.23	0.00039	0.0065	0.92	0.1	0.13	0.18	0.0055	-0.026	0.69	-0.11	0.11	-0.1	0.12	-0.051	0.45	-0.029	0.66	-0.021	0.75
BICD2	grey	-0.34	1.9e-07	0.34	1.9e-07	-0.21	0.0013	-0.32	5.3e-07	-0.091	0.17	0.26	7.9e-05	0.4	6.1e-10	0.093	0.16	-0.36	1.7e-08	-0.08	0.23	0.11	0.11	0.65	3.6e-29
BIK	grey	-0.19	0.0037	0.19	0.0037	-0.22	0.0011	0.07	0.29	-0.27	4.9e-05	0.39	1.7e-09	0.23	0.00045	0.059	0.37	0.0071	0.91	0.12	0.067	0.15	0.025	0.062	0.35
BIRC2	grey	-0.24	0.00032	0.24	0.00032	-0.042	0.53	-0.081	0.22	-0.38	2e-09	0.15	0.021	0.39	1.8e-09	0.33	2.3e-07	0.027	0.68	0.29	1.1e-05	0.17	0.009	0.17	0.0092
BLMH	grey	-0.016	0.82	0.016	0.82	-0.041	0.54	-0.089	0.18	0.17	0.0099	-0.0071	0.91	-0.13	0.048	-0.14	0.038	-0.1	0.13	-0.19	0.004	-0.13	0.044	0.087	0.19
BMP7	grey	0.23	0.00051	-0.23	0.00051	0.0059	0.93	0.13	0.053	0.49	2.8e-15	-0.05	0.46	-0.44	2.9e-12	-0.4	2.1e-10	-0.29	9.5e-06	-0.45	5.8e-13	-0.4	5.1e-10	-0.13	0.054
BMPR1B	grey	-0.36	3.1e-08	0.36	3.1e-08	0.019	0.78	0.042	0.53	-0.45	1.6e-12	0.12	0.067	0.64	6.7e-28	0.4	3.9e-10	-0.3	3.9e-06	0.15	0.024	0.22	0.0011	0.49	2.1e-15
BMS1P1	grey	-0.068	0.31	0.068	0.31	-0.27	3.1e-05	0.053	0.43	-0.13	0.055	0.23	0.00042	0.0015	0.98	-0.075	0.26	0.18	0.0072	0.0069	0.92	0.07	0.29	-0.11	0.1
BNIP3	grey	-0.23	0.00058	0.23	0.00058	0.015	0.82	-0.14	0.041	-0.12	0.065	0.047	0.48	0.45	5e-13	0.14	0.034	-0.45	1.5e-12	-0.12	0.066	0.036	0.59	0.63	7.5e-27
BOD1L1	grey	0.079	0.23	-0.079	0.23	-0.018	0.79	0.05	0.46	-0.056	0.4	0.014	0.83	0.05	0.45	0.067	0.31	0.021	0.76	0.015	0.82	-0.065	0.33	-0.03	0.65
BOK	grey	0.0036	0.96	-0.0036	0.96	-0.068	0.31	-0.16	0.014	0.22	0.00081	-0.091	0.17	0.2	0.0025	0.012	0.86	-0.49	6.8e-15	-0.27	3.8e-05	-0.16	0.013	0.53	5.4e-18
BPGM	grey	0.0067	0.92	-0.0067	0.92	-0.018	0.79	-0.23	0.00061	0.0034	0.96	0.02	0.77	0.28	1.4e-05	0.13	0.05	-0.17	0.0093	0.0089	0.89	0.038	0.57	0.36	3e-08
BPIFA2	grey	0.1	0.13	-0.1	0.13	0.32	1.1e-06	0.2	0.002	0.031	0.65	-0.24	0.00023	-0.1	0.13	-0.026	0.7	-0.026	0.7	-0.11	0.086	-0.079	0.24	-0.13	0.051
BPIFC	grey	-0.26	8.6e-05	0.26	8.6e-05	-0.046	0.49	-0.2	0.0023	0.11	0.11	-0.18	0.0057	0.094	0.16	-0.029	0.66	-0.12	0.064	-0.11	0.094	0.12	0.081	0.49	2.7e-15
BRI3BP	grey	0.096	0.15	-0.096	0.15	-0.35	6.2e-08	-0.19	0.0042	0.22	0.001	0.45	1.4e-12	-0.3	3.2e-06	-0.59	1.3e-22	0.11	0.089	-0.21	0.0019	-0.097	0.14	-0.061	0.36
BSG	grey	-0.46	1.4e-13	0.46	1.4e-13	-0.28	1.6e-05	-0.18	0.0066	-0.52	1.9e-17	0.44	2e-12	0.62	7.1e-26	0.26	7.4e-05	-0.14	0.041	0.27	3.3e-05	0.38	2.5e-09	0.47	5.2e-14
BTBD3	grey	-0.11	0.092	0.11	0.092	0.066	0.32	0.15	0.026	-0.13	0.045	0.066	0.32	0.13	0.043	0.16	0.015	-0.3	4e-06	-0.0083	0.9	-0.071	0.29	0.024	0.72
BTG2	grey	-0.19	0.005	0.19	0.005	-0.049	0.46	0.056	0.4	-0.11	0.1	-0.066	0.32	-0.18	0.0079	-0.028	0.68	0.44	2.1e-12	0.19	0.0035	0.1	0.12	-0.28	1.8e-05
BTG3	grey	-0.59	4.5e-23	0.59	4.5e-23	-0.42	6e-11	-0.37	6.5e-09	-0.37	9.6e-09	0.51	1.8e-16	0.36	2.3e-08	0.072	0.28	-0.096	0.15	0.19	0.0049	0.37	1e-08	0.44	3.6e-12
BTNL9	grey	0.26	7.4e-05	-0.26	7.4e-05	0.12	0.077	0.093	0.16	0.13	0.057	-0.039	0.56	-0.49	5.7e-15	-0.28	2.1e-05	0.32	6.3e-07	-0.1	0.12	-0.15	0.021	-0.63	1.8e-26
C11orf45	grey	0.2	0.0023	-0.2	0.0023	0.11	0.1	-0.021	0.75	0.21	0.0012	-0.035	0.6	0.012	0.85	-0.093	0.16	-0.38	2.7e-09	-0.29	6.4e-06	-0.24	0.00023	0.2	0.0026
C11orf52	grey	0.47	8.2e-14	-0.47	8.2e-14	0.31	2.1e-06	0.58	1.8e-21	0.57	8.3e-21	-0.34	1.3e-07	-0.48	9.8e-15	-0.39	1.1e-09	-0.41	1.7e-10	-0.61	3.3e-24	-0.51	7.9e-17	-0.27	2.8e-05
C11orf80	grey	0.19	0.0039	-0.19	0.0039	-0.18	0.0078	-0.028	0.67	0.21	0.0018	0.098	0.14	-0.15	0.021	-0.3	4.7e-06	-0.13	0.053	-0.31	2.6e-06	-0.18	0.0066	0.018	0.79
C12orf56	grey	-0.22	0.00072	0.22	0.00072	-0.21	0.0018	-0.26	8.4e-05	0.013	0.85	0.31	2.1e-06	0.051	0.44	-0.17	0.01	-0.23	0.00048	-0.2	0.003	-0.049	0.46	0.27	4e-05
C17orf97	grey	0.27	3.9e-05	-0.27	3.9e-05	0.14	0.039	0.21	0.0014	0.39	7e-10	-0.24	0.0002	-0.32	6.6e-07	-0.2	0.003	-0.2	0.0024	-0.33	3.9e-07	-0.33	4.5e-07	-0.16	0.013
C17orf99	grey	-0.21	0.0013	0.21	0.0013	-0.22	0.0009	-0.17	0.0091	-0.27	4.4e-05	0.34	1.1e-07	0.07	0.3	-0.031	0.65	0.13	0.043	0.21	0.0014	0.19	0.0033	-0.098	0.14
C1GALT1	grey	0.54	9.4e-19	-0.54	9.4e-19	0.079	0.23	0.34	2.2e-07	0.34	2e-07	-0.19	0.0044	-0.19	0.0048	-0.22	0.00087	-0.2	0.0025	-0.28	1.4e-05	-0.34	1.1e-07	-0.18	0.0061
C1orf226	grey	-0.11	0.1	0.11	0.1	-0.26	5.6e-05	-0.0062	0.93	-0.0045	0.95	0.18	0.0077	0.058	0.39	-0.16	0.017	-0.13	0.054	-0.031	0.65	0.1	0.11	0.21	0.0012
C1orf74	grey	-0.34	1.9e-07	0.34	1.9e-07	-0.28	2.1e-05	-0.28	2.3e-05	-0.36	2e-08	0.41	1.3e-10	0.6	4.1e-24	0.18	0.0058	-0.28	2e-05	0.15	0.022	0.31	1.8e-06	0.57	3e-21
C1QTNF12	grey	-0.24	0.00026	0.24	0.00026	-0.11	0.094	-0.16	0.015	-0.2	0.0022	0.27	4.7e-05	0.29	9e-06	0.13	0.058	-0.22	0.00063	-0.0042	0.95	0.03	0.65	0.25	0.00012
C1QTNF2	grey	0.17	0.0083	-0.17	0.0083	0.46	1.8e-13	0.11	0.099	0.25	0.0001	-0.51	3.7e-16	-0.27	4.5e-05	0.17	0.0086	-0.13	0.049	-0.23	0.00058	-0.25	0.0001	-0.23	0.00042
C21orf91	grey	-0.29	1.1e-05	0.29	1.1e-05	-0.26	7.8e-05	-0.31	2e-06	-0.09	0.18	0.26	6.7e-05	0.00095	0.99	-0.1	0.12	0.15	0.026	0.091	0.17	0.28	1.5e-05	0.15	0.023
C2CD2	grey	-0.0065	0.92	0.0065	0.92	-0.045	0.5	0.12	0.082	0.057	0.4	-0.15	0.023	-0.21	0.0018	-0.08	0.23	0.21	0.0018	0.085	0.2	0.051	0.44	-0.21	0.0011
C2orf74	grey	0.03	0.65	-0.03	0.65	0.15	0.028	0.039	0.56	-0.06	0.37	-0.11	0.09	-0.012	0.86	0.11	0.11	0.14	0.032	0.095	0.15	0.052	0.43	-0.094	0.16
C2orf76	grey	0.13	0.056	-0.13	0.056	-0.027	0.69	0.1	0.12	0.24	0.00034	-0.0043	0.95	-0.034	0.61	-0.11	0.086	-0.48	2.3e-14	-0.44	2.3e-12	-0.47	6.5e-14	0.15	0.02
C3orf14	grey	0.42	4.9e-11	-0.42	4.9e-11	0.086	0.2	0.24	0.00028	0.38	4.3e-09	-0.15	0.024	-0.44	5.3e-12	-0.25	0.00018	-0.036	0.59	-0.26	5.6e-05	-0.41	1.8e-10	-0.46	3.2e-13
C3orf70	grey	-0.098	0.14	0.098	0.14	0.065	0.33	0.28	1.3e-05	-0.047	0.48	0.039	0.56	-0.14	0.031	0.12	0.063	0.0032	0.96	-0.076	0.25	-0.12	0.06	-0.31	1.9e-06
C3orf80	grey	0.065	0.33	-0.065	0.33	0.065	0.33	-0.008	0.9	-0.13	0.048	0.054	0.42	0.23	0.00052	0.47	9.4e-14	-0.21	0.0018	0.12	0.08	-0.13	0.056	-0.034	0.61
C4B	grey	-0.24	0.0002	0.24	0.0002	0.21	0.0014	0.079	0.24	-0.29	8.3e-06	-0.24	0.00024	-0.017	0.8	0.35	3.8e-08	0.53	5.5e-18	0.42	4e-11	0.28	1.7e-05	-0.3	3.6e-06
C5	grey	0.054	0.42	-0.054	0.42	-0.031	0.64	-0.029	0.67	0.0083	0.9	0.27	3.6e-05	-0.3	5.8e-06	-0.13	0.053	0.14	0.04	-0.028	0.68	-0.051	0.44	-0.44	3.9e-12
C5orf46	grey	-0.19	0.0033	0.19	0.0033	0.034	0.61	0.1	0.12	-0.19	0.0042	-0.18	0.0073	0.2	0.002	0.37	1.2e-08	-0.12	0.074	0.076	0.25	0.031	0.64	0.13	0.054
C6orf15	grey	-0.2	0.003	0.2	0.003	0.0069	0.92	-0.089	0.18	-0.03	0.66	0.0021	0.97	0.042	0.53	0.022	0.75	-0.038	0.57	-0.043	0.52	0.06	0.37	0.14	0.03
C8orf82	grey	0.22	0.00068	-0.22	0.00068	0.047	0.48	0.28	2.5e-05	0.25	0.00011	-0.081	0.22	-0.099	0.14	-0.14	0.034	-0.42	2.5e-11	-0.36	1.9e-08	-0.35	4.7e-08	-0.016	0.82
C8orf88	grey	0.03	0.65	-0.03	0.65	0.16	0.016	0.073	0.27	-0.068	0.31	-0.074	0.26	-0.029	0.66	0.29	8.6e-06	-0.027	0.68	-0.013	0.84	-0.19	0.0036	-0.29	1.2e-05
CA12	grey	0.11	0.084	-0.11	0.084	-0.014	0.83	0.19	0.005	0.3	4.8e-06	-0.17	0.0095	0.089	0.18	-0.12	0.062	-0.49	4.2e-15	-0.39	1.3e-09	-0.26	5.9e-05	0.42	2.3e-11
CA2	grey	-0.46	2.1e-13	0.46	2.1e-13	-0.2	0.0019	-0.13	0.051	-0.37	6.7e-09	0.24	0.00023	0.6	2.5e-23	0.23	0.00058	-0.17	0.012	0.26	5.1e-05	0.43	1.1e-11	0.66	8.8e-30
CA9	grey	-0.33	2.9e-07	0.33	2.9e-07	-0.2	0.0024	-0.18	0.0051	-0.44	2.5e-12	0.46	1.5e-13	0.51	2.8e-16	0.22	0.00078	-0.18	0.0066	0.18	0.0052	0.22	0.00084	0.33	5.1e-07
CABYR	grey	-0.35	4.3e-08	0.35	4.3e-08	-0.17	0.012	-0.11	0.087	-0.43	1.1e-11	0.36	1.5e-08	0.37	5.9e-09	0.21	0.0014	-0.088	0.19	0.2	0.0027	0.15	0.028	0.18	0.0073
CACNA2D3	grey	-0.39	1.5e-09	0.39	1.5e-09	-0.17	0.01	-0.26	9.8e-05	-0.37	5.4e-09	0.22	0.00084	0.46	1.6e-13	0.36	2.2e-08	-0.13	0.055	0.19	0.0034	0.17	0.0083	0.36	1.4e-08
CADPS2	grey	-0.079	0.24	0.079	0.24	0.21	0.0018	0.53	9.1e-18	-0.16	0.015	-0.21	0.0014	-0.12	0.066	0.34	1.2e-07	0.14	0.031	0.13	0.047	0.013	0.85	-0.5	3.9e-16
CALB1	grey	-0.23	0.00054	0.23	0.00054	-0.12	0.069	-0.11	0.087	-0.22	0.0011	0.26	8.6e-05	0.2	0.0029	0.091	0.17	0.028	0.67	0.19	0.0049	0.15	0.024	0.11	0.087
CALCRL	grey	-0.16	0.015	0.16	0.015	0.16	0.018	-0.0039	0.95	-0.22	0.001	-0.04	0.54	0.29	9.2e-06	0.34	1.3e-07	-0.12	0.068	0.2	0.0027	0.036	0.59	0.17	0.01
CALML5	grey	-0.023	0.73	0.023	0.73	-0.057	0.4	-0.12	0.081	0.37	9.6e-09	-0.1	0.13	-0.27	3.5e-05	-0.28	2.1e-05	-0.05	0.46	-0.22	0.00077	-0.0011	0.99	0.14	0.034
CAMK1D	grey	0.37	1.2e-08	-0.37	1.2e-08	0.11	0.09	0.2	0.0022	0.53	4.9e-18	-0.46	2.4e-13	-0.53	5.9e-18	-0.2	0.0028	0.055	0.41	-0.34	1.1e-07	-0.31	1.3e-06	-0.34	1.2e-07
CAMK2N1	grey	0.36	3e-08	-0.36	3e-08	0.11	0.089	0.043	0.52	0.12	0.073	-0.13	0.047	0.13	0.042	0.12	0.081	-0.23	0.00046	-0.082	0.22	-0.23	0.00036	0.062	0.35
CARD18	grey	-0.28	2e-05	0.28	2e-05	-0.019	0.78	-0.2	0.0027	-0.033	0.62	-0.11	0.11	0.21	0.0016	0.1	0.13	-0.075	0.26	0.089	0.18	0.2	0.0028	0.47	6.6e-14
CARD6	grey	0.12	0.066	-0.12	0.066	0.073	0.27	0.058	0.38	0.31	2e-06	-0.35	7.7e-08	0.03	0.65	-0.073	0.27	-0.29	7e-06	-0.22	0.00068	-0.094	0.16	0.37	8.6e-09
CARMN	grey	0.055	0.41	-0.055	0.41	0.46	2.3e-13	0.32	8.6e-07	-0.09	0.18	-0.47	7.7e-14	0.056	0.4	0.55	3.7e-19	-0.087	0.19	0.01	0.88	-0.19	0.0037	-0.23	0.0005
CASP14	grey	-0.2	0.0025	0.2	0.0025	-0.12	0.073	-0.19	0.0044	-0.071	0.29	-0.012	0.86	0.22	0.00069	0.042	0.53	-0.073	0.27	0.057	0.4	0.23	0.00053	0.43	1.6e-11
CBLN2	grey	-0.14	0.032	0.14	0.032	-0.14	0.032	-0.082	0.22	-0.17	0.0083	0.18	0.0067	-0.11	0.093	0.035	0.6	0.3	2.7e-06	0.24	0.00026	0.16	0.015	-0.3	3.7e-06
CBR1	grey	0.078	0.24	-0.078	0.24	-0.041	0.54	0.04	0.54	0.36	2.8e-08	-0.05	0.46	-0.24	0.00032	-0.27	3.2e-05	-0.29	7.8e-06	-0.36	1.5e-08	-0.22	0.00078	0.11	0.084
CBS	grey	-0.21	0.0013	0.21	0.0013	-0.14	0.039	0.087	0.19	-0.29	6.2e-06	0.39	9.6e-10	0.0092	0.89	0.041	0.54	0.058	0.39	0.11	0.094	0.078	0.24	-0.28	2e-05
CCDC113	grey	-0.13	0.05	0.13	0.05	0.03	0.65	0.045	0.5	-0.22	0.00062	0.15	0.022	0.34	1.9e-07	0.18	0.0079	-0.3	3e-06	-0.059	0.38	-0.026	0.7	0.22	0.00063
CCDC146	grey	0.008	0.9	-0.008	0.9	-0.075	0.26	0.011	0.87	0.11	0.087	0.079	0.23	-0.35	4.4e-08	-0.21	0.0014	0.1	0.12	-0.13	0.057	-0.044	0.51	-0.34	1.1e-07
CCDC186	grey	0.32	8.5e-07	-0.32	8.5e-07	0.017	0.8	0.2	0.0028	0.41	9.4e-11	-0.22	0.00067	-0.23	0.00056	-0.25	0.00015	-0.18	0.0057	-0.29	6.6e-06	-0.27	4e-05	0.024	0.72
CCDC190	grey	-0.12	0.075	0.12	0.075	-0.097	0.14	-0.0063	0.92	0.0054	0.93	0.23	0.00049	-0.0035	0.96	-0.16	0.016	-0.08	0.23	-0.057	0.39	0.0044	0.95	0.071	0.29
CCDC3	grey	-0.24	0.00029	0.24	0.00029	0.26	8.3e-05	0.015	0.83	-0.18	0.0062	-0.29	6.3e-06	0.28	1.8e-05	0.52	4.8e-17	-0.2	0.0021	0.069	0.3	-0.0027	0.97	0.2	0.0023
CCDC68	grey	-0.068	0.31	0.068	0.31	0.034	0.61	0.094	0.16	-0.18	0.0059	0.13	0.058	0.2	0.003	0.17	0.011	-0.058	0.38	0.044	0.51	0.085	0.2	-0.0017	0.98
CCDC74B	grey	0.08	0.23	-0.08	0.23	-0.02	0.77	0.071	0.29	-0.008	0.9	0.15	0.023	-0.22	0.00067	-0.007	0.92	-0.031	0.64	-0.046	0.49	-0.15	0.028	-0.44	2.8e-12
CCDC8	grey	-0.33	3.2e-07	0.33	3.2e-07	0.016	0.81	-0.12	0.064	-0.51	2.4e-16	0.23	0.00042	0.42	6.5e-11	0.54	8.3e-19	-0.078	0.24	0.21	0.0012	0.13	0.051	0.024	0.72
CCDC91	grey	-0.34	2.2e-07	0.34	2.2e-07	-0.27	2.7e-05	-0.22	0.00079	-0.53	7.3e-18	0.4	4e-10	0.39	1.6e-09	0.25	0.00016	0.31	1.3e-06	0.43	1.6e-11	0.37	7.6e-09	0.073	0.27
CCL21	grey	0.31	1.6e-06	-0.31	1.6e-06	0.25	0.00013	0.079	0.23	0.24	0.00028	-0.37	5.9e-09	-0.32	8e-07	-0.13	0.054	0.38	2.2e-09	-0.025	0.71	-0.11	0.1	-0.32	8.4e-07
CCL22	grey	-0.13	0.051	0.13	0.051	-0.093	0.16	-0.16	0.018	-0.071	0.29	-0.1	0.12	0.061	0.36	0.044	0.51	0.34	1.3e-07	0.33	5e-07	0.27	4e-05	0.14	0.038
CCL26	grey	-0.049	0.46	0.049	0.46	-0.12	0.082	-0.014	0.83	0.067	0.31	0.0046	0.94	0.023	0.73	-0.023	0.72	-0.14	0.031	-0.064	0.34	-0.077	0.25	0.14	0.029
CCN3	grey	0.021	0.75	-0.021	0.75	0.092	0.17	0.057	0.39	0.11	0.094	-0.048	0.47	-0.18	0.0051	-0.00014	1	-0.096	0.15	-0.18	0.0066	-0.18	0.0068	-0.18	0.0079
CCN5	grey	-0.13	0.052	0.13	0.052	0.27	4.7e-05	0.052	0.44	-0.043	0.52	-0.38	2.9e-09	-0.031	0.64	0.47	6.2e-14	0.06	0.37	0.14	0.038	0.0091	0.89	-0.16	0.018
CCN6	grey	-0.25	0.00013	0.25	0.00013	-0.068	0.3	-0.099	0.14	-0.26	9.2e-05	0.1	0.12	0.42	6.3e-11	0.25	0.00014	-0.19	0.0049	0.039	0.56	0.065	0.33	0.36	2.5e-08
CCNA1	grey	-0.3	4.4e-06	0.3	4.4e-06	-0.049	0.47	-0.16	0.015	-0.42	2.8e-11	0.24	0.00033	0.54	9.1e-19	0.32	5.7e-07	-0.11	0.089	0.3	3.3e-06	0.19	0.0034	0.39	8.8e-10
CCND1	grey	0.17	0.0084	-0.17	0.0084	0.091	0.17	0.16	0.017	0.071	0.29	-0.071	0.29	0.1	0.13	0.012	0.85	-0.29	7.2e-06	-0.18	0.0056	-0.2	0.002	0.045	0.5
CCNL1	grey	-0.36	3e-08	0.36	3e-08	-0.41	1.8e-10	-0.2	0.002	-0.29	9.7e-06	0.43	1.9e-11	0.23	0.00059	0.0066	0.92	0.15	0.028	0.27	4.4e-05	0.31	1.4e-06	0.17	0.0082
CCNYL1	grey	0.4	2.4e-10	-0.4	2.4e-10	-0.11	0.097	0.055	0.41	0.36	3.4e-08	-0.024	0.72	0.0022	0.97	-0.22	0.00082	-0.26	5.4e-05	-0.19	0.0048	-0.2	0.0021	0.21	0.0017
CCPG1	grey	0.059	0.37	-0.059	0.37	0.24	0.00023	0.54	2.1e-18	-0.014	0.84	-0.37	8.3e-09	-0.34	1.1e-07	0.18	0.0062	0.39	9.2e-10	0.14	0.029	-0.11	0.1	-0.63	1.1e-26
CD177	grey	-0.16	0.018	0.16	0.018	-0.15	0.023	-0.11	0.11	0.12	0.083	-0.078	0.24	-0.07	0.29	-0.12	0.06	0.1	0.13	0.033	0.62	0.13	0.042	0.18	0.0062
CD1A	grey	0.31	1.2e-06	-0.31	1.2e-06	0.066	0.32	0.078	0.24	0.45	7.8e-13	-0.21	0.0018	-0.36	2.4e-08	-0.31	1.7e-06	-0.14	0.03	-0.37	6.4e-09	-0.23	0.00035	-0.082	0.22
CD1E	grey	0.41	1.3e-10	-0.41	1.3e-10	0.0053	0.94	0.0072	0.91	0.45	1.2e-12	-0.21	0.0014	-0.52	3.4e-17	-0.41	1.2e-10	0.32	1.1e-06	-0.19	0.0034	-0.15	0.02	-0.28	1.4e-05
CD207	grey	0.42	3.5e-11	-0.42	3.5e-11	0.1	0.13	0.16	0.013	0.56	1.4e-20	-0.3	3.3e-06	-0.43	1.7e-11	-0.37	9e-09	-0.23	0.00036	-0.53	4.2e-18	-0.39	6.4e-10	-0.1	0.12
CD36	grey	0.048	0.47	-0.048	0.47	0.47	5.4e-14	0.1	0.12	0.22	0.00065	-0.47	4.7e-14	-0.14	0.032	0.081	0.22	-0.19	0.005	-0.17	0.0097	-0.17	0.0086	0.059	0.38
CD46	grey	0.41	1.8e-10	-0.41	1.8e-10	-0.096	0.15	0.29	6.3e-06	0.32	8.3e-07	0.1	0.13	-0.43	1.9e-11	-0.42	2.4e-11	-0.0039	0.95	-0.24	0.00026	-0.28	2.3e-05	-0.41	7.9e-11
CD55	grey	0.13	0.053	-0.13	0.053	0.012	0.86	0.25	0.00014	0.33	3.3e-07	-0.31	2.1e-06	-0.14	0.032	-0.081	0.22	-0.21	0.0014	-0.26	7.7e-05	-0.3	5.8e-06	0.057	0.39
CD59	grey	0.19	0.0037	-0.19	0.0037	0.18	0.0064	0.062	0.35	-0.0031	0.96	-0.19	0.005	0.2	0.0022	0.22	0.00076	-0.19	0.0035	0.016	0.81	-0.14	0.033	0.089	0.18
CDA	grey	0.16	0.018	-0.16	0.018	0.1	0.12	-0.069	0.3	0.3	5.6e-06	-0.3	3.8e-06	0.18	0.0054	-0.014	0.83	-0.41	6.6e-11	-0.23	0.00052	-0.094	0.16	0.54	1.2e-18
CDC42EP1	grey	-0.0087	0.9	0.0087	0.9	-0.17	0.012	0.059	0.38	0.088	0.19	0.078	0.24	0.1	0.12	-0.074	0.26	-0.26	6.7e-05	-0.087	0.19	-0.029	0.67	0.2	0.0024
CDC42EP5	grey	0.29	9.8e-06	-0.29	9.8e-06	0.17	0.0093	0.59	6.7e-23	0.22	0.00065	-0.39	1.1e-09	-0.28	1.3e-05	0.072	0.28	-0.02	0.76	-0.15	0.021	-0.35	5e-08	-0.47	3.7e-14
CDCA7L	grey	0.034	0.61	-0.034	0.61	-0.085	0.2	-0.064	0.33	-0.082	0.22	0.38	2.1e-09	0.056	0.4	-0.075	0.26	-0.22	0.00068	-0.23	0.00047	-0.25	0.00018	-0.031	0.64
CDH1	grey	-0.026	0.7	0.026	0.7	-0.36	2.1e-08	-0.04	0.55	0.19	0.0034	0.26	5.8e-05	0.11	0.096	-0.32	5.9e-07	-0.36	3.3e-08	-0.29	7.1e-06	-0.023	0.72	0.45	8.2e-13
CDH13	grey	-0.2	0.0027	0.2	0.0027	0.17	0.0099	-0.14	0.037	-0.27	3.8e-05	0.01	0.88	0.49	1.7e-15	0.41	9.8e-11	-0.4	3.2e-10	-0.0032	0.96	-0.012	0.86	0.4	2.7e-10
CDH16	grey	0.084	0.21	-0.084	0.21	0.044	0.51	0.021	0.75	0.26	6.8e-05	-0.042	0.53	0.017	0.8	-0.16	0.019	-0.35	9e-08	-0.22	0.00087	-0.14	0.034	0.3	2.9e-06
CDH2	grey	-0.2	0.0026	0.2	0.0026	0.028	0.67	-0.099	0.14	-0.42	2.6e-11	0.13	0.046	0.47	6.6e-14	0.54	2e-18	-0.079	0.23	0.22	0.00087	0.016	0.81	0.12	0.06
CDH5	grey	-0.058	0.39	0.058	0.39	0.48	1.6e-14	0.089	0.18	-0.038	0.57	-0.49	2.4e-15	0.07	0.29	0.39	8.7e-10	0.011	0.87	0.13	0.045	-0.056	0.4	-0.04	0.55
CDHR1	grey	-0.18	0.0062	0.18	0.0062	-0.048	0.47	-0.19	0.0041	0.073	0.27	-0.058	0.38	0.17	0.0087	0.0089	0.89	-0.38	2.6e-09	-0.27	4.1e-05	-0.08	0.23	0.47	4.2e-14
CDK18	grey	-0.41	1.4e-10	0.41	1.4e-10	-0.13	0.059	-0.2	0.0027	-0.47	4.6e-14	0.32	6.6e-07	0.44	3.4e-12	0.22	0.0011	-0.01	0.88	0.3	4.7e-06	0.39	1e-09	0.23	0.00039
CDK5R1	grey	-0.22	0.00066	0.22	0.00066	-0.33	3.4e-07	-0.33	4.4e-07	-0.088	0.19	0.23	0.00044	0.41	1.3e-10	0.0033	0.96	-0.12	0.067	0.025	0.7	0.21	0.0012	0.66	9.2e-30
CDK7	grey	0.35	6.1e-08	-0.35	6.1e-08	-0.048	0.47	-0.054	0.42	0.48	3.1e-14	-0.1	0.11	-0.085	0.2	-0.36	1.5e-08	-0.36	1.5e-08	-0.38	2e-09	-0.2	0.0023	0.36	1.7e-08
CDKN1A	grey	-0.51	3.1e-16	0.51	3.1e-16	-0.28	1.6e-05	-0.41	1.8e-10	-0.29	7.3e-06	0.34	1.9e-07	0.58	7.1e-22	0.22	0.00075	-0.31	2.3e-06	0.18	0.0071	0.32	9e-07	0.69	1.2e-33
CDKN1C	grey	-0.12	0.071	0.12	0.071	0.28	2.3e-05	0.12	0.081	-0.11	0.093	-0.15	0.028	-0.053	0.43	0.34	1.1e-07	-0.031	0.65	-0.028	0.67	-0.099	0.14	-0.29	8.7e-06
CDKN2B	grey	0.19	0.0043	-0.19	0.0043	-0.056	0.4	-0.12	0.077	0.26	5.5e-05	0.018	0.79	-0.05	0.45	-0.16	0.015	-0.21	0.0019	-0.24	0.00029	-0.076	0.25	0.17	0.013
CDKN2C	grey	0.19	0.0042	-0.19	0.0042	-0.029	0.66	0.0065	0.92	0.25	0.00011	0.2	0.0023	-0.52	4.2e-17	-0.35	4.2e-08	0.099	0.13	-0.25	0.00013	-0.2	0.0024	-0.51	1.2e-16
CDO1	grey	0.21	0.0013	-0.21	0.0013	0.51	1.3e-16	0.42	5.3e-11	0.19	0.0032	-0.59	4.5e-23	-0.36	1.9e-08	0.2	0.0019	0.11	0.11	-0.13	0.056	-0.29	9e-06	-0.48	2.8e-14
CDR2L	grey	-0.43	7e-12	0.43	7e-12	-0.12	0.067	-0.093	0.16	-0.46	1.6e-13	0.2	0.002	0.57	2e-21	0.51	1.4e-16	-0.24	0.00022	0.28	2.4e-05	0.16	0.016	0.39	1.7e-09
CDSN	grey	-0.4	4.1e-10	0.4	4.1e-10	-0.086	0.2	-0.24	0.0003	-0.077	0.25	-0.094	0.16	0.32	6.2e-07	0.079	0.24	-0.11	0.094	0.05	0.46	0.25	0.00011	0.65	2.3e-28
CEBPA	grey	0.03	0.65	-0.03	0.65	-0.13	0.042	-0.04	0.55	0.4	3.7e-10	-0.13	0.049	-0.32	1.1e-06	-0.36	3.5e-08	-0.08	0.23	-0.24	0.00021	-0.096	0.15	0.14	0.037
CEBPD	grey	-0.58	1.1e-21	0.58	1.1e-21	-0.24	0.00021	-0.25	0.00016	-0.52	6.5e-17	0.29	1.2e-05	0.5	1.4e-15	0.36	1.6e-08	0.11	0.1	0.52	4.7e-17	0.46	1.7e-13	0.35	5.1e-08
CEL	grey	0.39	6.2e-10	-0.39	6.2e-10	-0.018	0.79	0.25	0.00011	0.47	6.3e-14	-0.071	0.29	-0.52	1.8e-17	-0.41	1.6e-10	-0.11	0.11	-0.34	1.3e-07	-0.35	4e-08	-0.42	2.7e-11
CELP	grey	0.25	0.00012	-0.25	0.00012	-0.058	0.38	0.099	0.14	0.3	2.8e-06	0.027	0.68	-0.28	1.8e-05	-0.35	4.3e-08	-0.2	0.0028	-0.3	4.5e-06	-0.2	0.0022	-0.14	0.033
CELSR2	grey	-0.069	0.3	0.069	0.3	-0.15	0.026	-0.21	0.0017	0.24	0.00021	0.16	0.016	-0.011	0.86	-0.27	3e-05	-0.37	1.2e-08	-0.32	5.7e-07	-0.017	0.8	0.36	2.8e-08
CELSR3	grey	-0.41	1.7e-10	0.41	1.7e-10	-0.14	0.038	-0.32	1.1e-06	-0.39	7.1e-10	0.41	1e-10	0.19	0.0045	0.1	0.13	0.12	0.066	0.24	0.00033	0.25	0.00015	0.064	0.34
CEMIP	grey	-0.5	1.5e-15	0.5	1.5e-15	-0.3	2.7e-06	-0.37	8e-09	-0.48	2.9e-14	0.38	3.6e-09	0.53	2.8e-18	0.3	4.3e-06	0.13	0.054	0.47	3.2e-14	0.36	2e-08	0.41	9.6e-11
CEP76	grey	0.38	2.7e-09	-0.38	2.7e-09	-0.11	0.1	0.034	0.61	0.51	1.3e-16	0.085	0.2	-0.38	2.6e-09	-0.52	2.2e-17	-0.19	0.0031	-0.4	5.7e-10	-0.32	5.5e-07	-0.021	0.75
CES1	grey	0.34	1.5e-07	-0.34	1.5e-07	0.2	0.0019	0.4	3.9e-10	0.36	1.8e-08	-0.39	1.2e-09	-0.33	4.7e-07	-0.14	0.031	-0.18	0.0067	-0.26	5.7e-05	-0.38	4.8e-09	-0.2	0.0022
CFAP300	grey	-0.2	0.002	0.2	0.002	-0.012	0.85	-0.18	0.0073	-0.36	2.7e-08	0.23	0.0004	0.36	2.2e-08	0.34	1.5e-07	-0.085	0.2	0.2	0.0019	0.081	0.22	0.091	0.17
CFI	grey	-0.11	0.1	0.11	0.1	0.074	0.27	0.062	0.35	-0.15	0.022	-0.16	0.016	0.15	0.027	0.39	8.3e-10	0.083	0.21	0.26	5.4e-05	0.17	0.011	-0.037	0.57
CGB1	grey	-0.16	0.016	0.16	0.016	0.083	0.21	-0.093	0.16	-0.32	6.5e-07	0.05	0.45	0.43	1e-11	0.36	3.2e-08	-0.14	0.034	0.14	0.034	0.087	0.19	0.23	0.00035
CH25H	grey	0.14	0.032	-0.14	0.032	-0.021	0.75	0.04	0.55	0.22	0.00071	-0.27	3.3e-05	-0.25	0.00018	-0.035	0.6	0.24	0.00026	0.037	0.58	0.04	0.55	-0.2	0.0025
CHAC2	grey	0.074	0.27	-0.074	0.27	-0.28	1.8e-05	-0.19	0.0048	0.1	0.13	0.31	1.6e-06	0.041	0.53	-0.26	6.1e-05	-0.034	0.61	-0.036	0.58	-0.0023	0.97	0.22	0.00077
CHI3L2	grey	-0.082	0.22	0.082	0.22	-0.11	0.11	-0.063	0.34	-0.16	0.015	-0.037	0.57	-0.037	0.58	0.0083	0.9	0.49	3.8e-15	0.3	3e-06	0.23	0.00042	-0.13	0.054
CHIT1	grey	-0.26	6.6e-05	0.26	6.6e-05	-0.095	0.15	-0.08	0.23	-0.22	0.00065	0.08	0.23	0.082	0.22	0.24	0.00021	0.24	0.00034	0.4	5.2e-10	0.2	0.0024	-0.042	0.53
CHL1	grey	0.1	0.12	-0.1	0.12	0.052	0.43	0.22	0.00072	0.34	1.2e-07	-0.24	0.0002	-0.29	1.1e-05	-0.16	0.019	-0.11	0.1	-0.32	1e-06	-0.26	6.5e-05	-0.087	0.19
CHODL	grey	-0.13	0.054	0.13	0.054	0.0078	0.91	-0.017	0.79	0.07	0.29	-0.077	0.25	-0.12	0.065	-0.032	0.63	-0.08	0.23	-0.19	0.0033	-0.06	0.37	0.037	0.58
CHPT1	grey	0.37	6.2e-09	-0.37	6.2e-09	0.16	0.014	0.46	2.1e-13	0.25	0.00016	-0.23	0.0004	-0.57	3.6e-21	-0.14	0.031	0.33	3.3e-07	-0.057	0.39	-0.29	8.3e-06	-0.78	9.9e-48
CHRNA9	grey	-0.24	0.00028	0.24	0.00028	-0.07	0.3	-0.2	0.0024	-0.082	0.22	-0.022	0.75	0.16	0.013	0.063	0.34	-0.014	0.84	0.037	0.58	0.2	0.0031	0.34	1.9e-07
CHST7	grey	-0.41	8.6e-11	0.41	8.6e-11	-0.059	0.37	-0.2	0.0019	-0.45	1.2e-12	0.27	3e-05	0.39	8.8e-10	0.39	1.6e-09	0.028	0.68	0.35	3.8e-08	0.28	1.8e-05	0.16	0.015
CHURC1	grey	0.0023	0.97	-0.0023	0.97	0.15	0.021	0.057	0.39	-0.17	0.011	-0.022	0.74	0.041	0.54	0.13	0.05	0.15	0.027	0.068	0.31	-0.035	0.6	-0.13	0.043
CIART	grey	0.031	0.64	-0.031	0.64	0.2	0.0024	0.23	0.00036	0.095	0.15	-0.11	0.097	-0.18	0.0067	0.0099	0.88	-0.16	0.013	-0.26	9.4e-05	-0.23	0.00039	-0.24	0.00019
CIDEA	grey	0.33	4.6e-07	-0.33	4.6e-07	0.16	0.016	0.13	0.053	0.41	1.4e-10	-0.28	2.5e-05	-0.29	1.1e-05	-0.22	0.0011	-0.29	9.2e-06	-0.44	6.1e-12	-0.37	5.7e-09	-0.051	0.44
CITED4	grey	-0.13	0.046	0.13	0.046	-0.07	0.29	-0.12	0.076	-0.05	0.45	-0.01	0.88	0.41	1.5e-10	0.039	0.56	-0.38	2.2e-09	-0.078	0.24	0.087	0.19	0.6	4.4e-24
CKB	grey	-0.05	0.45	0.05	0.45	0.14	0.032	-0.049	0.46	0.054	0.42	0.036	0.58	0.12	0.077	-0.034	0.61	-0.33	4.8e-07	-0.23	0.0006	-0.088	0.19	0.23	0.00038
CLC	grey	-0.25	0.00013	0.25	0.00013	0.087	0.19	-0.17	0.0098	-0.35	8.1e-08	0.054	0.41	0.34	1.2e-07	0.37	8.3e-09	0.16	0.017	0.42	2.3e-11	0.29	1.2e-05	0.14	0.034
CLCA2	grey	-0.069	0.3	0.069	0.3	-0.15	0.023	-0.2	0.0021	0.15	0.025	0.057	0.39	0.29	6.9e-06	-0.095	0.15	-0.37	7.7e-09	-0.23	0.00035	0.0074	0.91	0.69	5.6e-34
CLDN1	grey	-0.26	7.3e-05	0.26	7.3e-05	-0.4	3.2e-10	-0.18	0.0065	-0.22	0.00071	0.5	1.5e-15	0.24	0.00027	-0.066	0.32	-0.11	0.086	0.096	0.15	0.21	0.0011	0.22	0.00073
CLDN20	grey	-0.078	0.24	0.078	0.24	-0.034	0.61	-0.034	0.61	0.039	0.55	0.039	0.56	-0.03	0.65	0.018	0.78	-0.15	0.021	-0.16	0.017	-0.19	0.0046	0.011	0.87
CLDN3	grey	0.11	0.085	-0.11	0.085	0.0075	0.91	0.54	1.7e-18	0.057	0.39	-0.066	0.32	-0.35	6.2e-08	-0.17	0.011	0.12	0.065	-0.12	0.06	-0.16	0.014	-0.54	2.4e-18
CLDN5	grey	0.18	0.0072	-0.18	0.0072	0.49	2.4e-15	0.19	0.0031	0.2	0.0021	-0.57	3.3e-21	-0.19	0.0036	0.15	0.027	-0.015	0.82	-0.14	0.036	-0.28	2.4e-05	-0.22	0.00094
CLEC2B	grey	-0.32	5.3e-07	0.32	5.3e-07	-0.11	0.084	-0.37	1e-08	-0.23	0.00039	0.21	0.0014	0.11	0.11	0.029	0.67	0.28	2.2e-05	0.32	1.2e-06	0.43	1.3e-11	0.13	0.044
CLEC5A	grey	-0.34	1.3e-07	0.34	1.3e-07	-0.17	0.012	-0.24	0.00024	-0.42	4.5e-11	0.22	0.00063	0.48	2.1e-14	0.4	2.4e-10	0.01	0.88	0.58	9.8e-22	0.32	7.3e-07	0.3	2.9e-06
CLIC6	grey	0.33	2.5e-07	-0.33	2.5e-07	0.2	0.003	0.54	1e-18	0.31	2e-06	-0.32	1.2e-06	-0.45	6e-13	-0.068	0.31	0.082	0.22	-0.17	0.011	-0.38	3.7e-09	-0.58	7.2e-22
CLK4	grey	0.23	0.00039	-0.23	0.00039	0.081	0.22	0.13	0.045	0.16	0.019	-0.16	0.018	-0.44	2.1e-12	-0.15	0.025	0.36	2.2e-08	-0.035	0.6	-0.13	0.051	-0.53	9e-18
CLSTN1	grey	-0.59	1.5e-22	0.59	1.5e-22	-0.13	0.05	-0.21	0.0018	-0.52	3.5e-17	0.39	8.7e-10	0.51	2.6e-16	0.37	8.2e-09	-0.18	0.0058	0.089	0.18	0.21	0.0017	0.32	5.9e-07
CNN1	grey	0.15	0.028	-0.15	0.028	0.35	7.2e-08	0.58	1.6e-21	-0.011	0.87	-0.45	1.4e-12	0.0027	0.97	0.45	1.6e-12	-0.21	0.0017	-0.067	0.32	-0.37	1.2e-08	-0.28	2.4e-05
CNN3	grey	0.18	0.0059	-0.18	0.0059	0.17	0.011	0.2	0.0019	0.0036	0.96	-0.2	0.0024	-0.059	0.38	0.38	2.5e-09	-0.00076	0.99	0.018	0.79	-0.21	0.0016	-0.37	5.5e-09
CNTN1	grey	-0.26	7.9e-05	0.26	7.9e-05	-0.16	0.017	-0.16	0.015	-0.19	0.0035	0.15	0.02	0.33	3.3e-07	0.23	0.00043	-0.17	0.011	-0.0025	0.97	0.089	0.18	0.36	2.3e-08
CNTN3	grey	0.18	0.0073	-0.18	0.0073	0.071	0.29	0.22	0.001	0.075	0.26	-0.27	4.2e-05	-0.25	0.00018	0.24	0.00023	0.22	0.00079	-0.0023	0.97	-0.11	0.11	-0.42	2.1e-11
CNTNAP2	grey	-0.4	2.3e-10	0.4	2.3e-10	-0.2	0.0025	-0.21	0.0013	-0.4	4.5e-10	0.3	3.3e-06	0.4	2.1e-10	0.25	0.00011	-0.064	0.34	0.23	0.00041	0.21	0.0011	0.3	3.8e-06
COCH	grey	0.13	0.049	-0.13	0.049	0.0054	0.93	0.057	0.39	0.044	0.51	0.015	0.82	-0.22	0.00087	-0.11	0.099	0.26	6.6e-05	0.075	0.26	-0.086	0.2	-0.32	1.1e-06
COL15A1	grey	-0.31	1.9e-06	0.31	1.9e-06	0.29	6e-06	0.059	0.37	-0.32	5.5e-07	-0.26	9.4e-05	0.2	0.002	0.58	1.2e-21	0.13	0.048	0.38	4.1e-09	0.087	0.19	-0.12	0.082
COL21A1	grey	0.16	0.016	-0.16	0.016	0.24	0.00019	0.24	0.00031	0.18	0.0058	-0.12	0.081	-0.34	1.5e-07	-0.11	0.087	-0.12	0.062	-0.28	1.3e-05	-0.29	7.3e-06	-0.38	2.8e-09
COL22A1	grey	-0.31	1.4e-06	0.31	1.4e-06	-0.051	0.44	-0.21	0.0011	-0.51	2.5e-16	0.31	1.8e-06	0.49	5.3e-15	0.37	1.1e-08	0.0098	0.88	0.33	4.7e-07	0.26	5.1e-05	0.17	0.0098
COL9A3	grey	-0.042	0.53	0.042	0.53	-0.032	0.63	0.15	0.027	-0.058	0.38	-0.0006	0.99	-0.0081	0.9	0.016	0.81	-0.1	0.12	-0.12	0.064	-0.12	0.071	-0.065	0.33
COLCA2	grey	0.32	8.3e-07	-0.32	8.3e-07	-0.094	0.16	0.13	0.052	0.32	5.6e-07	0.02	0.76	-0.56	1.9e-20	-0.35	7.6e-08	0.17	0.01	-0.17	0.0087	-0.21	0.0014	-0.56	3.8e-20
COMP	grey	-0.39	8.9e-10	0.39	8.9e-10	0.18	0.0078	-0.082	0.22	-0.19	0.0035	-0.23	0.00038	0.15	0.02	0.48	2.6e-14	0.0033	0.96	0.18	0.0074	0.12	0.061	0.12	0.07
COPG1	grey	-0.36	2.9e-08	0.36	2.9e-08	-0.18	0.0059	-0.029	0.67	-0.45	6.2e-13	0.32	1.2e-06	0.41	2.1e-10	0.29	7.8e-06	-0.035	0.6	0.18	0.0077	0.23	0.00057	0.14	0.032
CORO2A	grey	-0.089	0.18	0.089	0.18	-0.33	3.9e-07	-0.041	0.54	-0.011	0.87	0.46	1.6e-13	-0.044	0.51	-0.24	0.00022	-0.029	0.66	-0.046	0.49	0.097	0.14	-0.058	0.38
CPA3	grey	-0.34	1.8e-07	0.34	1.8e-07	0.055	0.41	-0.034	0.61	-0.21	0.0018	-0.21	0.0014	0.095	0.15	0.38	1.9e-09	0.34	1.9e-07	0.33	3.8e-07	0.28	2.3e-05	-0.0065	0.92
CPA4	grey	-0.15	0.026	0.15	0.026	0.014	0.83	-0.12	0.062	0.031	0.64	-0.16	0.013	0.34	2e-07	0.097	0.14	-0.28	1.4e-05	-0.069	0.3	0.14	0.034	0.59	1.2e-22
CPE	grey	0.077	0.25	-0.077	0.25	0.19	0.0037	0.53	6.3e-18	0.08	0.23	-0.44	5.6e-12	-0.18	0.0063	0.29	1e-05	0.035	0.6	-0.075	0.26	-0.2	0.0026	-0.35	7.6e-08
CPM	grey	-0.049	0.46	0.049	0.46	0.031	0.64	-0.21	0.0016	-0.072	0.28	-0.15	0.025	0.061	0.36	0.32	1.1e-06	0.31	2.6e-06	0.42	2.4e-11	0.2	0.003	0.017	0.8
CPNE1	grey	-0.23	0.00045	0.23	0.00045	-0.076	0.25	-0.14	0.035	-0.29	6.8e-06	0.14	0.033	0.37	1e-08	0.3	3e-06	-0.12	0.063	0.14	0.037	0.11	0.11	0.21	0.0018
CPNE8	grey	-0.4	2.1e-10	0.4	2.1e-10	-0.21	0.0015	-0.24	0.00029	-0.37	1.3e-08	0.39	7.5e-10	0.45	9.8e-13	0.18	0.0058	-0.095	0.15	0.26	5.9e-05	0.29	7.5e-06	0.42	6.1e-11
CPT1B	grey	0.12	0.066	-0.12	0.066	0.39	1.3e-09	-0.0075	0.91	0.12	0.076	-0.11	0.1	-0.35	4.5e-08	-0.14	0.029	0.23	0.00037	-0.005	0.94	0.038	0.57	-0.39	1.1e-09
CRAT	grey	0.36	1.6e-08	-0.36	1.6e-08	0.37	6e-09	0.32	5.6e-07	0.3	3.1e-06	-0.42	2.6e-11	-0.28	2.4e-05	0.017	0.8	-0.25	0.00018	-0.19	0.0041	-0.31	2.4e-06	-0.26	6.2e-05
CREG1	grey	0.13	0.049	-0.13	0.049	0.045	0.5	0.11	0.11	0.34	9.7e-08	-0.35	3.6e-08	-0.47	6.1e-14	-0.16	0.015	0.17	0.0092	0.039	0.56	-0.069	0.3	-0.26	9.8e-05
CRIM1	grey	-0.094	0.16	0.094	0.16	0.18	0.0059	0.15	0.024	-0.28	1.3e-05	-0.13	0.059	0.4	2.6e-10	0.37	6.3e-09	-0.14	0.036	0.17	0.0087	0.079	0.23	0.18	0.0077
CRIP2	grey	0.58	8.9e-22	-0.58	8.9e-22	0.36	2.8e-08	0.31	1.7e-06	0.47	3.4e-14	-0.4	5.3e-10	-0.3	5.4e-06	-0.089	0.18	-0.28	2.1e-05	-0.39	9.8e-10	-0.5	1.1e-15	-0.27	4.9e-05
CRISPLD1	grey	-0.077	0.24	0.077	0.24	0.08	0.23	0.3	2.8e-06	-0.14	0.041	-0.024	0.72	0.14	0.035	0.34	1.7e-07	-0.24	0.00029	-0.076	0.25	-0.17	0.0086	-0.11	0.1
CRLF1	grey	-0.068	0.3	0.068	0.3	0.21	0.0011	0.073	0.27	0.13	0.058	-0.29	9.6e-06	-0.017	0.79	0.053	0.42	-0.29	1e-05	-0.25	0.00013	-0.22	0.00096	0.14	0.037
CRNDE	grey	0.14	0.04	-0.14	0.04	-0.0029	0.97	0.36	2.2e-08	0.31	2e-06	0.042	0.53	-0.27	3.2e-05	-0.27	3.3e-05	-0.49	2.2e-15	-0.47	1.2e-13	-0.36	1.5e-08	-0.094	0.16
CRYZ	grey	0.24	0.00025	-0.24	0.00025	0.08	0.23	0.14	0.034	0.16	0.016	-0.063	0.34	-0.14	0.032	-0.14	0.04	-0.058	0.39	-0.17	0.0097	-0.16	0.015	-0.1	0.12
CSAG3	grey	-0.34	1.8e-07	0.34	1.8e-07	-0.22	0.00099	-0.23	0.00054	-0.33	3e-07	0.27	4.6e-05	0.36	2.3e-08	0.15	0.021	-0.011	0.87	0.28	1.8e-05	0.4	2.5e-10	0.34	1.2e-07
CSGALNACT1	grey	-0.2	0.0019	0.2	0.0019	0.19	0.0047	0.0062	0.93	-0.23	0.00061	-0.43	1.1e-11	0.13	0.054	0.52	3.1e-17	0.31	1.3e-06	0.42	5.4e-11	0.17	0.011	-0.066	0.32
CSRNP1	grey	0.093	0.16	-0.093	0.16	-0.093	0.16	0.098	0.14	0.1	0.12	-0.13	0.051	0.056	0.4	-0.0011	0.99	-0.05	0.45	0.097	0.15	0.018	0.79	0.078	0.24
CSRP2	grey	-0.38	2.6e-09	0.38	2.6e-09	-0.055	0.41	-0.25	0.00011	-0.21	0.0011	0.17	0.012	0.32	6.4e-07	0.15	0.026	-0.2	0.0029	0.014	0.84	0.17	0.0081	0.43	1.2e-11
CST1	grey	-0.3	3.5e-06	0.3	3.5e-06	-0.03	0.65	-0.14	0.035	-0.44	2.7e-12	0.23	0.0004	0.36	1.9e-08	0.5	1.4e-15	0.078	0.24	0.36	1.4e-08	0.23	0.0004	0.062	0.35
CST4	grey	-0.15	0.022	0.15	0.022	0.11	0.11	0.088	0.18	-0.3	4.3e-06	-0.059	0.37	0.19	0.0033	0.4	2.2e-10	0.027	0.68	0.22	0.00078	0.13	0.05	-0.075	0.26
CST6	grey	0.21	0.0014	-0.21	0.0014	0.014	0.83	-0.11	0.09	0.4	5.1e-10	-0.27	4.9e-05	0.053	0.42	-0.13	0.052	-0.34	2.1e-07	-0.23	0.00049	-0.087	0.19	0.49	3.5e-15
CT69	grey	-0.34	2.2e-07	0.34	2.2e-07	-0.21	0.0016	-0.26	7.7e-05	-0.19	0.0038	0.24	0.00025	0.4	5.5e-10	0.038	0.57	-0.26	8.1e-05	0.018	0.78	0.23	0.00041	0.6	2.3e-23
CTAG1A	grey	-0.1	0.12	0.1	0.12	-0.1	0.13	-0.062	0.35	-0.09	0.17	0.037	0.58	0.12	0.061	0.099	0.14	-0.13	0.053	0.012	0.86	0.039	0.55	0.15	0.025
CTAG2	grey	-0.14	0.037	0.14	0.037	-0.13	0.053	-0.083	0.21	-0.13	0.046	0.056	0.4	0.17	0.0088	0.12	0.079	-0.14	0.039	0.032	0.63	0.071	0.29	0.2	0.0023
CTCFL	grey	-0.077	0.25	0.077	0.25	-0.095	0.15	-0.04	0.55	-0.053	0.43	0.11	0.098	0.064	0.34	0.06	0.37	-0.083	0.21	-0.017	0.8	0.037	0.58	0.056	0.4
CTNNAL1	grey	-0.22	0.0011	0.22	0.0011	0.06	0.37	-0.1	0.12	-0.4	5e-10	0.28	1.9e-05	0.49	3.3e-15	0.35	6.5e-08	-0.17	0.01	0.17	0.0087	0.19	0.0037	0.24	0.00028
CTSO	grey	-0.098	0.14	0.098	0.14	0.16	0.018	0.21	0.0018	-0.19	0.0037	-0.29	9.6e-06	-0.036	0.59	0.46	1.3e-13	0.36	1.4e-08	0.36	3e-08	0.23	0.00058	-0.37	1e-08
CTSV	grey	-0.36	2.1e-08	0.36	2.1e-08	-0.11	0.1	-0.38	4.2e-09	-0.34	1.3e-07	0.32	5.4e-07	0.63	4.4e-27	0.31	1.5e-06	-0.21	0.0017	0.2	0.0022	0.29	9.9e-06	0.65	2.7e-28
CTTN	grey	-0.13	0.058	0.13	0.058	-0.1	0.12	-0.088	0.18	-0.13	0.049	0.17	0.012	0.38	3.3e-09	0.082	0.22	-0.4	4.8e-10	-0.028	0.68	-0.0096	0.89	0.42	2.8e-11
CUX1	grey	-0.46	1.4e-13	0.46	1.4e-13	-0.093	0.16	-0.22	0.00072	-0.33	2.8e-07	0.11	0.1	0.41	2e-10	0.29	1.1e-05	-0.13	0.058	0.12	0.066	0.1	0.12	0.42	2.7e-11
CX3CL1	grey	-0.00026	1	0.00026	1	0.048	0.47	0.16	0.014	-0.023	0.73	-0.046	0.49	-0.25	0.00012	-0.0052	0.94	0.26	5.6e-05	0.17	0.01	0.15	0.023	-0.45	9.3e-13
CX3CR1	grey	0.5	1.2e-15	-0.5	1.2e-15	0.19	0.0039	0.27	4.3e-05	0.45	1.5e-12	-0.4	4.4e-10	-0.6	1.2e-23	-0.33	2.7e-07	0.31	2.1e-06	-0.17	0.011	-0.22	0.00091	-0.52	1.8e-17
CXADR	grey	-0.17	0.01	0.17	0.01	-0.36	2.7e-08	-0.17	0.01	0.047	0.48	0.42	2.8e-11	0.006	0.93	-0.29	5.9e-06	-0.19	0.0045	-0.11	0.09	0.1	0.11	0.24	0.00021
CXCL14	grey	-0.32	6.9e-07	0.32	6.9e-07	0.03	0.65	-0.16	0.018	-0.15	0.022	-0.15	0.023	0.39	1.6e-09	0.28	1.3e-05	-0.19	0.004	0.0089	0.89	0.15	0.022	0.55	2.7e-19
CXCL6	grey	-0.44	5e-12	0.44	5e-12	-0.23	0.00047	-0.21	0.0018	-0.55	3.3e-19	0.36	2e-08	0.54	7.2e-19	0.37	5.4e-09	0.14	0.03	0.52	6.8e-17	0.33	2.3e-07	0.25	0.00014
CXXC5	grey	0.44	4.9e-12	-0.44	4.9e-12	0.26	5.4e-05	0.28	2.4e-05	0.43	8.6e-12	-0.53	5.8e-18	-0.55	3.6e-19	-0.093	0.16	0.28	1.3e-05	-0.13	0.057	-0.28	2.1e-05	-0.54	8.9e-19
CYB5A	grey	0.39	1.8e-09	-0.39	1.8e-09	0.11	0.11	0.33	3.8e-07	0.53	1e-17	-0.31	1.2e-06	-0.6	5.1e-24	-0.28	2e-05	-0.1	0.12	-0.39	1.6e-09	-0.46	1.8e-13	-0.44	6e-12
CYB5R2	grey	-0.11	0.11	0.11	0.11	-0.1	0.13	0.079	0.23	0.079	0.23	0.17	0.011	0.11	0.091	-0.11	0.098	-0.37	8.6e-09	-0.18	0.0072	-0.094	0.16	0.27	3e-05
CYP1A1	grey	0.067	0.32	-0.067	0.32	0.057	0.39	0.26	5.9e-05	0.2	0.002	-0.14	0.039	-0.2	0.0019	-0.19	0.0037	-0.14	0.038	-0.27	2.7e-05	-0.25	0.00015	-0.11	0.095
CYP1B1	grey	-0.2	0.0019	0.2	0.0019	0.18	0.0052	0.12	0.07	-0.27	4.1e-05	-0.082	0.22	0.083	0.21	0.42	4.1e-11	0.082	0.22	0.25	0.00016	0.032	0.63	-0.24	0.00033
CYP24A1	grey	-0.4	3.6e-10	0.4	3.6e-10	-0.24	0.00021	-0.34	1.3e-07	-0.35	5.6e-08	0.43	7.4e-12	0.29	7e-06	0.047	0.48	0.19	0.0047	0.31	1.5e-06	0.4	4.4e-10	0.19	0.0045
CYP26A1	grey	-0.19	0.005	0.19	0.005	-0.098	0.14	-0.0061	0.93	-0.086	0.2	0.16	0.016	-0.02	0.76	0.0036	0.96	-0.006	0.93	0.055	0.41	0.026	0.7	-0.044	0.51
CYP2S1	grey	0.16	0.019	-0.16	0.019	-0.064	0.33	0.11	0.11	0.23	0.0004	0.099	0.14	-0.26	8.4e-05	-0.24	0.00029	-0.0044	0.95	-0.16	0.015	-0.18	0.0078	-0.22	0.00067
CYP39A1	grey	-0.2	0.002	0.2	0.002	-0.054	0.42	-0.085	0.2	-0.15	0.022	0.026	0.7	0.37	1.2e-08	0.12	0.065	-0.32	8e-07	-0.13	0.046	0.044	0.51	0.48	1.4e-14
CYP4F11	grey	-0.033	0.62	0.033	0.62	-0.14	0.036	0.049	0.46	0.054	0.42	0.082	0.22	0.022	0.74	-0.13	0.057	-0.14	0.034	-0.053	0.43	-0.11	0.1	0.14	0.039
CYP4F2	grey	0.15	0.02	-0.15	0.02	-0.095	0.15	0.019	0.77	0.33	2.9e-07	-0.085	0.2	-0.23	0.00039	-0.3	5.2e-06	-0.16	0.014	-0.2	0.002	-0.19	0.0051	0.08	0.23
CYP4F3	grey	0.38	2.2e-09	-0.38	2.2e-09	0.043	0.52	0.19	0.0045	0.53	3.7e-18	-0.21	0.0017	-0.45	7.7e-13	-0.39	7.1e-10	-0.19	0.0046	-0.34	1.5e-07	-0.4	2.3e-10	-0.15	0.02
CYP4F62P	grey	-0.17	0.011	0.17	0.011	-0.16	0.013	-0.11	0.11	-0.18	0.0075	0.21	0.0014	0.13	0.049	0.081	0.22	-0.053	0.42	0.11	0.093	0.097	0.14	0.058	0.39
CYP51A1	grey	0.3	2.9e-06	-0.3	2.9e-06	-0.18	0.007	0.21	0.0013	0.45	1.5e-12	-0.054	0.42	-0.22	0.00071	-0.35	6.2e-08	-0.36	1.9e-08	-0.45	9.9e-13	-0.39	9.2e-10	0.11	0.097
CYP7B1	grey	0.072	0.28	-0.072	0.28	-0.054	0.41	-0.097	0.15	0.18	0.0053	-0.048	0.47	-0.14	0.041	-0.11	0.1	0.092	0.17	0.033	0.62	0.05	0.45	0.00037	1
CYTL1	grey	-0.18	0.0078	0.18	0.0078	0.058	0.38	0.086	0.19	-0.12	0.065	-0.26	8e-05	0.069	0.3	0.38	3.1e-09	0.16	0.018	0.18	0.0052	-0.047	0.48	-0.11	0.092
CYYR1	grey	0.036	0.59	-0.036	0.59	0.43	8.4e-12	0.14	0.029	0.056	0.4	-0.49	5.2e-15	0.035	0.6	0.28	1.3e-05	-0.12	0.081	-0.062	0.35	-0.11	0.11	0.0075	0.91
DAAM1	grey	0.18	0.0073	-0.18	0.0073	0.024	0.72	-0.074	0.26	0.3	4.9e-06	-0.13	0.046	0.013	0.84	-0.18	0.0081	-0.26	8.6e-05	-0.36	1.8e-08	-0.15	0.021	0.34	1.7e-07
DAPK1-IT1	grey	-0.15	0.023	0.15	0.023	0.032	0.63	0.19	0.0041	-0.3	5.3e-06	-0.11	0.1	0.069	0.3	0.35	7.8e-08	0.41	1.9e-10	0.42	3.6e-11	0.24	0.00026	-0.25	0.00011
DAZ1	grey	0.00082	0.99	-0.00082	0.99	-0.047	0.48	-0.019	0.77	0.061	0.36	0.089	0.18	-0.054	0.42	-0.062	0.36	-0.11	0.11	-0.073	0.27	-0.056	0.4	0.014	0.83
DAZ2	grey	-0.038	0.57	0.038	0.57	-0.083	0.21	-0.039	0.56	0.0026	0.97	0.14	0.036	-0.021	0.75	-0.041	0.54	-0.062	0.36	-0.033	0.62	-0.017	0.8	0.02	0.77
DAZ4	grey	-0.031	0.64	0.031	0.64	-0.043	0.52	-0.033	0.62	0.0027	0.97	0.12	0.065	-0.033	0.62	-0.045	0.5	-0.044	0.51	-0.027	0.69	-0.019	0.77	0.0088	0.9
DBN1	grey	-0.066	0.32	0.066	0.32	0.23	0.0005	0.079	0.24	-0.22	0.00076	-0.037	0.58	0.3	4.8e-06	0.49	2.6e-15	-0.32	5.4e-07	0.0055	0.93	-0.15	0.023	-0.021	0.75
DBNDD2	grey	0.044	0.51	-0.044	0.51	0.39	1.5e-09	0.063	0.34	0.053	0.42	-0.1	0.13	-0.13	0.058	-0.008	0.9	-0.069	0.3	-0.051	0.44	-0.068	0.31	-0.18	0.0079
DCP1B	grey	0.12	0.081	-0.12	0.081	0.083	0.21	0.19	0.0034	-0.046	0.48	-0.063	0.34	-0.2	0.0024	0.12	0.077	0.21	0.0013	0.041	0.54	-0.068	0.3	-0.48	1.4e-14
DCT	grey	0.47	7.2e-14	-0.47	7.2e-14	0.15	0.023	0.16	0.019	0.53	9.1e-18	-0.29	1.1e-05	-0.38	2e-09	-0.28	1.9e-05	-0.28	1.7e-05	-0.42	6.1e-11	-0.37	5.1e-09	-0.14	0.041
DCUN1D5	grey	-0.16	0.013	0.16	0.013	-0.082	0.22	-0.072	0.28	-0.18	0.0078	0.18	0.0064	0.35	3.9e-08	0.13	0.054	-0.25	0.00012	0.035	0.6	-0.028	0.68	0.36	1.4e-08
DDHD2	grey	0.16	0.017	-0.16	0.017	0.1	0.12	0.2	0.0023	0.079	0.23	-0.098	0.14	-0.36	2.8e-08	-0.036	0.59	0.12	0.074	-0.11	0.09	-0.21	0.0013	-0.52	4.5e-17
DDIT4	grey	-0.44	3.5e-12	0.44	3.5e-12	-0.24	0.00026	-0.29	1e-05	-0.53	4.6e-18	0.32	5.4e-07	0.46	1.9e-13	0.34	9e-08	0.2	0.0023	0.48	1.3e-14	0.41	9e-11	0.22	0.00063
DDR1	grey	-0.23	0.00056	0.23	0.00056	-0.19	0.0046	0.026	0.7	-0.088	0.19	0.37	8.7e-09	0.16	0.013	-0.082	0.22	-0.46	2.3e-13	-0.22	0.00076	-0.068	0.31	0.19	0.0032
DDX17	grey	0.097	0.15	-0.097	0.15	-0.013	0.84	0.055	0.41	0.025	0.7	-0.067	0.32	-0.15	0.023	-0.0064	0.92	0.17	0.012	-0.017	0.8	-0.091	0.17	-0.21	0.0016
DDX3Y	grey	0.014	0.84	-0.014	0.84	-0.12	0.079	0.093	0.16	0.049	0.47	0.09	0.18	-0.13	0.048	-0.11	0.087	0.016	0.81	-0.093	0.16	-0.071	0.29	-0.16	0.017
DDX43	grey	-0.2	0.0028	0.2	0.0028	-0.074	0.26	-0.14	0.04	-0.21	0.0014	0.2	0.0021	0.17	0.0083	0.13	0.057	0.013	0.85	0.14	0.039	0.14	0.036	0.085	0.2
DEFB1	grey	0.16	0.017	-0.16	0.017	0.07	0.29	0.35	5.7e-08	0.45	1.5e-12	-0.42	4.1e-11	-0.24	0.00019	-0.23	0.00035	-0.13	0.043	-0.26	6.4e-05	-0.19	0.0049	0.087	0.19
DEFB103B	grey	-0.19	0.0038	0.19	0.0038	-0.11	0.093	-0.22	0.00081	0.047	0.48	-0.056	0.4	0.27	4.4e-05	-0.028	0.68	-0.21	0.0017	-0.097	0.15	0.089	0.18	0.61	4.1e-25
DEFB4A	grey	-0.24	0.00025	0.24	0.00025	-0.22	0.00094	-0.27	4.1e-05	0.0051	0.94	0.022	0.74	0.16	0.013	-0.054	0.42	0.051	0.44	0.051	0.44	0.24	0.00022	0.44	2e-12
DEGS1	grey	-0.29	1.2e-05	0.29	1.2e-05	-0.092	0.17	-0.19	0.0031	-0.16	0.018	-0.031	0.64	0.19	0.0033	0.24	0.00021	-0.058	0.39	0.055	0.41	0.13	0.055	0.28	1.8e-05
DEPDC7	grey	-0.29	1.1e-05	0.29	1.1e-05	-0.17	0.01	-0.26	8.4e-05	-0.25	0.00014	0.27	2.8e-05	0.55	4.9e-19	0.27	3.5e-05	-0.38	2.6e-09	0.043	0.52	0.23	0.0005	0.6	1.1e-23
DEPP1	grey	-0.007	0.92	0.007	0.92	0.24	0.00023	0.011	0.86	-0.17	0.011	-0.29	9.8e-06	-0.079	0.23	0.3	3.6e-06	0.36	2.2e-08	0.31	1.5e-06	0.075	0.26	-0.37	6.4e-09
DHCR7	grey	-0.09	0.18	0.09	0.18	-0.22	0.00063	0.024	0.72	0.034	0.61	0.22	0.00079	0.17	0.0084	-0.11	0.099	-0.38	2.9e-09	-0.21	0.0017	-0.1	0.13	0.34	2.1e-07
DHRS2	grey	-0.22	0.00072	0.22	0.00072	-0.1	0.12	-0.13	0.058	-0.26	5.1e-05	0.22	0.00064	0.29	5.9e-06	0.2	0.0024	-0.1	0.13	0.11	0.11	0.13	0.044	0.19	0.0046
DHRS3	grey	0.34	1.8e-07	-0.34	1.8e-07	0.084	0.2	0.31	1.4e-06	0.47	6e-14	-0.19	0.004	-0.58	9.9e-22	-0.4	2.4e-10	-0.051	0.44	-0.37	6.5e-09	-0.34	9.5e-08	-0.45	8.1e-13
DIAPH2	grey	0.3	2.8e-06	-0.3	2.8e-06	0.36	2.1e-08	0.21	0.0015	0.38	3.1e-09	-0.46	3.8e-13	-0.44	5e-12	-0.069	0.3	-0.035	0.6	-0.26	8.5e-05	-0.37	1.2e-08	-0.35	6.9e-08
DIO2	grey	0.43	1.6e-11	-0.43	1.6e-11	0.3	5.6e-06	0.24	0.00022	0.54	1.2e-18	-0.59	1.8e-22	-0.45	6.2e-13	-0.0019	0.98	0.006	0.93	-0.3	3.2e-06	-0.38	2e-09	-0.27	3.6e-05
DIRAS3	grey	0.031	0.64	-0.031	0.64	0.14	0.032	0.13	0.049	0.13	0.049	-0.3	5.1e-06	-0.056	0.4	0.19	0.0038	-0.14	0.037	-0.043	0.52	-0.15	0.025	-0.022	0.74
DKK1	grey	-0.29	1e-05	0.29	1e-05	-0.11	0.087	-0.21	0.0012	-0.37	6.6e-09	0.27	2.6e-05	0.54	6.7e-19	0.3	4.2e-06	-0.067	0.32	0.34	1.7e-07	0.32	1e-06	0.39	9.3e-10
DLK2	grey	-0.045	0.49	0.045	0.49	-0.033	0.62	0.034	0.61	0.019	0.78	0.028	0.68	0.28	2.3e-05	0.03	0.65	-0.37	5.5e-09	-0.2	0.0019	-0.12	0.069	0.37	5.2e-09
DLX1	grey	-0.38	2.3e-09	0.38	2.3e-09	0.049	0.46	-0.23	0.00036	-0.34	1.5e-07	0.037	0.58	0.58	1e-21	0.42	3.9e-11	-0.27	4.8e-05	0.1	0.12	0.2	0.0028	0.58	7.5e-22
DLX2	grey	-0.36	3e-08	0.36	3e-08	-0.084	0.21	-0.19	0.0035	-0.27	3.3e-05	0.19	0.0033	0.52	4e-17	0.19	0.0047	-0.33	3.1e-07	-0.035	0.6	0.14	0.032	0.61	1.1e-24
DLX3	grey	-0.23	0.00042	0.23	0.00042	-0.1	0.12	-0.27	4.9e-05	0.12	0.082	-0.055	0.41	0.15	0.028	-0.093	0.16	-0.23	0.0005	-0.17	0.0086	0.088	0.18	0.56	2.1e-20
DLX5	grey	-0.52	2.2e-17	0.52	2.2e-17	-0.26	7e-05	-0.33	2.7e-07	-0.27	4.6e-05	0.23	0.0004	0.34	1.3e-07	0.11	0.098	-0.16	0.018	0.063	0.35	0.24	0.00027	0.53	3.6e-18
DMKN	grey	0.054	0.42	-0.054	0.42	-0.02	0.76	-0.092	0.17	0.37	8.4e-09	-0.29	1.1e-05	0.04	0.55	-0.13	0.048	-0.28	1.3e-05	-0.28	2e-05	-0.029	0.66	0.53	6.3e-18
DNAH5	grey	-0.29	9.1e-06	0.29	9.1e-06	0.017	0.8	-0.078	0.24	-0.5	1.4e-15	0.21	0.0011	0.61	1.7e-24	0.45	1.6e-12	-0.1	0.12	0.27	3.3e-05	0.2	0.0022	0.32	7.8e-07
DNAJB4	grey	-0.15	0.021	0.15	0.021	0.34	1.6e-07	0.015	0.82	-0.23	0.00046	-0.017	0.79	0.34	2e-07	0.37	9.9e-09	-0.34	1.4e-07	-0.0089	0.89	-0.057	0.39	0.21	0.0012
DNAJB5	grey	-0.39	9.8e-10	0.39	9.8e-10	0.29	7.4e-06	-0.18	0.0053	-0.47	7.2e-14	0.13	0.052	0.63	4e-26	0.42	2.8e-11	-0.22	0.00078	0.2	0.002	0.24	0.00022	0.49	5.2e-15
DNAJB6	grey	-0.25	0.00019	0.25	0.00019	-0.21	0.0011	-0.25	0.00016	-0.094	0.16	0.14	0.03	0.36	2e-08	0.0038	0.95	-0.18	0.0055	0.042	0.52	0.17	0.012	0.6	1.7e-23
DNAJC15	grey	0.2	0.002	-0.2	0.002	0.16	0.019	0.12	0.064	0.13	0.059	-0.25	0.00014	-0.14	0.032	-0.0035	0.96	0.16	0.019	0.0065	0.92	-0.0084	0.9	-0.18	0.0058
DNASE1L3	grey	0.25	0.00016	-0.25	0.00016	-0.069	0.3	-0.029	0.67	0.49	3.4e-15	-0.27	4.9e-05	-0.54	1.2e-18	-0.48	1.2e-14	0.31	2.3e-06	-0.21	0.0018	-0.088	0.19	-0.18	0.007
DNER	grey	-0.2	0.0021	0.2	0.0021	-0.073	0.27	-0.09	0.17	-0.3	4.6e-06	0.15	0.024	0.45	5e-13	0.18	0.0058	-0.17	0.012	0.081	0.22	0.1	0.12	0.4	5.3e-10
DNLZ	grey	-0.3	5.3e-06	0.3	5.3e-06	-0.18	0.0068	-0.22	0.00071	-0.43	2e-11	0.28	1.5e-05	0.49	3.7e-15	0.3	2.7e-06	0.032	0.63	0.31	1.5e-06	0.28	2.1e-05	0.31	1.9e-06
DPP4	grey	-0.29	6.1e-06	0.29	6.1e-06	-0.067	0.32	-0.068	0.31	-0.26	6.9e-05	-0.051	0.44	0.3	2.9e-06	0.33	3.2e-07	0.068	0.31	0.29	6.6e-06	0.22	0.001	0.23	0.00055
DPYSL2	grey	-0.033	0.62	0.033	0.62	0.35	5.3e-08	0.12	0.066	-0.14	0.033	-0.33	4.8e-07	-0.21	0.0015	0.37	9.3e-09	0.33	3.7e-07	0.19	0.005	-0.044	0.5	-0.55	2.4e-19
DPYSL3	grey	-0.0029	0.96	0.0029	0.96	0.35	5.9e-08	0.11	0.11	-0.12	0.07	-0.26	6e-05	0.043	0.52	0.54	6.8e-19	0.036	0.59	0.16	0.015	-0.12	0.064	-0.27	4.7e-05
DSC1	grey	-0.33	4.9e-07	0.33	4.9e-07	-0.048	0.47	-0.18	0.0068	-0.067	0.31	-0.08	0.23	0.32	9e-07	0.13	0.046	-0.16	0.017	-0.0055	0.93	0.22	0.00074	0.59	7.5e-23
DSCR8	grey	-0.06	0.37	0.06	0.37	0.097	0.14	-0.028	0.67	-0.12	0.076	0.0029	0.97	0.2	0.0023	0.15	0.022	-0.23	0.00061	-0.027	0.69	-0.017	0.79	0.16	0.016
DSG1	grey	-0.024	0.71	0.024	0.71	0.053	0.42	-0.09	0.17	0.28	1.4e-05	-0.27	3.1e-05	0.12	0.075	-0.045	0.5	-0.36	2.5e-08	-0.27	3.8e-05	-0.055	0.41	0.58	6.2e-22
DTD2	grey	-0.12	0.081	0.12	0.081	-0.2	0.0022	-0.058	0.38	-0.05	0.45	0.15	0.023	0.33	2.2e-07	0.023	0.73	-0.3	4.7e-06	-0.077	0.24	-0.0022	0.97	0.48	9e-15
DTX4	grey	0.026	0.7	-0.026	0.7	0.098	0.14	0.49	2.2e-15	-0.13	0.059	-0.16	0.016	-0.029	0.66	0.22	0.00078	0.018	0.79	-0.016	0.81	-0.14	0.032	-0.33	2.9e-07
DUOXA2	grey	0.27	4.5e-05	-0.27	4.5e-05	-0.05	0.45	0.063	0.34	0.43	6.8e-12	-0.084	0.21	-0.41	1.1e-10	-0.5	1e-15	0.07	0.29	-0.28	1.2e-05	-0.12	0.078	-0.15	0.025
DUSP1	grey	-0.13	0.056	0.13	0.056	-0.11	0.097	0.026	0.69	-0.027	0.68	0.02	0.77	0.14	0.035	0.057	0.39	-0.11	0.1	0.034	0.61	0.042	0.52	0.17	0.012
DUSP14	grey	-0.3	5.1e-06	0.3	5.1e-06	-0.11	0.092	-0.27	4.5e-05	-0.074	0.26	0.028	0.67	0.45	4.8e-13	0.12	0.08	-0.3	2.8e-06	-0.01	0.88	0.2	0.0027	0.73	1e-39
DUSP2	grey	-0.29	8.2e-06	0.29	8.2e-06	-0.3	5e-06	-0.25	0.0001	-0.25	0.00013	0.26	8.7e-05	0.065	0.33	0.02	0.76	0.46	4.4e-13	0.41	1.6e-10	0.38	4.9e-09	-0.024	0.71
DUSP4	grey	-0.15	0.028	0.15	0.028	-0.017	0.8	0.18	0.0057	-0.34	1.8e-07	0.049	0.46	0.32	6.9e-07	0.21	0.0011	0.2	0.0028	0.44	5.4e-12	0.36	2.5e-08	0.066	0.32
DUSP7	grey	-0.35	3.8e-08	0.35	3.8e-08	-0.32	1.1e-06	-0.34	1.8e-07	-0.2	0.003	0.39	8.2e-10	0.57	8.3e-21	0.018	0.78	-0.37	1e-08	0.018	0.79	0.23	0.00054	0.78	9.7e-49
DYNC2H1	grey	-0.18	0.0059	0.18	0.0059	0.023	0.73	-0.065	0.33	-0.32	1.2e-06	0.1	0.12	0.35	5.1e-08	0.39	1.2e-09	-0.074	0.27	0.18	0.008	0.026	0.7	0.14	0.03
E2F8	grey	0.37	7.6e-09	-0.37	7.6e-09	-0.084	0.2	-0.017	0.8	0.46	3.8e-13	0.28	1.6e-05	-0.49	2.7e-15	-0.6	7.4e-24	-0.056	0.4	-0.36	3.1e-08	-0.23	0.00039	-0.24	0.00019
EBNA1BP2	grey	-0.3	4.6e-06	0.3	4.6e-06	-0.2	0.0025	-0.25	0.00014	-0.35	7.2e-08	0.45	1.1e-12	0.6	3.9e-24	0.12	0.074	-0.32	9.7e-07	0.11	0.11	0.21	0.0012	0.62	1.1e-25
ECHDC3	grey	0.27	4.1e-05	-0.27	4.1e-05	0.065	0.33	0.22	0.00077	0.36	1.4e-08	-0.2	0.0026	-0.35	4.6e-08	-0.26	6.4e-05	-0.09	0.18	-0.22	0.00093	-0.26	5.5e-05	-0.23	0.00043
ECI2	grey	0.24	0.00034	-0.24	0.00034	0.47	9e-14	0.19	0.0044	0.07	0.3	-0.2	0.0021	0.0047	0.94	0.095	0.15	-0.2	0.0026	-0.16	0.016	-0.22	0.0011	-0.11	0.1
ECSCR	grey	0.21	0.0018	-0.21	0.0018	0.52	3.2e-17	0.25	0.0001	0.2	0.0026	-0.65	1.3e-28	-0.23	0.00055	0.19	0.0033	0.064	0.33	-0.017	0.8	-0.21	0.0012	-0.3	3.2e-06
EDDM13	grey	-0.38	4.1e-09	0.38	4.1e-09	-0.14	0.041	-0.35	7.8e-08	-0.2	0.0025	0.14	0.029	0.31	1.8e-06	0.19	0.0038	-0.17	0.012	0.038	0.56	0.13	0.056	0.44	1.8e-12
EDN1	grey	-0.23	0.00052	0.23	0.00052	-0.027	0.68	-0.08	0.23	-0.24	0.00034	-0.0094	0.89	0.41	1e-10	0.4	5.2e-10	-0.18	0.0057	0.19	0.0036	0.094	0.16	0.31	1.4e-06
EDN2	grey	-0.12	0.08	0.12	0.08	-0.17	0.012	-0.14	0.039	-0.12	0.064	0.3	2.8e-06	0.17	0.011	0.013	0.85	-0.19	0.0032	-0.077	0.25	-0.019	0.77	0.18	0.0074
EFEMP1	grey	0.15	0.025	-0.15	0.025	0.45	7.9e-13	0.25	0.00014	0.11	0.11	-0.49	1.9e-15	-0.08	0.23	0.3	5.7e-06	-0.026	0.69	-0.0078	0.91	-0.14	0.029	-0.2	0.002
EFNA1	grey	-0.37	9.8e-09	0.37	9.8e-09	-0.18	0.0075	-0.079	0.23	-0.35	3.6e-08	0.39	1.2e-09	0.47	9.1e-14	0.22	0.00073	-0.34	1.3e-07	0.062	0.35	0.13	0.05	0.38	2.4e-09
EFNB2	grey	-0.2	0.002	0.2	0.002	-0.021	0.75	-0.11	0.11	-0.33	2.6e-07	0.15	0.02	0.58	3.5e-22	0.4	2.2e-10	-0.38	3.6e-09	0.093	0.16	0.058	0.39	0.42	2.4e-11
EGFR	grey	-0.24	0.00033	0.24	0.00033	-0.2	0.0024	-0.06	0.37	-0.29	6e-06	0.35	8e-08	0.48	1.1e-14	0.16	0.018	-0.43	9.7e-12	-0.065	0.33	0.0041	0.95	0.42	4.3e-11
EGLN3	grey	-0.34	1.3e-07	0.34	1.3e-07	-0.24	0.0002	-0.28	1.3e-05	-0.29	9.1e-06	0.34	1e-07	0.37	6.3e-09	0.12	0.078	-0.047	0.48	0.16	0.019	0.24	0.00027	0.38	2.1e-09
EGR1	grey	-0.19	0.0047	0.19	0.0047	-0.093	0.16	0.09	0.18	-0.16	0.015	0.1	0.12	0.058	0.39	0.18	0.0055	0.073	0.27	0.13	0.053	0.078	0.24	-0.15	0.028
EGR2	grey	-0.17	0.012	0.17	0.012	-0.13	0.052	-0.041	0.54	-0.19	0.0047	0.096	0.15	0.052	0.44	0.2	0.0028	0.23	0.00059	0.26	8.7e-05	0.14	0.035	-0.15	0.02
EGR3	grey	-0.3	3e-06	0.3	3e-06	-0.16	0.014	-0.09	0.18	-0.21	0.0012	0.051	0.44	0.12	0.062	0.19	0.0034	0.25	0.00015	0.29	1.2e-05	0.19	0.0034	0.04	0.55
EHBP1	grey	0.059	0.38	-0.059	0.38	0.1	0.13	0.093	0.16	0.088	0.19	-0.061	0.36	0.11	0.095	0.072	0.28	-0.45	1.2e-12	-0.29	6.7e-06	-0.29	1.1e-05	0.19	0.0035
EID3	grey	-0.22	0.00076	0.22	0.00076	-0.12	0.06	-0.17	0.0088	-0.3	2.9e-06	0.14	0.029	0.096	0.15	0.16	0.016	0.38	2.3e-09	0.42	2.6e-11	0.24	0.00026	-0.067	0.32
EIF1AY	grey	0.14	0.036	-0.14	0.036	-0.019	0.78	0.13	0.055	0.18	0.0079	-0.027	0.68	-0.33	4.3e-07	-0.21	0.0016	0.11	0.087	-0.15	0.026	-0.14	0.034	-0.32	8.5e-07
EIF3C	grey	0.057	0.39	-0.057	0.39	-0.1	0.13	0.12	0.078	0.028	0.68	0.012	0.86	-0.096	0.15	-0.11	0.1	0.073	0.27	-0.031	0.64	-0.021	0.75	-0.081	0.22
EIF4EBP1	grey	-0.057	0.39	0.057	0.39	-0.075	0.26	0.031	0.64	0.023	0.73	0.17	0.0088	0.22	0.00078	0.0023	0.97	-0.47	5.1e-14	-0.2	0.0021	-0.11	0.1	0.32	6.2e-07
EIF5A	grey	-0.061	0.36	0.061	0.36	-0.17	0.011	-0.1	0.13	-0.0069	0.92	0.12	0.063	0.11	0.11	-0.037	0.58	-0.054	0.42	0.0074	0.91	0.0048	0.94	0.18	0.008
ELAVL2	grey	-0.37	7.3e-09	0.37	7.3e-09	-0.16	0.015	-0.3	3.7e-06	-0.41	1.6e-10	0.4	3e-10	0.55	2.1e-19	0.22	0.00066	-0.083	0.21	0.25	0.00017	0.41	1.9e-10	0.47	5.2e-14
ELF5	grey	0.14	0.033	-0.14	0.033	0.06	0.37	0.39	9.4e-10	0.4	3.6e-10	-0.39	1e-09	-0.38	4.1e-09	-0.21	0.0017	-0.05	0.45	-0.32	1.1e-06	-0.27	3.7e-05	-0.12	0.067
ELL2	grey	0.13	0.053	-0.13	0.053	-0.14	0.037	-0.0033	0.96	0.33	2.5e-07	-0.18	0.0077	0.024	0.72	-0.24	0.00028	-0.34	2.2e-07	-0.31	2.1e-06	-0.17	0.011	0.43	1.5e-11
ELL3	grey	0.31	1.4e-06	-0.31	1.4e-06	-0.032	0.63	-0.0021	0.97	0.41	1.9e-10	-0.17	0.0086	-0.41	1.8e-10	-0.45	7.1e-13	0.12	0.074	-0.32	5.9e-07	-0.25	0.0001	-0.068	0.31
ELMO3	grey	-0.062	0.35	0.062	0.35	-0.11	0.088	-0.015	0.82	0.12	0.065	0.053	0.43	0.2	0.002	-0.19	0.005	-0.42	2.9e-11	-0.25	0.00016	0.021	0.75	0.52	1.6e-17
ELOVL3	grey	0.048	0.47	-0.048	0.47	0.011	0.87	-0.088	0.19	0.034	0.61	0.026	0.7	-0.02	0.76	-0.031	0.65	-0.12	0.062	-0.072	0.28	-0.043	0.52	0.021	0.75
ELOVL7	grey	-0.12	0.063	0.12	0.063	-0.066	0.32	-0.091	0.17	0.2	0.0029	-0.19	0.0041	-0.11	0.087	-0.24	0.00027	0.078	0.24	-0.021	0.75	0.23	0.00061	0.27	3.6e-05
EMILIN3	grey	0.062	0.35	-0.062	0.35	-0.048	0.47	0.11	0.084	0.19	0.0045	-0.055	0.41	-0.012	0.86	-0.074	0.26	-0.4	2.7e-10	-0.34	1e-07	-0.25	0.00011	0.18	0.0079
EML6	grey	0.13	0.052	-0.13	0.052	-0.17	0.012	-0.11	0.1	0.19	0.0047	0.0072	0.91	-0.13	0.055	-0.22	0.00088	0.071	0.28	-0.23	0.00053	-0.16	0.013	0.11	0.097
EN1	grey	-0.39	1.4e-09	0.39	1.4e-09	-0.096	0.15	-0.19	0.0032	-0.41	1.6e-10	0.22	0.00091	0.51	1.7e-16	0.36	2.8e-08	-0.18	0.0052	0.19	0.0037	0.22	0.00075	0.44	5.6e-12
ENDOD1	grey	0.17	0.012	-0.17	0.012	0.25	0.00017	0.064	0.34	0.24	0.00026	-0.33	4.9e-07	0.18	0.008	0.07	0.29	-0.53	7.3e-18	-0.33	2.7e-07	-0.24	0.00026	0.43	1e-11
ENDOG	grey	0.25	0.0001	-0.25	0.0001	0.26	5.1e-05	0.14	0.04	0.37	9.9e-09	-0.11	0.11	-0.15	0.028	-0.23	0.00053	-0.4	3.1e-10	-0.41	1.9e-10	-0.29	7.1e-06	0.1	0.13
ENPP4	grey	0.31	1.3e-06	-0.31	1.3e-06	0.31	1.2e-06	0.49	6.4e-15	0.15	0.022	-0.32	1e-06	-0.5	1.2e-15	-0.078	0.24	0.38	3.9e-09	0.065	0.32	-0.11	0.089	-0.73	2.3e-39
ENPP5	grey	0.18	0.0066	-0.18	0.0066	0.12	0.067	0.52	6.3e-17	0.095	0.15	-0.042	0.53	-0.38	4e-09	-0.12	0.069	0.069	0.3	-0.11	0.093	-0.19	0.0045	-0.58	3.4e-22
ENTPD3	grey	0.036	0.58	-0.036	0.58	-0.039	0.56	0.41	1.3e-10	0.24	0.00024	-0.19	0.0042	-0.033	0.62	-0.17	0.012	-0.37	1.3e-08	-0.29	8.2e-06	-0.2	0.002	0.18	0.0062
EOGT	grey	-0.2	0.0022	0.2	0.0022	0.14	0.03	-0.038	0.57	-0.39	9.6e-10	0.072	0.28	0.26	5.3e-05	0.4	2.2e-10	0.14	0.032	0.4	5.8e-10	0.19	0.0045	-0.088	0.18
EPB41L1	grey	0.31	2.4e-06	-0.31	2.4e-06	-0.027	0.69	0.22	0.00098	0.48	8.4e-15	-0.098	0.14	-0.51	9.3e-17	-0.37	1.1e-08	-0.071	0.29	-0.32	6.5e-07	-0.28	1.3e-05	-0.34	1.6e-07
EPCAM	grey	-0.12	0.062	0.12	0.062	-0.042	0.53	0.36	1.6e-08	-0.16	0.016	0.28	1.5e-05	0.096	0.15	0.036	0.59	-0.3	4.6e-06	-0.085	0.2	-0.15	0.021	-0.084	0.21
EPHA4	grey	0.039	0.55	-0.039	0.55	0.036	0.59	0.032	0.63	0.2	0.0028	-0.21	0.0011	-0.033	0.62	-0.029	0.66	-0.14	0.038	-0.19	0.0049	-0.0026	0.97	0.18	0.0065
EPHB3	grey	0.083	0.21	-0.083	0.21	-0.027	0.69	0.1	0.13	0.34	2.1e-07	-0.14	0.031	0.01	0.88	-0.15	0.028	-0.49	6.5e-15	-0.41	1.3e-10	-0.23	0.00036	0.39	9.4e-10
EPHX1	grey	0.32	6.6e-07	-0.32	6.6e-07	0.17	0.01	0.37	1.3e-08	0.47	6.2e-14	-0.38	4e-09	-0.55	1.4e-19	-0.23	0.00039	-0.071	0.29	-0.34	2e-07	-0.41	9.4e-11	-0.44	2.2e-12
EPPK1	grey	-0.59	1e-22	0.59	1e-22	-0.3	4.9e-06	-0.3	3.2e-06	-0.33	2.7e-07	0.3	5.2e-06	0.5	1e-15	0.12	0.079	-0.13	0.048	0.16	0.015	0.39	1.6e-09	0.66	9.7e-30
EPS8	grey	0.071	0.29	-0.071	0.29	0.37	1.2e-08	0.32	1e-06	0.033	0.62	-0.39	8e-10	-0.18	0.007	0.38	3.4e-09	0.011	0.87	0.048	0.47	-0.27	4.7e-05	-0.45	1.2e-12
EPYC	grey	-0.18	0.0072	0.18	0.0072	-0.033	0.62	-0.074	0.26	-0.28	2.4e-05	0.18	0.0079	0.078	0.24	0.39	1.5e-09	0.088	0.19	0.24	0.0003	0.049	0.46	-0.22	0.00069
ERAP2	grey	-0.18	0.0063	0.18	0.0063	-0.17	0.011	-0.27	2.8e-05	-0.23	0.00045	0.17	0.0096	0.15	0.021	0.04	0.55	0.28	1.6e-05	0.27	4.4e-05	0.37	6.1e-09	0.11	0.09
EREG	grey	0.025	0.7	-0.025	0.7	-0.083	0.21	-0.12	0.07	0.17	0.012	-0.16	0.013	0.23	0.00048	-0.016	0.81	-0.27	3.1e-05	-0.11	0.11	-0.021	0.76	0.51	2.8e-16
ERFE	grey	-0.25	0.00013	0.25	0.00013	0.23	0.00052	-0.071	0.28	-0.42	3.1e-11	0.063	0.35	0.43	1.5e-11	0.4	3e-10	-0.12	0.08	0.26	9.9e-05	0.095	0.15	0.14	0.038
ERO1B	grey	0.047	0.48	-0.047	0.48	0.0022	0.97	0.18	0.0073	-0.12	0.065	0.058	0.38	-0.33	5e-07	-0.062	0.35	0.45	5.5e-13	0.18	0.0078	0.028	0.67	-0.66	9e-30
ERP27	grey	0.02	0.76	-0.02	0.76	-0.075	0.26	-0.13	0.054	0.069	0.3	-0.023	0.73	-0.048	0.47	-0.19	0.0043	0.2	0.0023	0.063	0.34	0.13	0.043	0.095	0.15
ERVMER34-1	grey	-0.47	4.4e-14	0.47	4.4e-14	-0.28	2.5e-05	-0.29	6.5e-06	-0.45	5e-13	0.5	3.8e-16	0.58	4.9e-22	0.22	0.00088	-0.24	0.00034	0.15	0.023	0.23	0.0004	0.53	7e-18
ESCO1	grey	0.012	0.85	-0.012	0.85	-0.035	0.6	0.079	0.24	-0.033	0.62	0.088	0.19	-0.011	0.87	-0.015	0.82	-0.011	0.87	-0.0066	0.92	-0.1	0.13	-0.049	0.46
ESF1	grey	-0.24	0.00023	0.24	0.00023	-0.037	0.58	-0.066	0.32	-0.4	2.9e-10	0.29	7.2e-06	0.42	2.2e-11	0.27	3.9e-05	-0.14	0.04	0.19	0.0043	0.061	0.36	0.21	0.0018
ETFB	grey	0.44	3.2e-12	-0.44	3.2e-12	0.25	0.0001	0.2	0.0022	0.56	2.4e-20	-0.2	0.002	-0.48	1.3e-14	-0.44	5.8e-12	-0.29	1.1e-05	-0.52	5e-17	-0.45	1.2e-12	-0.19	0.0033
ETFRF1	grey	0.41	1.8e-10	-0.41	1.8e-10	0.35	3.7e-08	0.35	6e-08	0.42	5.5e-11	-0.37	7.3e-09	-0.47	4.4e-14	-0.26	7.8e-05	0.0041	0.95	-0.29	6.8e-06	-0.29	8.6e-06	-0.38	2.3e-09
ETS2	grey	-0.39	1.4e-09	0.39	1.4e-09	-0.3	5.4e-06	-0.2	0.0022	-0.3	5.3e-06	0.31	1.8e-06	0.48	1.1e-14	0.12	0.078	-0.21	0.0016	0.16	0.013	0.31	1.2e-06	0.51	2.8e-16
EVA1C	grey	0.19	0.0034	-0.19	0.0034	-0.037	0.58	0.25	0.00018	0.32	9.2e-07	-0.14	0.041	-0.49	6.5e-15	-0.33	5e-07	0.12	0.082	-0.17	0.0088	-0.18	0.0073	-0.38	3.1e-09
EXTL2	grey	-0.29	7.7e-06	0.29	7.7e-06	0.14	0.034	0.063	0.34	-0.41	1.1e-10	0.078	0.24	0.35	8.2e-08	0.58	3.4e-22	-0.24	0.00027	0.04	0.55	-0.061	0.36	-0.033	0.62
F13A1	grey	0.15	0.022	-0.15	0.022	0.44	3.6e-12	0.22	0.00099	0.18	0.0061	-0.57	3e-21	-0.21	0.0017	0.25	0.00011	0.16	0.015	0.048	0.47	-0.11	0.087	-0.23	0.00036
F3	grey	0.04	0.54	-0.04	0.54	-0.013	0.84	0.041	0.53	-0.085	0.2	-0.0088	0.89	0.42	5.8e-11	0.21	0.0013	-0.23	0.00035	0.065	0.33	0.083	0.21	0.33	3.2e-07
F8	grey	0.23	0.0004	-0.23	0.0004	0.47	4.7e-14	0.29	7.1e-06	0.1	0.13	-0.22	0.00088	-0.43	1.7e-11	-0.085	0.2	0.12	0.06	-0.11	0.1	-0.19	0.0048	-0.62	2.7e-25
FABP4	grey	-0.056	0.4	0.056	0.4	0.21	0.0016	0.11	0.11	-0.024	0.72	-0.18	0.0077	0.19	0.004	0.18	0.0067	-0.22	0.0011	-0.05	0.45	-0.041	0.54	0.24	0.0003
FABP5	grey	-0.31	1.2e-06	0.31	1.2e-06	-0.15	0.021	-0.24	0.00027	-0.07	0.29	0.098	0.14	0.45	7.8e-13	0.14	0.037	-0.33	3.7e-07	0.0078	0.91	0.22	0.00088	0.74	1.6e-40
FABP7	grey	0.31	1.9e-06	-0.31	1.9e-06	0.38	2.4e-09	0.33	4.9e-07	0.21	0.0015	-0.22	0.00079	-0.26	7.5e-05	-0.13	0.051	-0.17	0.01	-0.23	0.00046	-0.22	0.00079	-0.28	2e-05
FADD	grey	-0.37	8.8e-09	0.37	8.8e-09	-0.24	0.00027	-0.2	0.0022	-0.45	5.7e-13	0.42	5.6e-11	0.57	9.3e-21	0.25	0.00011	-0.14	0.033	0.24	0.00026	0.27	2.8e-05	0.4	2.6e-10
FAIM	grey	-0.18	0.0061	0.18	0.0061	-0.28	2.3e-05	-0.072	0.28	-0.11	0.09	0.42	5e-11	0.072	0.28	-0.057	0.39	-0.043	0.52	0.042	0.52	0.14	0.037	0.058	0.38
FAM110C	grey	-0.018	0.79	0.018	0.79	-0.079	0.24	-0.14	0.032	0.31	2.4e-06	-0.051	0.44	0.062	0.35	-0.21	0.0012	-0.34	2.1e-07	-0.29	8.5e-06	-0.085	0.2	0.51	1.8e-16
FAM114A1	grey	0.21	0.0012	-0.21	0.0012	0.31	2.4e-06	0.44	4.7e-12	0.2	0.0031	-0.43	1.8e-11	-0.055	0.41	0.31	2.1e-06	-0.37	1.2e-08	-0.28	1.6e-05	-0.41	1.1e-10	-0.15	0.028
FAM118A	grey	-0.08	0.23	0.08	0.23	0.077	0.25	0.019	0.78	-0.18	0.0061	0.034	0.61	0.014	0.84	0.18	0.0052	0.16	0.018	0.13	0.05	0.024	0.72	-0.18	0.0066
FAM13B	grey	0.28	2.4e-05	-0.28	2.4e-05	0.026	0.7	0.2	0.0023	0.13	0.053	-0.13	0.042	-0.48	1.2e-14	-0.14	0.03	0.5	4.9e-16	0.037	0.58	-0.086	0.2	-0.65	2.4e-28
FAM169A	grey	-0.21	0.0013	0.21	0.0013	-0.24	0.00028	0.011	0.87	-0.37	1.2e-08	0.24	0.00021	0.4	2.2e-10	0.18	0.0055	0.088	0.19	0.27	2.6e-05	0.28	2e-05	0.21	0.0015
FAM171A1	grey	0.33	4.2e-07	-0.33	4.2e-07	0.27	3.9e-05	0.34	9.2e-08	0.27	2.8e-05	-0.42	5.6e-11	-0.54	1e-18	-0.033	0.62	0.22	0.00084	-0.12	0.067	-0.32	9.7e-07	-0.72	1.4e-37
FAM174A	grey	0.29	6.6e-06	-0.29	6.6e-06	0.025	0.7	0.21	0.0017	0.43	8.8e-12	-0.27	4.4e-05	-0.18	0.0063	-0.29	1.1e-05	-0.3	3.4e-06	-0.37	1.3e-08	-0.24	0.0002	0.15	0.021
FAM184B	grey	0.1	0.13	-0.1	0.13	0.083	0.21	0.11	0.11	0.044	0.51	-0.051	0.44	-0.072	0.28	-0.02	0.76	-0.012	0.86	-0.061	0.36	-0.07	0.3	-0.12	0.068
FAM20A	grey	-0.31	1.5e-06	0.31	1.5e-06	0.0025	0.97	-0.061	0.36	-0.35	3.9e-08	-0.15	0.024	0.33	4e-07	0.52	3.1e-17	0.18	0.0067	0.47	5e-14	0.38	3.2e-09	0.13	0.059
FAM210B	grey	0.076	0.26	-0.076	0.26	0.31	1.9e-06	0.28	1.5e-05	0.087	0.19	-0.33	3.2e-07	-0.2	0.0024	0.17	0.011	-0.18	0.007	-0.19	0.0043	-0.35	4.1e-08	-0.3	3.2e-06
FAM216A	grey	-0.3	2.8e-06	0.3	2.8e-06	0.011	0.86	-0.18	0.006	-0.52	6.1e-17	0.29	6.9e-06	0.37	8.4e-09	0.42	5.6e-11	0.17	0.0094	0.38	4.2e-09	0.18	0.0061	-0.00028	1
FAM229B	grey	-0.1	0.12	0.1	0.12	0.29	8e-06	0.28	1.5e-05	-0.22	0.00065	-0.11	0.096	0.14	0.04	0.53	3.6e-18	-0.21	0.0012	-0.017	0.79	-0.2	0.0031	-0.27	4.5e-05
FAM43A	grey	-0.36	3.2e-08	0.36	3.2e-08	-0.16	0.015	-0.23	0.00059	-0.07	0.29	-0.044	0.51	0.22	0.00073	0.12	0.07	-0.05	0.45	0.051	0.44	0.19	0.0045	0.45	1.7e-12
FAM83A	grey	-0.28	1.5e-05	0.28	1.5e-05	-0.17	0.0089	-0.23	0.00035	-0.19	0.0042	0.18	0.0056	0.61	1.9e-24	0.15	0.02	-0.34	9.3e-08	0.082	0.22	0.24	0.00021	0.76	4.1e-44
FAM83B	grey	-0.33	2.2e-07	0.33	2.2e-07	-0.33	3.3e-07	-0.31	2.1e-06	-0.075	0.26	0.33	4.9e-07	0.47	4.8e-14	-0.073	0.27	-0.45	1.3e-12	-0.14	0.038	0.16	0.017	0.82	2.5e-56
FAM83D	grey	0.38	2.4e-09	-0.38	2.4e-09	-0.16	0.015	0.038	0.57	0.53	3.2e-18	0.21	0.0017	-0.42	3.2e-11	-0.53	2.9e-18	-0.16	0.016	-0.43	8.5e-12	-0.35	5e-08	-0.13	0.054
FAM83F	grey	-0.13	0.047	0.13	0.047	-0.19	0.0043	-0.074	0.26	0.07	0.29	0.2	0.0019	0.27	4e-05	-0.21	0.0011	-0.45	1.1e-12	-0.23	0.00055	0.067	0.31	0.58	1.4e-21
FAM83G	grey	0.034	0.61	-0.034	0.61	-0.039	0.56	-0.1	0.11	0.36	1.6e-08	-0.15	0.024	0.055	0.41	-0.28	2.3e-05	-0.5	1.1e-15	-0.46	4.3e-13	-0.18	0.006	0.58	9.1e-22
FAS	grey	0.081	0.22	-0.081	0.22	-0.11	0.11	-0.24	0.00029	0.0065	0.92	0.15	0.021	-0.19	0.0035	-0.15	0.024	0.39	1.5e-09	0.22	0.001	0.27	4.7e-05	-0.27	3.6e-05
FAT2	grey	-0.058	0.38	0.058	0.38	-0.23	0.00058	-0.24	0.00025	0.18	0.0081	0.28	1.3e-05	0.096	0.15	-0.22	0.00076	-0.41	1.1e-10	-0.27	3e-05	0.034	0.61	0.43	1.6e-11
FAT4	grey	0.00076	0.99	-0.00076	0.99	0.32	7.9e-07	0.19	0.0046	0.14	0.04	-0.55	9.3e-20	-0.13	0.053	0.35	3.9e-08	-0.052	0.43	-0.089	0.18	-0.22	0.00096	-0.14	0.031
FBLN1	grey	0.058	0.38	-0.058	0.38	0.4	4.9e-10	0.22	0.00093	0.11	0.11	-0.48	9.9e-15	-0.25	0.00012	0.41	1.7e-10	-0.022	0.74	-0.016	0.81	-0.23	0.00043	-0.42	5.3e-11
FBP1	grey	-0.01	0.88	0.01	0.88	-0.0025	0.97	0.22	0.00063	-0.11	0.086	-0.098	0.14	-0.043	0.52	0.22	0.00083	0.18	0.008	0.34	1.1e-07	0.088	0.19	-0.25	0.00014
FBXO32	grey	0.091	0.17	-0.091	0.17	0.42	2.1e-11	0.17	0.012	-0.16	0.015	-0.15	0.019	0.13	0.05	0.42	4.3e-11	-0.055	0.41	0.14	0.036	-0.081	0.22	-0.19	0.0036
FBXO45	grey	-0.53	7.2e-18	0.53	7.2e-18	-0.34	1.7e-07	-0.37	5.6e-09	-0.3	3.1e-06	0.41	9.6e-11	0.48	2.8e-14	0.091	0.17	-0.19	0.0032	0.1	0.12	0.32	1e-06	0.66	1.8e-29
FCGBP	grey	0.21	0.0014	-0.21	0.0014	0.055	0.41	0.52	2.8e-17	0.31	1.4e-06	-0.33	2.7e-07	-0.41	8.6e-11	-0.24	0.0003	-0.025	0.7	-0.33	4.1e-07	-0.24	0.00027	-0.35	6.3e-08
FCGRT	grey	0.1	0.13	-0.1	0.13	0.29	1.2e-05	0.29	6.7e-06	0.026	0.7	-0.46	2e-13	-0.34	1e-07	0.27	3.3e-05	0.44	1.9e-12	0.3	4.7e-06	0.0093	0.89	-0.65	6.4e-29
FDCSP	grey	0.13	0.045	-0.13	0.045	-0.04	0.55	0.38	2.7e-09	0.014	0.84	-0.019	0.78	-0.31	2.2e-06	-0.089	0.18	0.42	4.8e-11	0.11	0.11	-0.058	0.39	-0.53	7e-18
FDPSP2	grey	0.23	0.00044	-0.23	0.00044	-0.23	0.00037	0.06	0.37	0.27	3.3e-05	0.22	0.00094	-0.39	6.3e-10	-0.48	1.3e-14	0.024	0.72	-0.21	0.0017	-0.1	0.12	-0.28	2.3e-05
FDXR	grey	0.19	0.0035	-0.19	0.0035	-0.12	0.081	-0.072	0.28	0.46	4.5e-13	0.034	0.61	-0.24	0.00033	-0.48	1.1e-14	-0.34	9.2e-08	-0.42	2.8e-11	-0.18	0.0058	0.21	0.0012
FFAR2	grey	-0.19	0.0044	0.19	0.0044	-0.12	0.066	-0.14	0.031	-0.25	0.00011	0.15	0.026	0.32	8.8e-07	0.15	0.02	0.1	0.13	0.45	9.8e-13	0.29	1.2e-05	0.24	0.00025
FGF13	grey	0.2	0.003	-0.2	0.003	0.37	6.1e-09	0.45	1.5e-12	0.22	0.00099	-0.32	5.3e-07	-0.25	0.00011	0.021	0.75	-0.1	0.12	-0.27	2.8e-05	-0.36	2.2e-08	-0.28	1.3e-05
FGFBP2	grey	0.34	1.1e-07	-0.34	1.1e-07	0.23	0.00039	0.38	4.1e-09	0.28	2.4e-05	-0.21	0.0014	-0.23	0.00042	-0.12	0.071	-0.29	8.1e-06	-0.35	3.6e-08	-0.38	4.8e-09	-0.21	0.0014
FGFR3	grey	0.22	0.0007	-0.22	0.0007	-0.15	0.021	0.018	0.78	0.49	2.9e-15	-0.0058	0.93	-0.36	2.2e-08	-0.53	7.2e-18	-0.18	0.0058	-0.42	2.8e-11	-0.24	0.00029	0.021	0.76
FHDC1	grey	0.36	2.2e-08	-0.36	2.2e-08	0.091	0.17	0.046	0.48	0.53	9.2e-18	-0.34	9.1e-08	-0.29	8.3e-06	-0.25	0.00011	-0.23	0.00036	-0.42	3e-11	-0.32	7e-07	0.052	0.43
FKBP1B	grey	0.048	0.47	-0.048	0.47	0.095	0.15	0.15	0.028	0.085	0.2	-0.13	0.046	0.079	0.23	0.16	0.013	-0.22	0.00093	-0.061	0.36	-0.17	0.0082	0.077	0.25
FKBP5	grey	-0.37	7.3e-09	0.37	7.3e-09	-0.048	0.47	-0.18	0.0074	-0.47	5.1e-14	0.19	0.0048	0.38	2.7e-09	0.38	3.7e-09	0.21	0.0011	0.47	5.2e-14	0.37	5.9e-09	0.17	0.012
FLG2	grey	-0.17	0.0097	0.17	0.0097	0.02	0.76	-0.11	0.084	0.13	0.045	-0.21	0.0018	-0.034	0.61	-0.047	0.48	-0.0087	0.9	-0.082	0.22	0.069	0.3	0.28	2.2e-05
FLVCR2	grey	-0.36	1.7e-08	0.36	1.7e-08	-0.099	0.13	-0.29	6.8e-06	-0.12	0.061	-0.034	0.61	0.22	0.00082	0.13	0.044	0.18	0.0052	0.34	1.1e-07	0.42	5.1e-11	0.42	3.6e-11
FMO1	grey	0.29	7.3e-06	-0.29	7.3e-06	0.26	5.9e-05	0.17	0.0087	0.2	0.0024	-0.36	3.5e-08	-0.31	1.8e-06	0.17	0.0083	0.18	0.0054	-0.032	0.63	-0.17	0.012	-0.44	2.2e-12
FMO2	grey	0.33	2.3e-07	-0.33	2.3e-07	0.2	0.0026	0.3	4.8e-06	0.5	7e-16	-0.47	7.4e-14	-0.53	8.8e-18	-0.18	0.0055	0.13	0.058	-0.27	2.6e-05	-0.32	1.1e-06	-0.39	6.4e-10
FMO3	grey	-0.041	0.53	0.041	0.53	-0.21	0.0012	-0.036	0.59	0.1	0.12	0.058	0.39	-0.28	2.5e-05	-0.21	0.0016	0.29	8.3e-06	0.021	0.75	0.037	0.58	-0.21	0.0011
FNBP1L	grey	-0.027	0.68	0.027	0.68	0.12	0.08	0.32	1.1e-06	-0.18	0.0063	0.084	0.21	0.15	0.024	0.29	6.7e-06	-0.36	1.9e-08	-0.11	0.092	-0.25	0.00013	-0.17	0.0093
FOLR3	grey	-0.3	5.2e-06	0.3	5.2e-06	-0.077	0.25	-0.22	0.00066	-0.41	2e-10	0.2	0.0019	0.62	4.3e-26	0.29	9.4e-06	-0.23	0.00038	0.14	0.036	0.19	0.0036	0.51	2.2e-16
FOS	grey	-0.33	3.1e-07	0.33	3.1e-07	-0.19	0.0049	0.0073	0.91	-0.25	0.00011	0.21	0.0011	0.31	2e-06	0.18	0.0068	-0.063	0.34	0.17	0.012	0.2	0.0026	0.2	0.0019
FOSB	grey	-0.15	0.019	0.15	0.019	-0.12	0.069	0.12	0.073	-0.013	0.85	0.02	0.76	0.092	0.16	0.057	0.39	-0.086	0.19	0.0096	0.88	0.037	0.58	0.078	0.24
FOXA1	grey	0.33	4.5e-07	-0.33	4.5e-07	-0.052	0.44	0.52	2.5e-17	0.37	9.3e-09	-0.011	0.87	-0.52	1.8e-17	-0.42	2.8e-11	0.012	0.86	-0.3	3.4e-06	-0.32	1e-06	-0.54	1e-18
FOXC1	grey	0.29	7e-06	-0.29	7e-06	0.24	0.00026	0.51	9.8e-17	0.2	0.0019	-0.41	1.6e-10	-0.2	0.002	0.033	0.62	-0.19	0.0034	-0.17	0.0094	-0.29	7.2e-06	-0.32	7.2e-07
FOXE1	grey	0.1	0.12	-0.1	0.12	-0.24	0.00033	-0.088	0.18	0.26	5.3e-05	0.25	0.00011	-0.28	2.4e-05	-0.4	6e-10	0.035	0.6	-0.23	0.00052	-0.089	0.18	-0.065	0.33
FOXF1	grey	-0.032	0.64	0.032	0.64	0.11	0.11	0.043	0.52	-0.0028	0.97	-0.4	2.8e-10	-0.16	0.014	0.28	2e-05	0.3	4e-06	0.17	0.0089	-0.0054	0.94	-0.28	2.3e-05
FOXF2	grey	-0.095	0.15	0.095	0.15	0.085	0.2	0.06	0.36	-0.19	0.004	-0.16	0.019	0.35	5.1e-08	0.46	3e-13	-0.19	0.0039	0.12	0.083	0.032	0.63	0.23	0.00058
FOXG1	grey	0.19	0.0047	-0.19	0.0047	-0.025	0.71	0.32	1.1e-06	0.17	0.011	0.026	0.7	-0.27	3.2e-05	-0.23	0.00057	-0.11	0.09	-0.26	6.5e-05	-0.2	0.0021	-0.33	2.8e-07
FOXL2	grey	-0.15	0.023	0.15	0.023	-0.11	0.11	-0.19	0.0035	-0.22	0.00086	0.26	7.1e-05	0.28	1.9e-05	0.099	0.14	-0.11	0.092	0.17	0.0082	0.19	0.0042	0.24	0.00029
FOXQ1	grey	-0.29	1.1e-05	0.29	1.1e-05	-0.25	0.00016	0.047	0.48	-0.23	0.00038	0.23	0.00041	0.085	0.2	0.042	0.53	0.12	0.078	0.12	0.069	0.17	0.0086	-0.012	0.86
FREM2	grey	-0.076	0.25	0.076	0.25	0.31	2.2e-06	0.054	0.41	-0.14	0.041	-0.037	0.58	0.11	0.094	0.29	1e-05	-0.2	0.0023	-0.00086	0.99	-0.14	0.037	-0.034	0.61
FRK	grey	0.21	0.0014	-0.21	0.0014	-0.12	0.08	0.21	0.0015	0.29	7.6e-06	0.15	0.023	-0.3	3.2e-06	-0.32	9.9e-07	-0.18	0.0053	-0.33	5.1e-07	-0.24	0.00034	-0.24	0.00031
FRMD6	grey	-0.056	0.4	0.056	0.4	-0.12	0.066	-0.12	0.06	-0.089	0.18	0.16	0.013	0.37	7.1e-09	0.34	1.4e-07	-0.35	6.5e-08	-0.078	0.24	-0.08	0.23	0.33	4e-07
FTX	grey	0.044	0.51	-0.044	0.51	0.2	0.0021	0.11	0.11	-0.03	0.65	-0.25	0.00014	-0.21	0.0015	0.12	0.074	0.21	0.0013	0.049	0.46	-0.09	0.18	-0.37	9e-09
FUT1	grey	-0.31	2e-06	0.31	2e-06	-0.3	5.8e-06	-0.29	7.4e-06	-0.045	0.49	0.21	0.0014	0.26	9.2e-05	-0.14	0.029	-0.21	0.0016	-0.062	0.35	0.22	0.00079	0.56	2.8e-20
FXYD3	grey	-0.1	0.12	0.1	0.12	-0.21	0.0017	0.07	0.29	0.14	0.04	0.17	0.0082	-0.14	0.037	-0.32	9e-07	-0.14	0.031	-0.15	0.02	0.069	0.3	0.092	0.17
FXYD6	grey	0.39	1.3e-09	-0.39	1.3e-09	0.44	3.9e-12	0.33	3.1e-07	0.28	2.1e-05	-0.46	2.6e-13	-0.52	5.9e-17	0.084	0.2	0.1	0.12	-0.17	0.0089	-0.41	8.3e-11	-0.71	5.1e-36
FZD10	grey	0.19	0.0045	-0.19	0.0045	0.0037	0.96	0.033	0.62	0.37	1.4e-08	-0.082	0.22	-0.14	0.039	-0.21	0.0016	-0.29	1.2e-05	-0.36	2.8e-08	-0.28	2.1e-05	0.14	0.04
FZD6	grey	-0.41	1.3e-10	0.41	1.3e-10	-0.29	7.6e-06	-0.14	0.034	-0.43	1.9e-11	0.49	5.3e-15	0.56	7.8e-20	0.28	1.4e-05	-0.3	5.5e-06	0.13	0.048	0.19	0.0049	0.42	4.3e-11
FZD7	grey	0.15	0.025	-0.15	0.025	0.25	0.00018	0.22	0.00087	0.031	0.64	-0.18	0.0058	-0.17	0.011	0.28	2.2e-05	-0.096	0.15	-0.1	0.13	-0.38	2.1e-09	-0.43	1.7e-11
FZD8	grey	-0.23	0.00055	0.23	0.00055	-0.017	0.8	0.072	0.28	-0.4	3.1e-10	0.2	0.0025	0.23	0.00035	0.36	2.1e-08	-0.079	0.23	0.12	0.076	-0.052	0.44	-0.13	0.044
G0S2	grey	-0.24	0.00027	0.24	0.00027	0.0097	0.88	-0.12	0.082	-0.43	8.6e-12	0.22	0.00067	0.5	4.1e-16	0.31	1.8e-06	-0.074	0.26	0.39	1.7e-09	0.16	0.013	0.23	0.00061
G6PD	grey	0.031	0.64	-0.031	0.64	-0.1	0.13	-0.048	0.47	0.25	0.0001	-0.11	0.088	-0.057	0.39	-0.18	0.006	-0.21	0.0016	-0.12	0.076	-0.1	0.13	0.27	4e-05
GABPB1-AS1	grey	-0.00044	0.99	0.00044	0.99	-0.11	0.1	-0.042	0.52	-0.095	0.15	0.059	0.37	-0.091	0.17	0.0088	0.9	0.31	1.4e-06	0.17	0.0085	0.11	0.11	-0.22	0.00078
GABRE	grey	-0.21	0.0018	0.21	0.0018	-0.17	0.01	-0.14	0.04	0.039	0.56	0.18	0.0055	-0.011	0.87	-0.094	0.16	-0.089	0.18	-0.0061	0.93	0.066	0.32	0.15	0.024
GAGE12I	grey	-0.098	0.14	0.098	0.14	-0.1	0.13	-0.041	0.54	-0.097	0.14	0.088	0.19	0.1	0.12	0.14	0.036	-0.097	0.14	0.039	0.56	0.053	0.43	0.072	0.28
GAL	grey	-0.16	0.014	0.16	0.014	-0.14	0.036	-0.077	0.24	-0.18	0.0075	0.2	0.0028	0.26	7.9e-05	0.052	0.43	-0.18	0.0062	0.059	0.37	-0.012	0.86	0.23	0.00044
GALNT1	grey	0.45	7.2e-13	-0.45	7.2e-13	-0.0049	0.94	0.2	0.0029	0.57	4.9e-21	-0.34	1.2e-07	-0.36	1.9e-08	-0.23	0.00061	-0.16	0.018	-0.35	4.7e-08	-0.38	3.6e-09	-0.074	0.27
GALNT11	grey	0.14	0.029	-0.14	0.029	0.16	0.015	0.15	0.024	0.1	0.12	-0.22	0.00072	-0.25	0.00018	0.01	0.88	0.011	0.87	-0.099	0.13	-0.2	0.0031	-0.35	6.8e-08
GALNT14	grey	-0.036	0.59	0.036	0.59	-0.24	0.00025	-0.076	0.26	-0.091	0.17	0.38	3.9e-09	0.15	0.021	-0.057	0.39	-0.11	0.11	0.033	0.62	0.061	0.36	0.074	0.26
GAREM1	grey	0.16	0.017	-0.16	0.017	-0.032	0.63	0.19	0.005	0.39	1.5e-09	-0.088	0.19	-0.22	0.00074	-0.29	1.2e-05	-0.36	2.6e-08	-0.41	1.1e-10	-0.31	1.4e-06	0.14	0.041
GBP3	grey	-0.1	0.13	0.1	0.13	-0.03	0.65	-0.14	0.03	-0.18	0.0058	0.022	0.74	0.15	0.022	0.12	0.074	0.17	0.011	0.27	4.8e-05	0.41	1e-10	0.054	0.42
GCH1	grey	0.059	0.37	-0.059	0.37	-0.32	1.2e-06	-0.2	0.0025	0.15	0.022	0.15	0.022	-0.3	4e-06	-0.4	3.8e-10	0.51	2.2e-16	0.26	6.2e-05	0.36	3.4e-08	-0.17	0.01
GCLC	grey	-0.24	0.00026	0.24	0.00026	-0.17	0.011	-0.088	0.19	-0.12	0.078	0.22	0.00085	0.13	0.051	0.02	0.76	-0.064	0.34	0.077	0.24	0.076	0.25	0.17	0.0088
GCLM	grey	-0.19	0.0044	0.19	0.0044	-0.12	0.076	-0.11	0.099	-0.23	0.00046	0.23	0.00061	0.15	0.021	0.12	0.069	0.061	0.36	0.18	0.0063	0.062	0.35	0.018	0.79
GCNA	grey	-0.21	0.0016	0.21	0.0016	-0.04	0.55	-0.23	0.00051	-0.14	0.035	0.0045	0.95	0.24	0.00032	0.068	0.31	0.054	0.42	0.15	0.023	0.15	0.021	0.35	5.3e-08
GCNT2	grey	0.28	1.3e-05	-0.28	1.3e-05	-0.071	0.28	0.29	1.1e-05	0.29	6.5e-06	-0.031	0.64	-0.48	1.7e-14	-0.28	1.4e-05	0.14	0.04	-0.17	0.0091	-0.29	6.2e-06	-0.52	4.5e-17
GDA	grey	-0.11	0.088	0.11	0.088	-0.093	0.16	-0.084	0.2	0.1	0.13	0.018	0.79	-0.11	0.1	-0.13	0.055	0.042	0.53	-0.11	0.088	-0.067	0.31	0.048	0.47
GDAP1	grey	-0.073	0.28	0.073	0.28	-0.12	0.063	-0.14	0.037	-0.14	0.033	0.21	0.0013	0.24	0.00025	0.046	0.49	-0.08	0.23	0.12	0.072	0.067	0.31	0.2	0.0022
GDPD2	grey	-0.23	0.00036	0.23	0.00036	-0.12	0.062	-0.13	0.053	0.0078	0.91	0.0074	0.91	0.28	2.5e-05	-0.11	0.11	-0.29	6.2e-06	-0.16	0.018	0.073	0.28	0.61	8.9e-25
GGH	grey	-0.39	6.3e-10	0.39	6.3e-10	-0.32	6.5e-07	-0.33	2.2e-07	-0.17	0.011	0.35	3.7e-08	0.31	2e-06	0.041	0.53	-0.092	0.16	0.08	0.23	0.24	0.00022	0.48	2.2e-14
GHR	grey	0.17	0.0091	-0.17	0.0091	0.27	3.4e-05	0.29	6.4e-06	0.22	0.00085	-0.27	2.8e-05	-0.2	0.0021	0.031	0.65	-0.24	0.00025	-0.27	5e-05	-0.36	1.8e-08	-0.12	0.063
GIPC2	grey	0.14	0.031	-0.14	0.031	0.088	0.19	0.11	0.11	0.32	5.9e-07	-0.063	0.34	-0.41	9.8e-11	-0.28	1.6e-05	-0.062	0.35	-0.32	7.9e-07	-0.31	1.8e-06	-0.27	3.5e-05
GJB2	grey	0.016	0.81	-0.016	0.81	-0.14	0.036	-0.18	0.0072	0.26	8.6e-05	-0.074	0.27	0.17	0.01	-0.14	0.04	-0.29	1.2e-05	-0.23	0.00052	0.0076	0.91	0.6	2.6e-23
GJB5	grey	0.027	0.69	-0.027	0.69	-0.21	0.0013	-0.14	0.034	0.26	9.1e-05	0.21	0.0012	0.2	0.0022	-0.32	1.1e-06	-0.53	5.6e-18	-0.39	1.4e-09	-0.067	0.31	0.6	6.3e-24
GJB6	grey	-0.012	0.86	0.012	0.86	-0.11	0.097	-0.17	0.01	0.22	0.00099	-0.11	0.11	0.22	0.00064	-0.047	0.48	-0.31	1.3e-06	-0.19	0.004	0.0079	0.91	0.63	3.2e-26
GK3P	grey	-0.21	0.0012	0.21	0.0012	-0.34	1.3e-07	-0.15	0.024	-0.27	3.6e-05	0.3	3.4e-06	0.24	0.00021	0.072	0.28	0.18	0.008	0.46	3.4e-13	0.27	3.2e-05	0.13	0.044
GLCE	grey	0.37	5.2e-09	-0.37	5.2e-09	0.06	0.37	0.25	0.0001	0.39	8.4e-10	-0.092	0.17	-0.33	3.1e-07	-0.26	7.8e-05	-0.28	1.6e-05	-0.42	6e-11	-0.41	9.5e-11	-0.25	0.00013
GLDC	grey	-0.18	0.007	0.18	0.007	-0.2	0.002	-0.12	0.068	-0.2	0.0019	0.18	0.0072	0.2	0.0022	-0.00085	0.99	0.17	0.009	0.28	1.3e-05	0.32	5.6e-07	0.2	0.0021
GLIDR	grey	0.53	1e-17	-0.53	1e-17	0.27	4.6e-05	0.22	0.00071	0.57	1.1e-20	-0.47	9.6e-14	-0.56	1.4e-20	-0.28	1.4e-05	-0.013	0.84	-0.38	2.6e-09	-0.43	1.6e-11	-0.38	4.1e-09
GLUL	grey	-0.15	0.027	0.15	0.027	-0.13	0.051	-0.053	0.42	-0.043	0.52	0.027	0.68	-0.12	0.064	0.035	0.6	0.33	3.4e-07	0.29	7.7e-06	0.11	0.1	-0.15	0.021
GM2A	grey	-0.35	5e-08	0.35	5e-08	-0.41	2e-10	-0.42	2.1e-11	-0.057	0.39	0.24	0.00023	0.27	4.3e-05	-0.095	0.15	-0.0011	0.99	0.18	0.0071	0.38	2.1e-09	0.63	2.2e-26
GNAI1	grey	-0.44	5.4e-12	0.44	5.4e-12	-0.28	2.3e-05	-0.15	0.019	-0.25	0.00018	0.27	3.7e-05	0.55	2.9e-19	0.14	0.033	-0.36	2e-08	0.048	0.47	0.23	0.00045	0.74	4.5e-41
GNAL	grey	0.11	0.1	-0.11	0.1	-0.03	0.65	0.099	0.14	0.15	0.023	-0.024	0.72	-0.17	0.012	-0.16	0.016	-0.12	0.075	-0.24	0.00026	-0.22	0.00089	-0.11	0.085
GNG12	grey	0.068	0.3	-0.068	0.3	-0.062	0.35	-0.067	0.31	0.19	0.004	0.075	0.26	0.12	0.075	-0.12	0.07	-0.45	5.3e-13	-0.32	1.1e-06	-0.21	0.0014	0.38	2.3e-09
GNPNAT1	grey	-0.43	1.4e-11	0.43	1.4e-11	-0.21	0.0016	-0.037	0.57	-0.44	2.2e-12	0.32	5.6e-07	0.59	5.5e-23	0.24	0.00022	-0.21	0.0016	0.17	0.01	0.25	0.00012	0.52	5.2e-17
GOLGA2P10	grey	0.28	1.9e-05	-0.28	1.9e-05	0.078	0.24	0.25	0.00011	0.53	2.9e-18	-0.26	7.4e-05	-0.39	1.8e-09	-0.37	5.8e-09	-0.32	8.9e-07	-0.51	1.3e-16	-0.31	1.2e-06	-0.02	0.76
GOLGA7B	grey	-0.33	3.2e-07	0.33	3.2e-07	-0.17	0.009	-0.25	0.0001	-0.24	0.00023	0.092	0.17	0.53	1.3e-17	0.12	0.062	-0.3	5.1e-06	0.026	0.69	0.2	0.0031	0.71	1.4e-36
GOLGA8A	grey	0.18	0.0055	-0.18	0.0055	0.085	0.2	0.084	0.21	0.21	0.0015	-0.06	0.36	-0.42	2.5e-11	-0.2	0.002	0.14	0.037	-0.19	0.0033	-0.3	3.9e-06	-0.39	1.1e-09
GORAB	grey	-0.33	4.2e-07	0.33	4.2e-07	-0.24	0.00026	-0.17	0.0087	-0.44	4.9e-12	0.41	8.4e-11	0.13	0.042	0.21	0.0011	0.28	2e-05	0.32	6.7e-07	0.26	6.9e-05	-0.19	0.0036
GP2	grey	0.11	0.1	-0.11	0.1	-0.0029	0.97	0.56	2.7e-20	0.11	0.088	-0.18	0.0069	-0.21	0.0014	-0.17	0.011	-0.098	0.14	-0.21	0.0017	-0.2	0.0021	-0.27	4.8e-05
GPAM	grey	0.13	0.056	-0.13	0.056	0.18	0.0062	0.18	0.0077	0.046	0.49	0.055	0.41	0.01	0.88	0.059	0.38	-0.33	2.8e-07	-0.28	1.9e-05	-0.32	7.1e-07	-0.047	0.48
GPAT2	grey	-0.034	0.61	0.034	0.61	0.094	0.16	0.083	0.21	-0.03	0.65	-0.037	0.57	-0.15	0.029	0.048	0.47	0.14	0.039	0.04	0.55	0.00016	1	-0.27	4.5e-05
GPC1	grey	-0.22	0.00072	0.22	0.00072	-0.056	0.4	-0.16	0.015	-0.15	0.026	0.23	0.00044	0.38	2.1e-09	0.21	0.0015	-0.5	1.3e-15	-0.12	0.073	-0.11	0.11	0.42	4.3e-11
GPC3	grey	0.2	0.0019	-0.2	0.0019	0.37	5.7e-09	0.22	0.00072	0.26	8.8e-05	-0.39	7.7e-10	-0.37	9.7e-09	0.062	0.35	-0.0039	0.95	-0.24	0.00021	-0.41	1.6e-10	-0.41	9e-11
GPC4	grey	-0.16	0.014	0.16	0.014	0.22	0.0009	0.0068	0.92	-0.38	3.3e-09	0.024	0.72	0.38	4.1e-09	0.55	1.4e-19	-0.087	0.19	0.23	0.00045	0.04	0.55	0.0057	0.93
GPCPD1	grey	-0.17	0.0093	0.17	0.0093	-0.15	0.021	-0.14	0.033	-0.14	0.035	0.09	0.17	0.073	0.27	0.011	0.87	0.17	0.0082	0.21	0.0017	0.14	0.034	0.057	0.39
GPNMB	grey	-0.58	4e-22	0.58	4e-22	-0.23	0.00058	-0.26	8.1e-05	-0.55	1.5e-19	0.39	1.2e-09	0.48	2.5e-14	0.45	5.8e-13	-0.023	0.74	0.4	3.9e-10	0.31	1.6e-06	0.25	0.00018
GPR15	grey	-0.063	0.34	0.063	0.34	-0.21	0.0012	0.036	0.59	0.1	0.12	0.049	0.46	-0.24	0.00021	-0.28	2e-05	0.34	1.9e-07	0.017	0.8	0.11	0.094	-0.16	0.019
GPR158	grey	-0.41	1.3e-10	0.41	1.3e-10	-0.24	0.00033	-0.23	0.00054	-0.43	7.3e-12	0.28	1.3e-05	0.56	3.2e-20	0.29	1e-05	-0.12	0.073	0.28	1.9e-05	0.34	2.2e-07	0.48	2.3e-14
GPR160	grey	0.094	0.16	-0.094	0.16	-0.15	0.024	0.33	3.8e-07	0.065	0.33	-0.033	0.62	-0.32	7.6e-07	-0.17	0.01	0.49	2.2e-15	0.18	0.0073	0.031	0.64	-0.45	1.2e-12
GPR27	grey	0.22	0.00091	-0.22	0.00091	0.095	0.15	0.27	4.1e-05	0.23	0.00051	-0.14	0.04	-0.26	5.9e-05	-0.11	0.11	-0.12	0.06	-0.14	0.031	-0.28	1.5e-05	-0.27	2.6e-05
GPR37	grey	-0.21	0.0015	0.21	0.0015	-0.23	0.00037	-0.22	0.00066	-0.084	0.21	0.18	0.0057	0.27	4.2e-05	-0.059	0.38	-0.17	0.012	0.057	0.39	0.18	0.0067	0.46	3.3e-13
GPR87	grey	-0.16	0.016	0.16	0.016	-0.31	1.7e-06	-0.3	4.9e-06	0.002	0.98	0.49	1.9e-15	0.23	0.00038	-0.15	0.025	-0.34	2.1e-07	-0.14	0.037	0.035	0.6	0.43	1.1e-11
GPRASP2	grey	0.45	5.2e-13	-0.45	5.2e-13	0.38	2.1e-09	0.53	7.2e-18	0.46	2.9e-13	-0.44	1.8e-12	-0.5	1.3e-15	-0.09	0.18	-0.24	0.00027	-0.48	1.7e-14	-0.59	4.5e-23	-0.53	1.3e-17
GPRC5A	grey	0.22	0.00085	-0.22	0.00085	-0.03	0.65	0.11	0.11	0.25	0.00012	-0.019	0.78	0.11	0.1	-0.17	0.0084	-0.41	1.6e-10	-0.21	0.0018	-0.17	0.0089	0.28	1.5e-05
GPRC5D	grey	0.15	0.025	-0.15	0.025	-0.071	0.29	0.25	0.00015	0.24	0.00026	-0.036	0.59	-0.18	0.0074	-0.24	0.0003	-0.18	0.006	-0.24	0.00024	-0.24	0.0002	-0.062	0.35
GPSM2	grey	0.046	0.49	-0.046	0.49	0.034	0.61	-0.18	0.0063	0.17	0.011	0.14	0.029	0.14	0.041	-0.18	0.0068	-0.47	3.7e-14	-0.36	3.2e-08	-0.091	0.17	0.45	1.7e-12
GPX2	grey	-0.19	0.0036	0.19	0.0036	-0.055	0.41	-0.0028	0.97	0.05	0.45	0.078	0.24	-0.0038	0.95	-0.046	0.49	-0.21	0.0013	-0.14	0.031	-0.12	0.067	0.16	0.016
GRAMD2B	grey	0.53	4.8e-18	-0.53	4.8e-18	0.23	0.00036	0.43	6.4e-12	0.48	1.7e-14	-0.43	8e-12	-0.54	8.6e-19	-0.22	0.00096	0.12	0.065	-0.25	0.00014	-0.31	1.3e-06	-0.54	5.4e-19
GRB10	grey	-0.28	2.5e-05	0.28	2.5e-05	0.25	0.00014	0.11	0.096	-0.43	1.2e-11	0.055	0.41	0.35	4e-08	0.48	2.6e-14	-0.26	5.4e-05	0.12	0.068	-0.061	0.36	-0.0038	0.95
GRB7	grey	0.35	6.8e-08	-0.35	6.8e-08	-0.066	0.32	0.15	0.024	0.57	3.7e-21	-0.056	0.4	-0.43	1.4e-11	-0.53	1.3e-17	-0.27	4.6e-05	-0.47	3.7e-14	-0.33	5e-07	-0.1	0.12
GRHL2	grey	0.2	0.0029	-0.2	0.0029	-0.042	0.53	0.16	0.015	0.41	1.1e-10	0.068	0.3	-0.29	8e-06	-0.42	4.2e-11	-0.46	1.7e-13	-0.57	4.3e-21	-0.36	2.9e-08	-0.0055	0.93
GRPEL2	grey	0.23	0.00046	-0.23	0.00046	-0.11	0.1	-0.082	0.22	0.47	3.7e-14	-0.15	0.026	-0.17	0.0083	-0.36	2.1e-08	-0.23	0.00048	-0.34	9.5e-08	-0.21	0.0013	0.27	4.7e-05
GRTP1	grey	0.27	4.1e-05	-0.27	4.1e-05	-0.19	0.0034	0.13	0.056	0.42	4.7e-11	0.097	0.14	-0.39	9e-10	-0.52	4.8e-17	-0.21	0.0012	-0.38	4.8e-09	-0.24	0.00033	-0.13	0.056
GSDMC	grey	0.051	0.44	-0.051	0.44	-0.076	0.25	-0.17	0.011	0.27	2.6e-05	-0.064	0.34	0.18	0.0053	-0.17	0.013	-0.38	2.4e-09	-0.27	2.6e-05	0.016	0.81	0.63	4.2e-27
GSPT2	grey	0.11	0.094	-0.11	0.094	0.21	0.0011	0.27	5e-05	-0.018	0.79	-0.3	3e-06	-0.26	9.5e-05	0.19	0.0038	0.41	8.7e-11	0.12	0.066	-0.12	0.079	-0.53	1.1e-17
GSR	grey	0.23	0.00056	-0.23	0.00056	-0.053	0.43	0.19	0.0033	0.29	9.9e-06	0.034	0.61	-0.45	1.2e-12	-0.37	8.4e-09	0.073	0.27	-0.17	0.011	-0.25	0.00017	-0.39	1.7e-09
GSTA1	grey	0.37	9.4e-09	-0.37	9.4e-09	0.036	0.59	0.5	6.4e-16	0.5	1.6e-15	-0.32	1.1e-06	-0.51	1.5e-16	-0.32	6.1e-07	-0.098	0.14	-0.4	6e-10	-0.41	7.8e-11	-0.39	8.8e-10
GSTM1	grey	0.15	0.027	-0.15	0.027	0.088	0.18	0.12	0.078	0.21	0.0014	-0.16	0.013	-0.29	1.2e-05	-0.16	0.016	-0.0081	0.9	-0.16	0.016	-0.21	0.0011	-0.2	0.003
GSTM2	grey	0.16	0.017	-0.16	0.017	0.1	0.11	0.15	0.028	0.23	0.00055	-0.2	0.0024	-0.31	2.3e-06	-0.14	0.032	-0.0036	0.96	-0.17	0.012	-0.24	0.00033	-0.22	0.00075
GSTM3	grey	0.18	0.0057	-0.18	0.0057	0.13	0.051	0.26	5.7e-05	0.3	4.1e-06	-0.25	0.00013	-0.28	2.2e-05	-0.089	0.18	-0.23	0.00061	-0.32	9.9e-07	-0.4	4.5e-10	-0.15	0.023
GSTM4	grey	0.24	0.00022	-0.24	0.00022	0.0027	0.97	0.12	0.06	0.32	8.8e-07	-0.094	0.16	-0.39	1.2e-09	-0.29	1.1e-05	-0.009	0.89	-0.18	0.0053	-0.27	2.6e-05	-0.25	0.00015
GSTO2	grey	0.29	1.1e-05	-0.29	1.1e-05	0.15	0.026	0.23	0.00045	0.45	6.9e-13	-0.22	0.00073	-0.23	0.0006	-0.27	5e-05	-0.44	4.7e-12	-0.5	1.1e-15	-0.37	1.2e-08	0.054	0.41
GSTP1	grey	0.034	0.61	-0.034	0.61	-0.23	0.00041	-0.041	0.53	0.15	0.021	0.25	0.00013	0.16	0.014	-0.24	0.00032	-0.41	1.7e-10	-0.27	3.9e-05	-0.086	0.2	0.42	5.5e-11
GSTT1	grey	0.2	0.003	-0.2	0.003	0.079	0.24	0.13	0.059	0.26	6.7e-05	-0.15	0.028	-0.23	0.00041	-0.14	0.035	-0.11	0.1	-0.22	0.00076	-0.25	0.00017	-0.15	0.024
GSTT2	grey	0.21	0.0011	-0.21	0.0011	0.19	0.0047	0.18	0.0058	0.18	0.0074	-0.23	0.0004	-0.17	0.011	-0.018	0.78	-0.1	0.13	-0.21	0.0012	-0.29	1.1e-05	-0.18	0.006
GSTZ1	grey	0.52	2.9e-17	-0.52	2.9e-17	0.15	0.024	0.29	6.1e-06	0.57	8.5e-21	-0.26	8.3e-05	-0.35	7.9e-08	-0.46	4.4e-13	-0.32	6.7e-07	-0.52	4.8e-17	-0.38	4.2e-09	-0.024	0.72
GTF2H2B	grey	0.00075	0.99	-0.00075	0.99	-0.03	0.66	-0.14	0.034	-0.23	0.00038	0.16	0.015	-0.034	0.61	0.12	0.072	0.35	5.4e-08	0.26	5.3e-05	0.15	0.023	-0.26	8.4e-05
GTF2H4	grey	-0.18	0.0052	0.18	0.0052	-0.074	0.26	-0.18	0.0058	-0.22	0.00087	0.22	0.00074	0.31	2.2e-06	0.15	0.024	-0.15	0.02	0.14	0.032	0.1	0.12	0.26	9.6e-05
GTSF1	grey	-0.23	0.00039	0.23	0.00039	-0.19	0.0037	-0.16	0.019	-0.3	5.8e-06	0.13	0.059	0.28	2.2e-05	0.22	0.00082	0.096	0.15	0.25	0.00012	0.22	0.00078	0.19	0.004
H1F0	grey	0.26	5.7e-05	-0.26	5.7e-05	0.051	0.45	0.11	0.088	0.31	1.3e-06	-0.11	0.11	-0.17	0.0087	-0.15	0.027	-0.21	0.0015	-0.23	0.00048	-0.23	0.00056	-0.039	0.56
H1FX	grey	-0.37	5.4e-09	0.37	5.4e-09	-0.27	4.3e-05	-0.2	0.0021	-0.38	3.3e-09	0.37	9.5e-09	0.12	0.062	0.23	0.0004	0.29	1.2e-05	0.39	1.4e-09	0.31	1.9e-06	-0.13	0.057
H2BFS	grey	-0.42	2.6e-11	0.42	2.6e-11	-0.28	1.8e-05	-0.34	9.3e-08	-0.37	1.2e-08	0.51	1.6e-16	0.46	2.1e-13	0.19	0.0047	-0.14	0.038	0.14	0.041	0.34	2e-07	0.45	1.1e-12
HACD1	grey	-0.34	1.2e-07	0.34	1.2e-07	0.018	0.79	-0.28	2.5e-05	-0.32	6.7e-07	0.16	0.014	0.6	2e-23	0.3	3e-06	-0.26	5.8e-05	0.18	0.006	0.23	0.00047	0.61	3e-24
HACD2	grey	-0.13	0.045	0.13	0.045	-0.26	6.5e-05	-0.14	0.033	-0.14	0.038	0.4	4.5e-10	0.31	1.3e-06	0.043	0.52	-0.25	0.00017	-0.036	0.59	0.082	0.22	0.37	1.1e-08
HACE1	grey	0.48	1.4e-14	-0.48	1.4e-14	0.085	0.2	0.25	0.00011	0.53	3.3e-18	-0.24	0.00026	-0.47	9.4e-14	-0.23	0.00035	-0.24	0.00019	-0.45	7.8e-13	-0.5	4.1e-16	-0.33	3.3e-07
HADH	grey	0.32	9.4e-07	-0.32	9.4e-07	0.3	3.4e-06	0.28	2.5e-05	0.39	1.4e-09	-0.063	0.34	-0.55	1.5e-19	-0.39	1.3e-09	-0.12	0.078	-0.47	9.3e-14	-0.39	9.3e-10	-0.45	1.4e-12
HAL	grey	-0.18	0.0077	0.18	0.0077	-0.061	0.36	-0.19	0.0034	0.15	0.025	-0.2	0.0026	-0.013	0.85	-0.084	0.21	0.052	0.43	-0.005	0.94	0.14	0.03	0.36	3.2e-08
HBA1	grey	0.37	7.5e-09	-0.37	7.5e-09	0.3	3.1e-06	0.32	6.7e-07	0.27	4e-05	-0.33	4.7e-07	-0.25	0.00017	-0.087	0.19	-0.18	0.0071	-0.26	8.8e-05	-0.33	3e-07	-0.3	5.6e-06
HBB	grey	0.38	1.9e-09	-0.38	1.9e-09	0.3	5e-06	0.32	5.6e-07	0.28	2.1e-05	-0.33	4.8e-07	-0.26	8.1e-05	-0.1	0.12	-0.17	0.011	-0.27	3.9e-05	-0.33	4.3e-07	-0.3	4.9e-06
HBEGF	grey	-0.14	0.038	0.14	0.038	-0.25	0.00015	-0.06	0.37	0.00066	0.99	0.18	0.0072	0.33	2.8e-07	-0.054	0.42	-0.35	6.2e-08	-0.035	0.6	0.068	0.31	0.47	1.1e-13
HBG1	grey	0.33	2.6e-07	-0.33	2.6e-07	0.36	2.3e-08	0.32	1.2e-06	0.22	0.00067	-0.34	1.2e-07	-0.24	0.00028	-0.094	0.16	-0.17	0.009	-0.26	5.2e-05	-0.28	1.3e-05	-0.26	8.7e-05
HCAR3	grey	0.21	0.0018	-0.21	0.0018	-0.2	0.002	-0.082	0.22	0.28	1.3e-05	0.14	0.034	-0.14	0.034	-0.38	1.9e-09	-0.037	0.58	0.00027	1	-0.061	0.36	0.065	0.33
HCG11	grey	-0.028	0.67	0.028	0.67	0.035	0.6	0.14	0.039	-0.044	0.51	0.035	0.6	-0.16	0.017	0.066	0.32	0.1	0.13	-0.065	0.33	-0.17	0.0098	-0.31	2.2e-06
HCG4	grey	-0.25	0.00017	0.25	0.00017	-0.17	0.01	-0.15	0.022	-0.33	3.9e-07	0.28	1.7e-05	0.58	3.2e-22	0.18	0.0073	-0.28	2.4e-05	0.081	0.22	0.24	0.00024	0.55	1.1e-19
HEG1	grey	-0.14	0.037	0.14	0.037	0.32	1.1e-06	-0.0086	0.9	-0.25	0.00018	-0.29	1.2e-05	0.1	0.13	0.58	6.5e-22	0.13	0.053	0.28	2e-05	0.069	0.3	-0.18	0.0077
HENMT1	grey	-0.55	8.6e-20	0.55	8.6e-20	-0.2	0.0023	-0.35	5.4e-08	-0.55	9.6e-20	0.48	1.8e-14	0.3	5.1e-06	0.17	0.0085	0.32	6.3e-07	0.4	3.6e-10	0.44	1.9e-12	0.09	0.17
HERC2P2	grey	0.028	0.68	-0.028	0.68	0.12	0.074	0.098	0.14	0.083	0.21	-0.16	0.017	-0.35	4.8e-08	-0.014	0.83	0.22	0.00081	0.032	0.63	-0.07	0.29	-0.39	8.6e-10
HES4	grey	-0.24	0.00026	0.24	0.00026	-0.017	0.8	-0.14	0.035	-0.31	1.3e-06	0.14	0.038	0.48	1.4e-14	0.37	6.9e-09	-0.23	0.00045	0.2	0.0022	0.22	0.00066	0.3	3.7e-06
HES5	grey	-0.15	0.026	0.15	0.026	-0.032	0.63	-0.14	0.035	0.19	0.0042	-0.12	0.066	0.043	0.52	-0.16	0.013	-0.23	0.00045	-0.26	8e-05	-0.0042	0.95	0.45	6.3e-13
HEY1	grey	-0.24	0.00025	0.24	0.00025	0.27	3.6e-05	0.22	0.0009	-0.38	3e-09	-0.068	0.31	0.17	0.012	0.57	2.8e-21	-0.012	0.86	0.18	0.0052	-0.02	0.76	-0.31	2.5e-06
HEY2	grey	-0.087	0.19	0.087	0.19	0.28	1.9e-05	0.1	0.13	-0.12	0.072	-0.14	0.039	0.12	0.066	0.46	3.4e-13	-0.28	2.3e-05	-0.11	0.11	-0.15	0.02	-0.084	0.21
HILPDA	grey	-0.074	0.26	0.074	0.26	-0.15	0.024	-0.12	0.06	-0.011	0.87	0.18	0.0069	0.24	0.00027	0.0086	0.9	-0.37	1.1e-08	-0.099	0.14	-0.1	0.12	0.37	1.2e-08
HINT3	grey	-0.02	0.77	0.02	0.77	-0.23	0.0004	0.079	0.23	-0.012	0.86	0.26	7.2e-05	0.068	0.3	-0.078	0.24	-0.06	0.37	-0.034	0.61	-3.4e-05	1	0.1	0.13
HIST1H1C	grey	-0.081	0.23	0.081	0.23	-0.024	0.72	-0.21	0.0012	-0.019	0.78	0.26	7.1e-05	0.0085	0.9	-0.062	0.35	-0.0064	0.92	-0.038	0.57	0.073	0.27	0.069	0.3
HIST1H2AC	grey	0.12	0.06	-0.12	0.06	-0.033	0.62	-0.15	0.024	0.25	0.00012	0.016	0.81	0.0029	0.97	-0.14	0.031	-0.2	0.002	-0.21	0.0018	0.019	0.78	0.28	1.6e-05
HIST1H2AD	grey	0.36	2.5e-08	-0.36	2.5e-08	-0.098	0.14	-0.12	0.064	0.36	1.9e-08	0.094	0.16	-0.1	0.12	-0.31	1.6e-06	-0.22	0.00087	-0.29	8.6e-06	-0.11	0.096	0.16	0.018
HIST1H2AE	grey	-0.11	0.11	0.11	0.11	-0.12	0.06	-0.24	0.00023	-0.084	0.2	0.26	5.1e-05	0.32	7e-07	0.074	0.27	-0.27	5e-05	-0.022	0.74	0.081	0.22	0.45	7.2e-13
HIST1H2AG	grey	-0.31	1.6e-06	0.31	1.6e-06	-0.22	0.0011	-0.33	4.4e-07	-0.37	7e-09	0.47	8.1e-14	0.35	4.2e-08	0.19	0.0039	0.034	0.6	0.22	0.00072	0.31	2.5e-06	0.25	0.00017
HIST1H2BC	grey	-0.17	0.01	0.17	0.01	-0.13	0.046	-0.25	0.00017	-0.17	0.011	0.23	0.00039	0.43	1.5e-11	0.16	0.013	-0.22	0.00073	0.11	0.11	0.28	1.3e-05	0.49	3.6e-15
HIST1H2BD	grey	-0.29	6.6e-06	0.29	6.6e-06	-0.16	0.017	-0.32	7.9e-07	-0.23	0.00044	0.36	2.5e-08	0.42	2.4e-11	0.16	0.015	-0.21	0.0013	0.059	0.38	0.27	4.6e-05	0.5	7.9e-16
HIST1H2BE	grey	-0.32	8.2e-07	0.32	8.2e-07	-0.24	0.00029	-0.32	7.2e-07	-0.27	4.3e-05	0.43	1.3e-11	0.43	6.9e-12	0.16	0.017	-0.2	0.0021	0.072	0.28	0.28	1.6e-05	0.48	1.1e-14
HIST1H2BF	grey	-0.28	1.9e-05	0.28	1.9e-05	-0.26	7e-05	-0.33	3.3e-07	-0.25	0.00014	0.46	2.4e-13	0.41	1.5e-10	0.1	0.13	-0.19	0.005	0.064	0.34	0.28	2.1e-05	0.46	1.9e-13
HIST1H2BI	grey	-0.32	9.9e-07	0.32	9.9e-07	-0.29	1.1e-05	-0.37	9.8e-09	-0.31	1.6e-06	0.52	2.8e-17	0.46	2.6e-13	0.1	0.12	-0.17	0.0085	0.09	0.18	0.31	2.5e-06	0.49	3.2e-15
HIST1H2BK	grey	-0.44	4.4e-12	0.44	4.4e-12	-0.26	6e-05	-0.33	2.8e-07	-0.37	6.1e-09	0.46	4.7e-13	0.43	7.6e-12	0.23	0.0005	-0.097	0.14	0.15	0.023	0.34	1.6e-07	0.39	7.5e-10
HIST1H4C	grey	0.21	0.0014	-0.21	0.0014	-0.06	0.37	-0.012	0.86	0.15	0.027	0.22	0.00094	-0.41	1.3e-10	-0.38	4.7e-09	0.21	0.0018	-0.11	0.11	-0.17	0.012	-0.42	4.2e-11
HIST1H4H	grey	-0.12	0.06	0.12	0.06	-0.042	0.53	-0.18	0.008	-0.12	0.071	0.22	0.0008	0.32	1.2e-06	0.12	0.064	-0.24	0.0003	-0.051	0.44	0.059	0.37	0.37	5.9e-09
HIST1H4J	grey	-0.44	2.2e-12	0.44	2.2e-12	-0.34	1.2e-07	-0.43	1.4e-11	-0.42	3.6e-11	0.44	4.2e-12	0.58	5.1e-22	0.29	5.9e-06	-0.087	0.19	0.29	7.4e-06	0.37	6.5e-09	0.57	9.6e-21
HIST2H2AA3	grey	-0.33	5.1e-07	0.33	5.1e-07	-0.21	0.0012	-0.29	1e-05	-0.25	0.00015	0.28	2.1e-05	0.5	6.2e-16	0.18	0.0071	-0.25	0.00019	0.17	0.01	0.39	1.2e-09	0.6	4.3e-24
HIST2H2BE	grey	0.022	0.75	-0.022	0.75	0.018	0.79	-0.026	0.69	0.2	0.0025	-0.077	0.25	0.092	0.17	-0.03	0.65	-0.32	8e-07	-0.19	0.0038	0.032	0.63	0.38	2.7e-09
HLA-DQB1	grey	-0.11	0.098	0.11	0.098	-0.14	0.035	-0.25	0.00014	-0.15	0.025	0.056	0.4	-0.0067	0.92	0.00088	0.99	0.5	8.7e-16	0.4	2.4e-10	0.43	1.2e-11	-0.019	0.78
HLA-DQB2	grey	0.19	0.0035	-0.19	0.0035	-0.052	0.43	-0.11	0.11	0.25	0.00017	-0.12	0.062	-0.34	2.2e-07	-0.21	0.0015	0.26	5.2e-05	-0.055	0.41	-0.0065	0.92	-0.18	0.0052
HLA-DRB4	grey	-0.0084	0.9	0.0084	0.9	-0.011	0.87	-0.033	0.62	-0.008	0.9	0.00078	0.99	-0.16	0.017	-0.04	0.55	0.33	2.8e-07	0.18	0.0073	0.11	0.085	-0.22	0.00081
HMGN3	grey	0.32	9.5e-07	-0.32	9.5e-07	0.13	0.057	0.19	0.0046	0.38	1.9e-09	-0.15	0.027	-0.63	7.7e-27	-0.4	5.7e-10	0.1	0.12	-0.33	2.5e-07	-0.29	6.4e-06	-0.56	2.4e-20
HMOX1	grey	0.044	0.51	-0.044	0.51	-0.081	0.22	-0.2	0.0019	0.2	0.0026	-0.26	6.7e-05	-0.037	0.58	0.021	0.76	0.2	0.0028	0.23	0.00058	0.08	0.23	0.15	0.022
HOMER1	grey	-0.39	1.4e-09	0.39	1.4e-09	-0.039	0.56	-0.33	3.3e-07	-0.36	2.2e-08	0.25	0.00016	0.64	4.5e-28	0.29	7.2e-06	-0.37	7.5e-09	0.12	0.072	0.24	0.00034	0.7	7.3e-35
HOMER2	grey	0.022	0.74	-0.022	0.74	0.14	0.038	0.19	0.005	0.16	0.014	-0.18	0.008	0.14	0.041	-0.028	0.67	-0.47	1e-13	-0.31	1.5e-06	-0.18	0.0055	0.38	2.1e-09
HORMAD1	grey	-0.17	0.0082	0.17	0.0082	-0.16	0.019	-0.072	0.28	-0.15	0.023	0.24	0.00021	0.2	0.003	0.065	0.33	-0.089	0.18	0.03	0.65	0.078	0.24	0.17	0.0085
HOTAIRM1	grey	-0.032	0.64	0.032	0.64	-0.15	0.028	-0.067	0.32	-0.23	0.00049	0.16	0.019	0.25	0.00015	0.1	0.12	0.072	0.28	0.24	0.00025	0.11	0.086	0.061	0.36
HOTS	grey	0.35	6.4e-08	-0.35	6.4e-08	0.44	5.2e-12	0.22	0.00098	0.35	7.9e-08	-0.33	3e-07	-0.27	4.3e-05	-0.052	0.44	-0.2	0.0021	-0.38	3.1e-09	-0.44	2.1e-12	-0.2	0.002
HOXA1	grey	-0.12	0.078	0.12	0.078	-0.19	0.0043	-0.065	0.33	-0.18	0.0075	0.26	7.5e-05	0.45	1.3e-12	0.063	0.34	-0.32	7.6e-07	0.021	0.75	0.081	0.22	0.46	1.7e-13
HOXA10	grey	-0.45	1.2e-12	0.45	1.2e-12	-0.26	6.2e-05	-0.2	0.0025	-0.52	1.8e-17	0.53	5.5e-18	0.45	8.3e-13	0.24	0.0002	-0.11	0.11	0.25	0.0001	0.2	0.0027	0.2	0.0028
HOXA5	grey	-0.21	0.0018	0.21	0.0018	-0.26	8e-05	-0.028	0.68	-0.087	0.19	0.31	1.4e-06	0.024	0.72	-0.11	0.092	-0.11	0.084	-0.048	0.47	-0.023	0.73	0.047	0.48
HOXA9	grey	-0.24	0.00025	0.24	0.00025	-0.18	0.0063	-0.11	0.11	-0.22	0.00077	0.36	1.6e-08	0.06	0.37	0.036	0.59	0.028	0.67	0.076	0.25	0.11	0.091	-0.059	0.38
HOXB2	grey	-0.14	0.031	0.14	0.031	0.12	0.07	0.028	0.67	-0.3	2.7e-06	-0.081	0.22	0.058	0.38	0.36	2.2e-08	0.38	3.5e-09	0.35	7.2e-08	0.17	0.011	-0.3	4.8e-06
HOXB7	grey	-0.49	3.7e-15	0.49	3.7e-15	-0.29	9.4e-06	-0.31	1.3e-06	-0.47	4.9e-14	0.44	3.5e-12	0.48	1.5e-14	0.2	0.0027	-0.0032	0.96	0.33	4.5e-07	0.38	4.5e-09	0.39	1.2e-09
HOXC10	grey	-0.44	6e-12	0.44	6e-12	-0.24	0.00024	-0.25	0.00012	-0.44	4.8e-12	0.32	1.1e-06	0.47	1e-13	0.24	0.00024	-0.11	0.1	0.23	0.00038	0.24	0.00021	0.38	2.3e-09
HOXD10	grey	-0.54	8.4e-19	0.54	8.4e-19	-0.29	7.2e-06	-0.35	6e-08	-0.48	1.2e-14	0.36	1.6e-08	0.6	2.2e-23	0.3	3.1e-06	-0.12	0.072	0.28	1.5e-05	0.35	7.2e-08	0.56	5e-20
HOXD11	grey	-0.49	4.2e-15	0.49	4.2e-15	-0.29	6.7e-06	-0.31	2.3e-06	-0.41	1.3e-10	0.36	1.5e-08	0.57	2.5e-21	0.24	0.00029	-0.21	0.0016	0.18	0.0062	0.29	5.9e-06	0.6	8.9e-24
HPS5	grey	-0.15	0.027	0.15	0.027	-0.13	0.043	-0.088	0.18	-0.3	3.3e-06	0.21	0.0016	0.18	0.0052	0.17	0.0089	0.22	0.00084	0.32	8.5e-07	0.28	1.3e-05	0.02	0.77
HRAS	grey	0.053	0.43	-0.053	0.43	-0.0043	0.95	-0.18	0.0071	0.23	0.00048	-0.061	0.36	0.14	0.03	-0.17	0.0091	-0.42	3.7e-11	-0.26	9.1e-05	-0.004	0.95	0.48	1.7e-14
HS3ST3A1	grey	0.3	3.7e-06	-0.3	3.7e-06	-0.0055	0.93	-0.073	0.27	0.33	3.6e-07	-0.18	0.0061	-0.11	0.093	-0.21	0.0012	-0.078	0.24	-0.11	0.11	-0.12	0.073	0.16	0.017
HS6ST2	grey	0.19	0.0044	-0.19	0.0044	-0.026	0.7	0.025	0.71	0.14	0.033	0.22	0.00095	-0.084	0.21	-0.2	0.0025	-0.17	0.011	-0.15	0.028	-0.13	0.045	-0.048	0.47
HSD11B1	grey	-0.066	0.32	0.066	0.32	0.022	0.74	0.041	0.54	-0.23	0.00043	-0.066	0.32	0.13	0.042	0.32	7.7e-07	0.17	0.0081	0.42	4.8e-11	0.12	0.078	-0.069	0.3
HSD11B2	grey	0.048	0.47	-0.048	0.47	-0.032	0.63	0.37	9e-09	0.27	2.7e-05	-0.18	0.0053	-0.14	0.035	-0.1	0.12	-0.29	6.2e-06	-0.33	3.7e-07	-0.24	0.00021	0.068	0.31
HSD17B11	grey	-0.031	0.65	0.031	0.65	0.072	0.28	0.065	0.33	-0.18	0.0077	-0.18	0.006	-0.14	0.038	0.28	1.5e-05	0.53	6.9e-18	0.42	5.4e-11	0.089	0.18	-0.44	5.4e-12
HSD17B2	grey	-0.24	0.00032	0.24	0.00032	-0.25	0.00013	-0.04	0.55	-0.13	0.044	0.053	0.43	0.29	9.3e-06	0.057	0.39	0.0052	0.94	0.13	0.047	0.21	0.0012	0.37	1e-08
HSPA2	grey	-0.31	1.2e-06	0.31	1.2e-06	0.048	0.47	-0.28	2.1e-05	-0.28	1.7e-05	0.3	2.8e-06	0.42	4.7e-11	0.19	0.0039	-0.26	5.5e-05	-0.044	0.51	0.1	0.12	0.38	1.9e-09
HSPA4L	grey	0.071	0.29	-0.071	0.29	-0.2	0.0019	-0.055	0.41	0.41	1.3e-10	0.13	0.058	-0.22	0.00093	-0.51	8.5e-17	-0.3	5.2e-06	-0.41	8e-11	-0.14	0.035	0.25	0.00012
HSPA6	grey	-0.18	0.0062	0.18	0.0062	0.0046	0.94	-0.27	3.6e-05	-0.25	9.9e-05	0.059	0.37	0.22	0.00079	0.19	0.0049	0.23	0.00037	0.51	2.9e-16	0.33	4.9e-07	0.1	0.12
HSPBAP1	grey	-0.47	8.7e-14	0.47	8.7e-14	-0.1	0.12	-0.38	2.4e-09	-0.55	3.4e-19	0.49	4.1e-15	0.32	6.5e-07	0.29	1.1e-05	0.27	4.7e-05	0.45	7.7e-13	0.41	1.4e-10	0.096	0.15
HTATSF1P2	grey	-0.33	5e-07	0.33	5e-07	-0.17	0.0091	-0.3	5.5e-06	-0.28	1.5e-05	0.25	0.00017	0.34	1e-07	0.071	0.29	0.029	0.67	0.25	0.00017	0.33	2.9e-07	0.37	9.2e-09
HTN1	grey	0.18	0.0064	-0.18	0.0064	0.22	0.00063	0.44	3e-12	0.091	0.17	-0.24	0.00024	-0.098	0.14	0.073	0.27	-0.17	0.012	-0.18	0.0057	-0.25	0.00011	-0.17	0.011
HTR3A	grey	0.091	0.17	-0.091	0.17	0.054	0.42	-0.037	0.58	0.35	5.9e-08	-0.27	4.6e-05	-0.26	9.3e-05	-0.25	0.00012	-0.0076	0.91	-0.23	0.00042	-0.098	0.14	0.12	0.081
HYAL1	grey	-0.3	3.7e-06	0.3	3.7e-06	-0.03	0.65	-0.15	0.021	-0.039	0.56	-0.041	0.54	0.21	0.0015	0.0022	0.97	-0.31	2.7e-06	-0.1	0.13	0.073	0.27	0.5	1.5e-15
IBSP	grey	-0.28	1.8e-05	0.28	1.8e-05	-0.094	0.16	-0.2	0.003	-0.46	1.8e-13	0.3	5.6e-06	0.43	1.2e-11	0.45	1.5e-12	-0.058	0.39	0.33	4.9e-07	0.14	0.04	0.13	0.053
ID1	grey	-0.33	2.2e-07	0.33	2.2e-07	-0.23	0.00044	-0.14	0.039	-0.089	0.18	0.18	0.0051	0.27	3.7e-05	-0.049	0.46	-0.21	0.0016	0.0066	0.92	0.21	0.0011	0.46	2.8e-13
ID2	grey	-0.21	0.0017	0.21	0.0017	-0.082	0.22	0.031	0.64	-0.037	0.58	-0.13	0.052	-0.23	0.00037	-0.05	0.45	0.46	1.8e-13	0.28	2.2e-05	0.3	5.9e-06	-0.23	0.00055
IDE	grey	0.077	0.25	-0.077	0.25	-0.04	0.54	-0.034	0.61	0.38	2e-09	-0.21	0.0014	-0.19	0.0032	-0.33	2.7e-07	-0.16	0.017	-0.28	1.3e-05	-0.087	0.19	0.29	8.6e-06
IER2	grey	-0.11	0.084	0.11	0.084	-0.27	2.6e-05	-0.013	0.85	0.046	0.49	0.1	0.12	-0.059	0.37	-0.19	0.0034	0.097	0.14	-0.01	0.88	0.12	0.075	0.023	0.73
IER3	grey	-0.21	0.0019	0.21	0.0019	-0.19	0.005	-0.085	0.2	-0.18	0.0079	0.19	0.0038	0.44	2.1e-12	0.22	0.001	-0.36	1.8e-08	0.01	0.88	-0.077	0.25	0.36	2.7e-08
IFFO2	grey	-0.26	5.6e-05	0.26	5.6e-05	-0.15	0.023	-0.21	0.0016	0.046	0.49	-0.029	0.66	0.27	3.4e-05	0.021	0.75	-0.29	9.3e-06	-0.15	0.019	0.046	0.49	0.61	2.5e-24
IFNE	grey	-0.41	1.1e-10	0.41	1.1e-10	-0.24	0.00032	-0.33	2.6e-07	-0.39	1.7e-09	0.3	2.9e-06	0.59	1.9e-22	0.22	0.0007	-0.18	0.0074	0.15	0.02	0.4	5.6e-10	0.6	6.1e-24
IFNK	grey	-0.083	0.21	0.083	0.21	0.0077	0.91	-0.094	0.16	-0.15	0.023	0.094	0.16	0.26	6.5e-05	0.087	0.19	-0.076	0.25	0.1	0.13	0.21	0.0017	0.22	0.001
IGF1	grey	0.087	0.19	-0.087	0.19	0.45	1.1e-12	0.37	8.4e-09	0.17	0.0087	-0.57	2.3e-21	-0.27	2.7e-05	0.24	0.00027	0.14	0.032	-0.046	0.48	-0.17	0.011	-0.35	3.8e-08
IGF2	grey	0.03	0.65	-0.03	0.65	0.23	0.00036	0.069	0.3	-0.086	0.19	-0.34	1.7e-07	0.16	0.013	0.52	2.7e-17	-0.14	0.029	0.057	0.39	-0.099	0.14	-0.011	0.87
IGFBP2	grey	0.097	0.14	-0.097	0.14	0.052	0.43	0.082	0.22	0.31	1.7e-06	-0.17	0.012	-0.11	0.094	-0.096	0.15	-0.29	1e-05	-0.31	1.8e-06	-0.28	1.7e-05	0.094	0.16
IGFBP5	grey	0.39	6.9e-10	-0.39	6.9e-10	0.46	3.4e-13	0.39	7.8e-10	0.34	2e-07	-0.56	4.1e-20	-0.35	6.4e-08	0.13	0.043	-0.13	0.056	-0.2	0.0031	-0.43	1e-11	-0.4	3.9e-10
IGFBP6	grey	0.19	0.0031	-0.19	0.0031	0.25	0.00012	0.14	0.03	0.27	3.7e-05	-0.38	3.9e-09	0.065	0.33	-0.0074	0.91	-0.31	1.4e-06	-0.28	2.4e-05	-0.13	0.056	0.3	3.7e-06
IGFL1	grey	0.24	0.00033	-0.24	0.00033	0.087	0.19	-0.002	0.98	0.35	4.5e-08	-0.19	0.0035	-0.029	0.66	-0.13	0.051	-0.32	7.7e-07	-0.27	4.1e-05	-0.17	0.0084	0.26	5.4e-05
IGFL2	grey	-0.38	3.1e-09	0.38	3.1e-09	0.0014	0.98	-0.25	0.00018	-0.33	5e-07	0.064	0.34	0.55	2e-19	0.38	4.2e-09	-0.13	0.044	0.18	0.0063	0.25	0.00012	0.55	2.2e-19
IGHV1-69	grey	-0.12	0.06	0.12	0.06	-0.12	0.064	-0.066	0.32	-0.15	0.022	0.12	0.062	-0.027	0.69	-0.051	0.45	0.35	7.9e-08	0.23	0.00047	0.22	0.0011	-0.093	0.16
IL13RA1	grey	0.35	6.9e-08	-0.35	6.9e-08	-0.028	0.68	0.00077	0.99	0.41	1.3e-10	-0.22	0.00066	0.0027	0.97	-0.17	0.012	-0.3	5.8e-06	-0.19	0.0049	-0.19	0.0038	0.33	3.2e-07
IL13RA2	grey	-0.24	0.00029	0.24	0.00029	-0.012	0.85	-0.12	0.06	-0.33	2.8e-07	0.18	0.0053	0.42	2.1e-11	0.23	0.0006	-0.08	0.23	0.29	7.3e-06	0.2	0.0027	0.29	1.2e-05
IL17RB	grey	-0.094	0.16	0.094	0.16	-0.14	0.031	-0.029	0.67	-0.1	0.13	0.34	2e-07	-0.22	0.00087	-0.19	0.0049	0.14	0.036	0.056	0.4	0.068	0.31	-0.36	3.5e-08
IL19	grey	-0.14	0.041	0.14	0.041	-0.19	0.0035	0.084	0.21	-0.017	0.8	0.098	0.14	0.01	0.88	-0.13	0.051	0.079	0.23	0.032	0.63	0.16	0.017	0.064	0.33
IL1A	grey	0.17	0.012	-0.17	0.012	-0.22	0.00096	-0.16	0.013	0.041	0.54	0.19	0.0035	0.19	0.004	-0.15	0.023	-0.063	0.34	0.0075	0.91	-0.042	0.53	0.23	0.00039
IL1F10	grey	-0.15	0.022	0.15	0.022	-0.2	0.0025	-0.19	0.0032	0.077	0.24	0.021	0.75	0.15	0.021	-0.16	0.014	-0.074	0.26	-0.07	0.29	0.14	0.029	0.52	2.4e-17
IL1R2	grey	0.25	0.00018	-0.25	0.00018	-0.069	0.3	-0.058	0.38	0.17	0.0095	0.00066	0.99	-0.13	0.048	-0.23	0.00054	0.071	0.29	0.013	0.85	-0.05	0.45	-0.1	0.13
IL20	grey	-0.33	5e-07	0.33	5e-07	-0.15	0.025	-0.13	0.052	-0.4	5.2e-10	0.23	0.00036	0.57	2.7e-21	0.25	0.00012	-0.17	0.0084	0.2	0.0027	0.24	0.0002	0.49	3.3e-15
IL20RB	grey	0.093	0.16	-0.093	0.16	-0.084	0.2	-0.065	0.33	0.37	8.1e-09	0.0058	0.93	-0.072	0.28	-0.32	9.5e-07	-0.32	9.2e-07	-0.38	2.1e-09	-0.071	0.29	0.38	1.9e-09
IL33	grey	0.32	8.7e-07	-0.32	8.7e-07	0.23	0.00037	0.29	7.2e-06	0.29	5.9e-06	-0.41	7.1e-11	-0.42	4.6e-11	-0.13	0.049	0.3	3e-06	-0.068	0.31	-0.22	0.00077	-0.45	1.5e-12
IL36G	grey	-0.52	2.2e-17	0.52	2.2e-17	-0.38	3.2e-09	-0.38	2.1e-09	-0.31	1.3e-06	0.36	3e-08	0.47	1.1e-13	0.089	0.18	0.068	0.3	0.24	0.00034	0.43	7e-12	0.62	3.8e-25
IL36RN	grey	-0.05	0.46	0.05	0.46	-0.17	0.0085	-0.18	0.0051	0.29	9.6e-06	-0.14	0.036	0.019	0.77	-0.22	0.00073	-0.097	0.14	-0.18	0.007	0.046	0.49	0.51	2.1e-16
IL4R	grey	-0.32	9.4e-07	0.32	9.4e-07	-0.42	3.7e-11	-0.48	1.6e-14	-0.28	1.5e-05	0.34	2e-07	0.36	2.6e-08	0.035	0.6	0.23	0.00037	0.4	5.5e-10	0.43	8.6e-12	0.38	3.1e-09
IL7	grey	0.24	0.00026	-0.24	0.00026	-0.13	0.052	-0.092	0.17	0.15	0.022	0.061	0.36	-0.3	3.1e-06	-0.27	4.9e-05	0.33	2.4e-07	0.059	0.38	0.11	0.11	-0.29	9.3e-06
ILF3-DT	grey	0.22	0.001	-0.22	0.001	0.1	0.13	0.14	0.035	0.11	0.1	-0.018	0.78	-0.19	0.0047	-0.15	0.022	-0.026	0.7	-0.16	0.019	-0.19	0.0049	-0.22	0.001
IMPA2	grey	-0.14	0.03	0.14	0.03	-0.049	0.46	-0.08	0.23	0.17	0.012	0.046	0.49	0.18	0.0068	-0.12	0.079	-0.52	1.5e-17	-0.31	2.1e-06	-0.08	0.23	0.6	3e-23
INA	grey	-0.0075	0.91	0.0075	0.91	-0.057	0.39	-0.053	0.43	0.058	0.39	0.12	0.077	-0.14	0.036	-0.12	0.06	-0.015	0.82	-0.022	0.74	-0.03	0.65	-0.087	0.19
INAVA	grey	0.15	0.023	-0.15	0.023	-0.19	0.0046	0.035	0.6	0.45	1e-12	0.06	0.36	-0.15	0.024	-0.36	1.5e-08	-0.39	1.6e-09	-0.42	2.7e-11	-0.16	0.013	0.23	0.00049
INHBB	grey	-0.27	3.1e-05	0.27	3.1e-05	0.08	0.23	0.23	0.00059	-0.35	8.8e-08	-0.14	0.03	0.44	5.2e-12	0.53	4.1e-18	-0.24	0.00022	0.14	0.029	-0.026	0.7	0.22	0.00065
INPP4B	grey	-0.01	0.88	0.01	0.88	-0.0083	0.9	-0.095	0.15	-0.2	0.0019	0.018	0.79	0.45	5.9e-13	0.26	8.9e-05	-0.032	0.64	0.17	0.0089	0.21	0.0017	0.36	3.2e-08
INSIG1	grey	0.16	0.014	-0.16	0.014	-0.29	1.2e-05	0.17	0.012	0.22	0.0011	0.038	0.57	-0.21	0.0014	-0.23	0.00042	0.0065	0.92	-0.13	0.043	-0.16	0.018	-0.1	0.13
INSM1	grey	-0.0012	0.99	0.0012	0.99	-0.056	0.4	-0.037	0.57	-0.12	0.075	0.18	0.0053	-0.11	0.093	-0.058	0.39	0.15	0.02	0.11	0.1	0.097	0.15	-0.3	3.2e-06
IRAK3	grey	-0.3	4.3e-06	0.3	4.3e-06	0.025	0.71	-0.025	0.7	-0.45	1.4e-12	-0.007	0.92	0.24	0.00034	0.53	3.4e-18	0.34	9.6e-08	0.62	7e-26	0.23	0.00048	-0.17	0.012
IRS2	grey	-0.049	0.46	0.049	0.46	0.21	0.0014	0.24	0.00032	-0.27	3.5e-05	-0.14	0.041	0.16	0.015	0.43	1.7e-11	-0.034	0.61	0.17	0.012	-0.13	0.042	-0.21	0.0015
IRX1	grey	-0.11	0.11	0.11	0.11	0.0062	0.93	0.18	0.0079	-0.25	0.00012	-0.042	0.53	0.31	2.6e-06	0.37	1e-08	-0.1	0.12	0.14	0.035	0.084	0.21	0.11	0.11
IRX2	grey	-0.15	0.023	0.15	0.023	-0.036	0.59	0.23	0.00046	-0.21	0.0011	0.036	0.59	0.41	1.2e-10	0.25	0.00017	-0.47	1.2e-13	-0.07	0.29	-0.042	0.53	0.35	8e-08
IRX3	grey	-0.11	0.083	0.11	0.083	-0.054	0.42	0.2	0.0031	0.099	0.13	-0.02	0.76	-0.098	0.14	-0.074	0.27	-0.22	0.00064	-0.2	0.0028	-0.018	0.79	0.048	0.47
IRX4	grey	-0.47	6.2e-14	0.47	6.2e-14	-0.25	0.00012	-0.24	0.00027	-0.39	1.4e-09	0.42	2.2e-11	0.55	2.2e-19	0.18	0.0079	-0.24	0.00024	0.16	0.017	0.29	8e-06	0.58	2.8e-22
IRX5	grey	-0.13	0.054	0.13	0.054	-0.061	0.36	0.24	0.00023	0.058	0.38	0.048	0.47	-0.0086	0.9	-0.1	0.13	-0.4	3.7e-10	-0.27	3.1e-05	-0.098	0.14	0.15	0.02
ISL1	grey	0.15	0.027	-0.15	0.027	-0.049	0.46	0.1	0.13	0.1	0.13	0.16	0.016	-0.3	2.7e-06	-0.2	0.0024	0.0094	0.89	-0.17	0.012	-0.14	0.04	-0.42	6.4e-11
ITCH	grey	0.39	1.7e-09	-0.39	1.7e-09	-0.061	0.36	0.11	0.093	0.28	2.1e-05	0.0053	0.94	-0.047	0.48	-0.15	0.021	-0.23	0.0004	-0.22	0.00069	-0.3	4.7e-06	0.013	0.84
ITGB8	grey	0.14	0.039	-0.14	0.039	-0.19	0.0035	0.08	0.23	0.042	0.53	0.32	9.5e-07	-0.09	0.17	-0.19	0.0044	-0.13	0.056	-0.09	0.18	-0.17	0.012	-0.17	0.01
ITIH5	grey	0.3	3.2e-06	-0.3	3.2e-06	0.31	1.9e-06	0.29	6.2e-06	0.37	1.3e-08	-0.41	6.8e-11	-0.46	4.7e-13	-0.2	0.0031	0.018	0.79	-0.33	2.9e-07	-0.36	2.3e-08	-0.39	1.3e-09
JADE2	grey	-0.21	0.0012	0.21	0.0012	-0.18	0.0076	-0.17	0.01	-0.35	6.9e-08	0.26	6.8e-05	0.0057	0.93	0.039	0.56	0.47	8.3e-14	0.37	1.3e-08	0.34	1.1e-07	-0.19	0.004
JAG2	grey	-0.39	1.3e-09	0.39	1.3e-09	-0.013	0.85	-0.13	0.043	-0.45	1.2e-12	0.24	0.00032	0.55	9e-20	0.36	2e-08	-0.31	2.5e-06	0.089	0.18	0.16	0.015	0.35	4.3e-08
JAZF1	grey	-0.033	0.62	0.033	0.62	0.13	0.058	-0.069	0.3	-0.33	4.8e-07	-0.081	0.22	0.19	0.0044	0.51	1.4e-16	0.28	2.1e-05	0.4	3.2e-10	0.043	0.52	-0.22	0.00077
JMY	grey	-0.34	2.1e-07	0.34	2.1e-07	-0.16	0.017	-0.19	0.0041	-0.074	0.27	-0.034	0.61	0.09	0.18	0.089	0.18	0.077	0.25	0.095	0.15	0.2	0.002	0.29	1.1e-05
JPX	grey	0.21	0.0013	-0.21	0.0013	0.15	0.028	0.036	0.59	0.13	0.055	-0.065	0.33	-0.25	0.00016	-0.063	0.34	0.072	0.28	-0.1	0.12	-0.17	0.01	-0.28	1.3e-05
JUN	grey	-0.24	0.0003	0.24	0.0003	-0.095	0.15	-0.024	0.72	-0.24	0.00024	0.15	0.021	0.42	2.1e-11	0.28	1.6e-05	-0.32	8.9e-07	0.023	0.73	0.1	0.12	0.32	7.3e-07
[truncated: 2,267 more rows]
